# Supplementary material
Source: PubMed Central journal article supplement (PMC6035057)

# Comparative Ascaroside Profiling of *Caenorhabditis* Exometabolomes

## Reveals Species-Specific ( $\omega$ ) and ( $\omega - 2$ )-Hydroxylation

### Downstream of Peroxisomal $\beta$ -Oxidation.

Chuanfu Dong,<sup>1,2</sup> Douglas K. Reilly,<sup>3</sup> Célia Bergame,<sup>4</sup> Franziska Dolke,<sup>1</sup> Jagan Srinivasan,<sup>3</sup> and

Stephan H. von Reuss\*<sup>1,4</sup>

1: Department of Bioorganic Chemistry, Max Planck Institute for Chemical Ecology,

Hans-Knoell Strasse 8, D-07745 Jena, Germany

2: Department for Integrative Evolutionary Biology, Max Planck Institute for Developmental Biology,

Max-Planck-Ring 9, D-72076 Tübingen, Germany

3: Department of Biology and Biotechnology, Worcester Polytechnic Institute,

60 Prescott Street, Worcester, MA 01605, United States

4: Laboratory of Bioanalytical Chemistry, University of Neuchâtel,

Avenue de Bellevaux 51, CH-2000 Neuchâtel, Switzerland

## Content

| <b>Figure</b>    |                                                    | <b>page</b>       |
|------------------|----------------------------------------------------|-------------------|
| <b>S1 – S13</b>  | Supporting Figures (as indicated in the main text) | <b>S2 – S22</b>   |
| <b>S14 – S95</b> | NMR spectra of isolated and synthesized components | <b>S23 – S104</b> |

\* Corresponding author: Stephan H. von Reuss

Phone: 0041 (0)32-718-2510

Fax: 0041 (0)32-718-2511

E-mail: [stephan.vonreuss@unine.ch](mailto:stephan.vonreuss@unine.ch)

**Figure S1a.** Extracted ion chromatograms for the K1 fragment ion at  $m/z$  130.1  $[C_6H_{14}OSi]^+$  from GC-EIMS analysis of TMS-derivatized crude nematode exometabolome extracts.

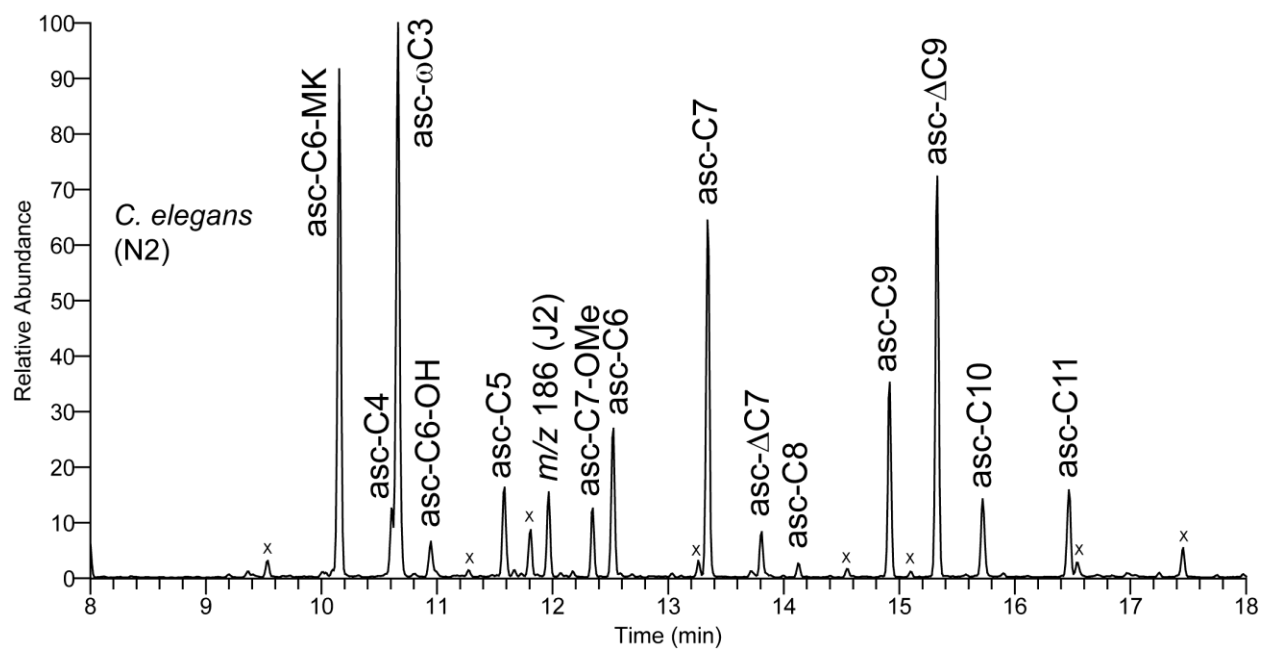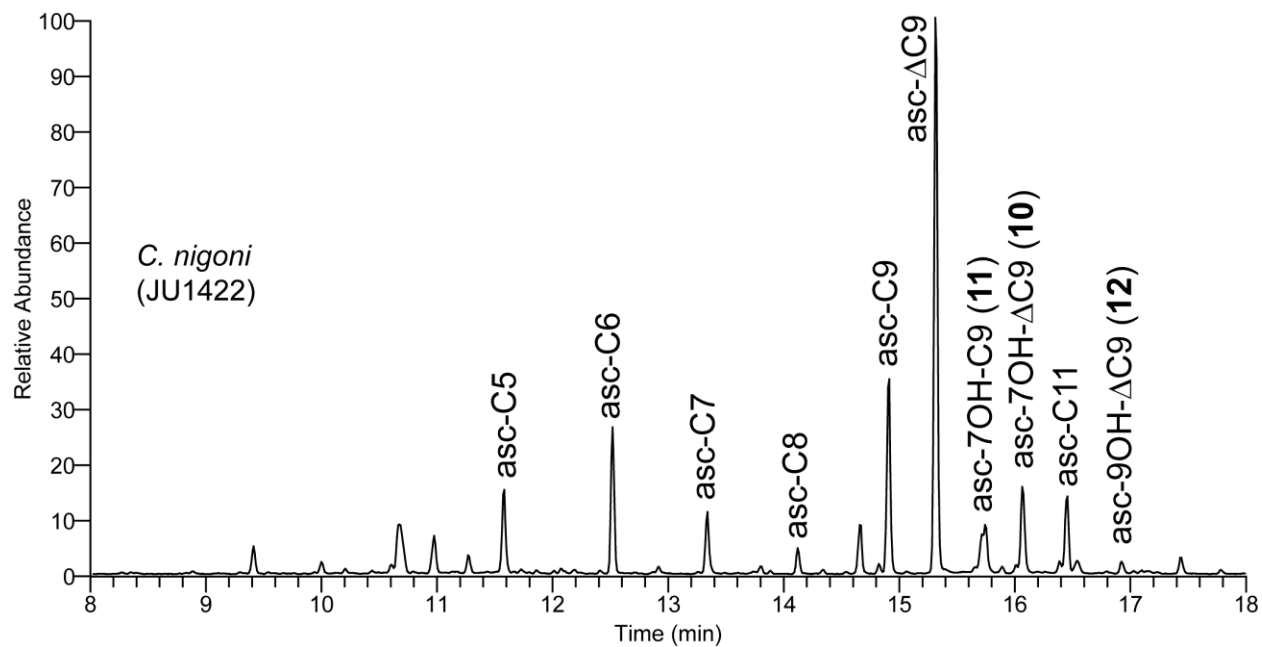

**Figure S1b.** Extracted ion chromatograms for the K1 fragment ion at  $m/z$  130.1 [ $C_6H_{14}OSi$ ] $^+$ • from GC-EIMS analysis of TMS-derivatized crude nematode exometabolome extracts.

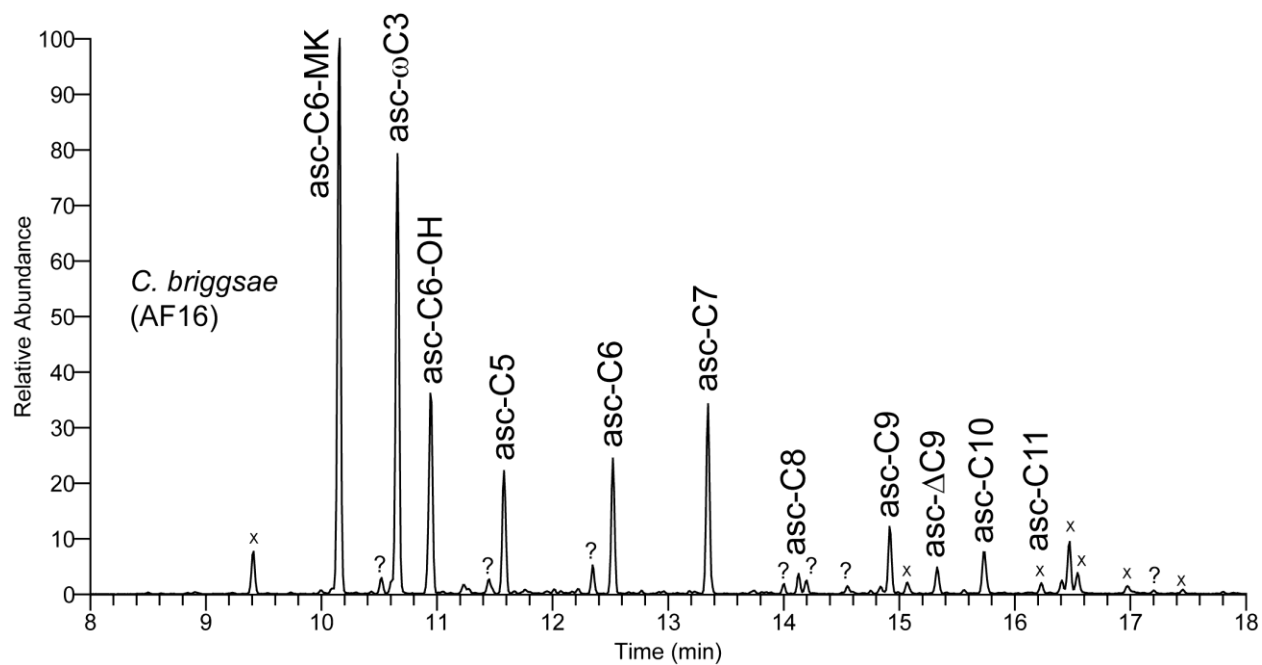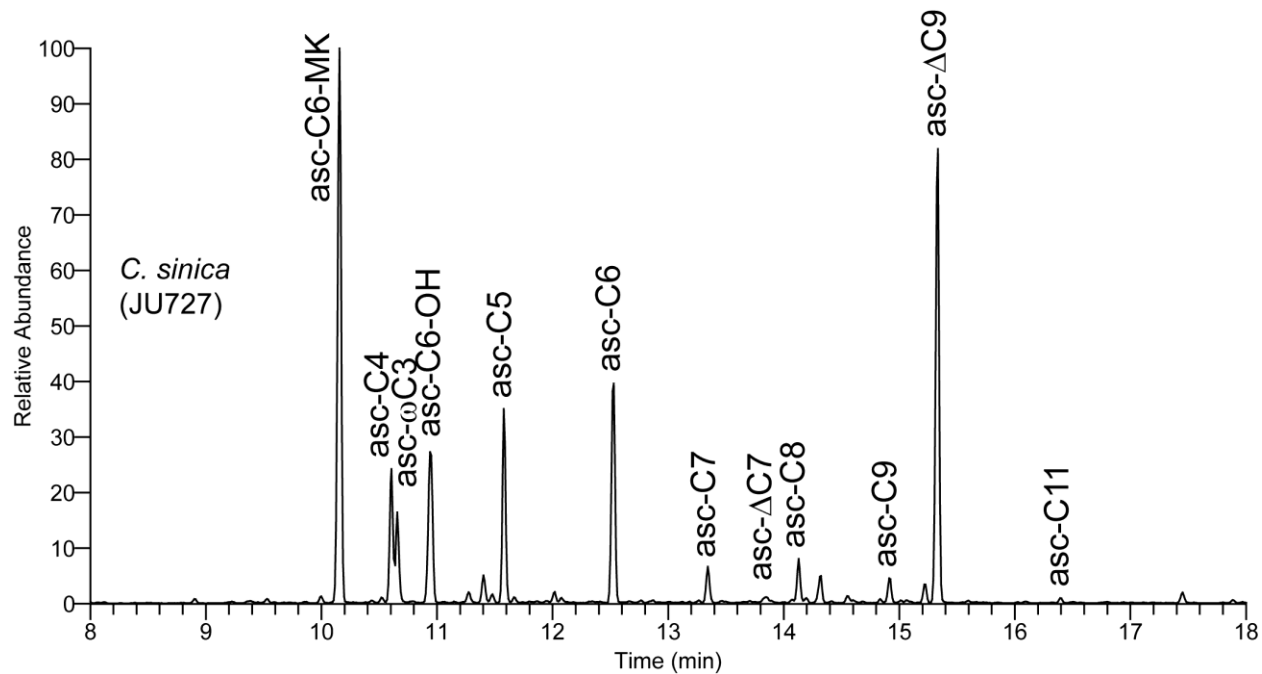

**Figure S1c.** Extracted ion chromatograms for the K1 fragment ion at  $m/z$  130.1  $[\text{C}_6\text{H}_{14}\text{OSi}]^+$  from GC-EIMS analysis of TMS-derivatized crude nematode exometabolome extracts.

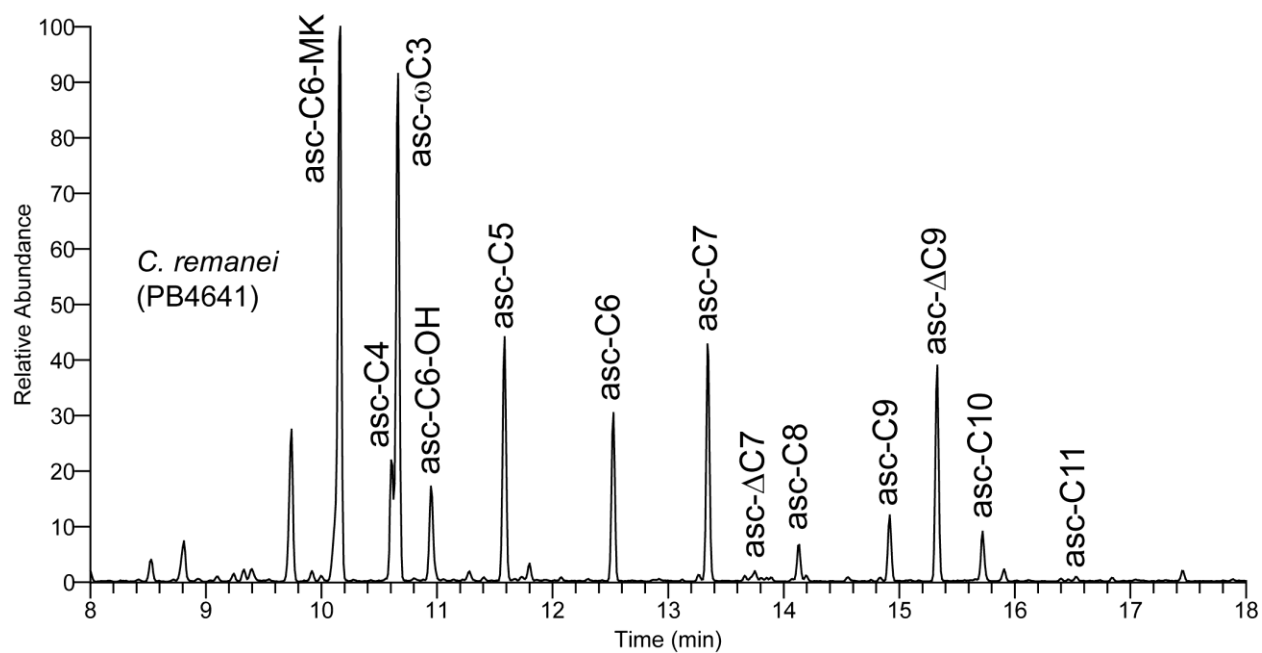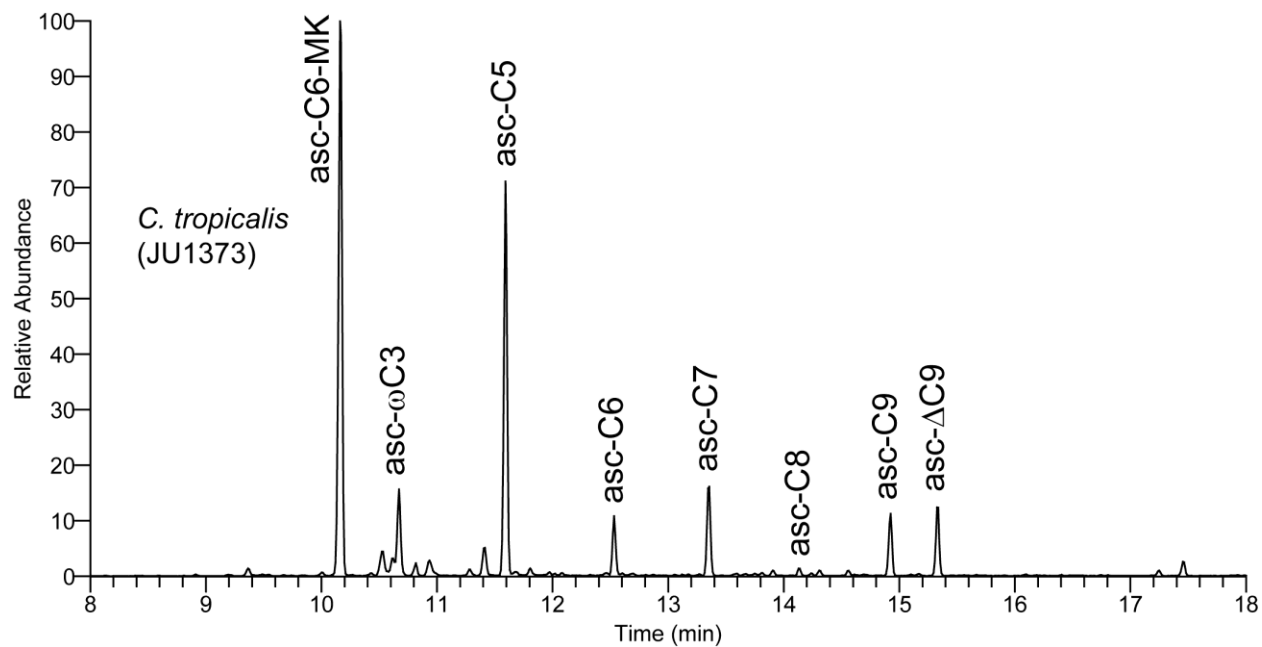



**Figure S1d.** Extracted ion chromatograms for the K1 fragment ion at  $m/z$  130.1 [ $C_6H_{14}OSi$ ]<sup>+</sup>• from GC-EIMS analysis of TMS-derivatized crude nematode exometabolome extracts.

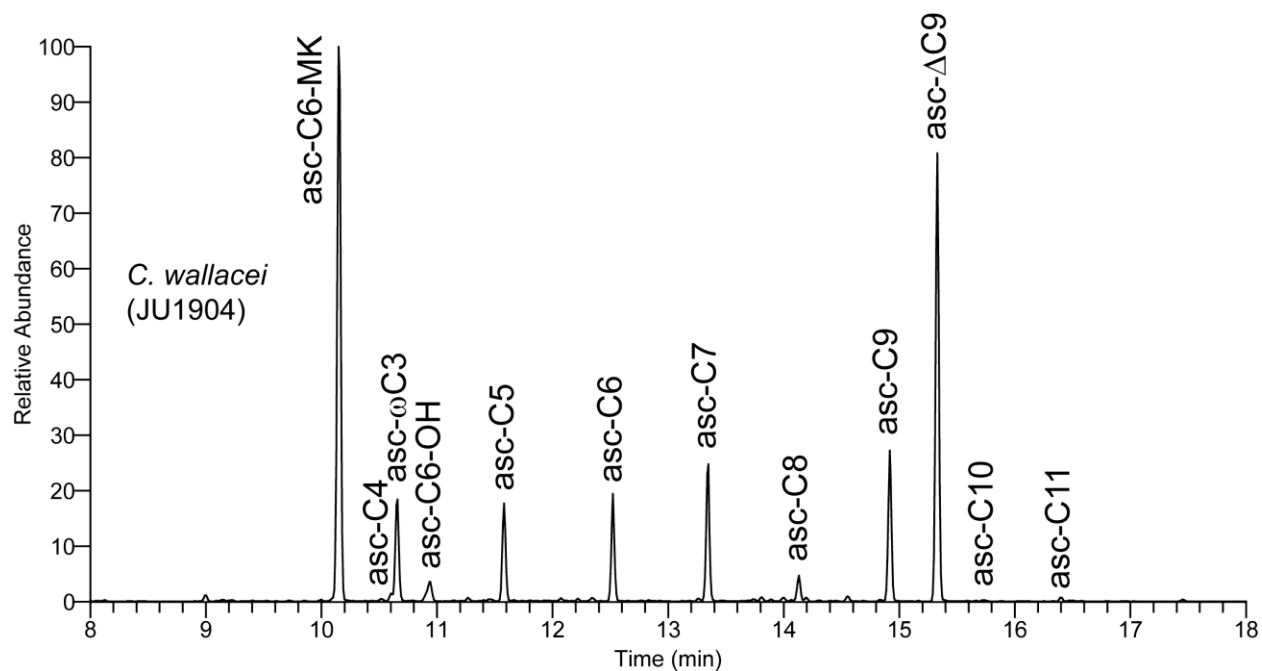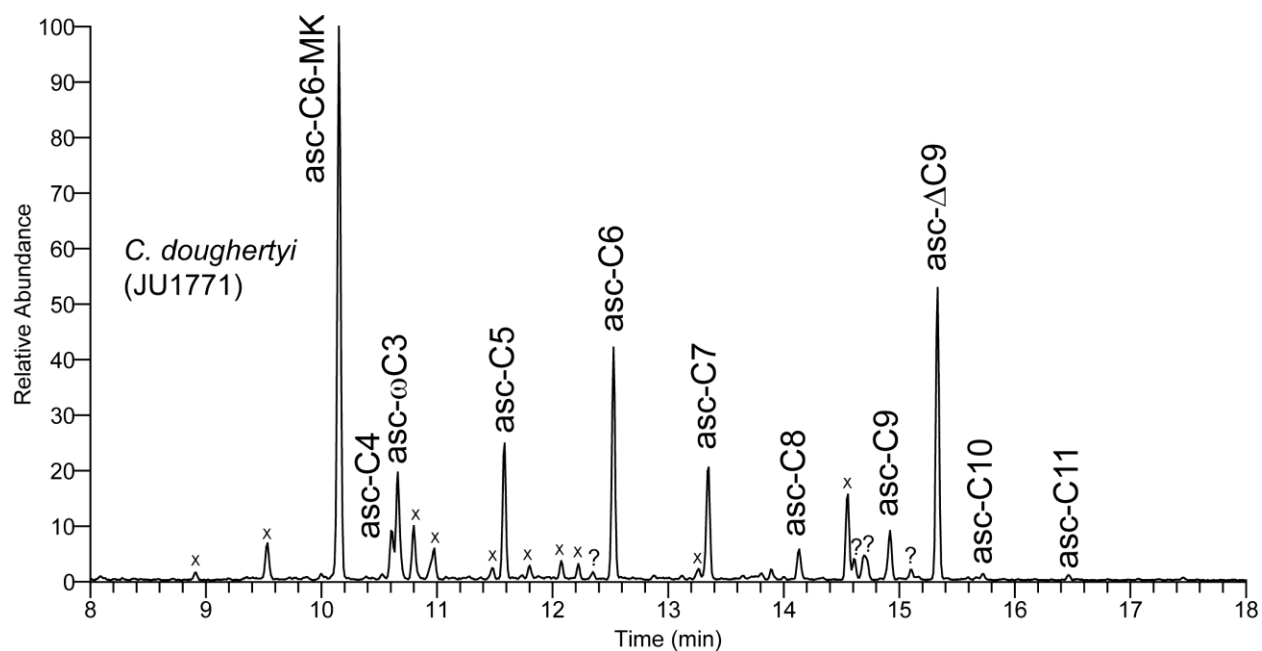

**Figure S1e.** Extracted ion chromatograms for the K1 fragment ion at  $m/z$  130.1 [ $C_6H_{14}OSi$ ]<sup>+</sup>• from GC-EIMS analysis of TMS-derivatized crude nematode exometabolome extracts.

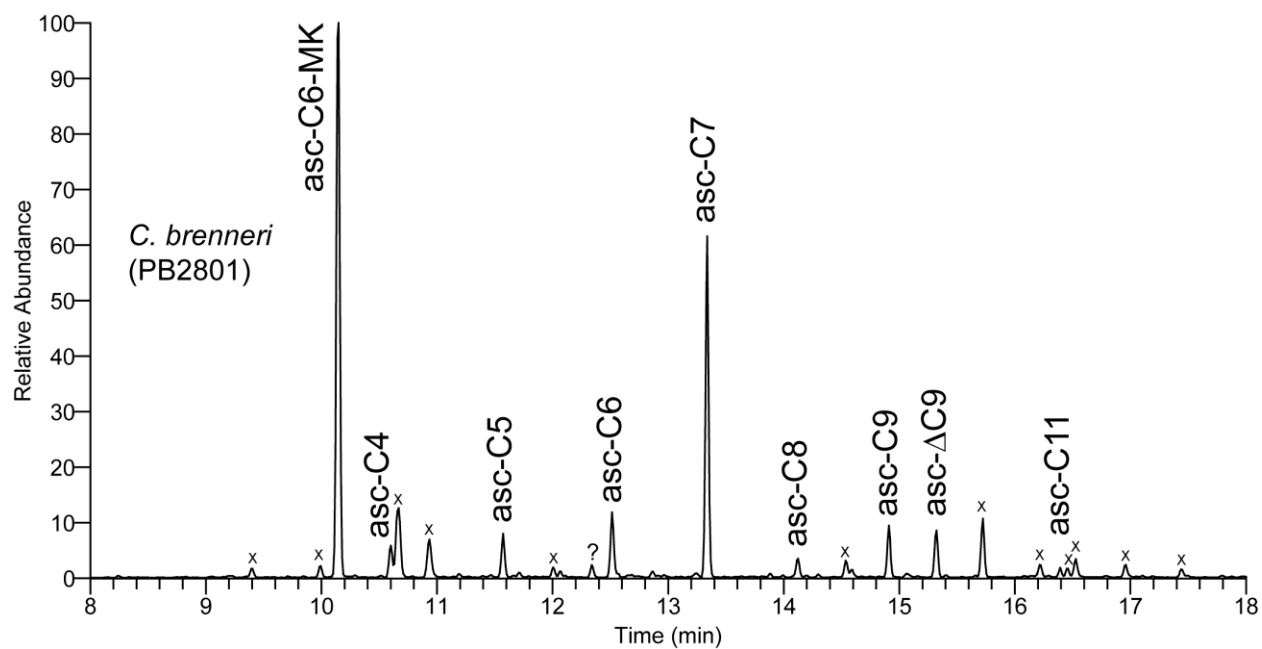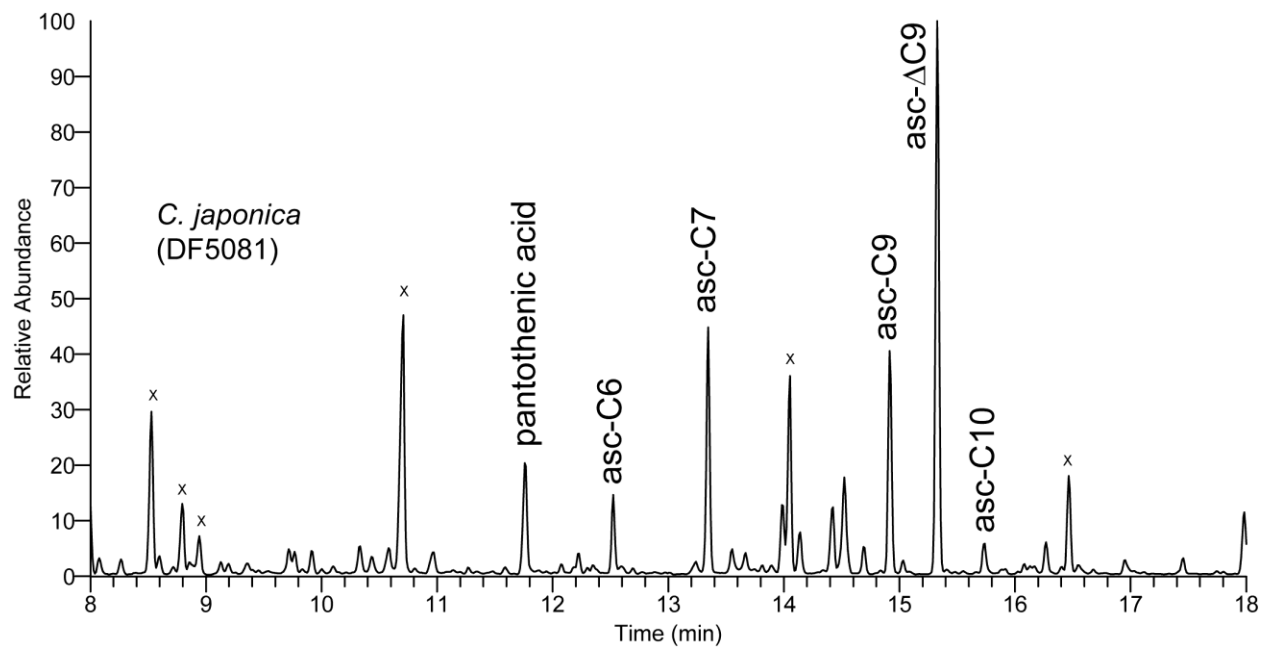

**Figure S1f.** Extracted ion chromatograms for the K1 fragment ion at  $m/z$  130.1  $[C_6H_{14}OSi]^+$  from GC-EIMS analysis of TMS-derivatized crude nematode exometabolome extracts.

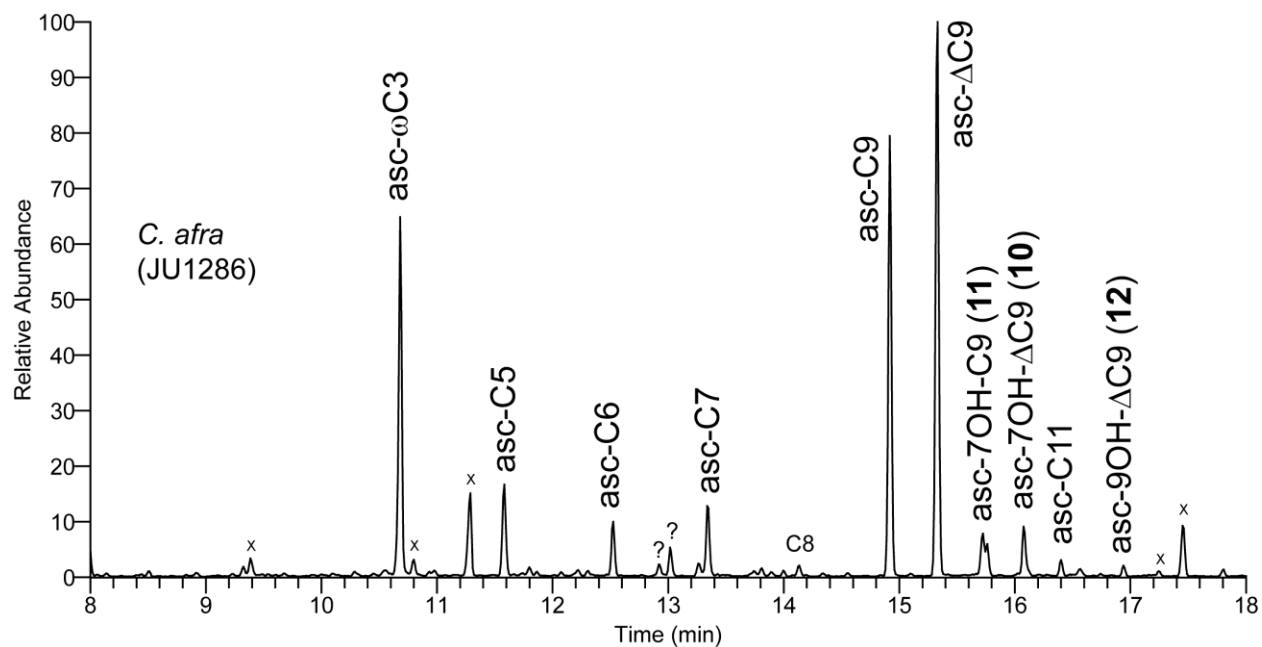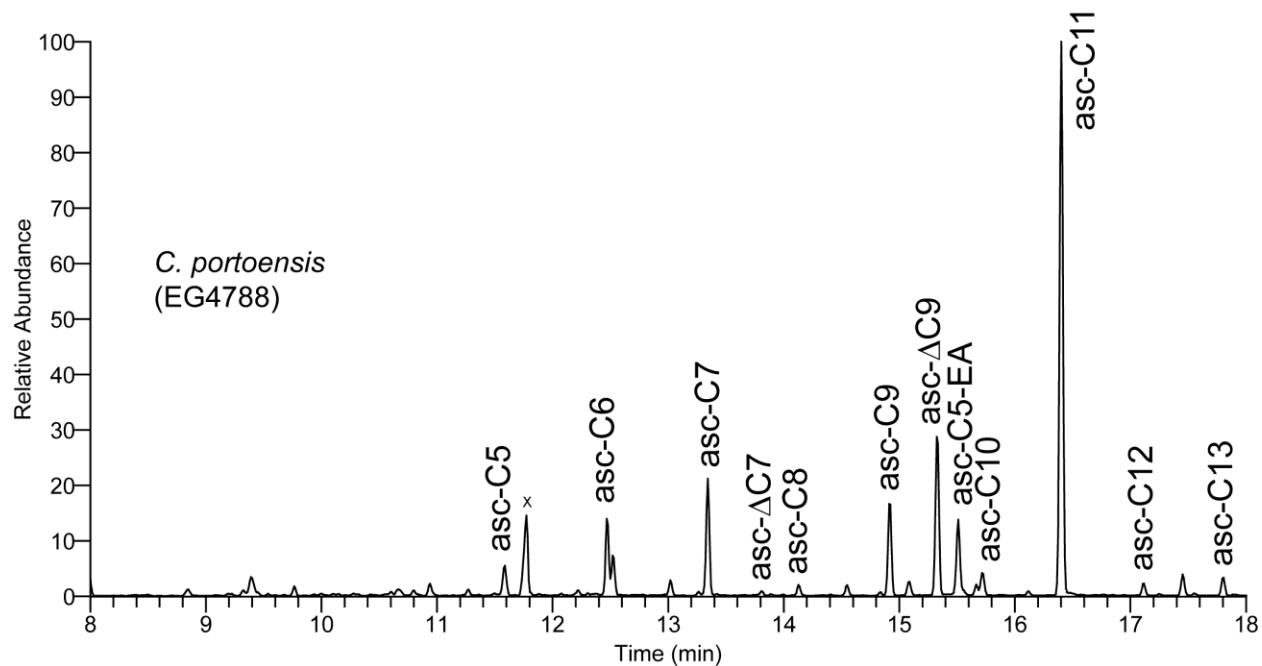

**Figure S1g.** Extracted ion chromatograms for the K1 fragment ion at 130.1  $[C_6H_{14}OSi]^+$  from GC-EIMS analysis of TMS-derivatized crude nematode exometabolome extracts.

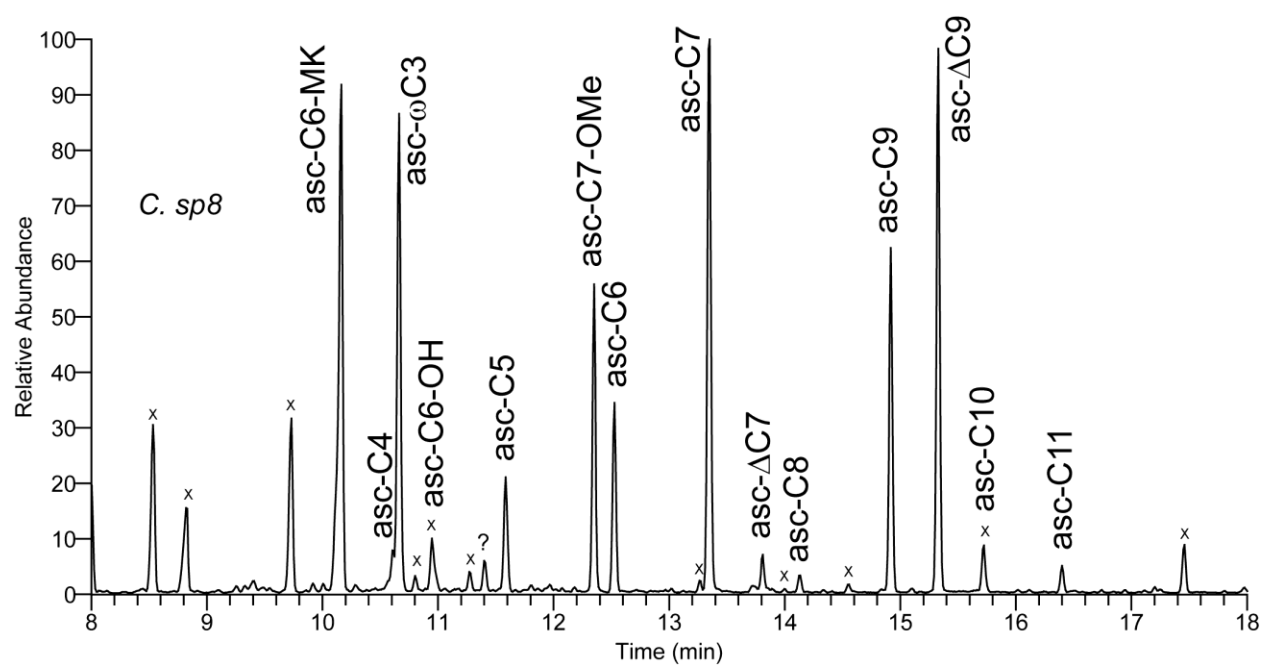

**Figure S2:** Electron ionization mass spectra of TMS derivatized (A) asc-7OH-C9 (**11**) from *C. nigoni* and *C. afra*; and (B) asc- $\beta$ OH-C9 (**3**, n = 4, bhas#10) from *Panagrellus redivivus*.

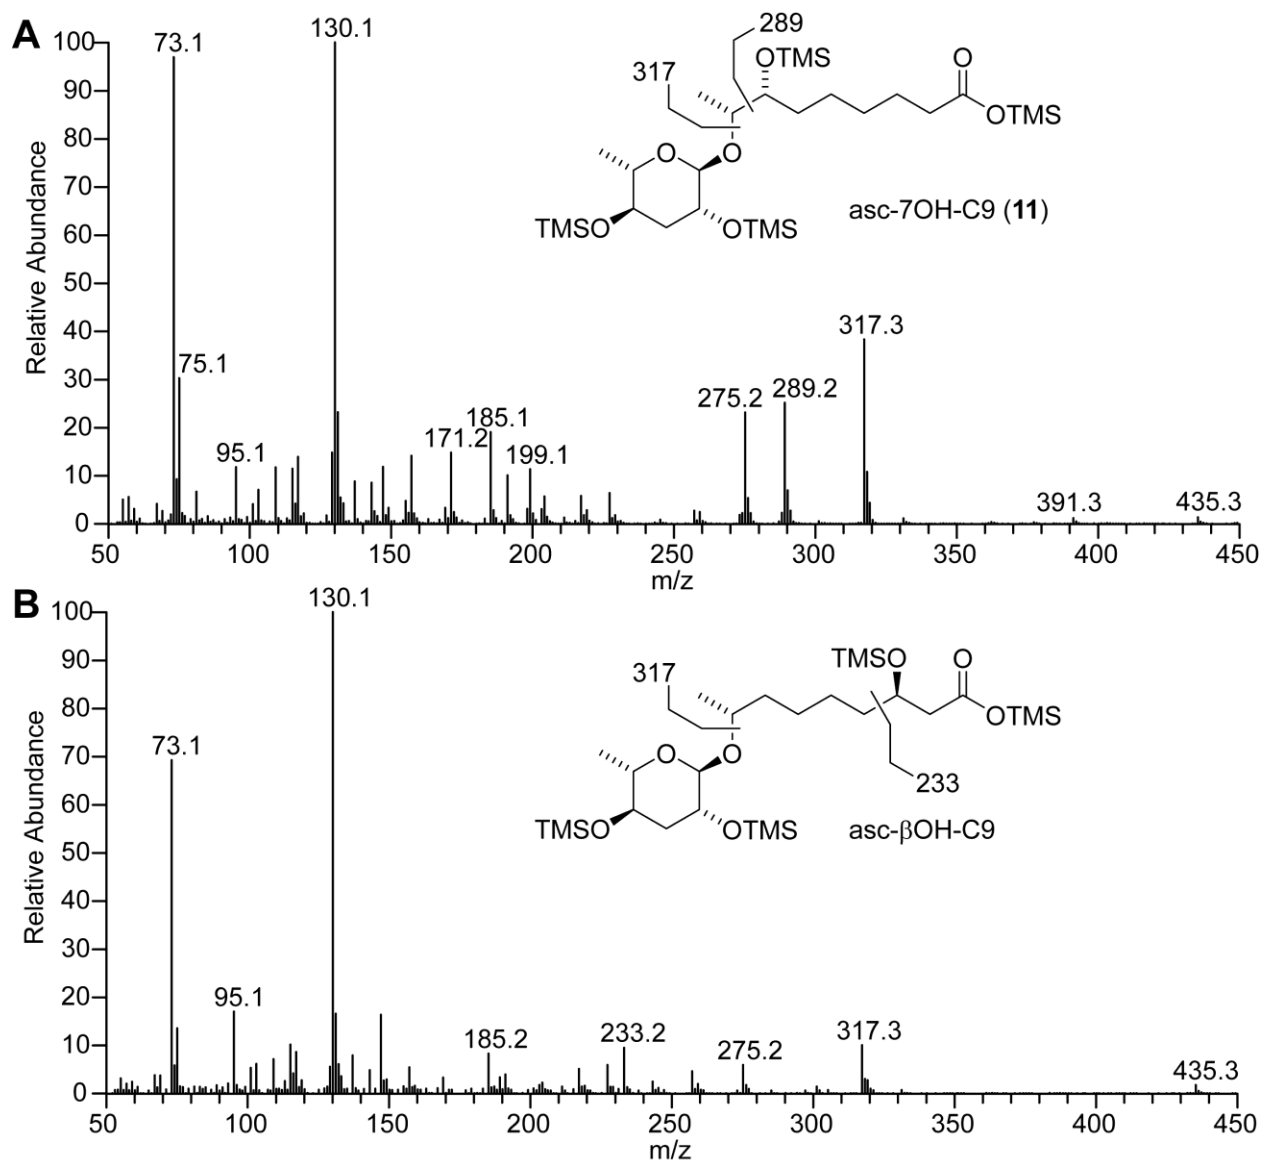

**Figure S3:** GC-EIMS extracted ion traces (EICs) for the ascaroside-derived K1 fragment at  $m/z$  130.1  $[C_6H_{14}OSi]^+$  for the crude *C. nigoni* exometabolome extract and ascaroside containing fractions obtained by chromatography on C18 using a stepwise gradient of aqueous methanol as eluent.

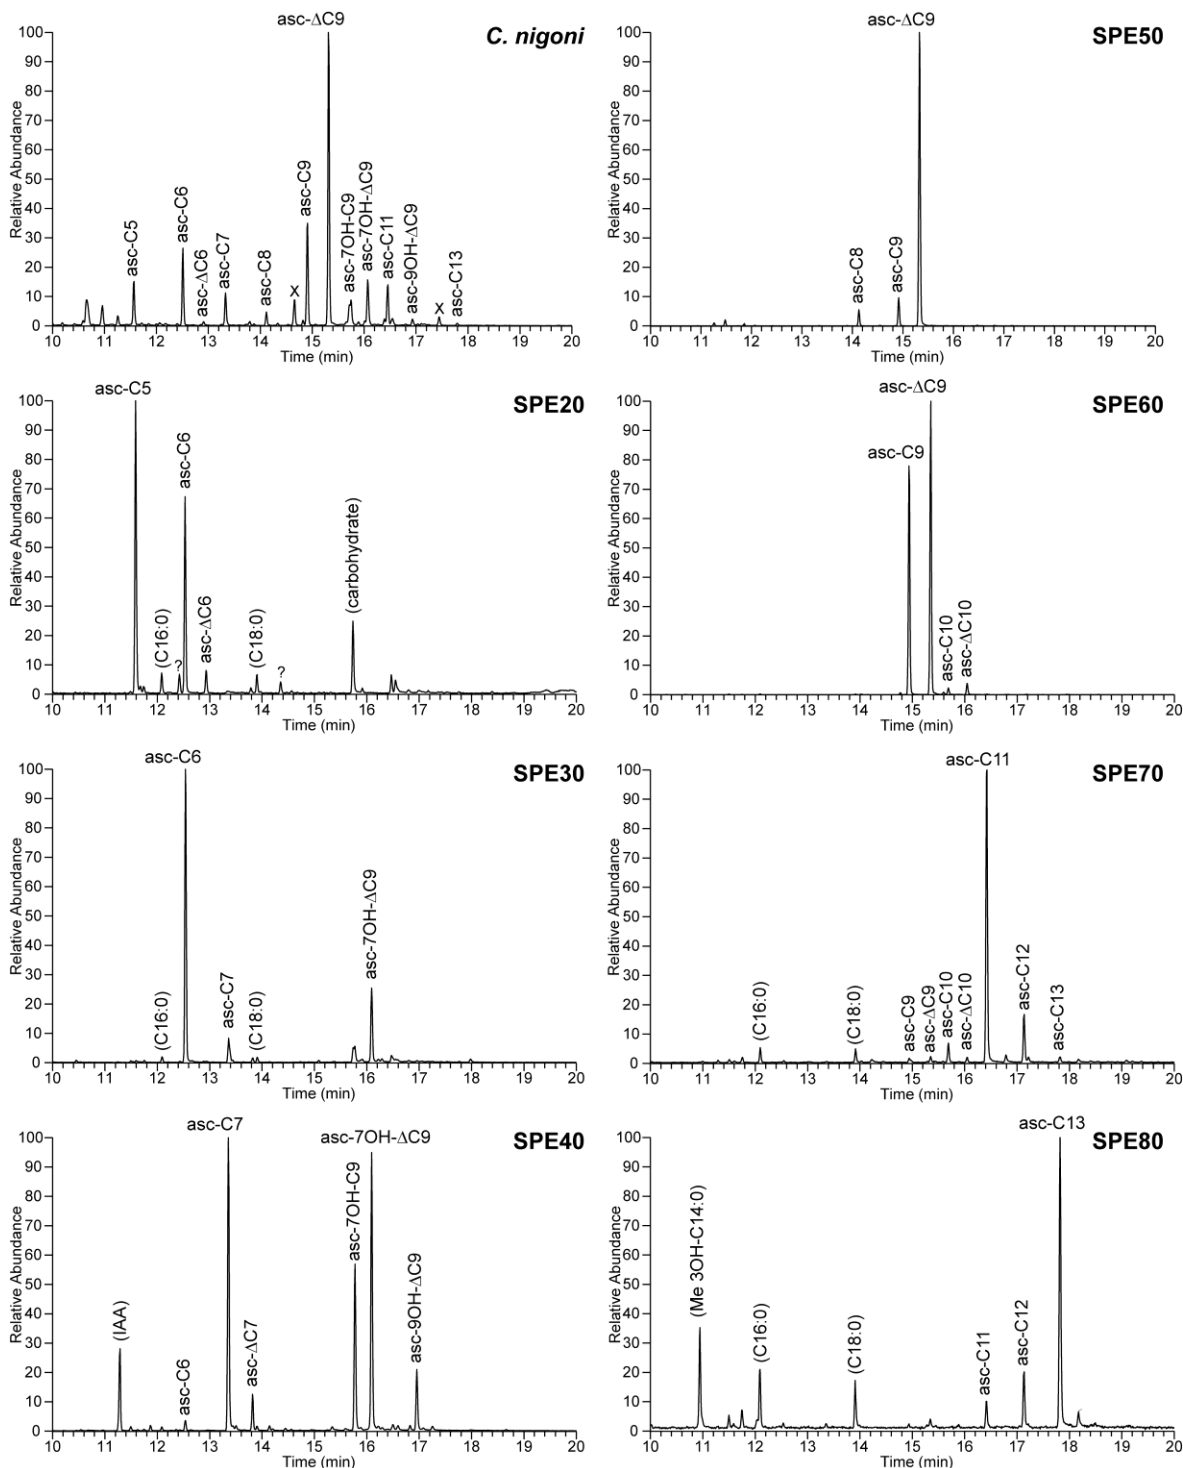

**Figure S4:**  $^1\text{H}$  NMR spectra (400 MHz,  $\text{CD}_3\text{OD}$ ) of RP- $\text{C}_{18}$ -SPE fractions of the *C. nigoni* exometabolome extract.

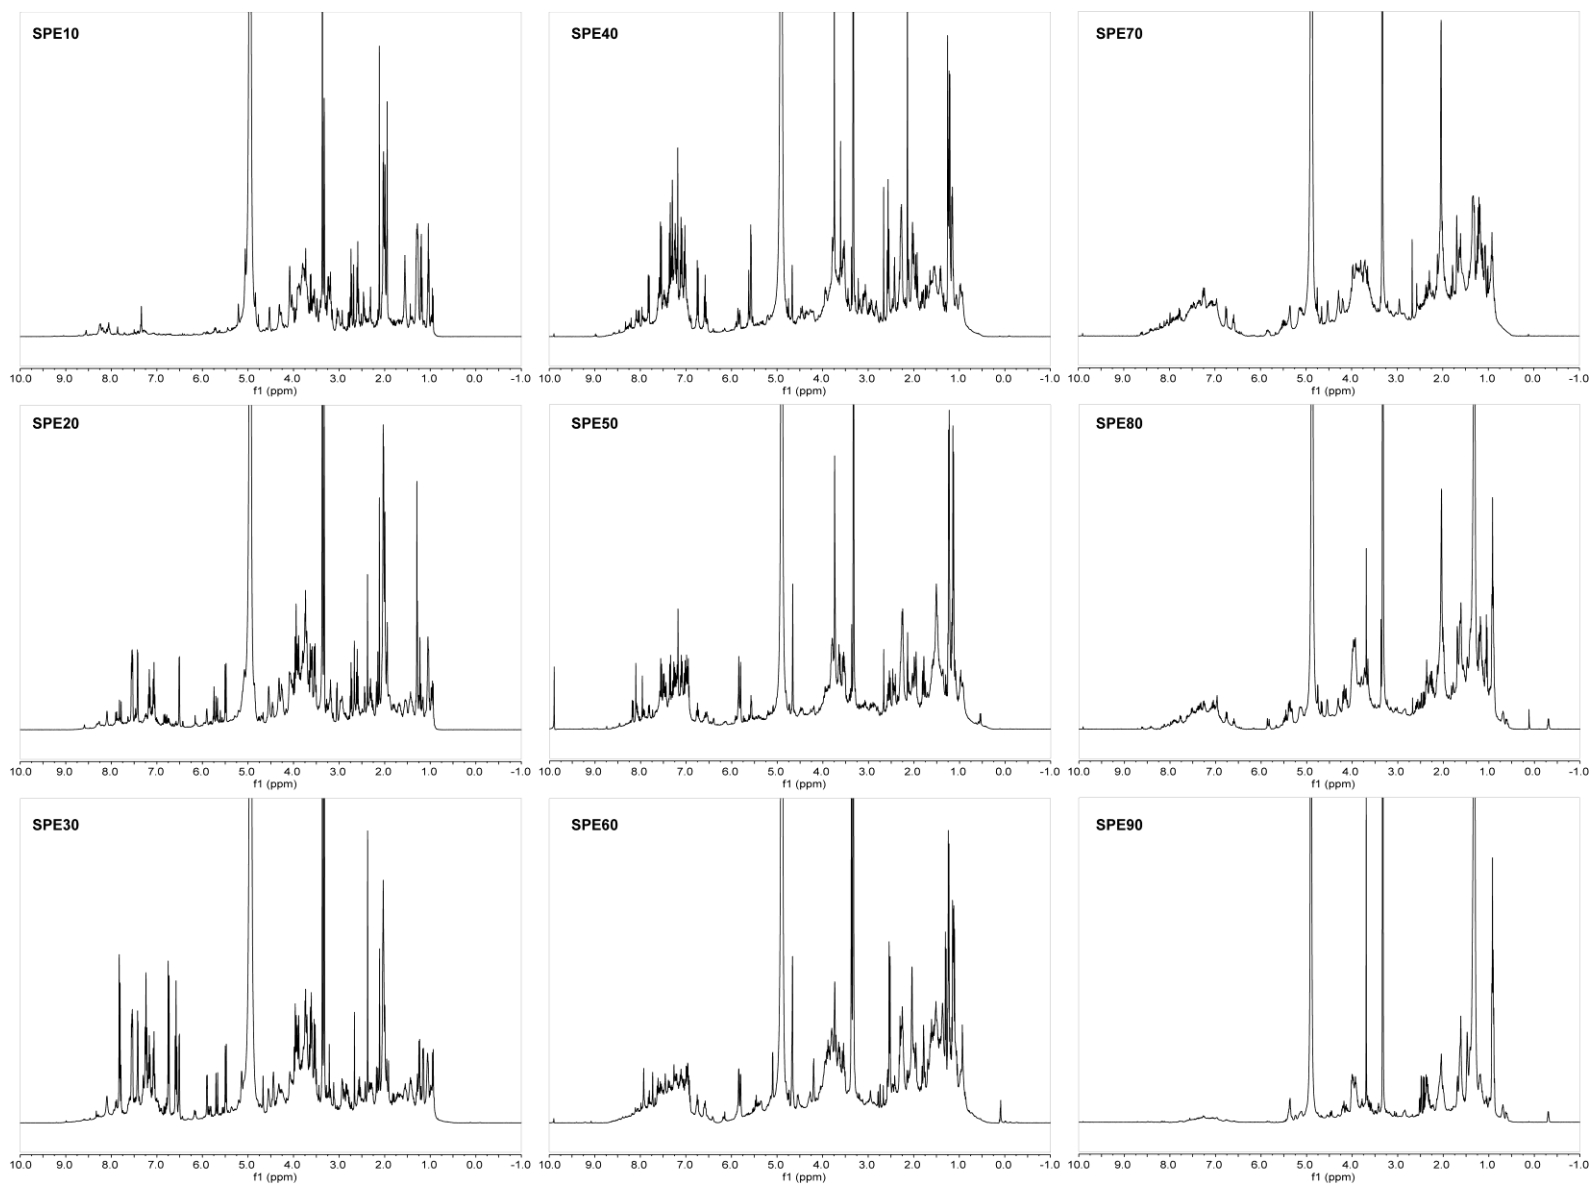

**Figure S5.** Section of the dqf-COSY spectrum of the *C. nigoni* exometabolome fraction SPE40 showing signals corresponding to indole-3-acetic acid (IAA, auxin) and anthranilic acid.

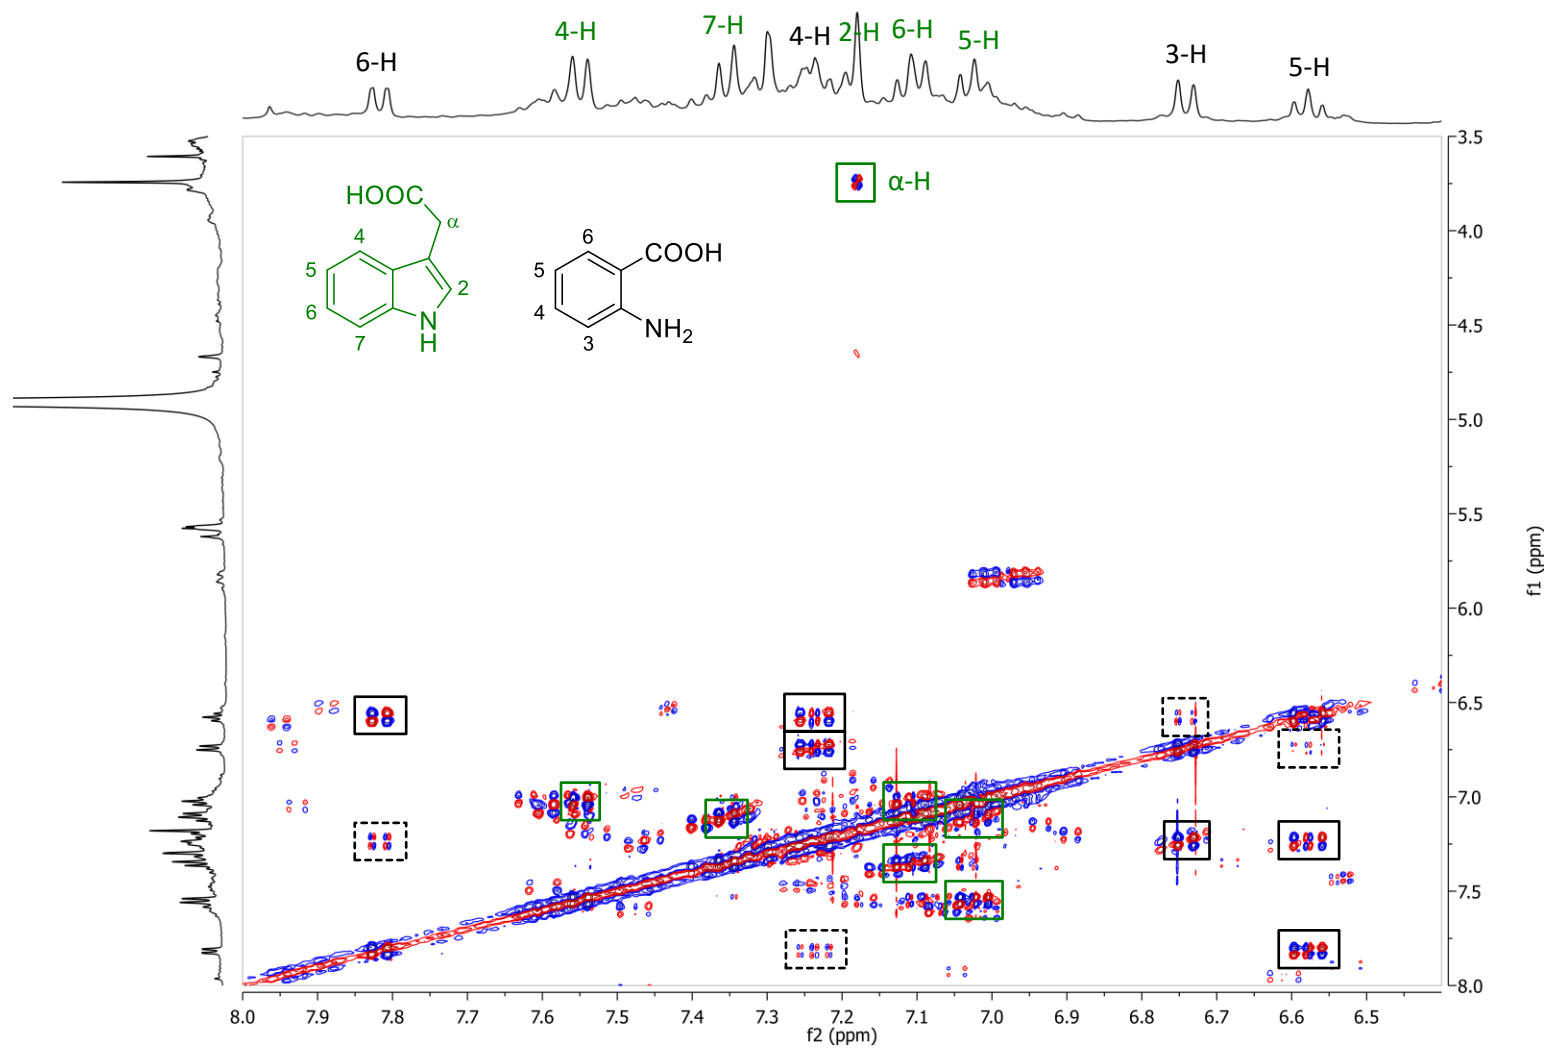



**Figure S6:** Determination of diastereomeric excess ( $de > 99\%$ ) of *threo-18a* and *erythro-18b* by  $^1\text{H}$  NMR spectroscopy (400 MHz,  $\text{CDCl}_3$ ).

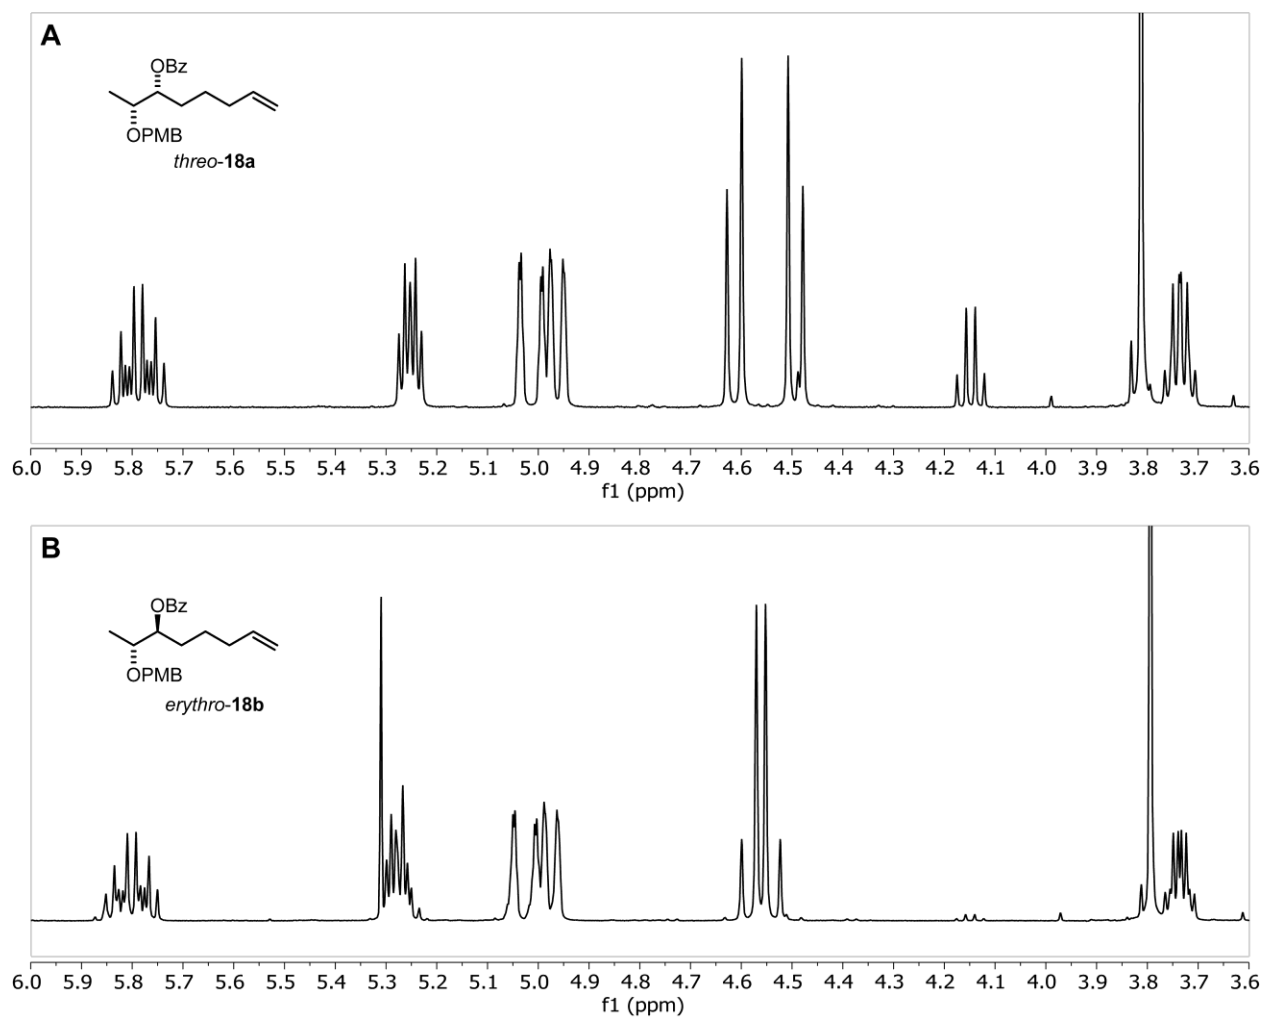

**Figure S7a:** Assignment of *(7R,8R)*-threo configuration for the natural asc-7OH- $\Delta$ C9 (**10**) isolated from *C. nigoni* by comparison of  $^1\text{H}$  NMR spectra with those of synthetic standards (**10a** and **10b**).

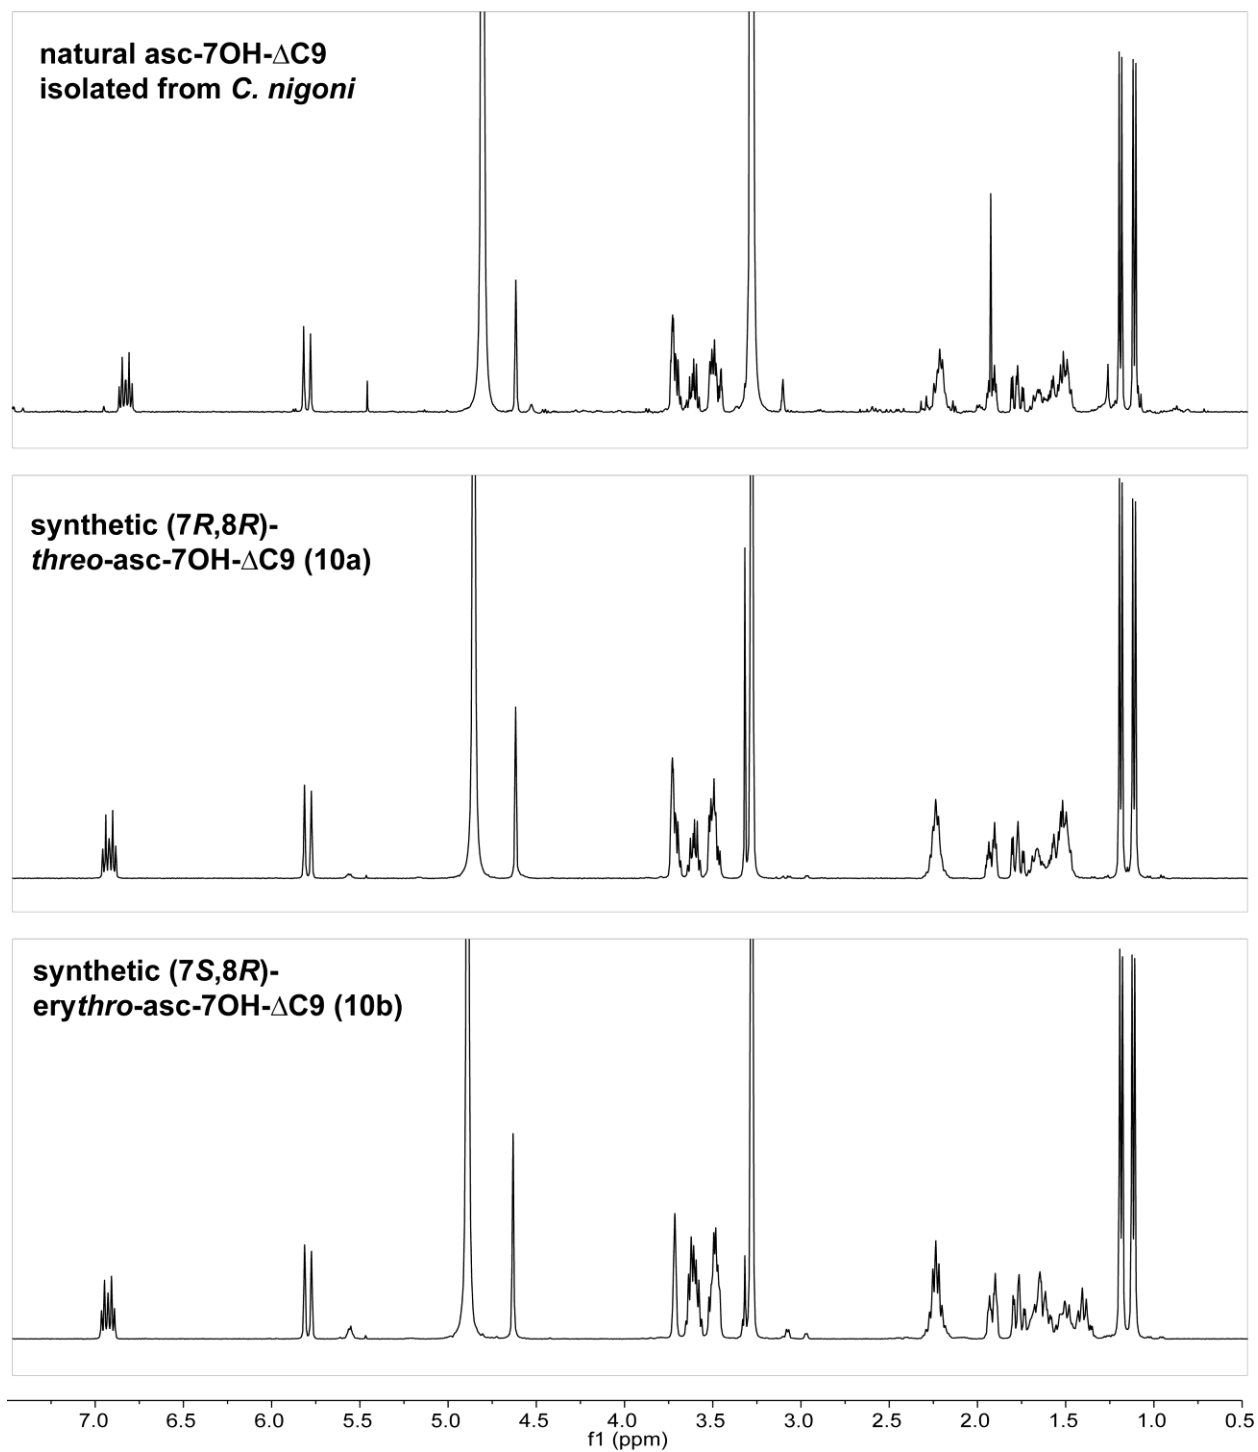

**Figure S7b:** Assignment of *(7R,8R)*-*threo* configuration for the natural asc-7OH- $\Delta$ C9 (**10**) isolated from *C. nigoni* by comparison of  $^1\text{H}$  NMR spectra with those of synthetic standards (**10a** and **10b**).

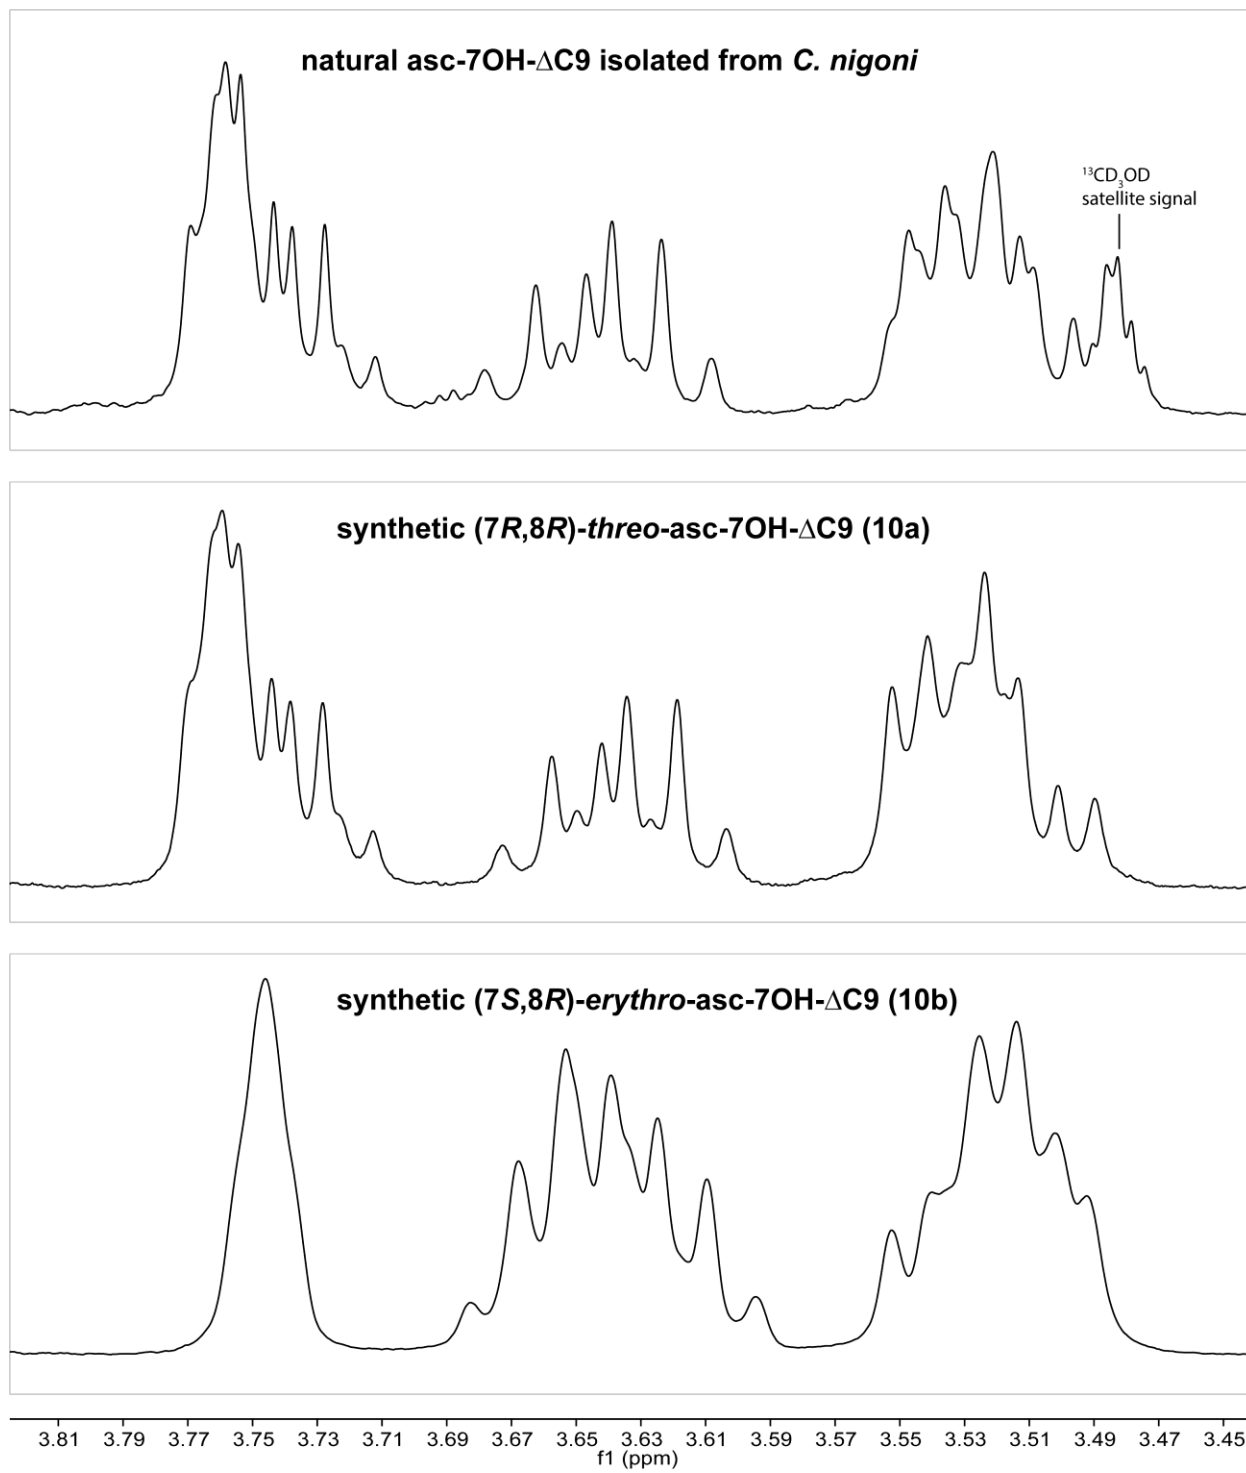

**Figure S8:** Chemical correlation of *threo*-asc-7OH- $\Delta$ C9 (**10**) and asc-9OH- $\Delta$ C9 (**12**) from *C. nigoni* with synthetic standards of *threo*-asc-7OH- $\Delta$ C9 (**10a**), *erythro*-asc-7OH- $\Delta$ C9 (**10b**), and asc-9OH- $\Delta$ C9 (**12**) using GC-EIMS extracted ion chromatograms for the J1 fragment ions at  $m/z$  433.2 [C<sub>19</sub>H<sub>41</sub>O<sub>5</sub>Si<sub>3</sub>]<sup>+</sup>.

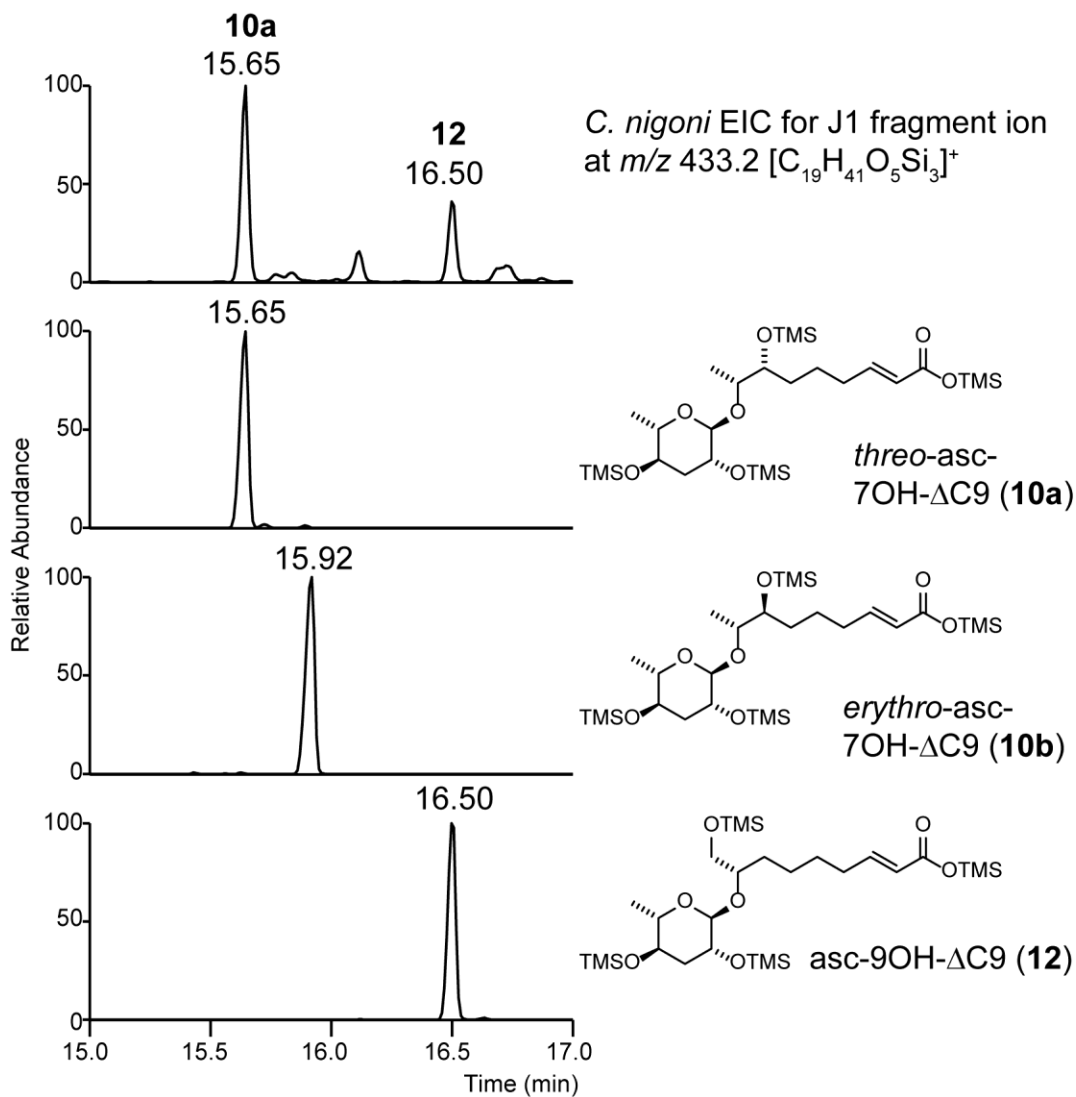

**Figure S9:** Chemical correlation of *threo*-asc-7OH-C9 (**11a**) from *C. nigoni* with synthetic standards obtained by Pd/C-catalyzed hydrogenation of *threo*-asc-7OH- $\Delta$ C9 (**10a**) and *erythro*-asc-7OH- $\Delta$ C9 (**10b**) using GC-EIMS extracted ion chromatograms for the J2 fragment ions at  $m/z$  317.2 [C<sub>15</sub>H<sub>33</sub>O<sub>3</sub>Si<sub>2</sub>]<sup>+</sup>.

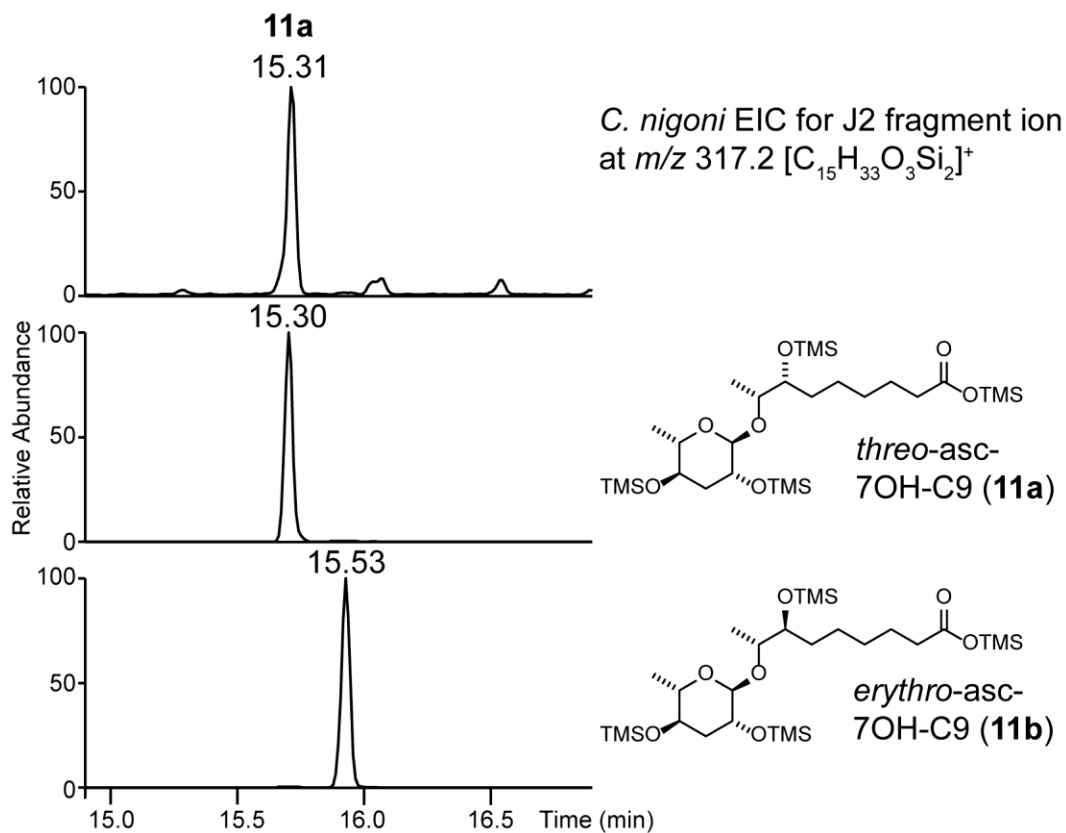

**Figure S10:** Confirmation of the structure assignment of natural asc-9OH- $\Delta$ C9 (**12**) from *C. nigoni* by comparison of the  $^1\text{H}$  NMR spectra of an isolated mixture of asc-9OH- $\Delta$ C9 (**12**) and *threo*-asc-9OH-C9 (**11a**) with those of isolated *threo*-asc-9OH-C9 (**11a**) and synthetic asc-9OH- $\Delta$ C9 (**12**).

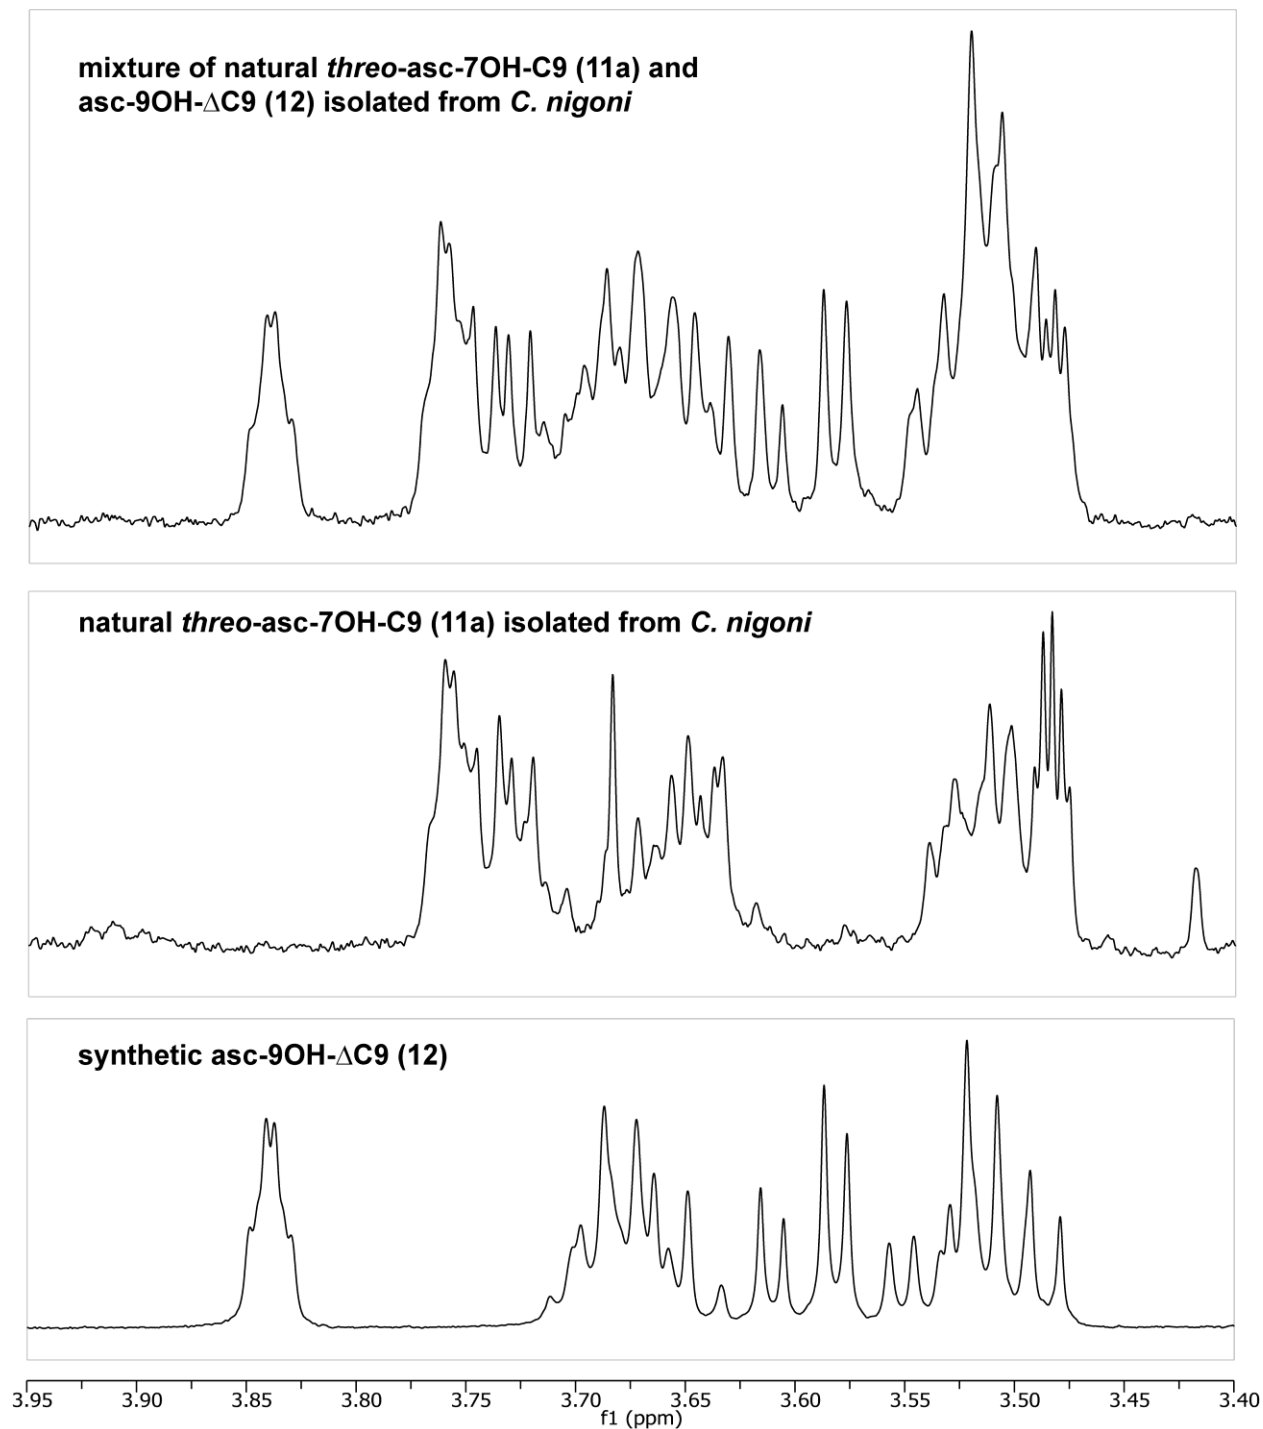

**Figure S11:** Extracted ion chromatograms of GC-EIMS screening for the ascarioside specific K1 fragment ion signal at  $m/z$  130.1 [ $C_6H_{14}OSi$ ] $^{+•}$  for (A) the *C. nigoni* (JU1422) exometabolome extract and (B) the *C. afra* (JU1286) exometabolome extract.

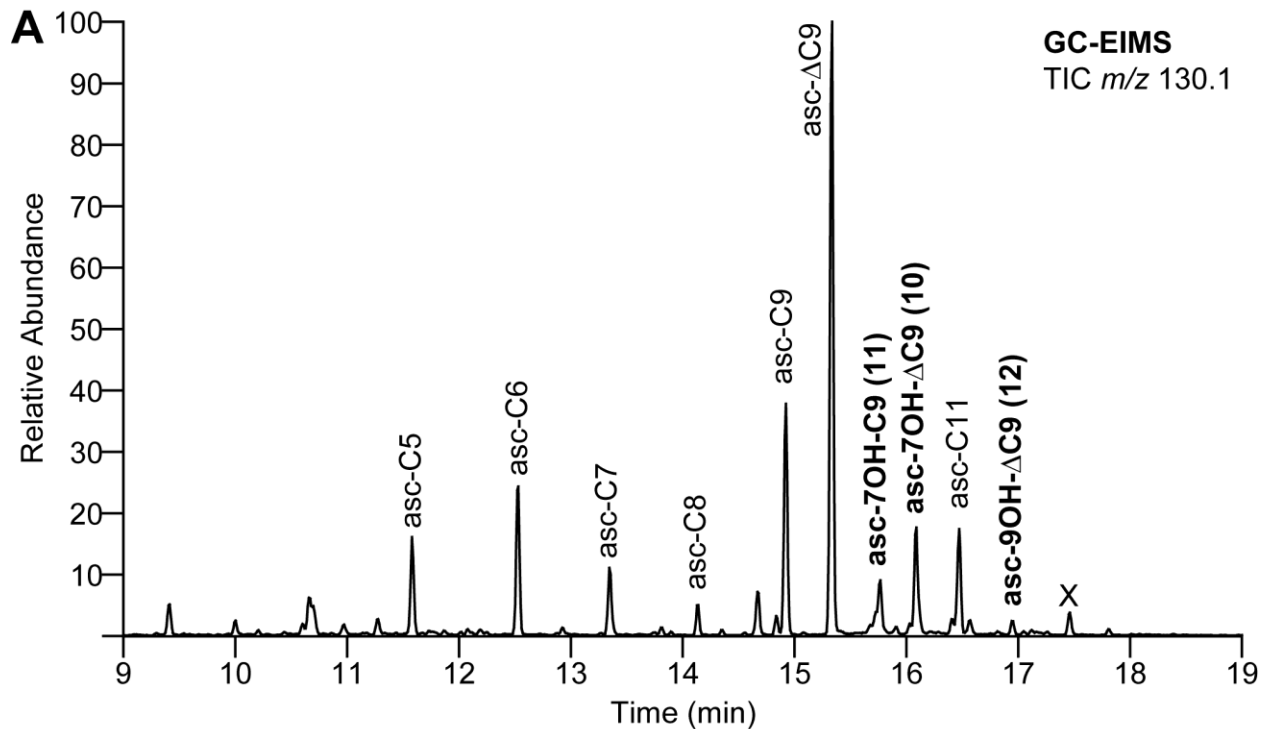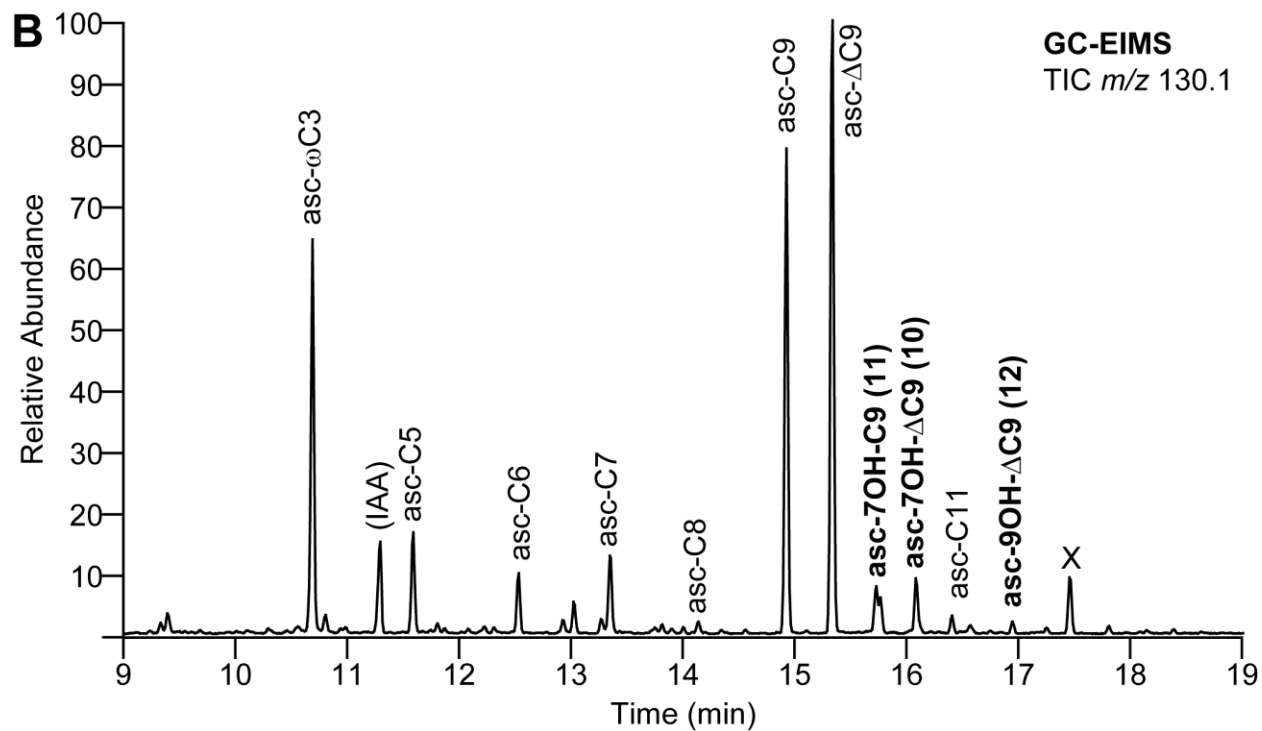

**Figure S12:** Total ion chromatograms of HPLC-ESI(-)-MS/MS precursor ion screens for  $m/z$  73.1  $[C_3H_5O_2]^-$  for (A) the *C. nigoni* (JU1422) exometabolome extract and (B) the *C. afra* (JU1286) exometabolome extract.

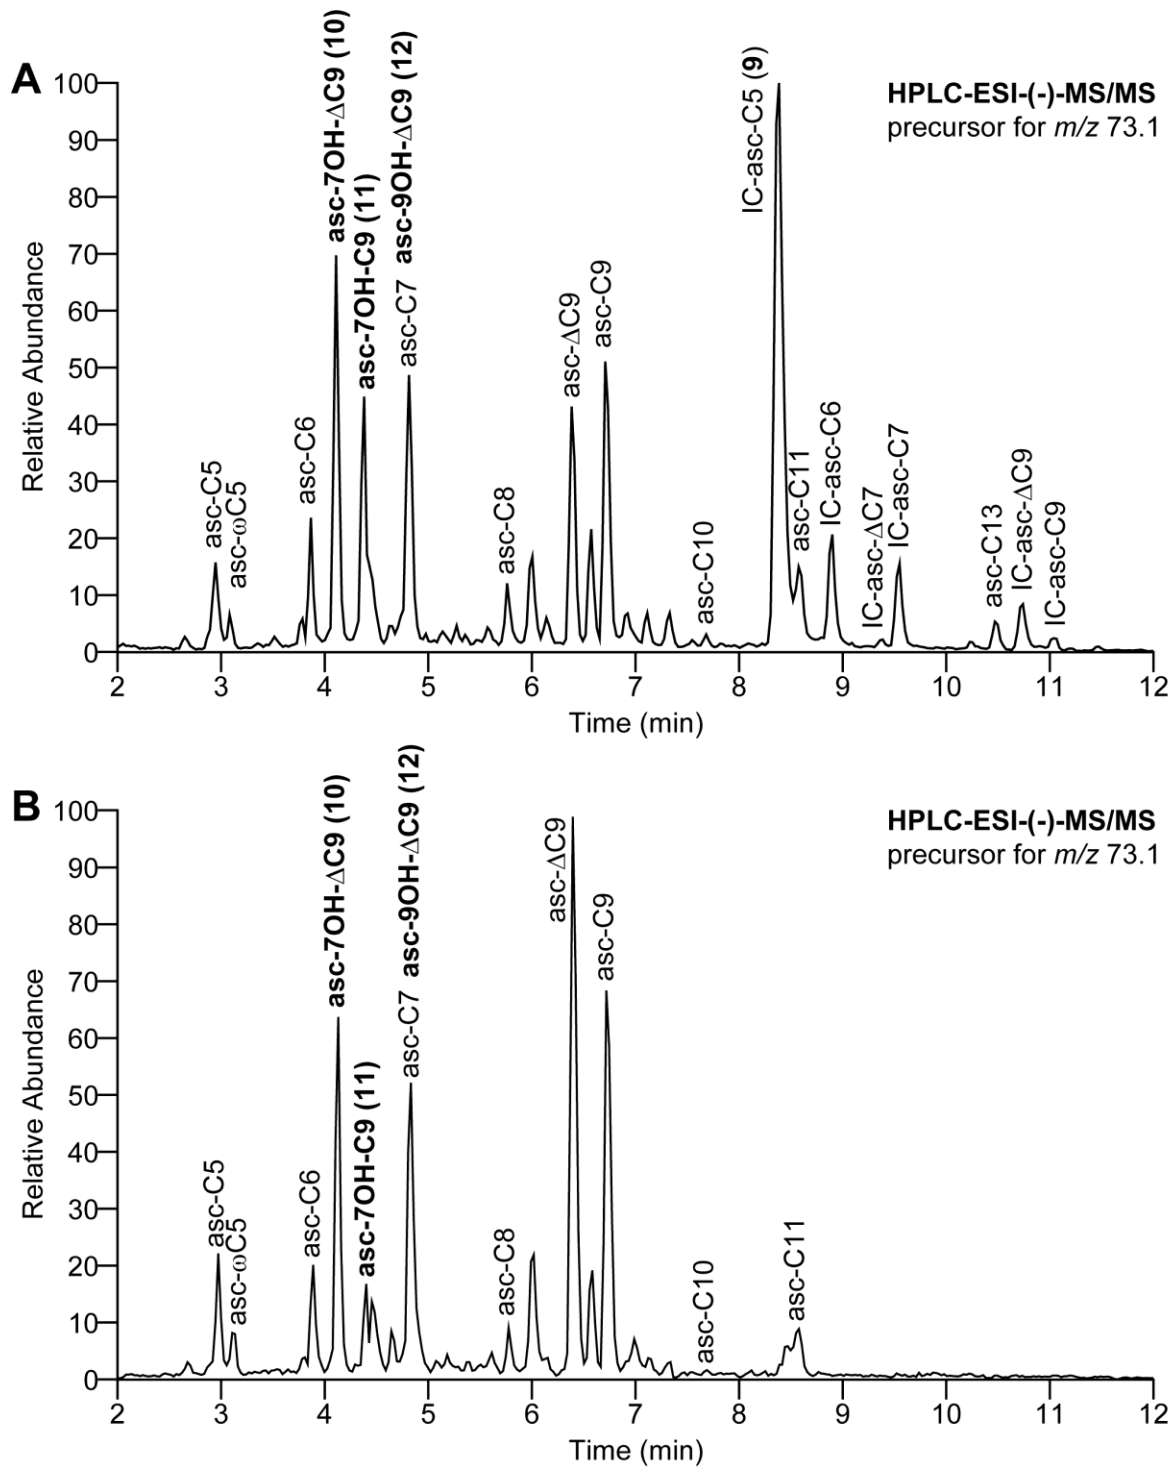



**Figure 13a:** Male response of *C. nigoni*; Wilcoxon Matched-Pairs Signed Rank Test; control vs. 1  $\mu$ M ascaroside #3 derivative; Male Response: \*\*\*\*  $p < 0.0001$ , \*\*  $p = 0.0052$ , \*  $p = 0.0266$ ,  $n \geq 13$ .

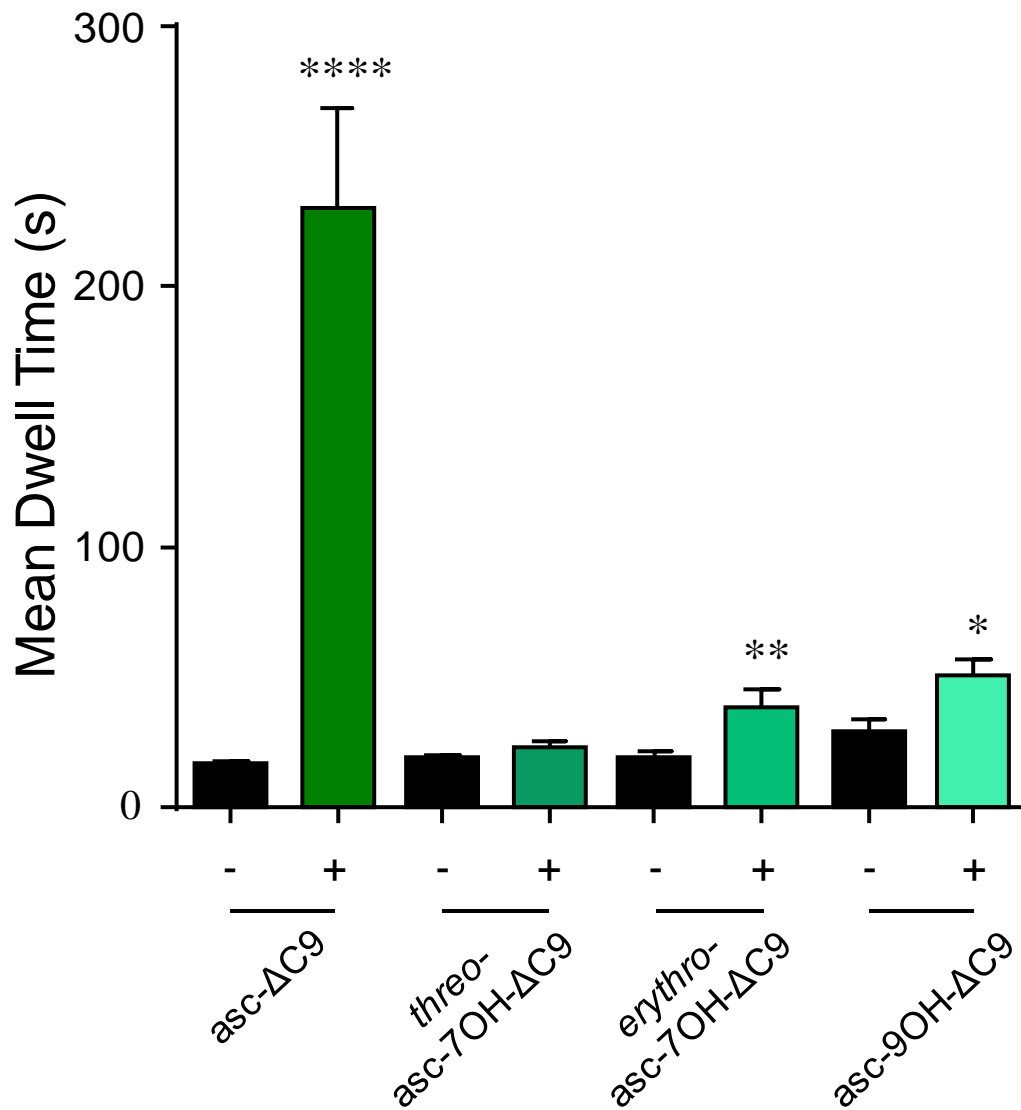

**Figure 13b:** Female response of *C. nigoni*; Wilcoxon Matched-Pairs Signed Rank Test; control vs. 1  $\mu$ M ascaroside #3 derivative; Female Response: n.s. ( $p > 0.05$ ),  $n \geq 10$ .

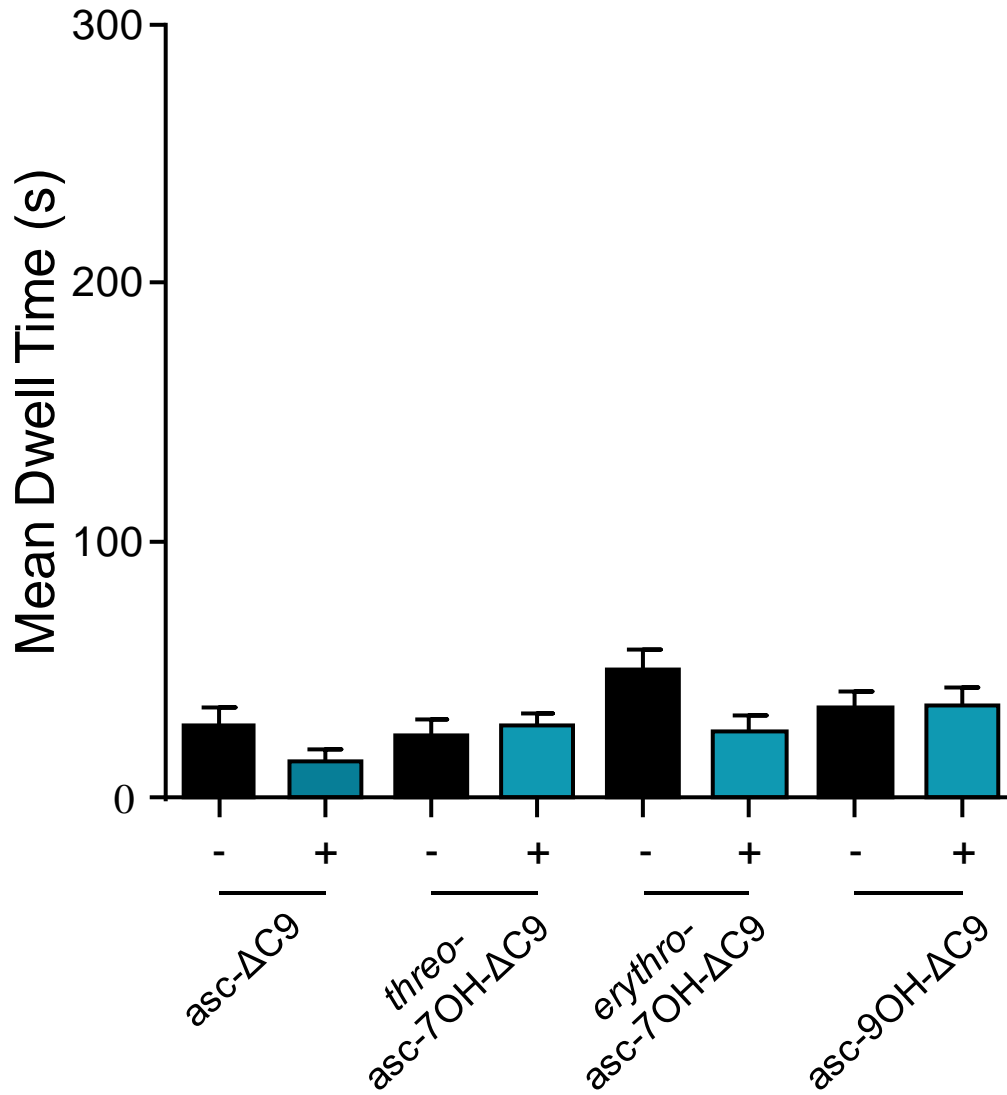

**Figure S14:**  $^1\text{H}$  NMR spectrum of synthetic (*R*)-Methyl 2-(4-methoxybenzyloxy)propanoate (**15**) in  $\text{CDCl}_3$ .

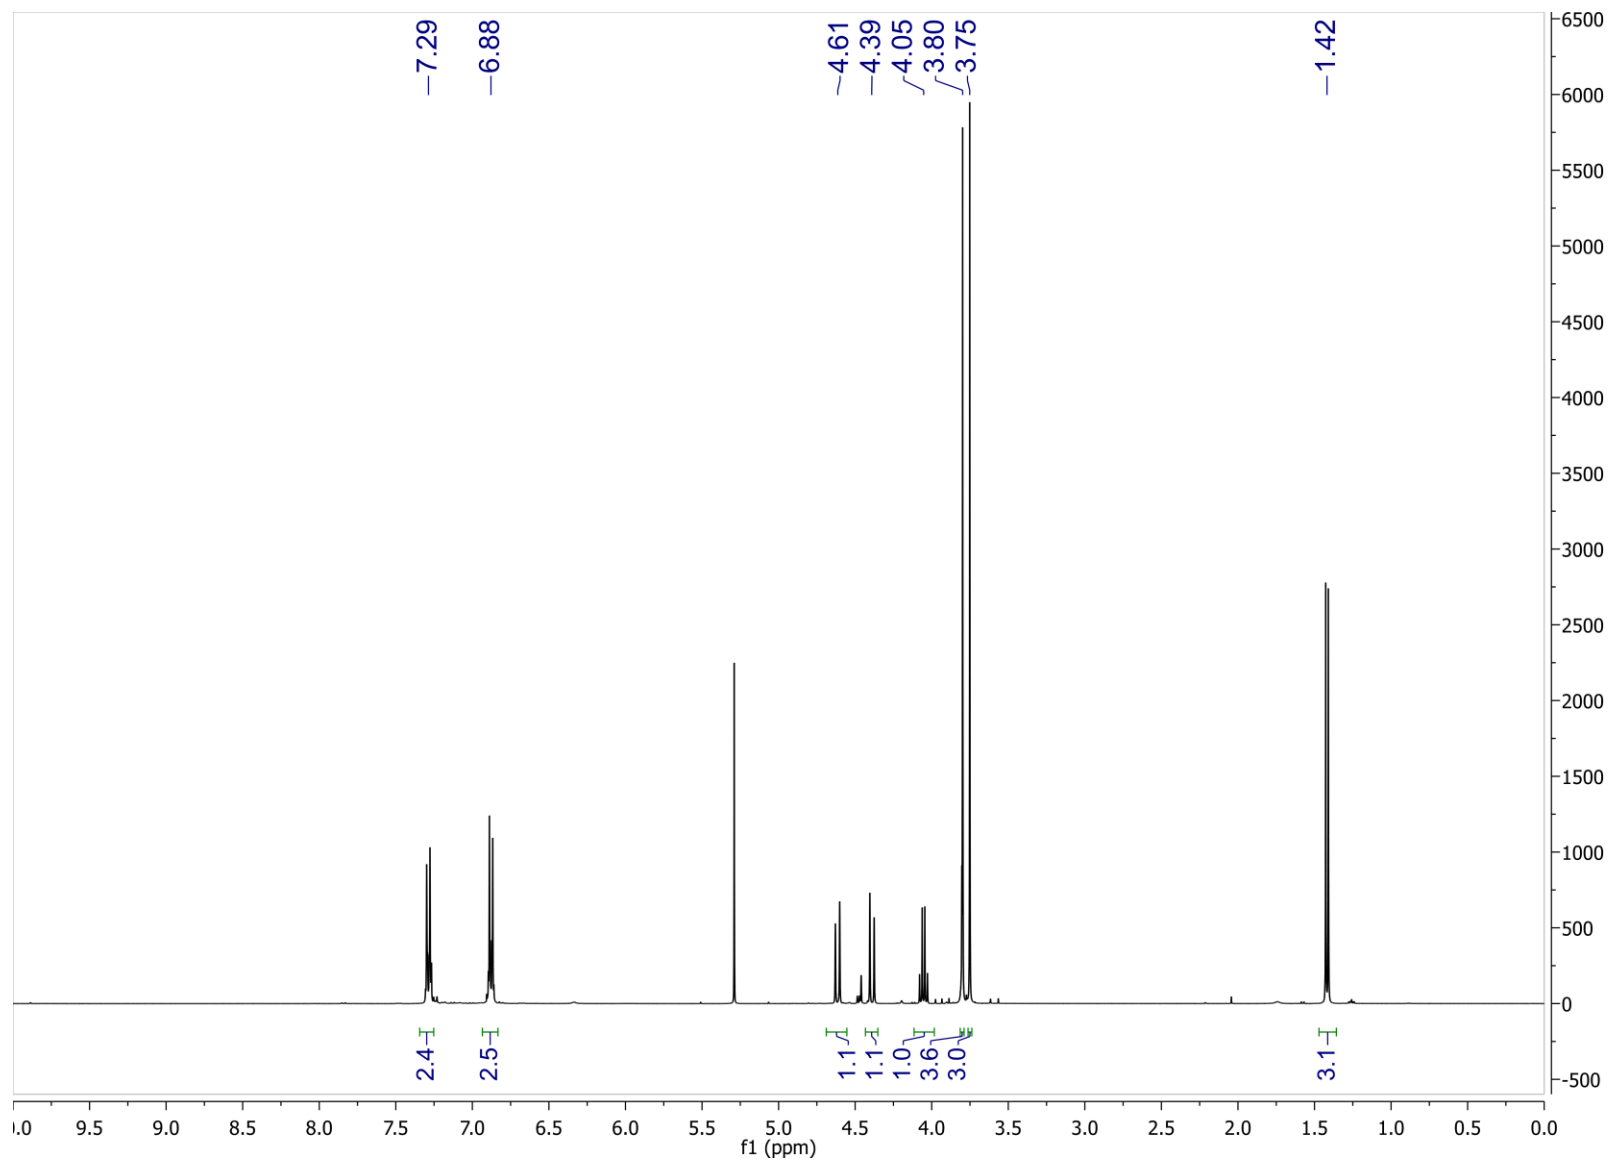

**Figure S15:**  $^{13}\text{C}$  NMR spectrum of synthetic (*R*)-Methyl 2-(4-methoxybenzyloxy) propanoate (**15**) in  $\text{CDCl}_3$ .

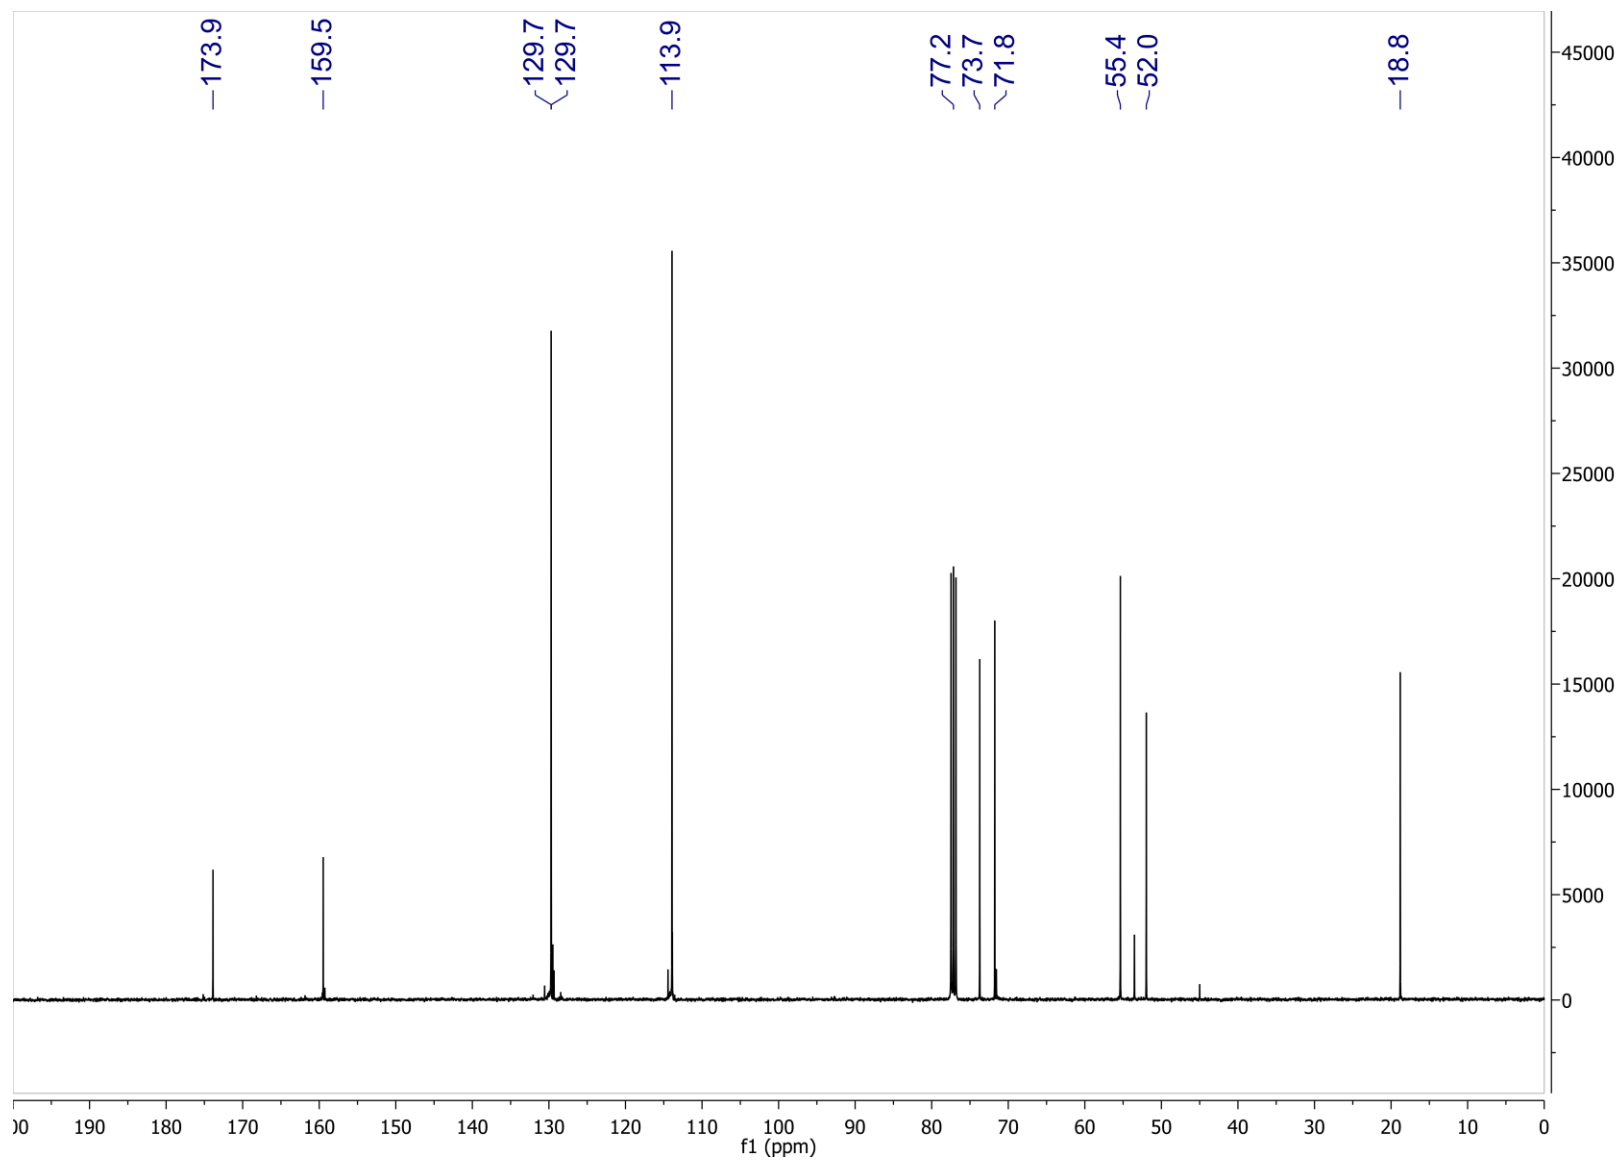

**Figure S16:**  $^1\text{H}$  NMR spectrum of (*R*)-2-(4-Methoxybenzyloxy)propanal (**16**) in  $\text{CDCl}_3$ .

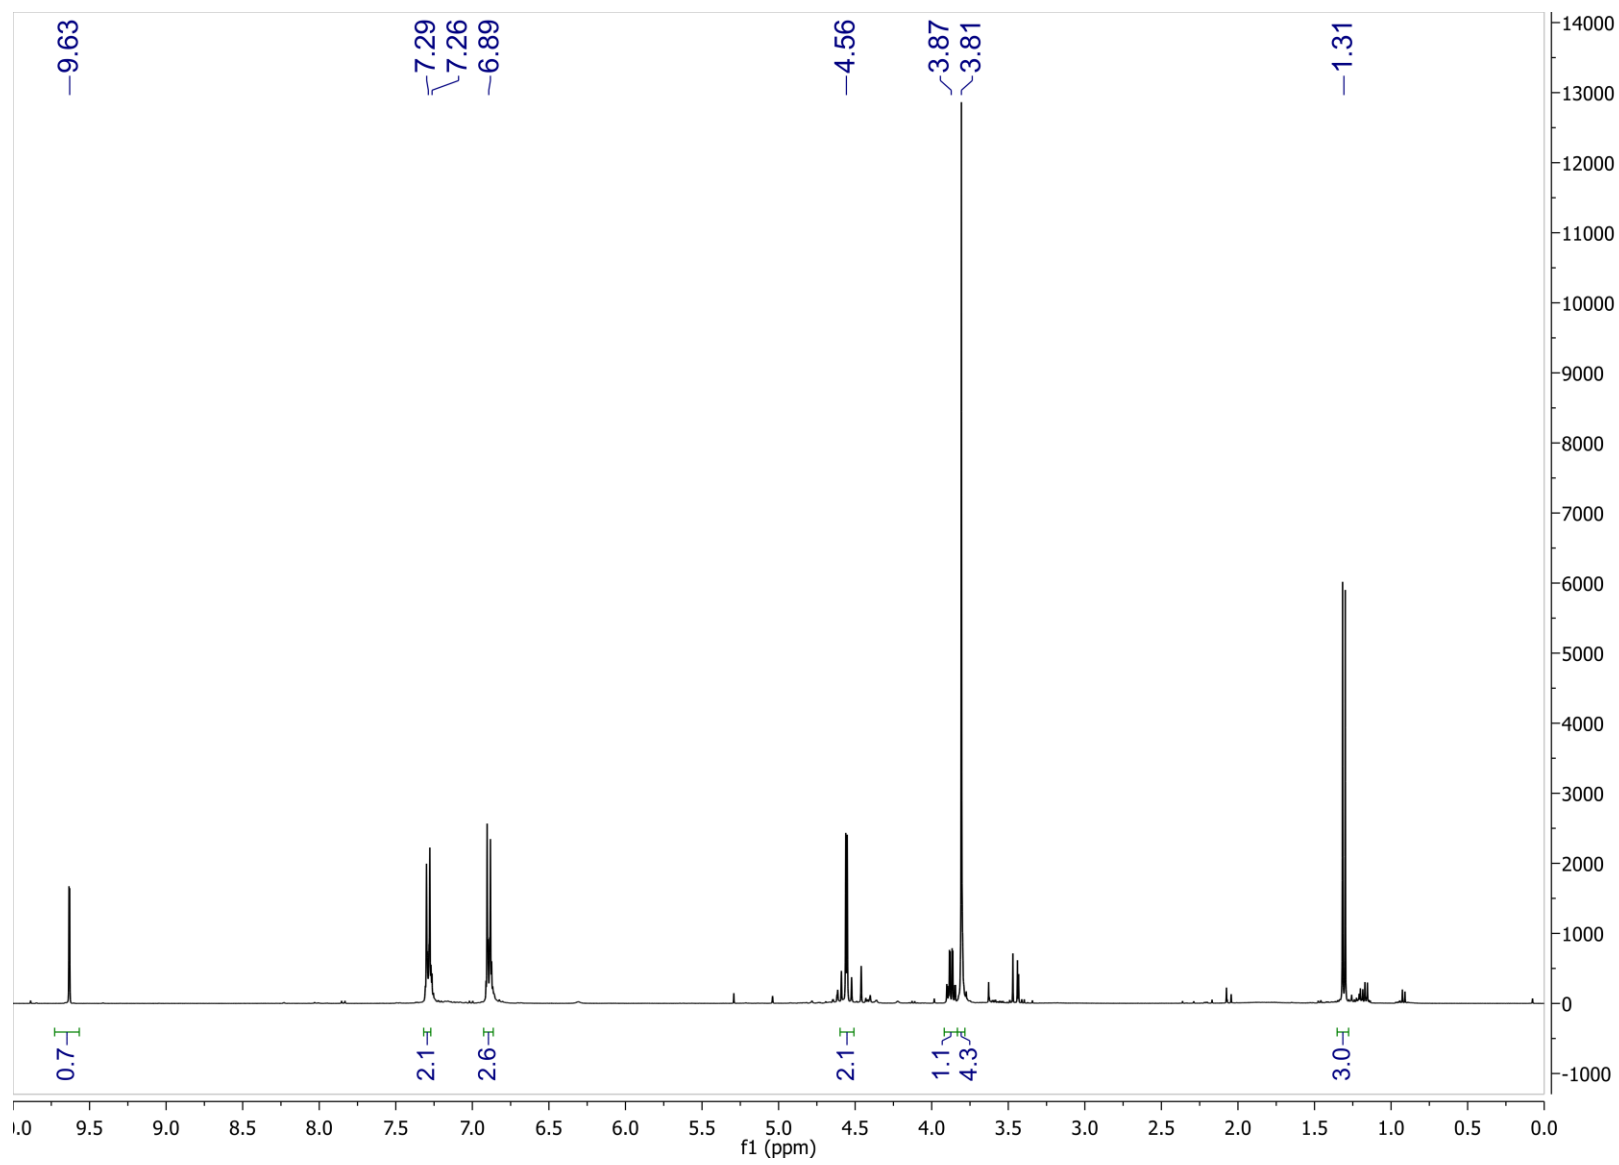

**Figure S17:**  $^{13}\text{C}$  NMR spectrum of synthetic (*R*)-2-(4-Methoxybenzyloxy)propanal (**16**) in  $\text{CDCl}_3$ .

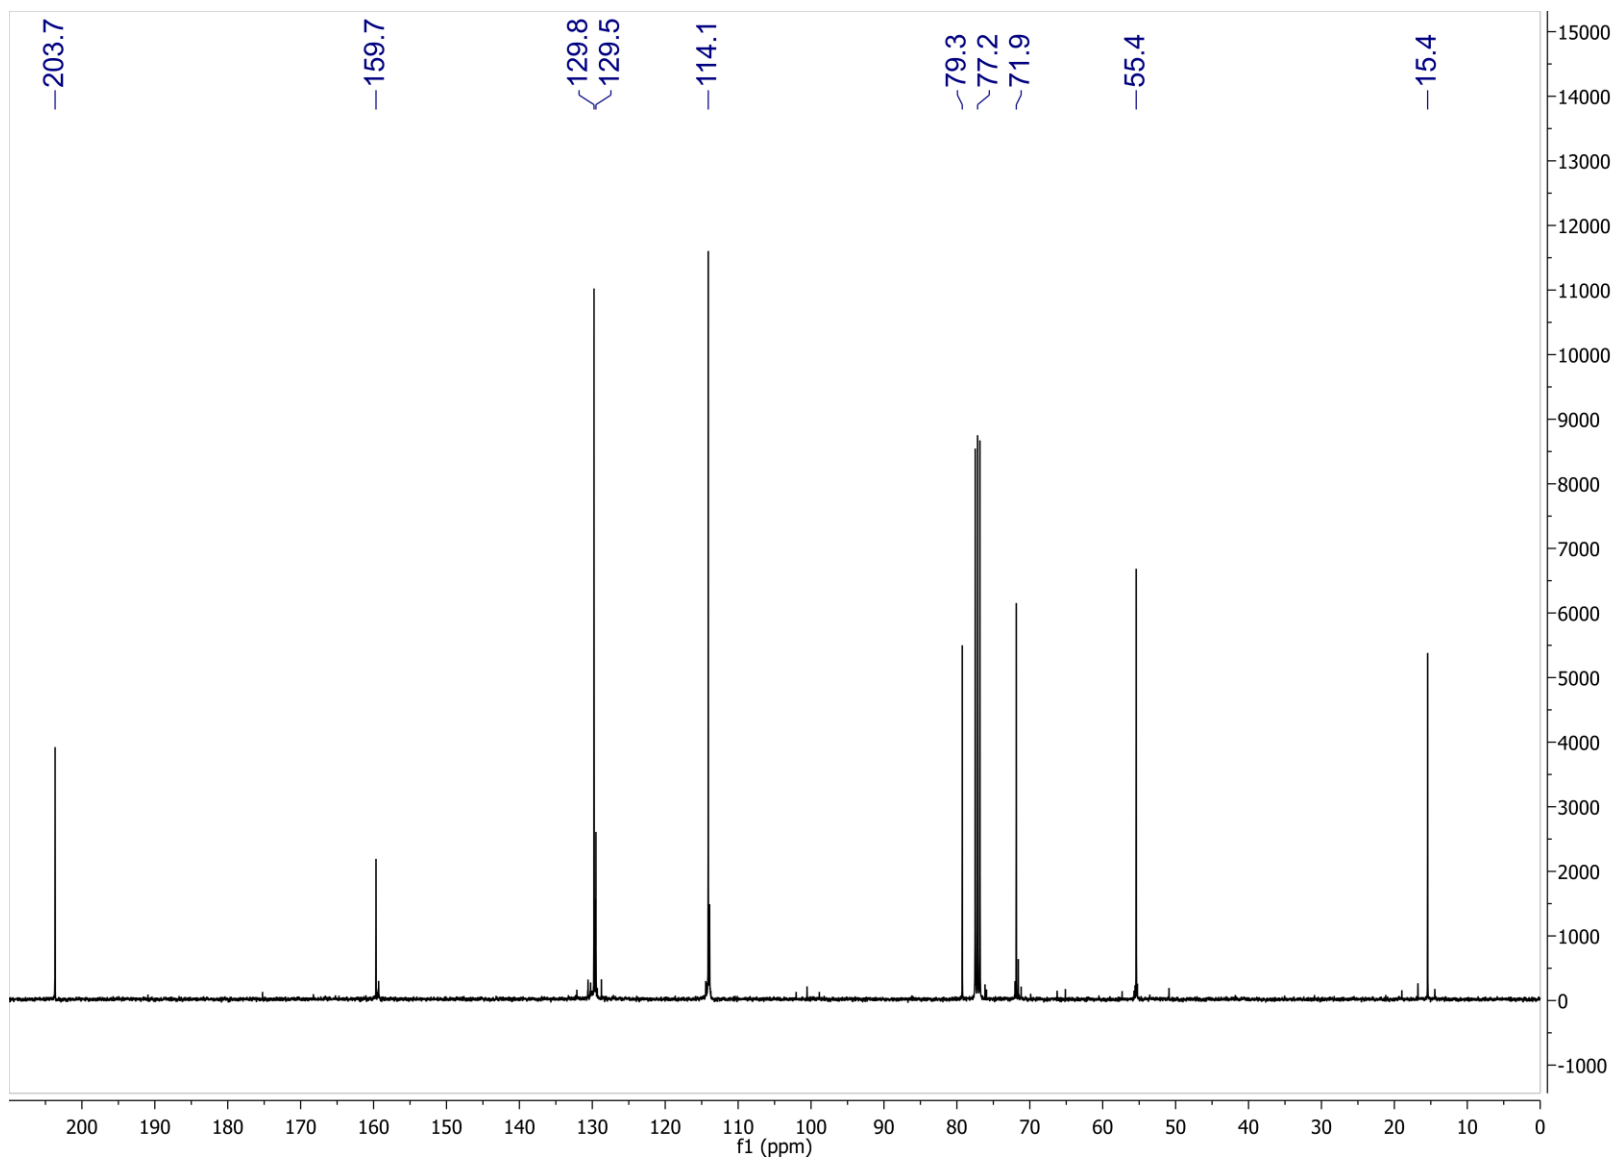

**Figure S18:**  $^1\text{H}$  NMR spectrum of synthetic (2*R*,3*R*)-*threo*-3-Hydroxy-2-(4-methoxybenzyloxy)-7-octene (**17**) in  $\text{CDCl}_3$ .

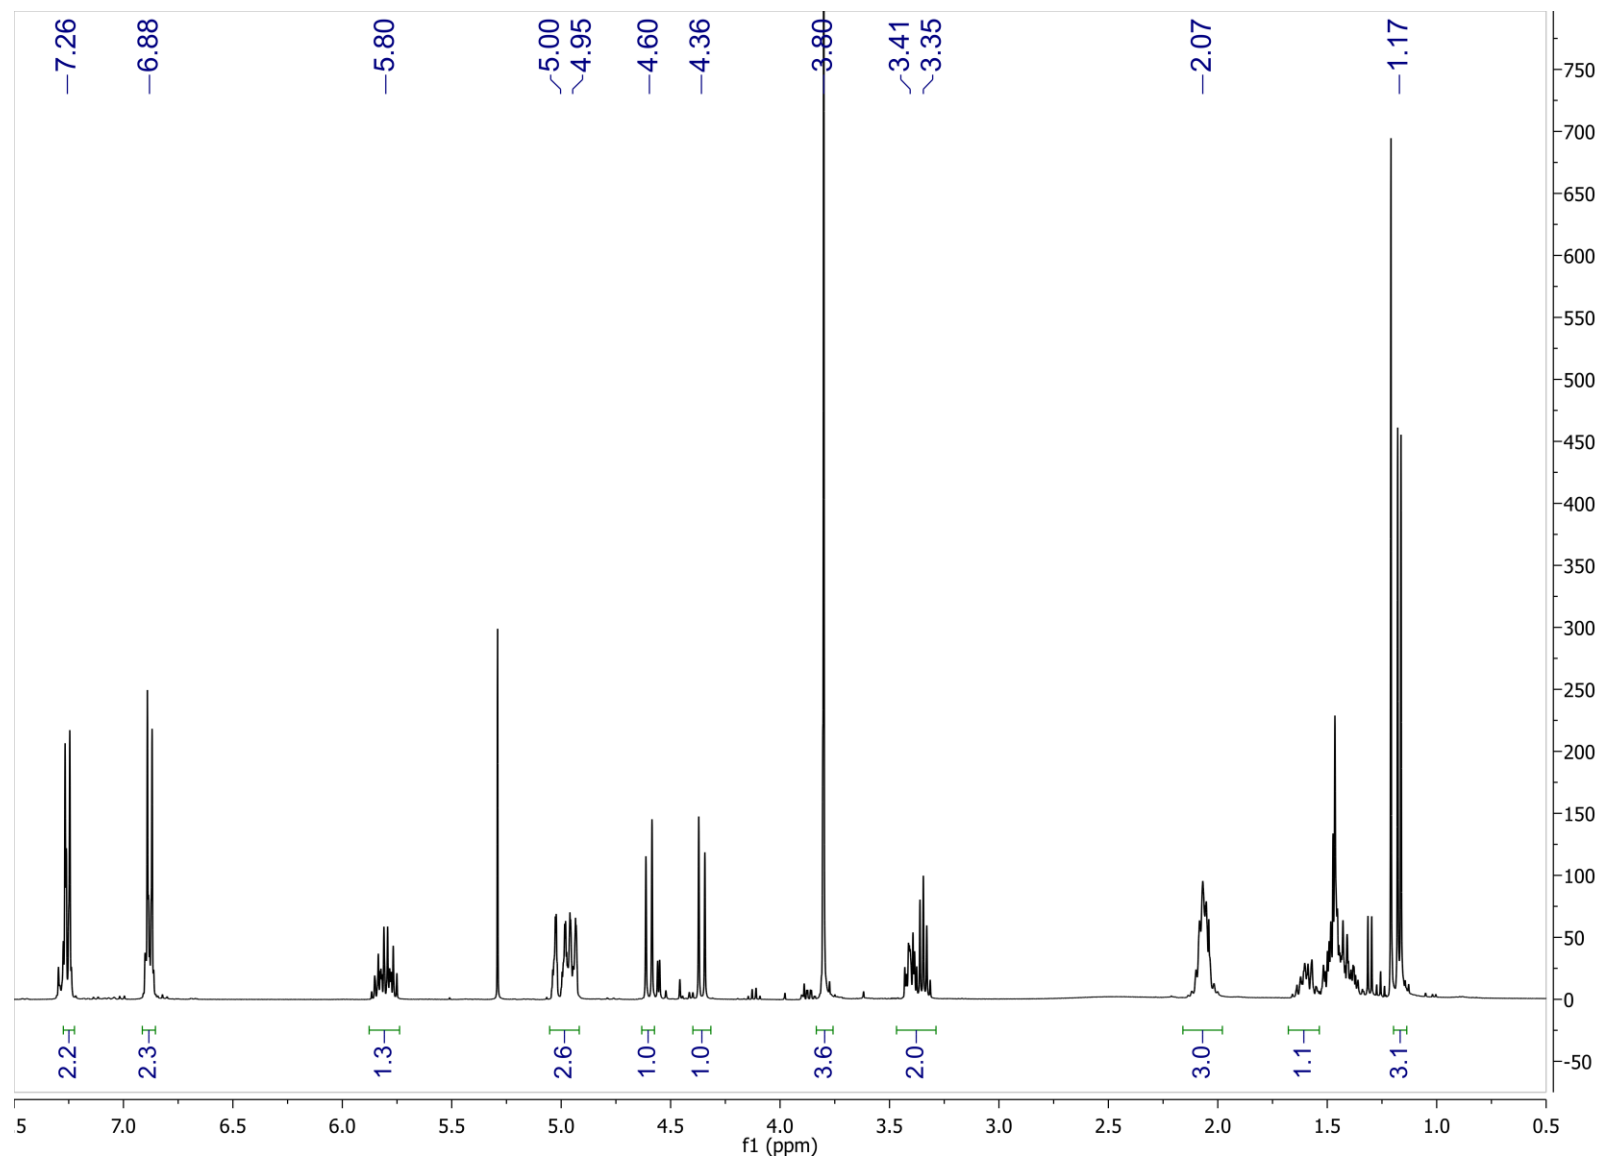

**Figure S19:**  $^{13}\text{C}$  NMR spectrum of synthetic (2*R*,3*R*)-*threo*-3-Hydroxy-2-(4-methoxybenzyloxy)-7-octene (**17**) in  $\text{CDCl}_3$ .

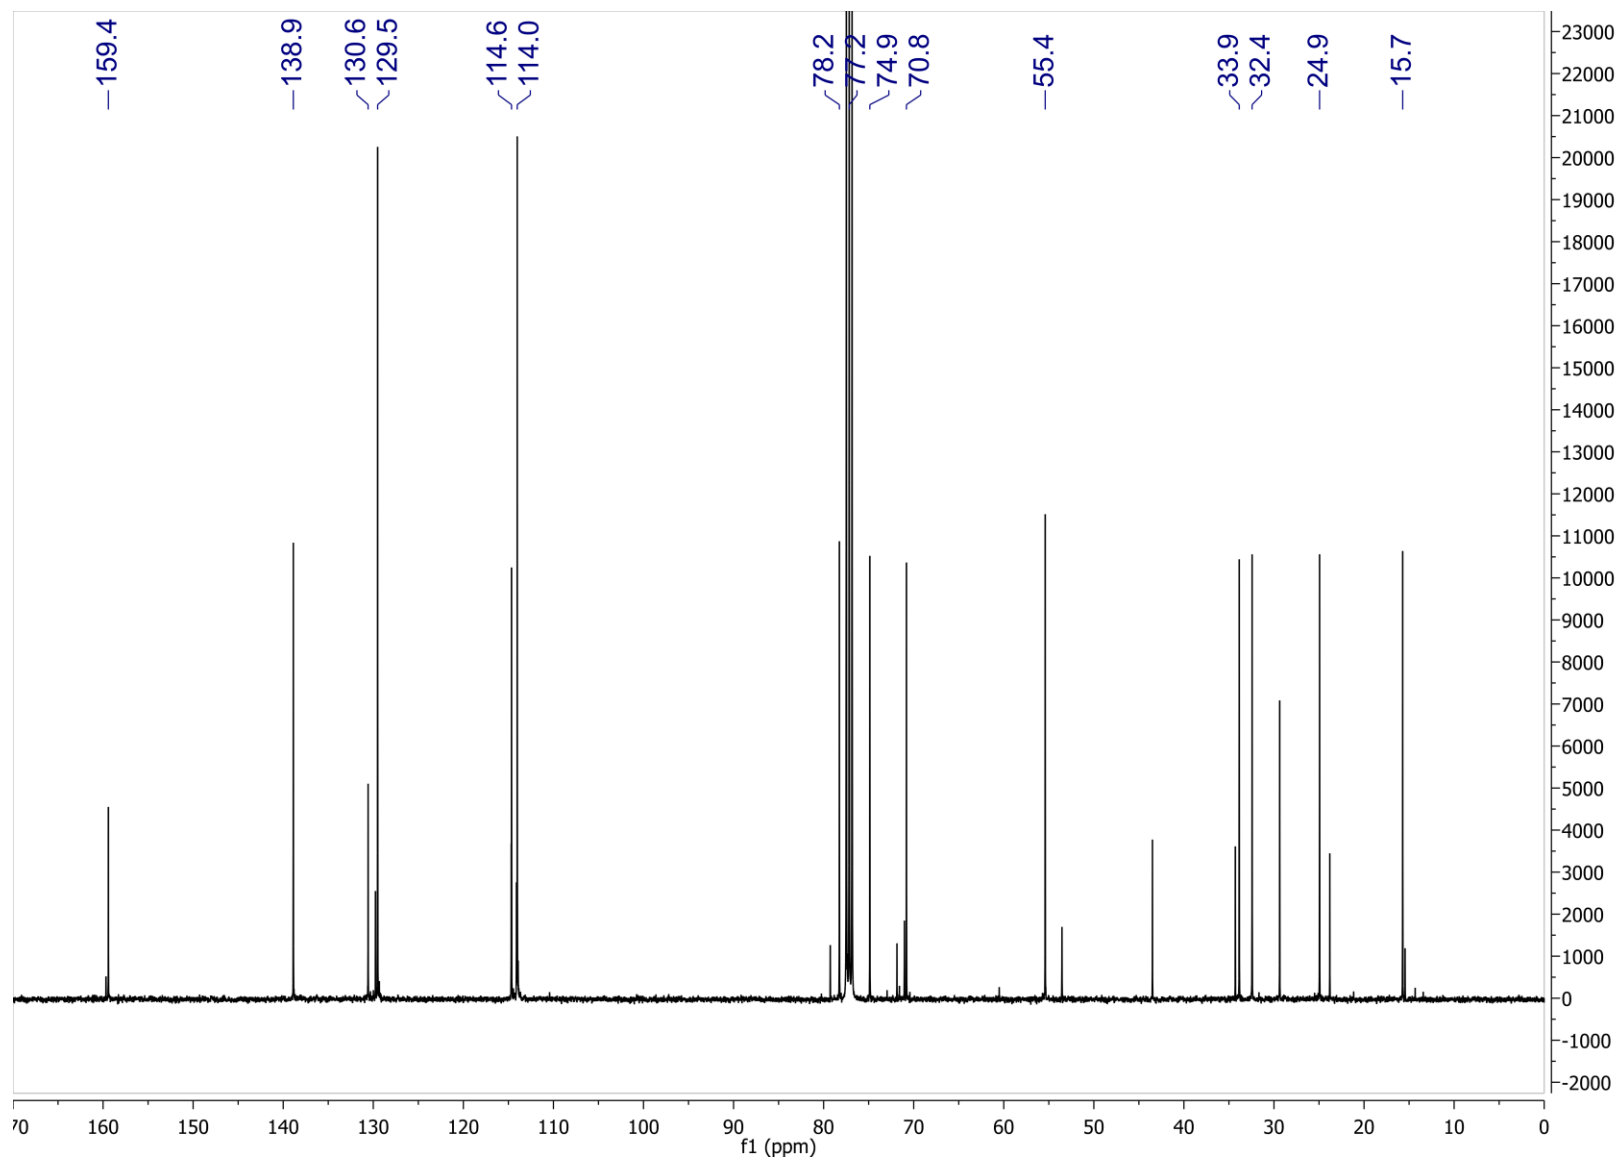



**Figure S20:** HSQC spectrum of synthetic (2*R*,3*R*)-*threo*-3-Hydroxy-2-(4-methoxybenzyloxy)-7-octene (**17**) in CDCl<sub>3</sub>.

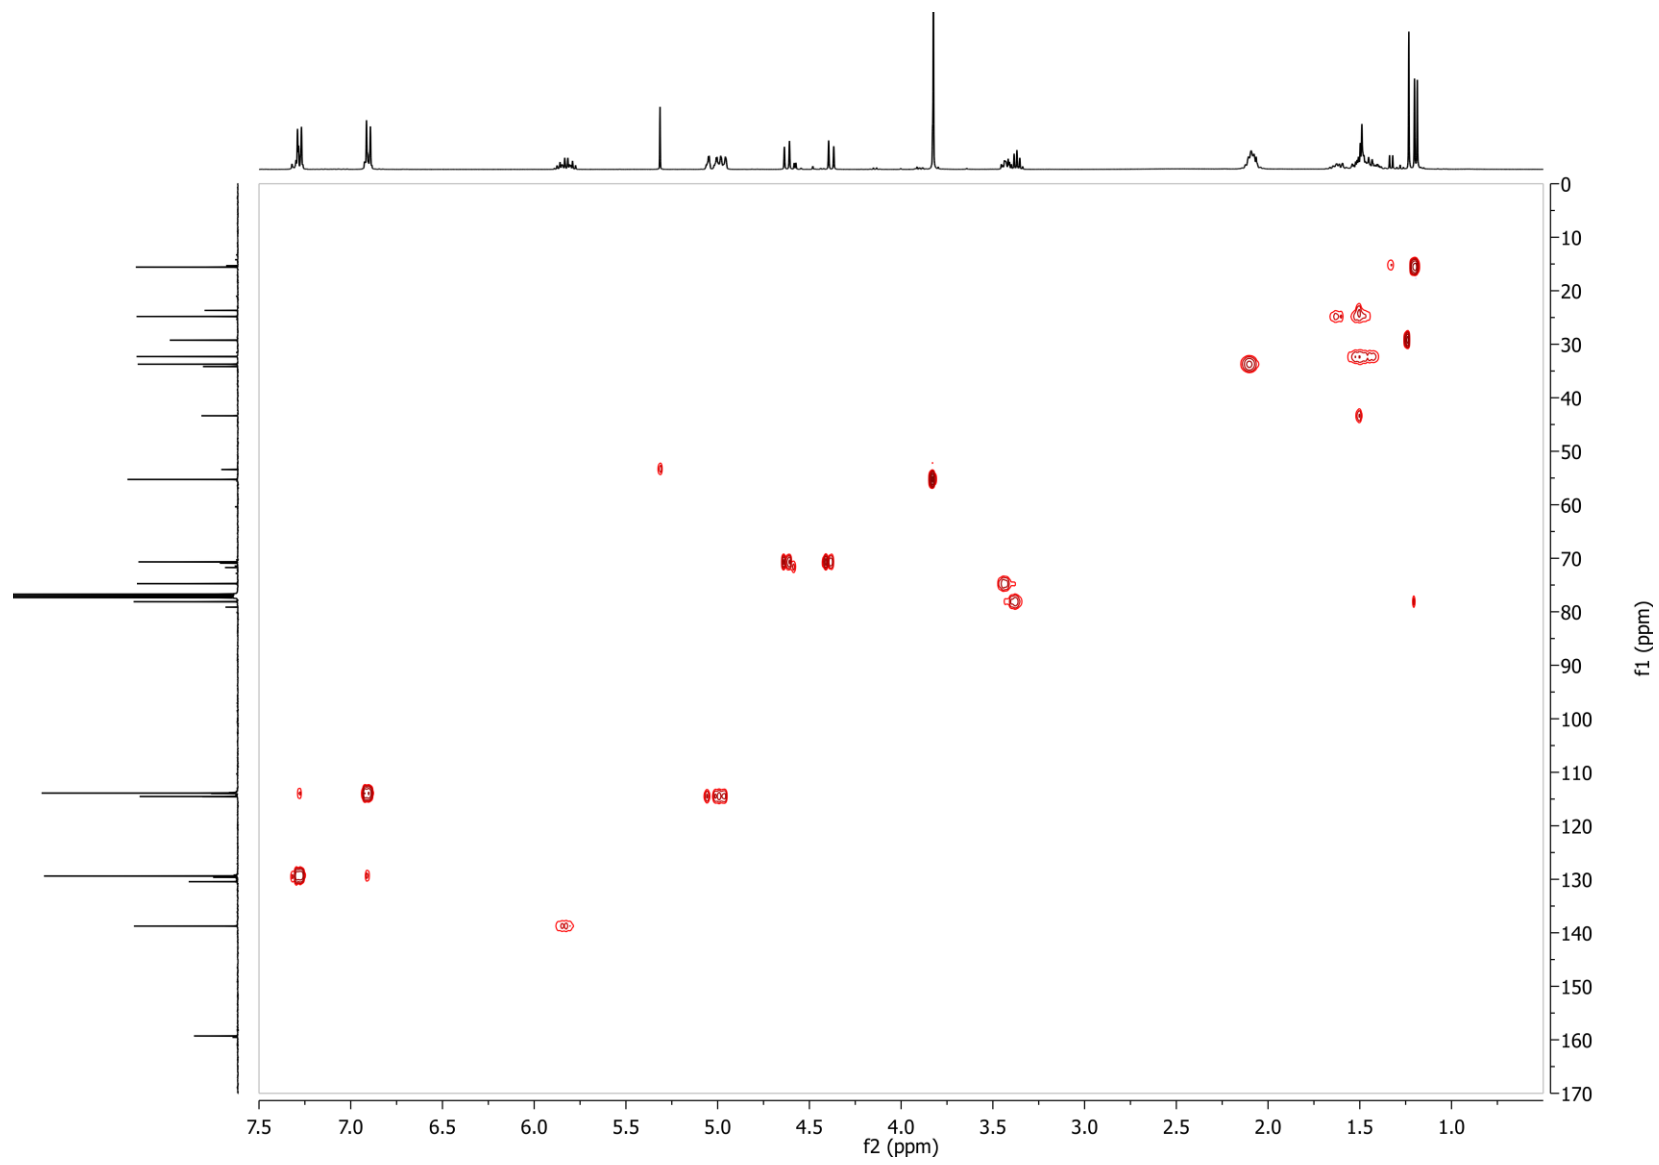

**Figure S21:**  $^1\text{H}$  NMR spectrum of synthetic (2*R*,3*R*)-*threo*-3-Benzoyloxy-2-(4-methoxybenzyloxy)-7-octene (**18a**) in  $\text{CDCl}_3$ .

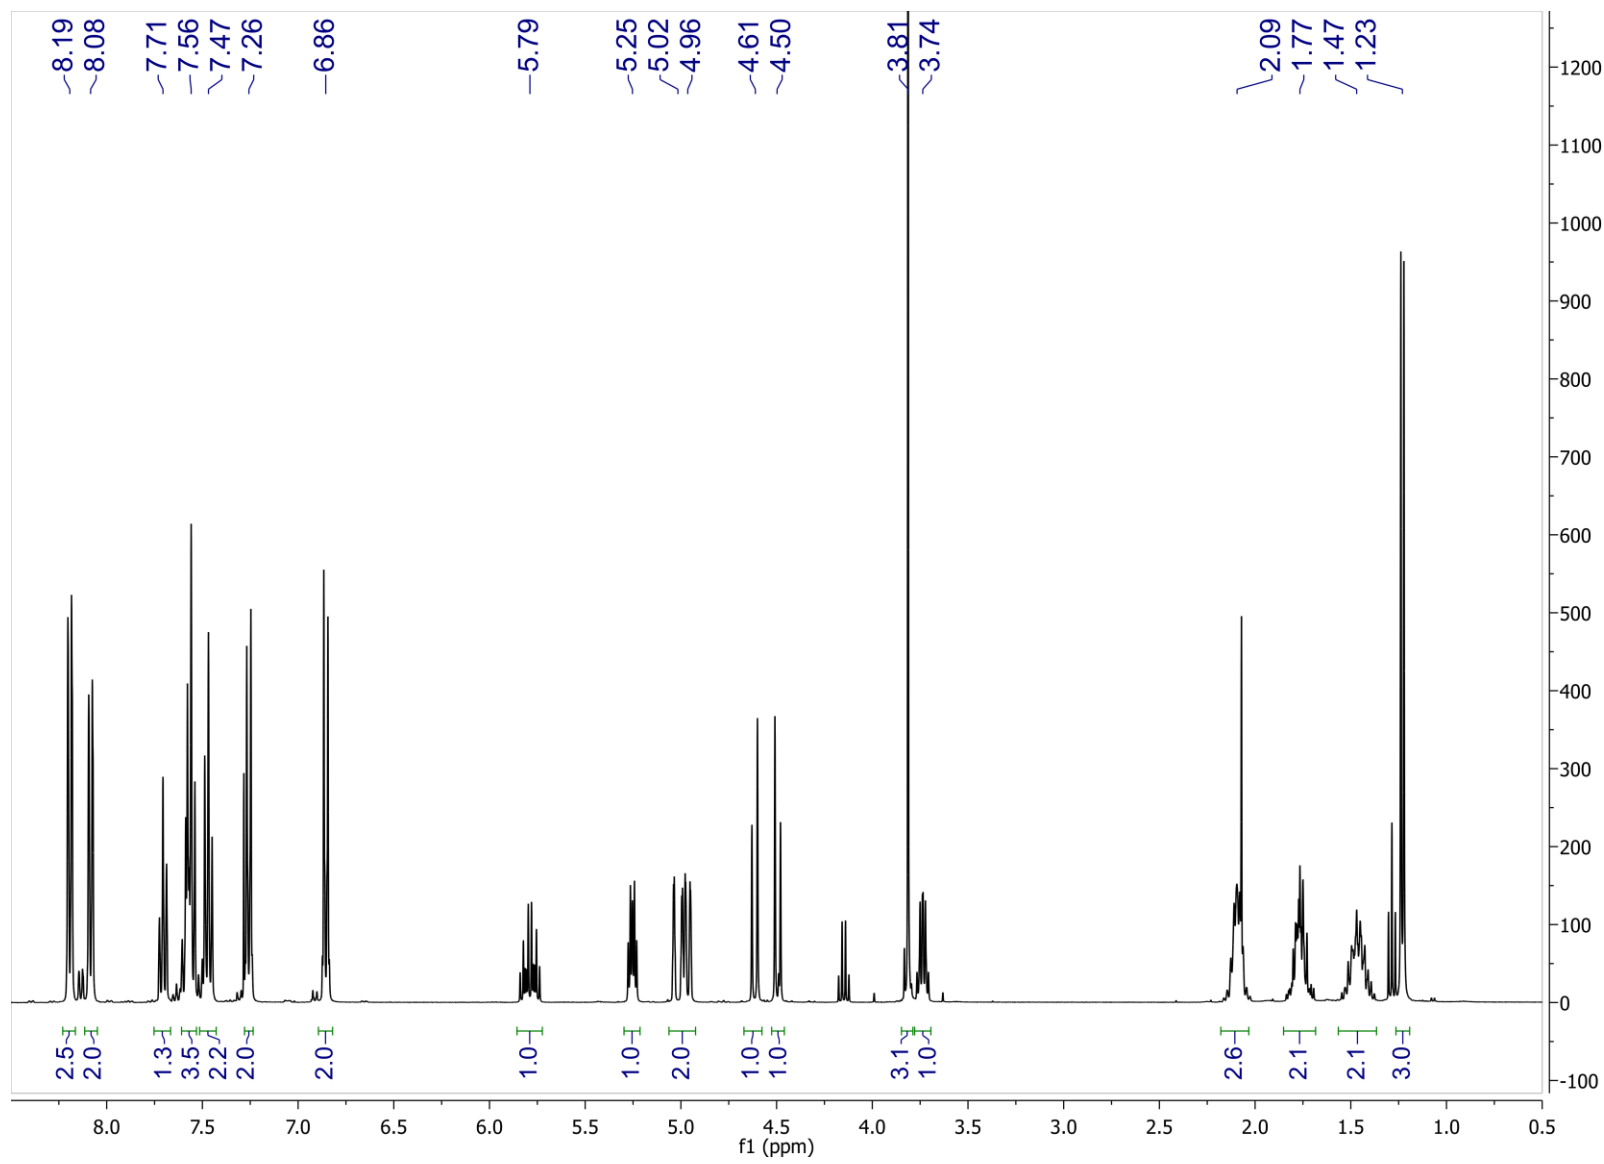

**Figure S22:**  $^{13}\text{C}$  NMR spectrum of synthetic (2*R*,3*R*)-*threo*-3-Benzoyloxy-2-(4-methoxybenzyloxy)-7-octene (**18a**) in  $\text{CDCl}_3$ .

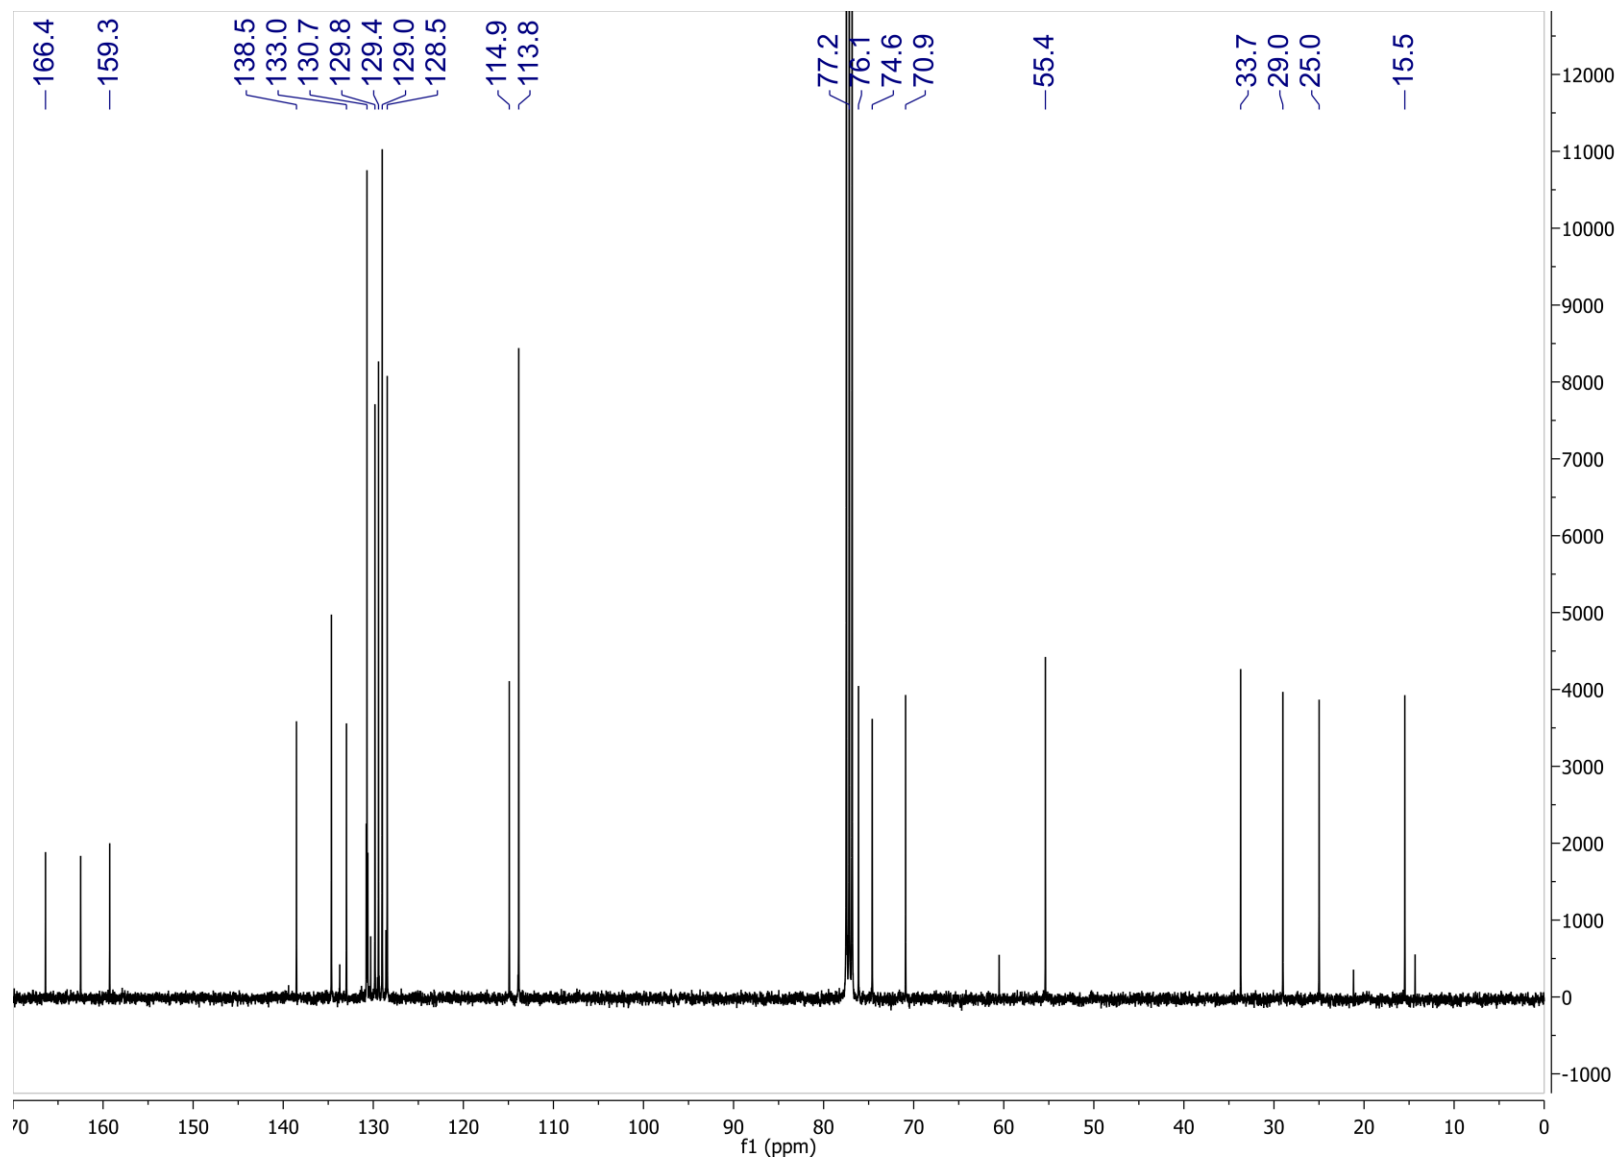

**Figure S23:**  $^1\text{H}$  NMR spectrum of synthetic (2*R*,3*S*)-*erythro*-3-Benzoyloxy-2-(4-methoxybenzyloxy)-7-octene (**18b**) in  $\text{CDCl}_3$ .

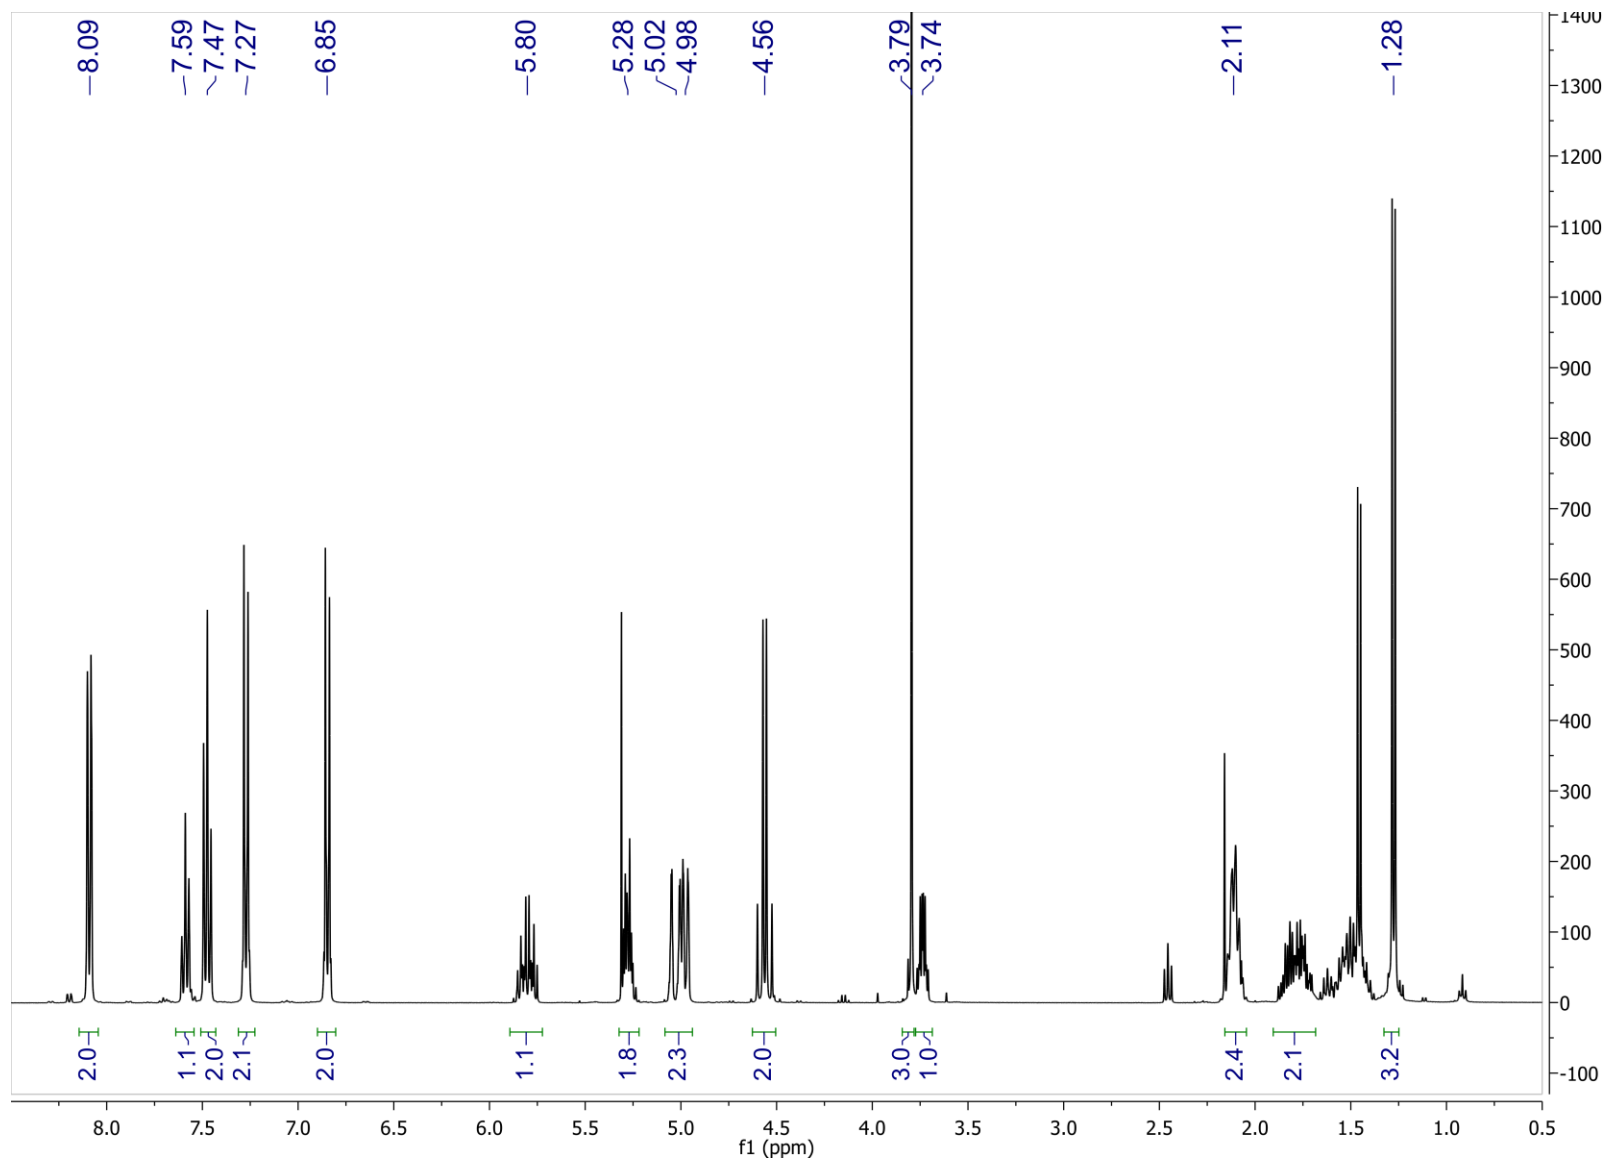

**Figure S24:**  $^{13}\text{C}$  NMR spectrum of synthetic (2*R*,3*S*)-erythro-3-Benzoyloxy-2-(4-methoxybenzyloxy)-7-octene (**18b**) in  $\text{CDCl}_3$ .

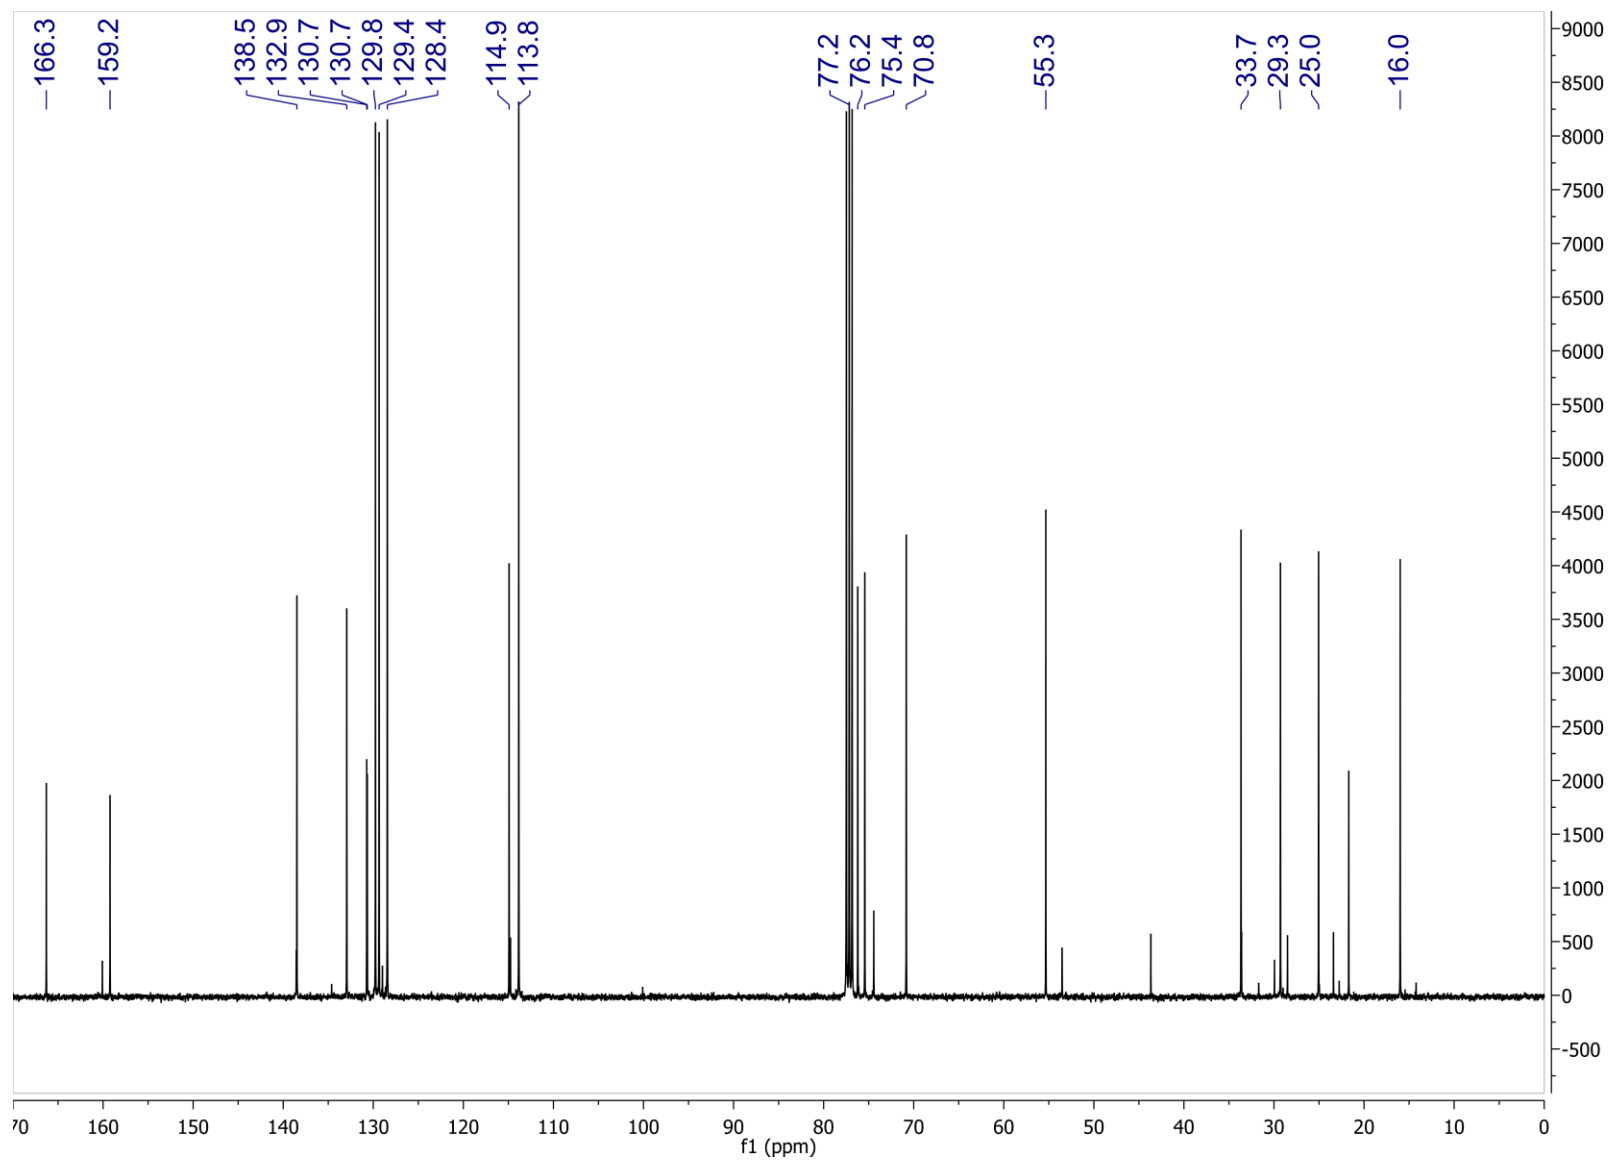

**Figure S25:**  $^1\text{H}$  NMR spectrum of synthetic (7*R*,8*R*,2*E*)-*threo*-Ethyl 7-benzoyloxy-8-(4-methoxybenzyloxy)-2-nonenoate (**19a**) in  $\text{CDCl}_3$ .

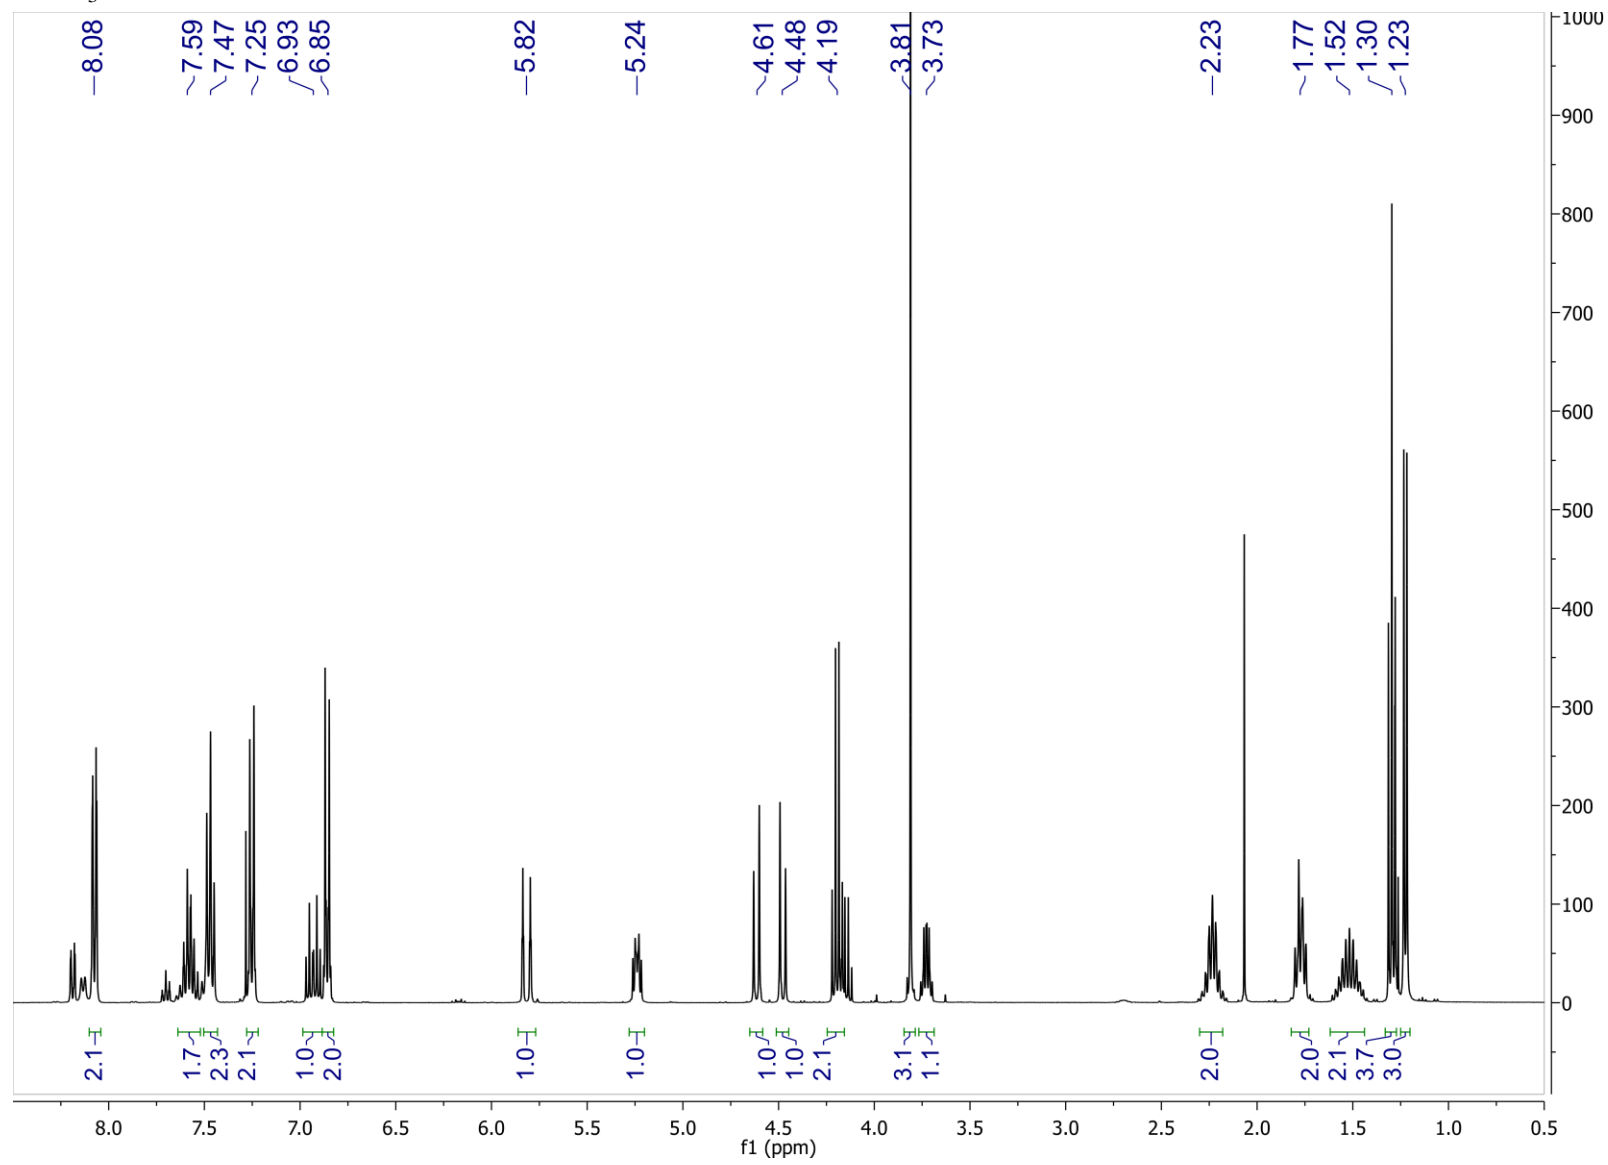

**Figure S26:**  $^{13}\text{C}$  NMR spectrum of synthetic (*7R,8R,2E*)-*threo*-Ethyl 7-benzoyloxy-8-(4-methoxybenzyloxy)-2-nonenoate (**19a**) in  $\text{CDCl}_3$ .

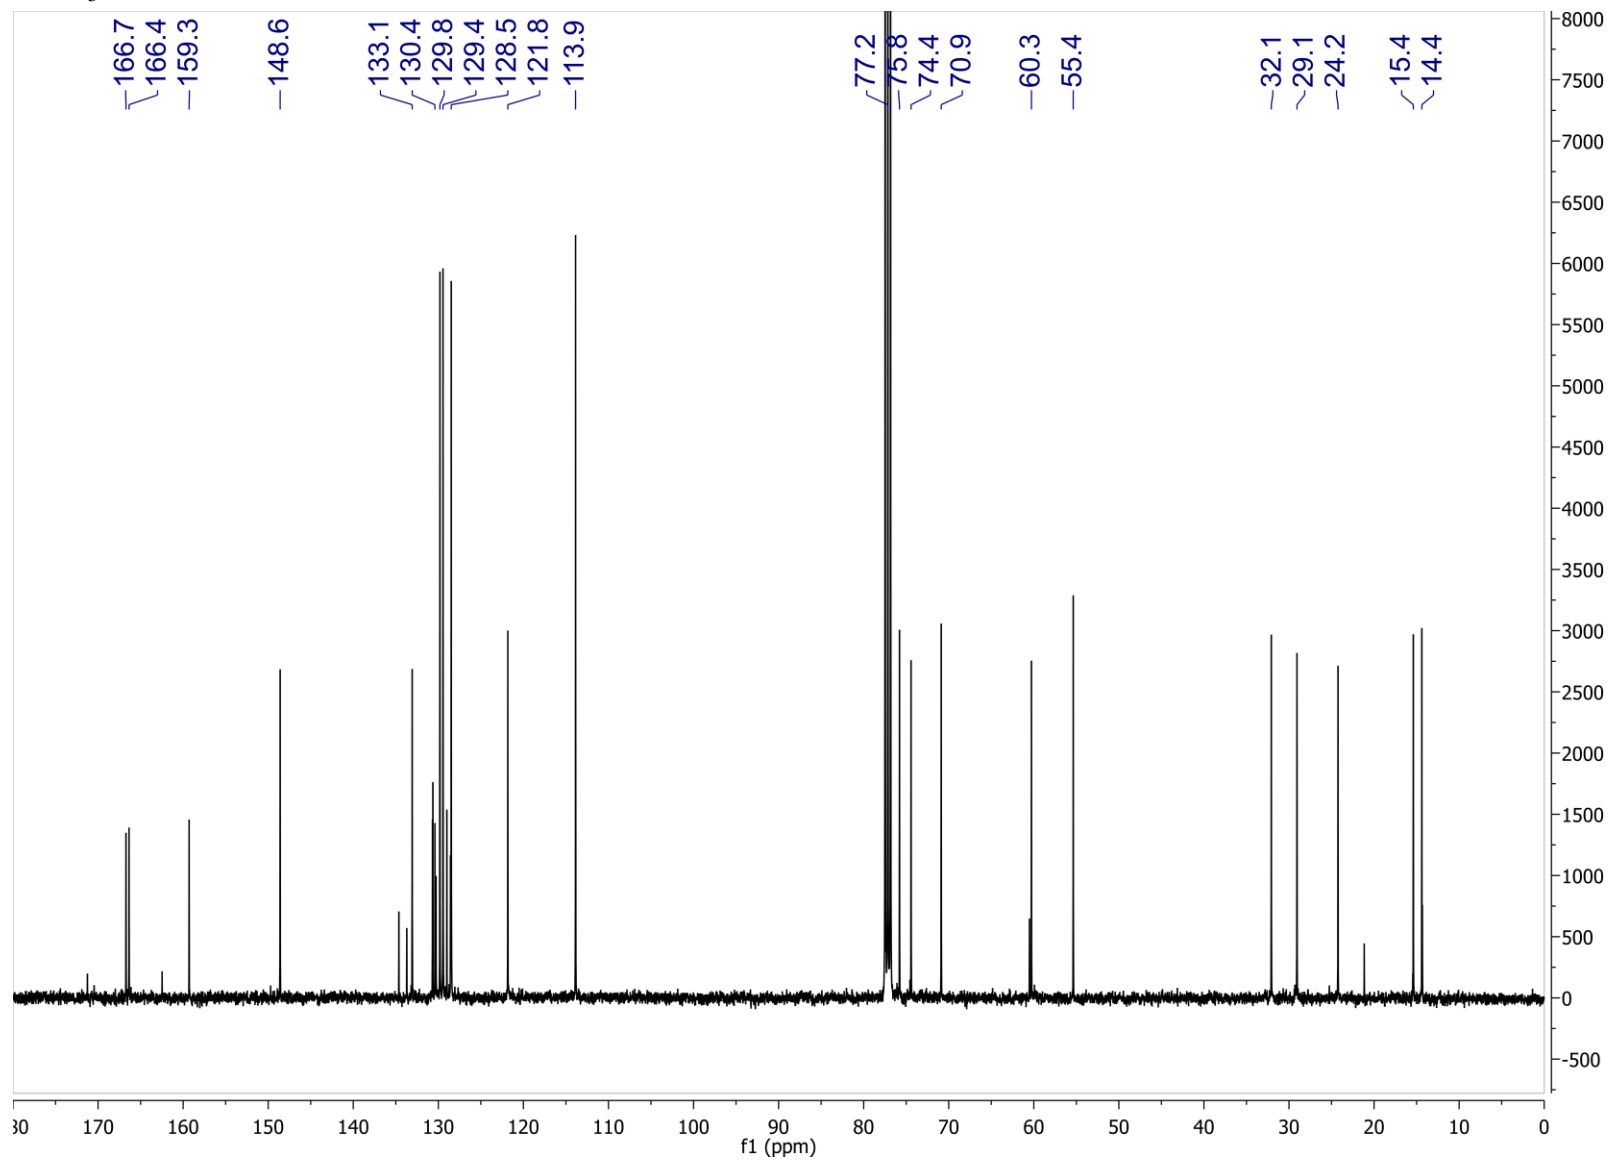

**Figure S27:** HSQC spectrum of synthetic (*7R,8R,2E*)-*threo*-Ethyl 7-benzoyloxy-8-(4-methoxybenzyloxy)-2-nonenoate (**19a**) in CDCl<sub>3</sub>.

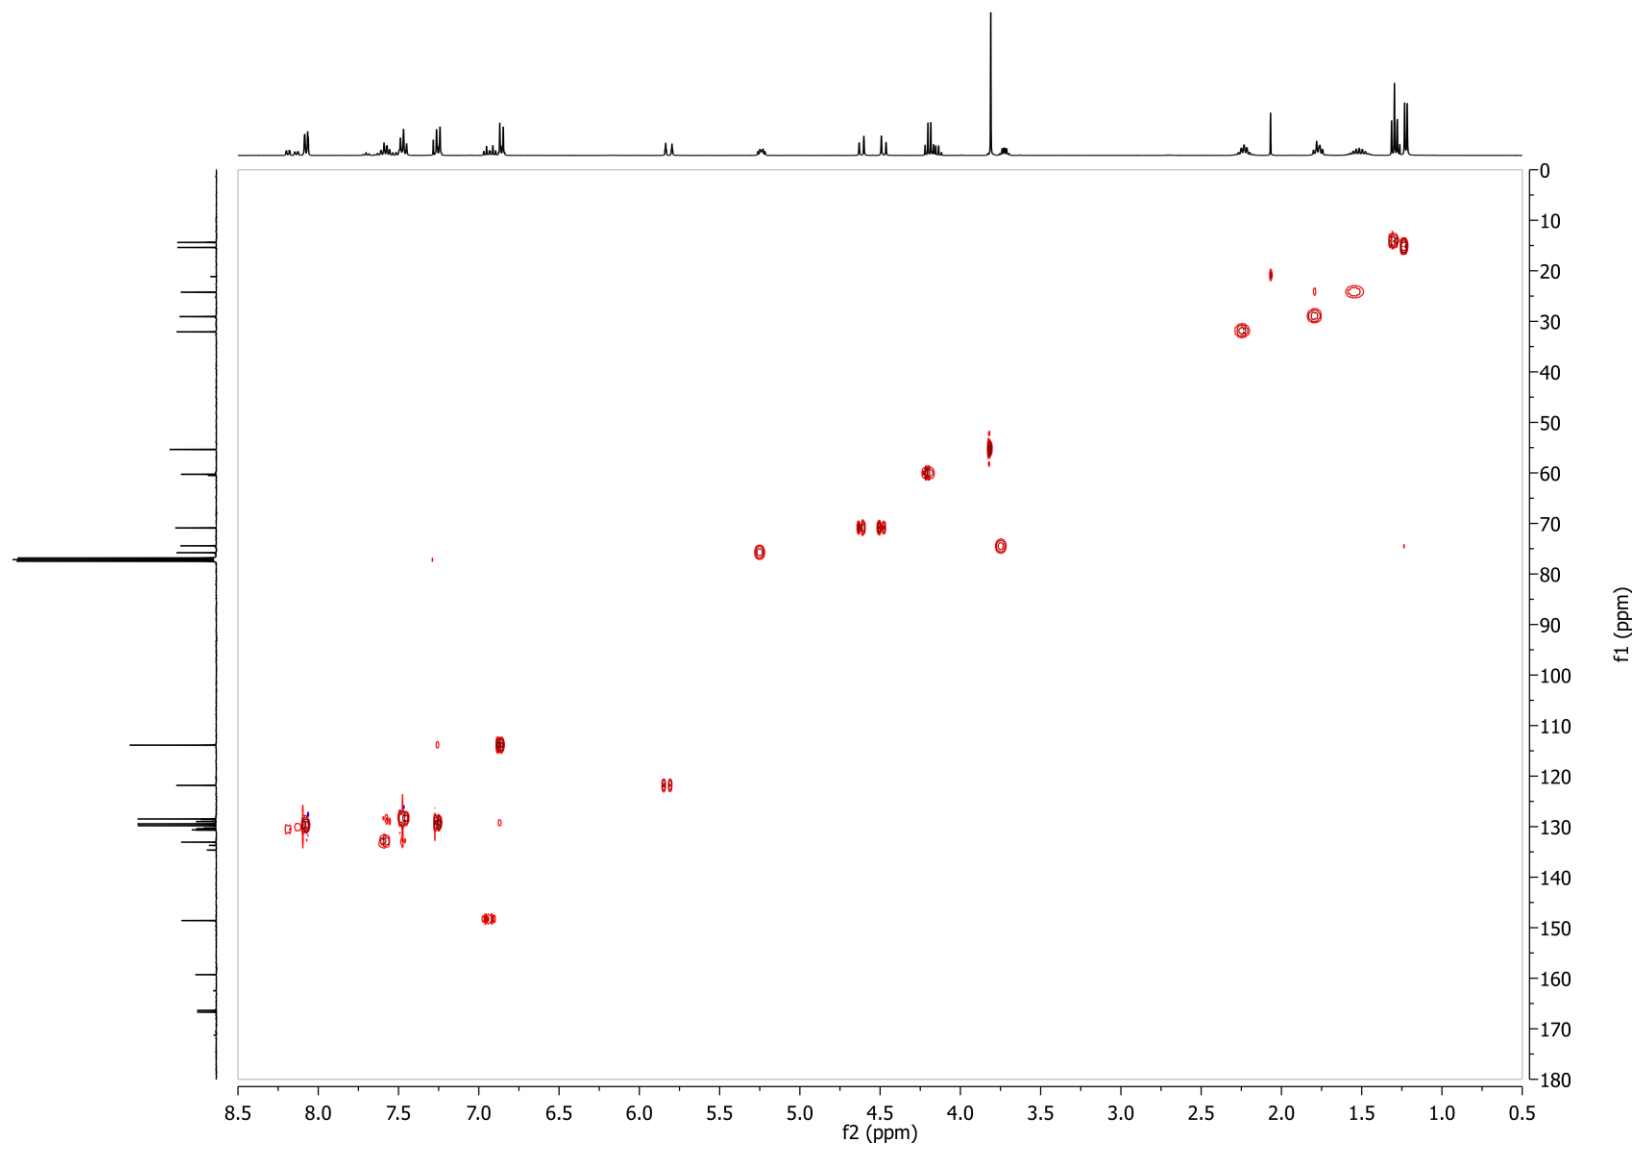



**Figure S28:**  $^1\text{H}$  NMR spectrum of synthetic (*7S,8R,2E*)-erythro-Ethyl 7-benzoyloxy-8-(4-methoxybenzyloxy)-2-nonenoate (**19b**) in  $\text{CDCl}_3$ .

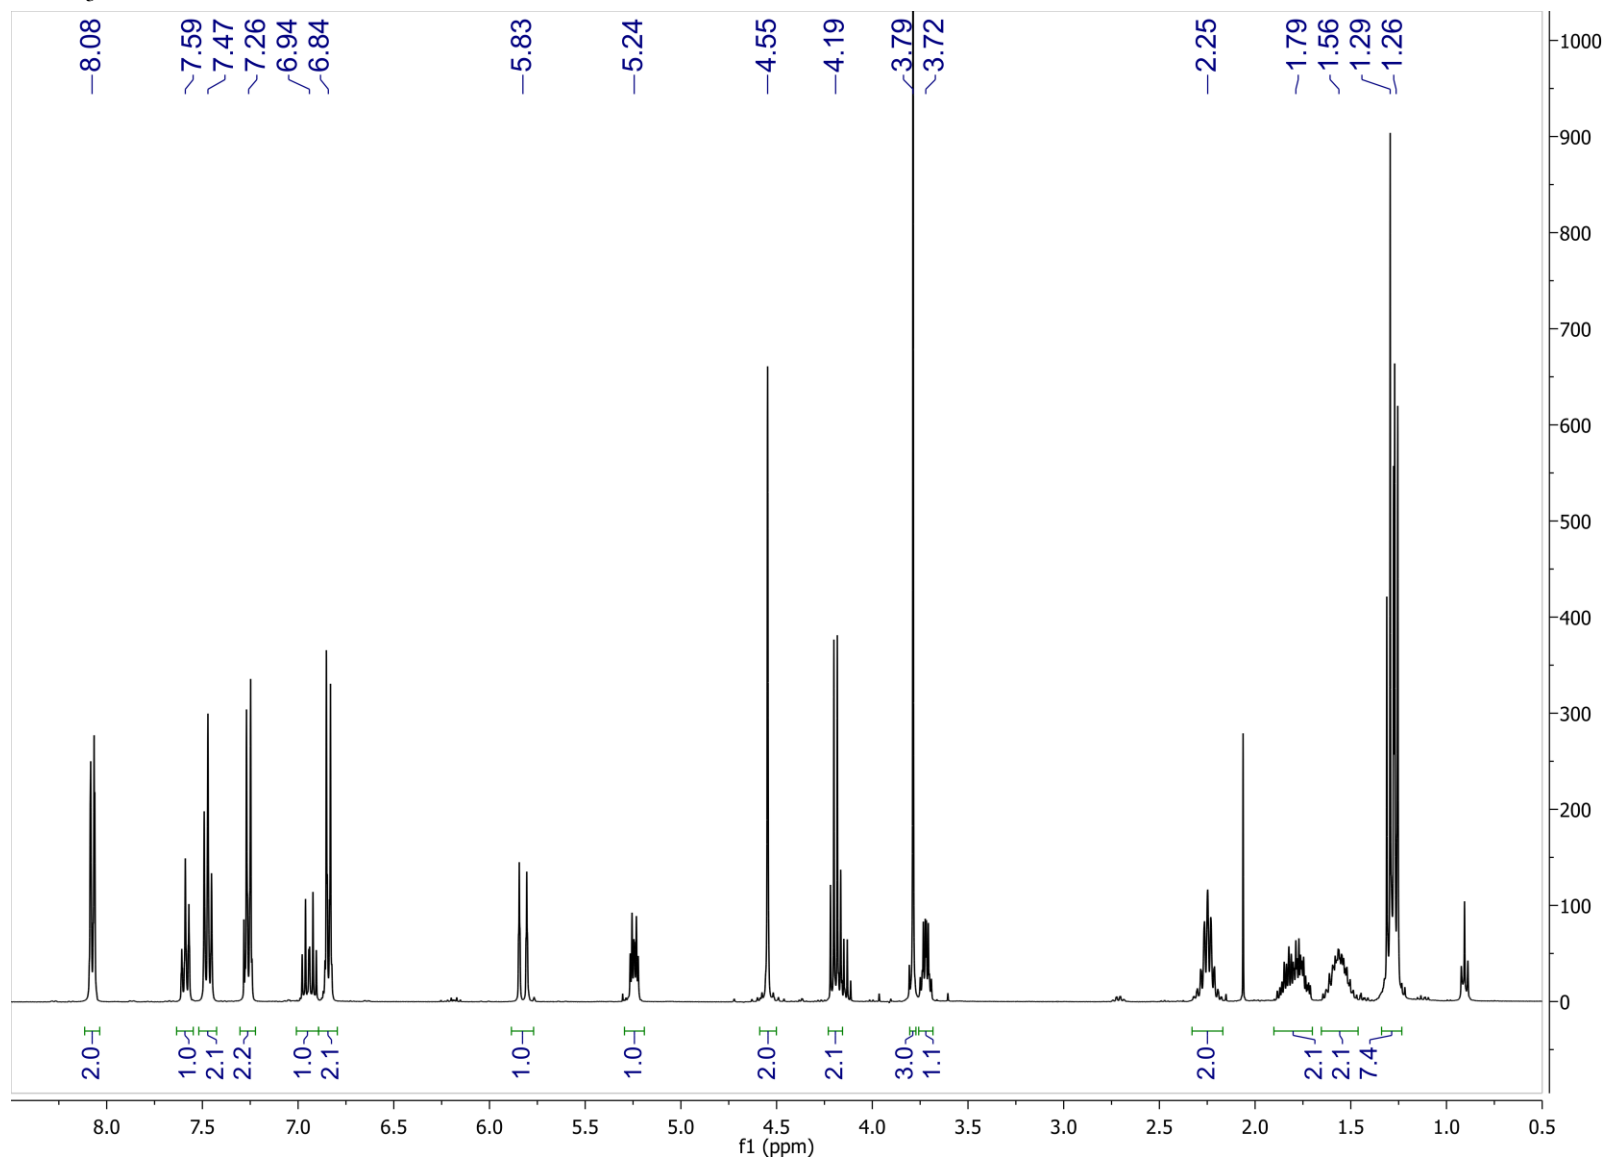

**Figure S29:**  $^{13}\text{C}$  NMR spectrum of synthetic (7*S*,8*R*,2*E*)-erythro-Ethyl 7-benzoyloxy-8-(4-methoxybenzyloxy)-2-nonenoate (**19b**) in  $\text{CDCl}_3$ .

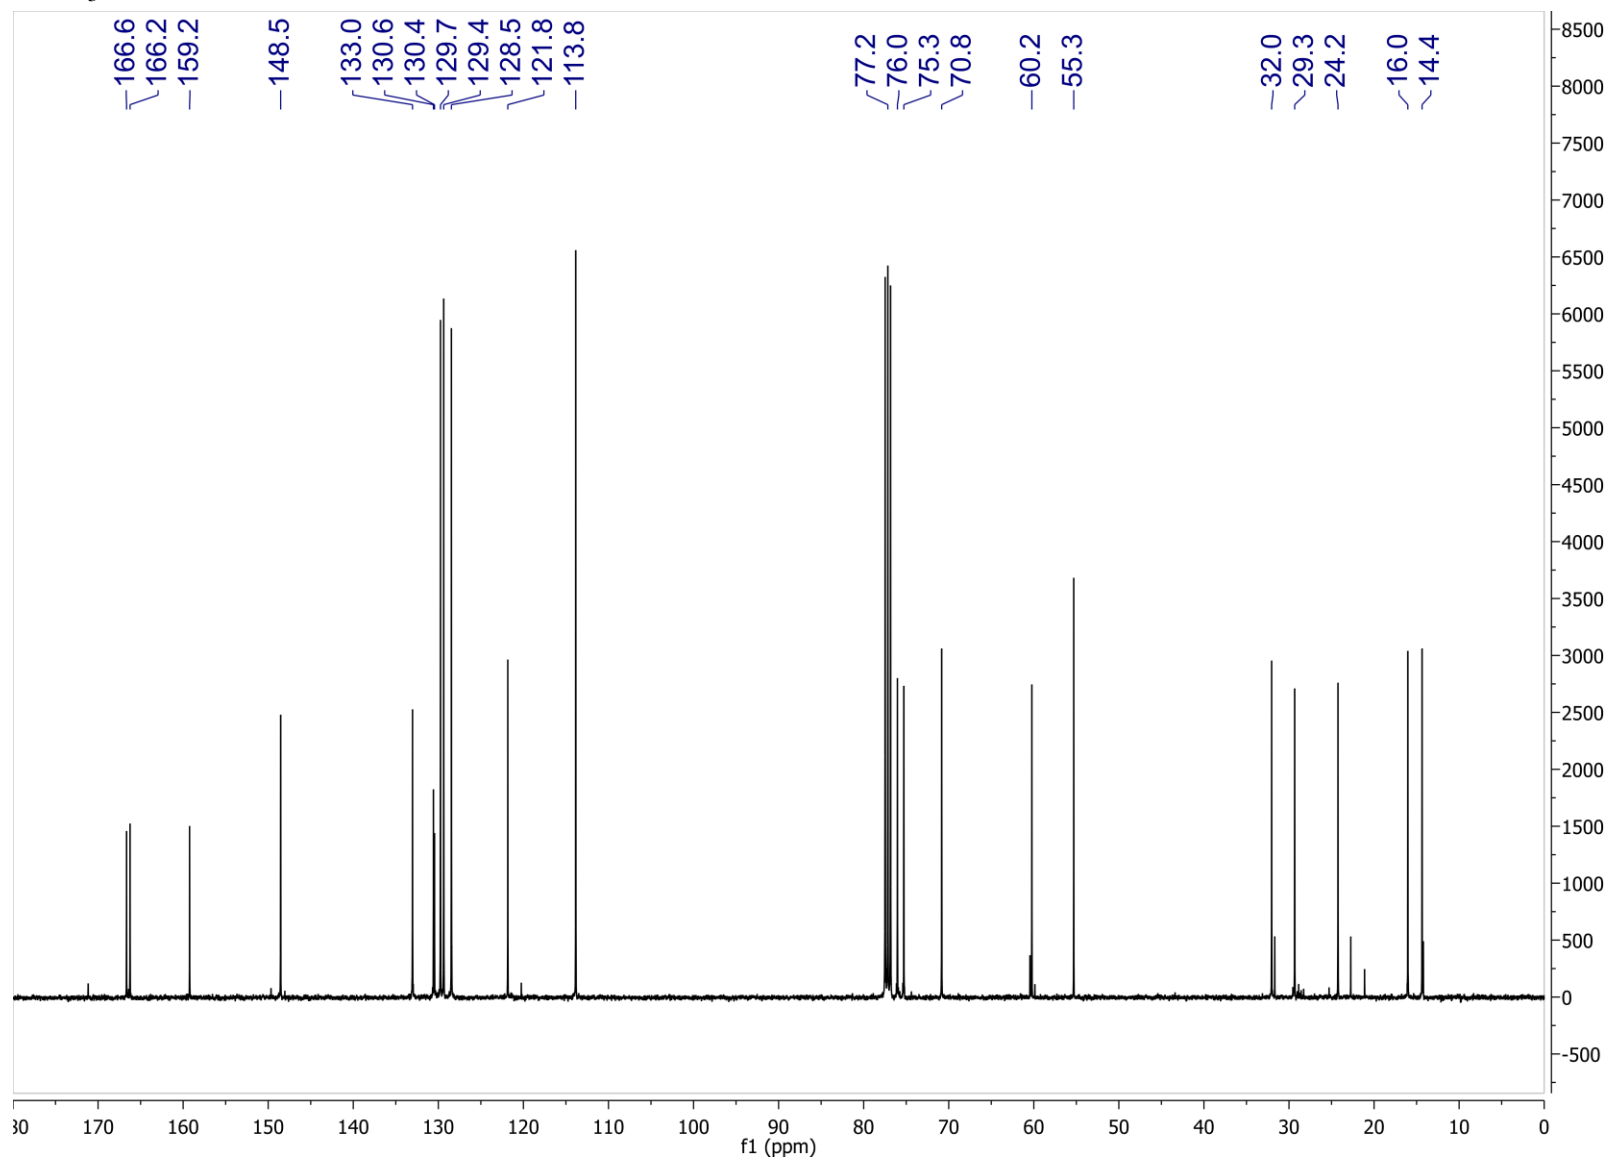

**Figure S30:** HSQC NMR spectrum of synthetic (7*S*,8*R*,2*E*)-*erythro*-Ethyl 7-benzoyloxy-8-(4-methoxybenzyloxy)-2-nonenoate (**19b**) in CDCl<sub>3</sub>.

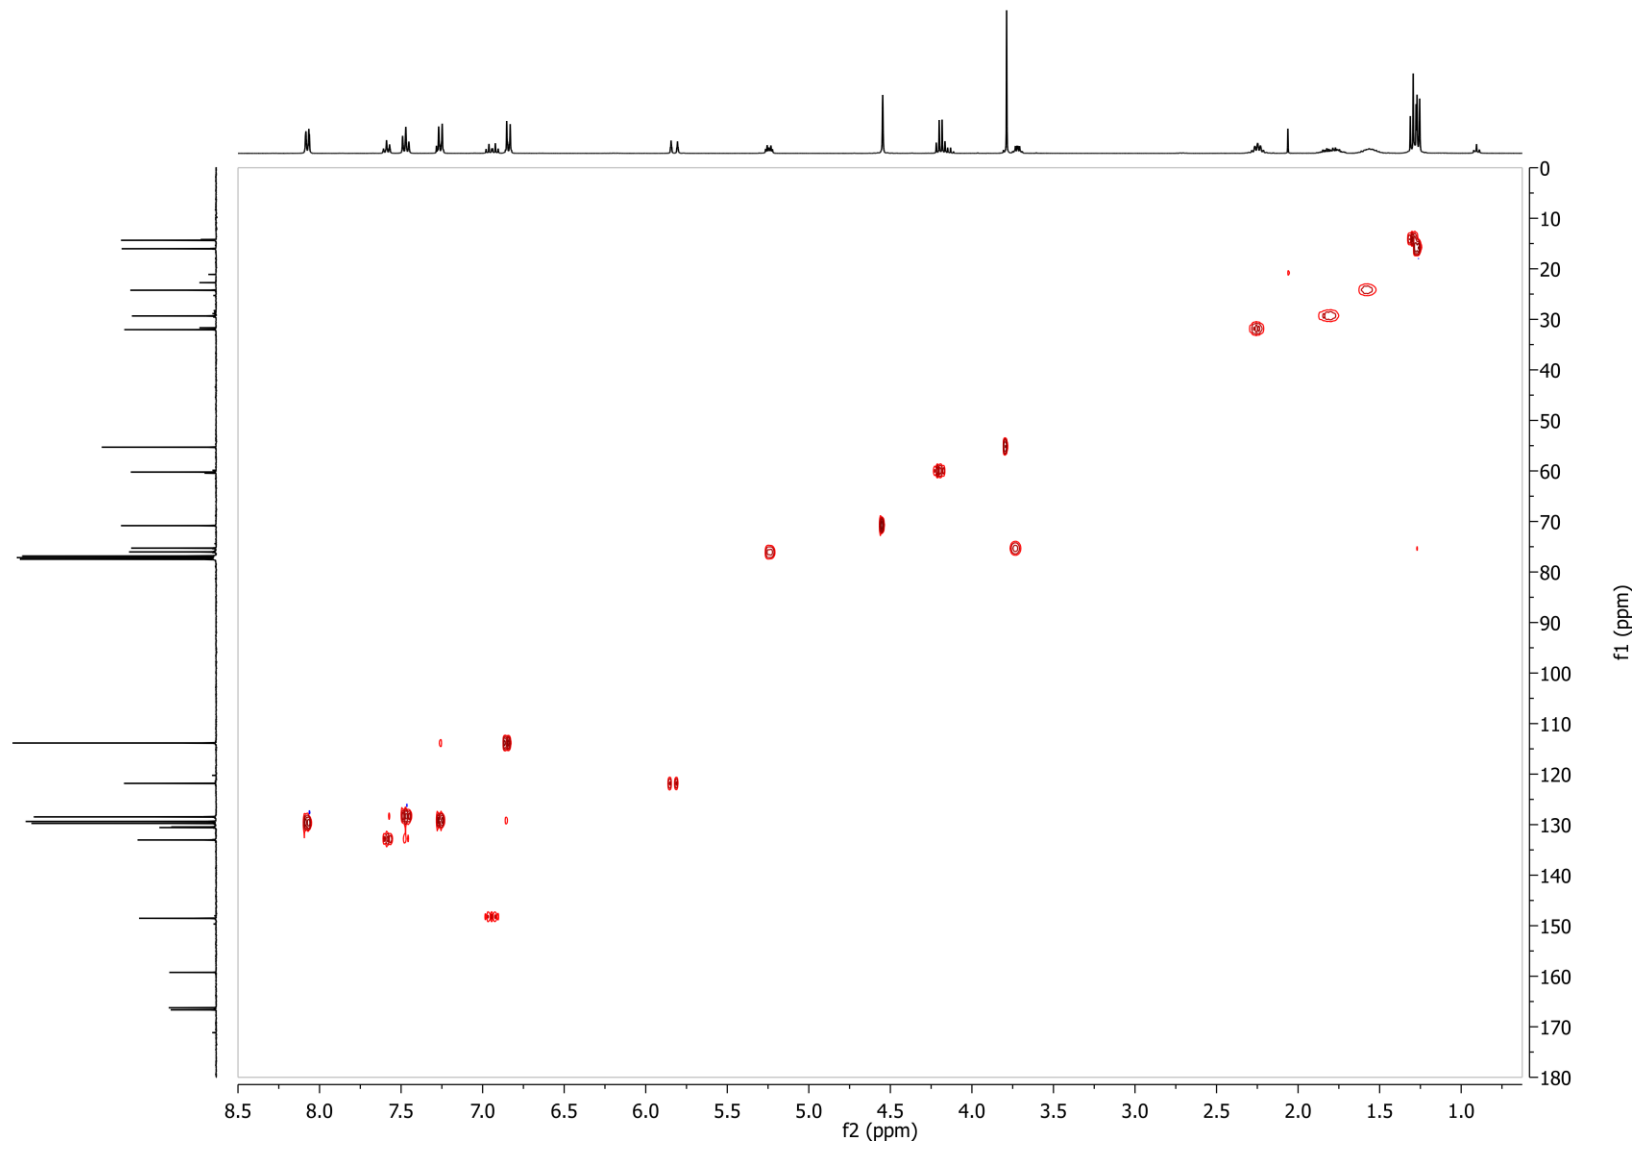

**Figure S31:**  $^1\text{H}$  NMR spectrum of synthetic (*7R,8R,2E*)-*threo*-Ethyl 7-benzoyloxy-8-hydroxy-2-nonenoate (**20a**) in  $\text{CDCl}_3$ .

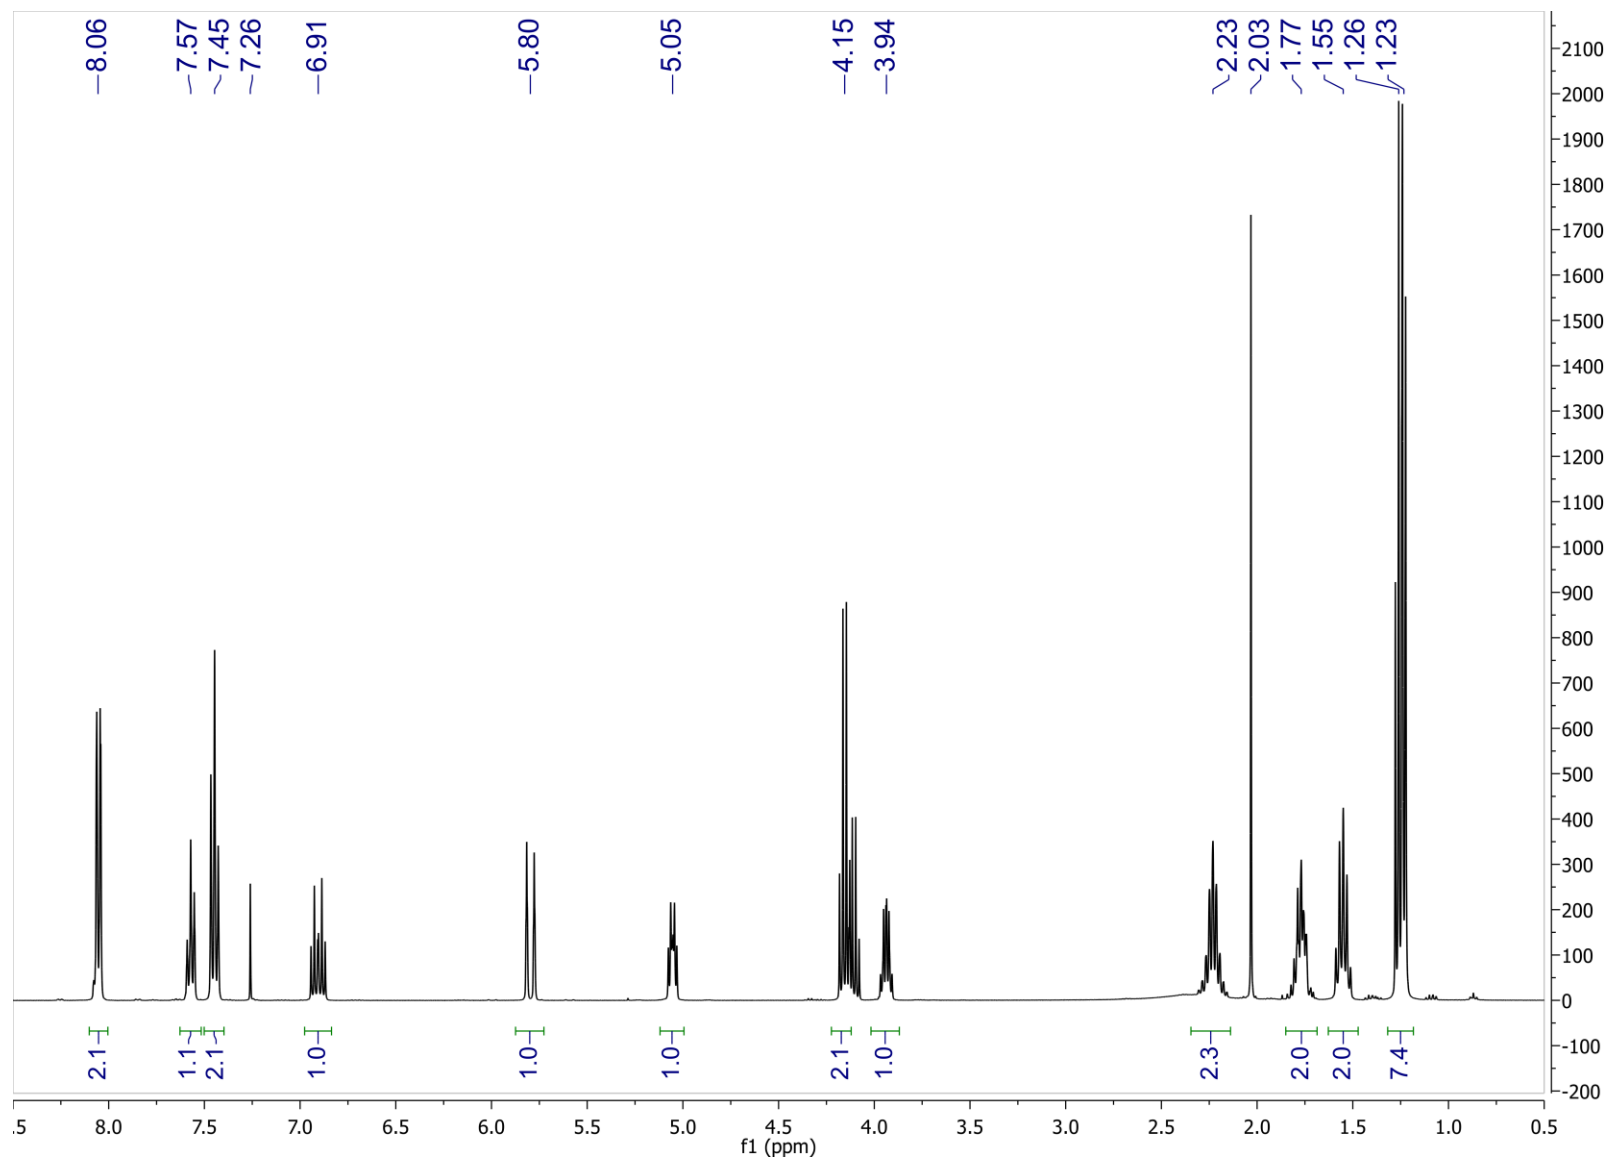

**Figure S32:**  $^{13}\text{C}$  NMR spectrum of synthetic (7*R*,8*R*,2*E*)-*threo*-Ethyl 7-benzoyloxy-8-hydroxy-2-nonenoate (**20a**) in  $\text{CDCl}_3$ .

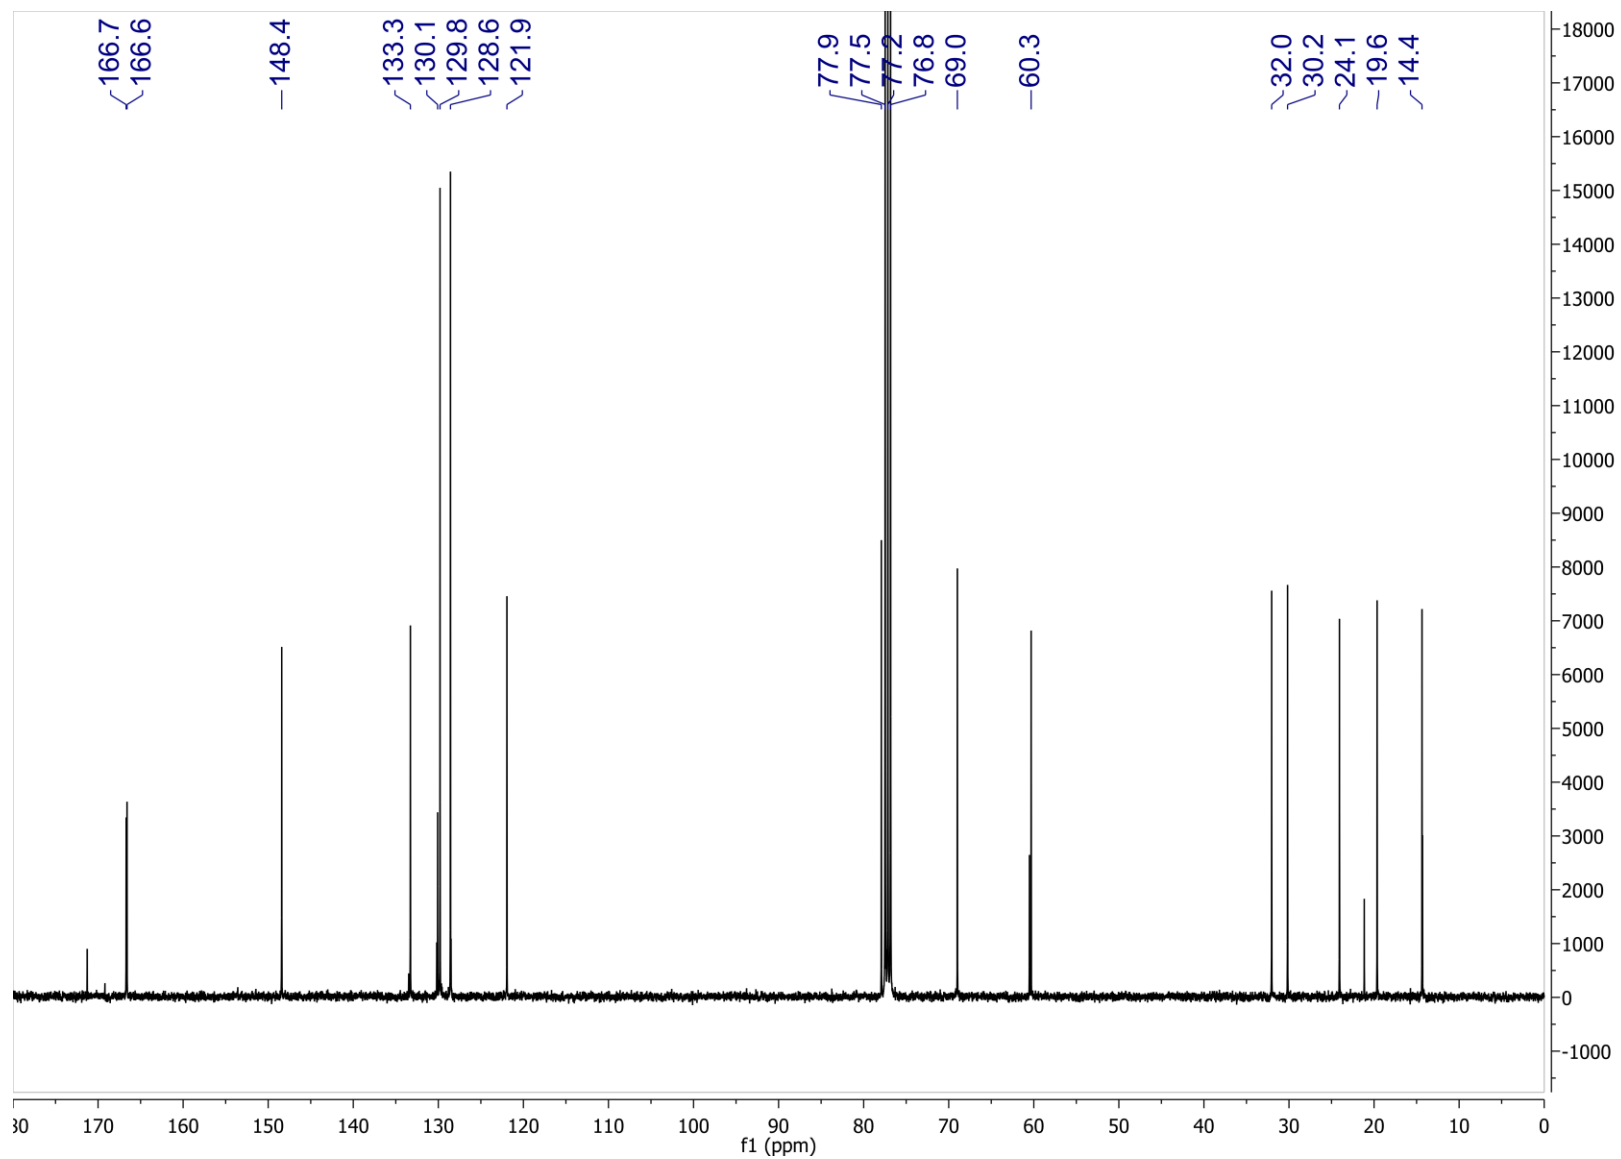

**Figure S33:** HSQC spectrum of synthetic (7*R*,8*R*,2*E*)-*threo*-Ethyl 7-benzoyloxy-8-hydroxy-2-nonenoate (**20a**) in CDCl<sub>3</sub>.

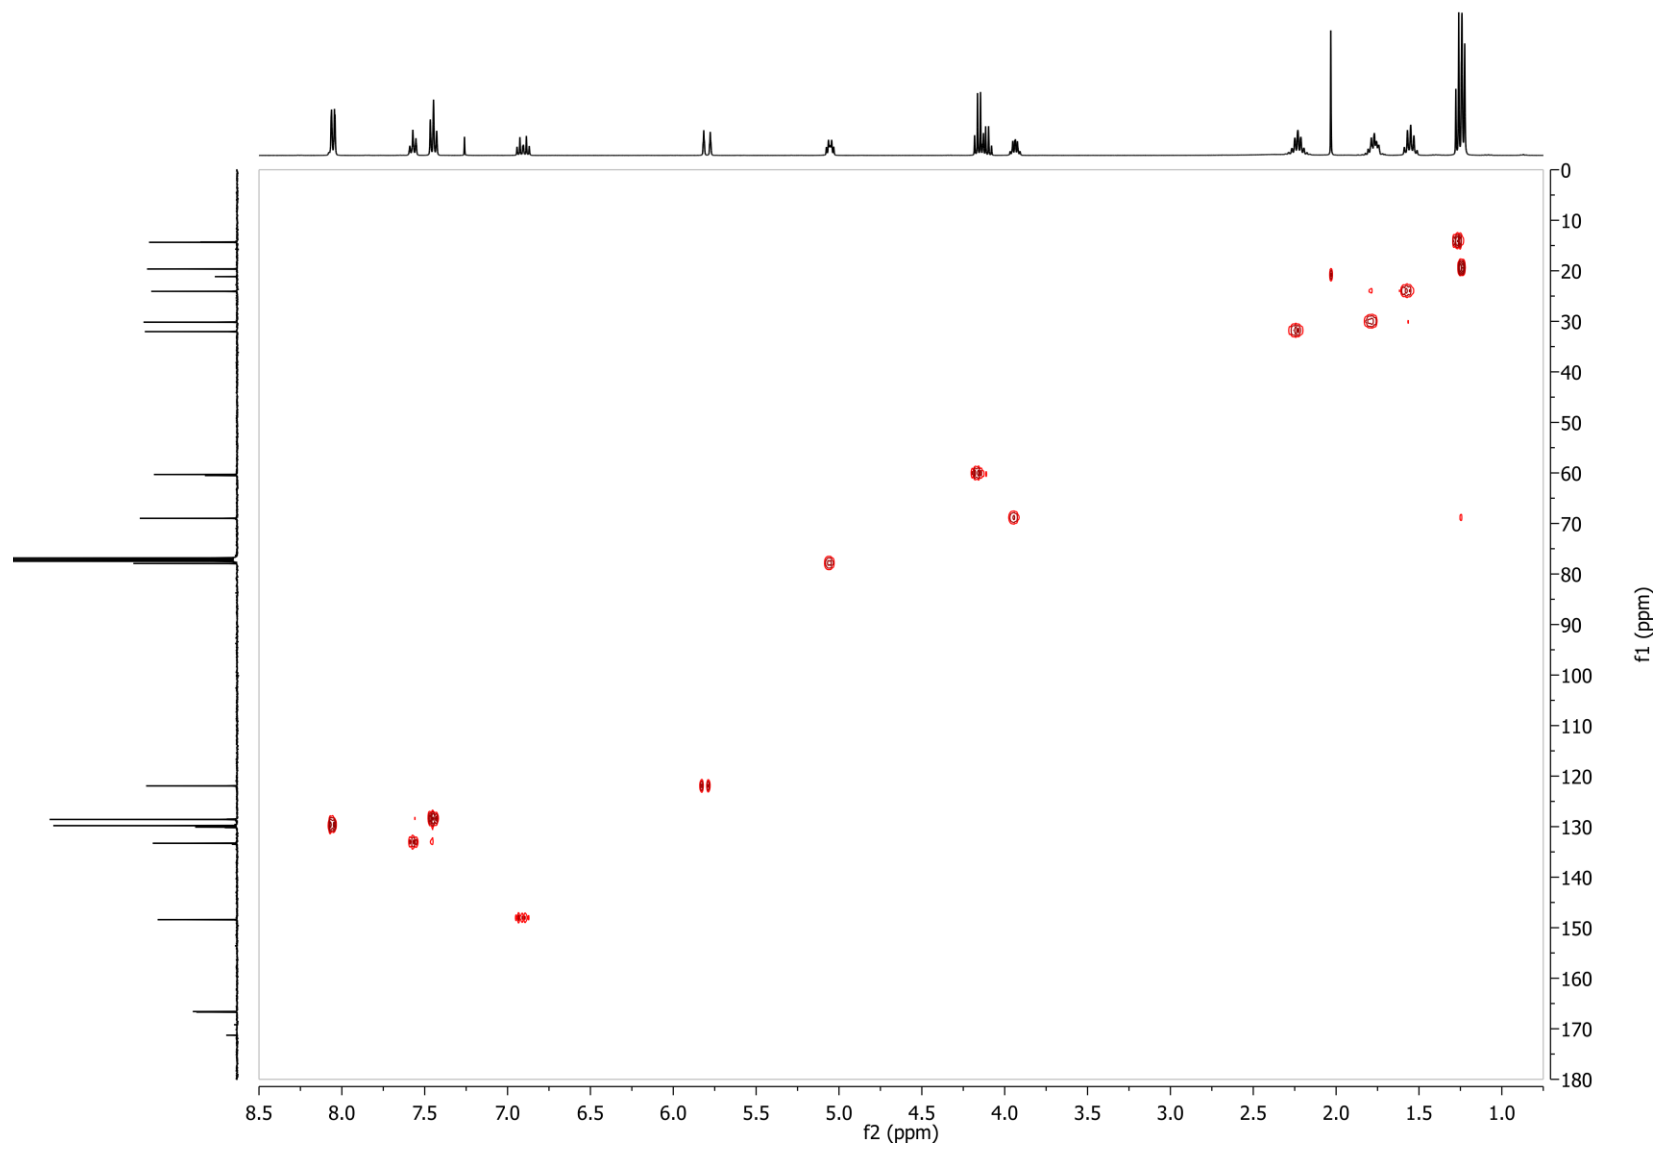

**Figure S34:** dqf-COSY spectrum of synthetic (*7R,8R,2E*)-*threo*-Ethyl 7-benzoyloxy-8-hydroxy-2-nonenoate (**20a**) in CDCl<sub>3</sub>.

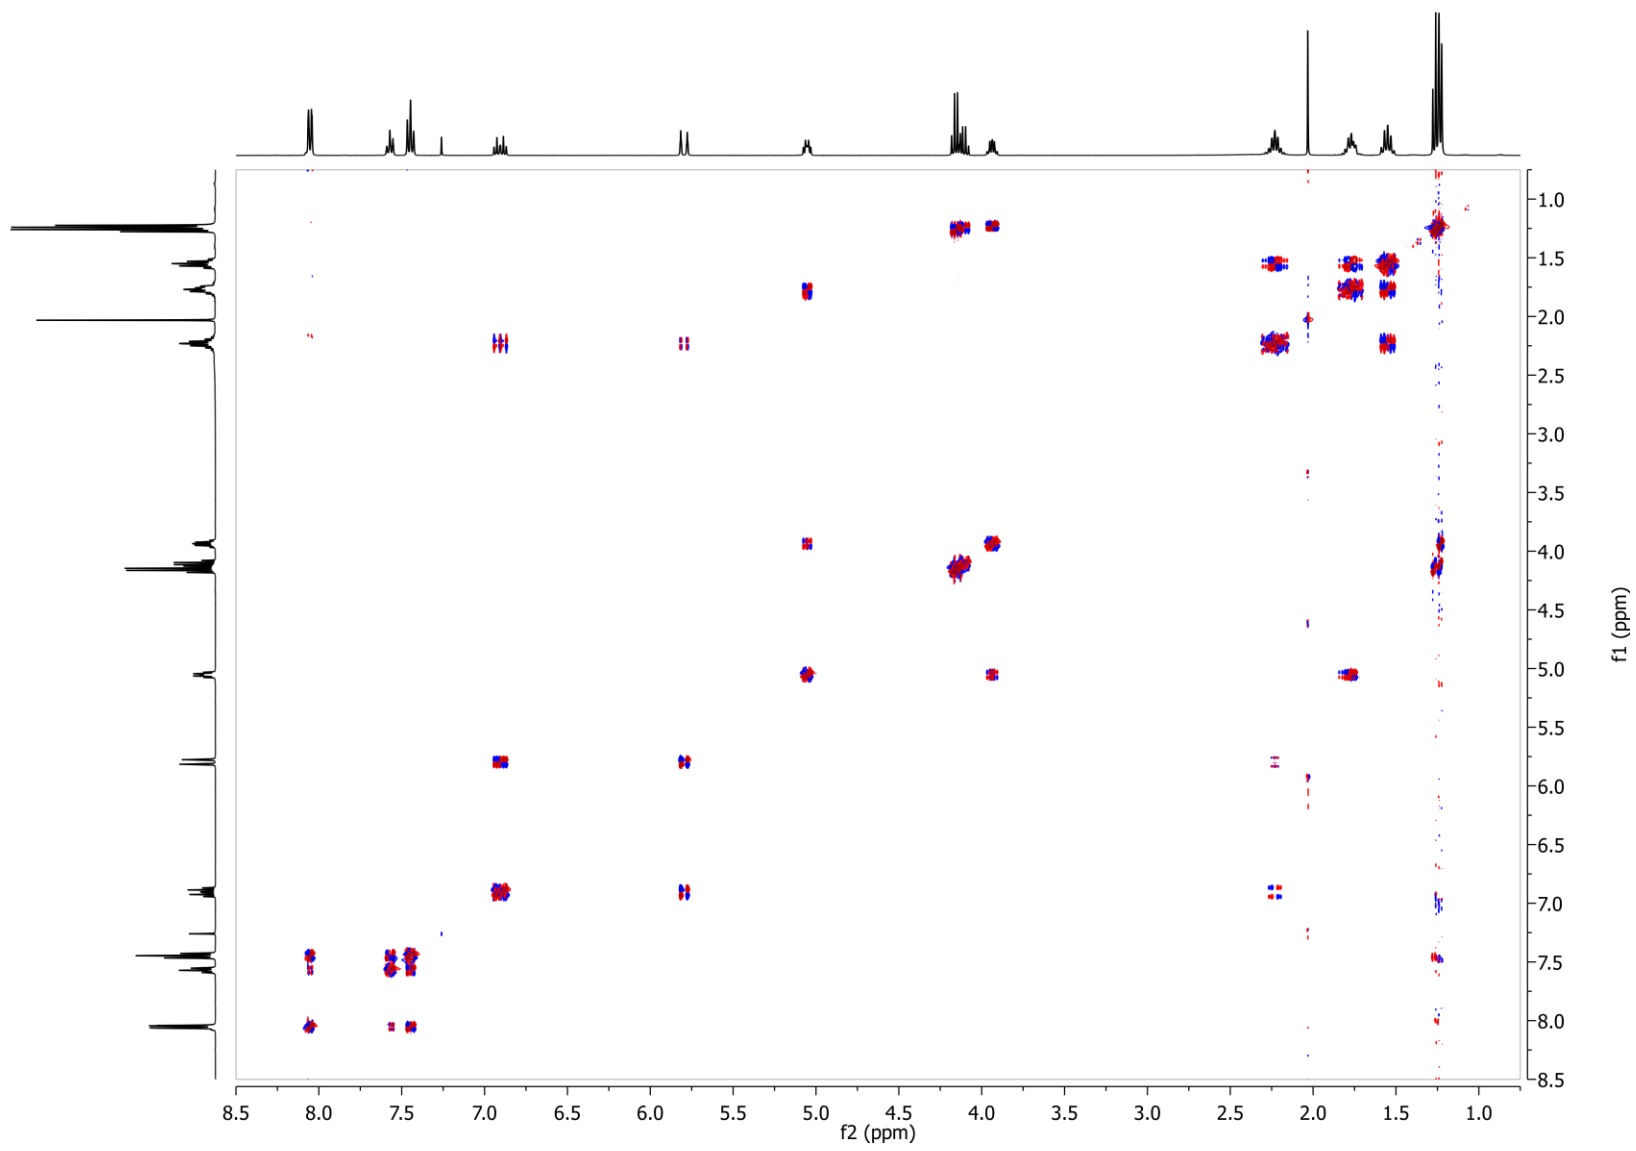

**Figure S35:**  $^1\text{H}$  NMR spectrum of synthetic (7*S*,8*R*,2*E*)-*erythro*-Ethyl 7-benzoyloxy-8-hydroxy-2-nonenoate (**20b**) in  $\text{CDCl}_3$ .

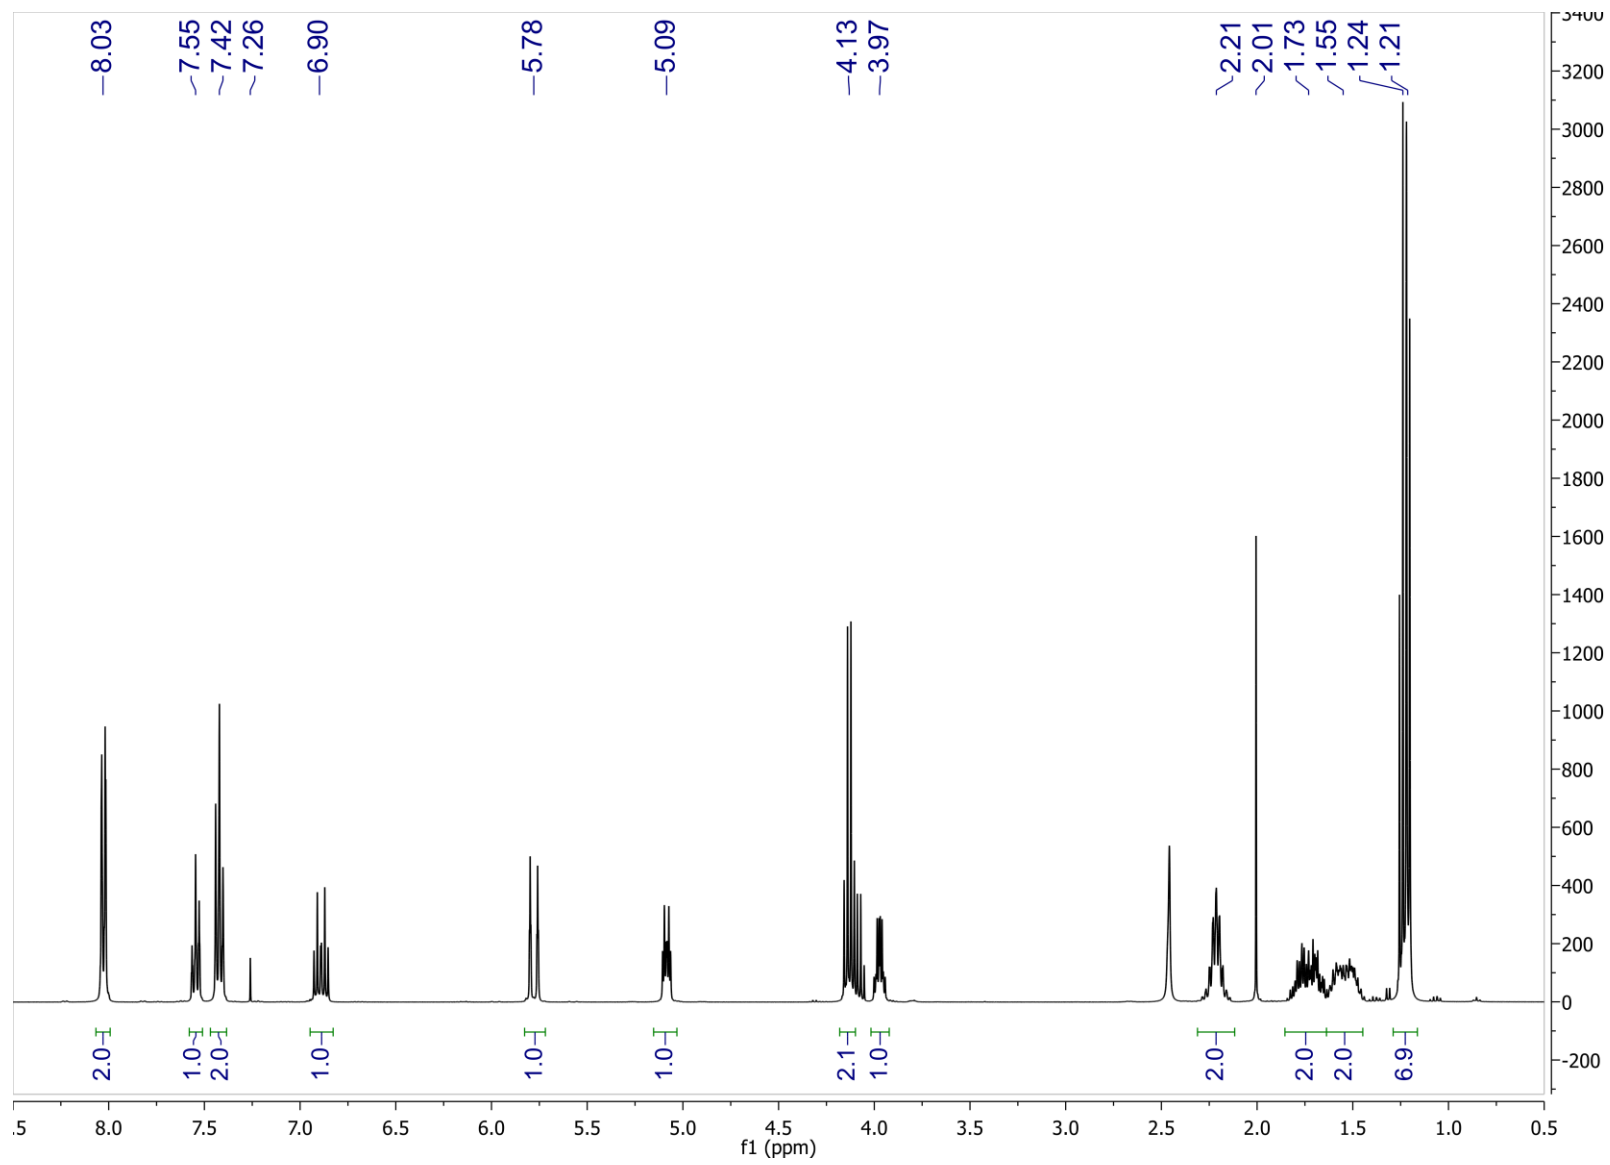



**Figure S36:**  $^{13}\text{C}$  NMR spectrum of synthetic (7*S*,8*R*,2*E*)-*erythro*-Ethyl 7-benzoyloxy-8-hydroxy-2-nonenoate (**20b**) in  $\text{CDCl}_3$ .

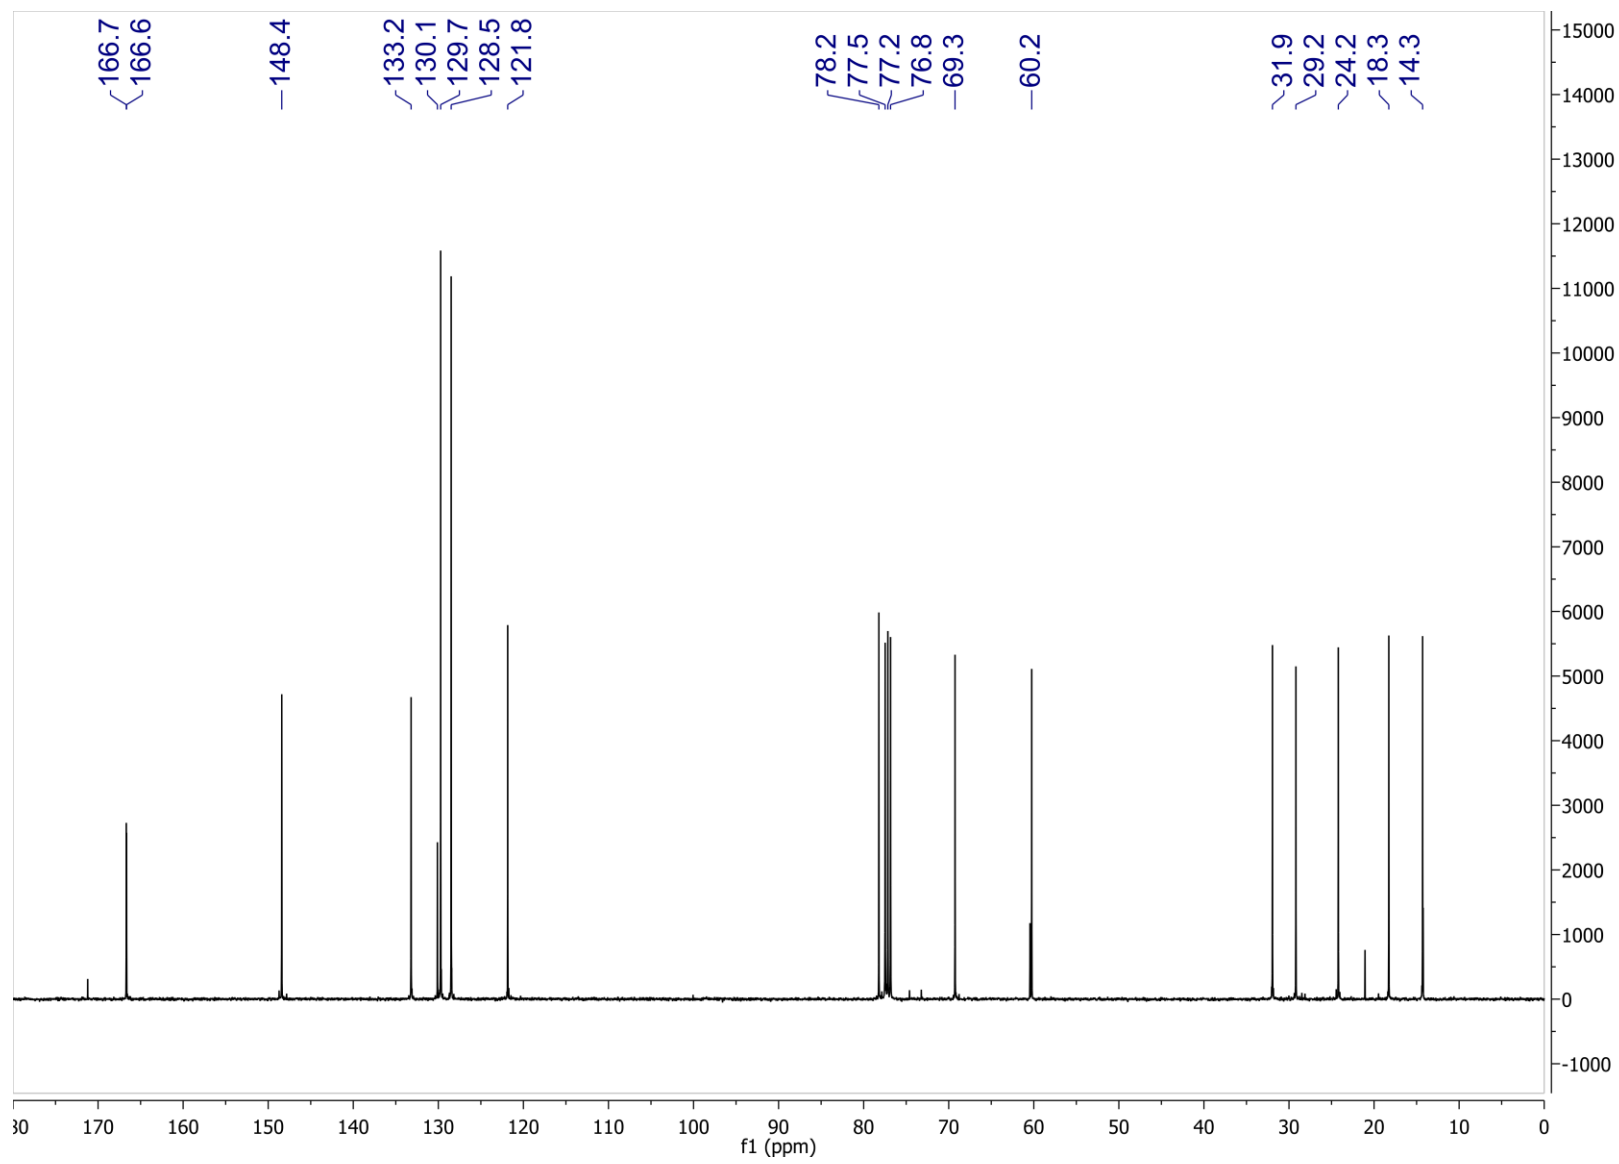

**Figure S37:** HSQC spectrum of synthetic (7*S*,8*R*,2*E*)-*erythro*-Ethyl 7-benzoyloxy-8-hydroxy-2-nonenoate (**20b**) in CDCl<sub>3</sub>.

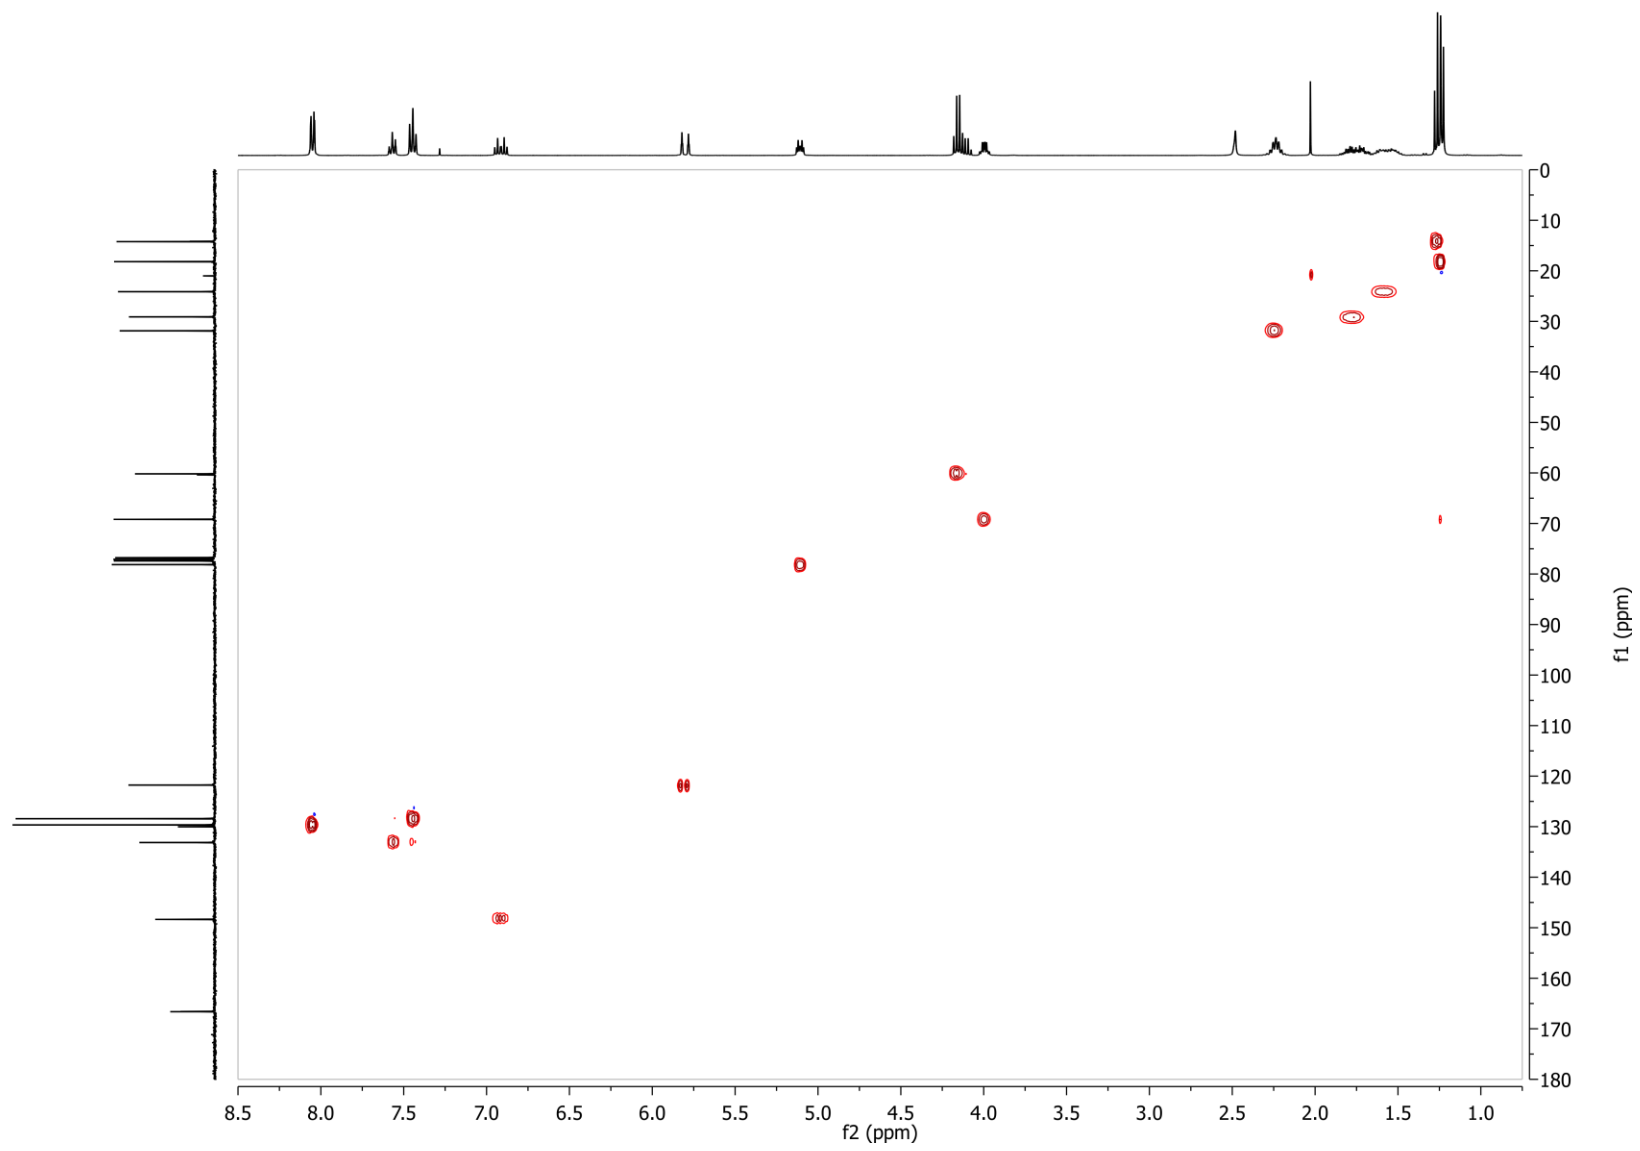

**Figure S38:** dqf-COSY spectrum of synthetic *(7S,8R,2E)*-erythro-Ethyl 7-benzoyloxy-8-hydroxy-2-nonenoate (**20b**) in CDCl<sub>3</sub>.

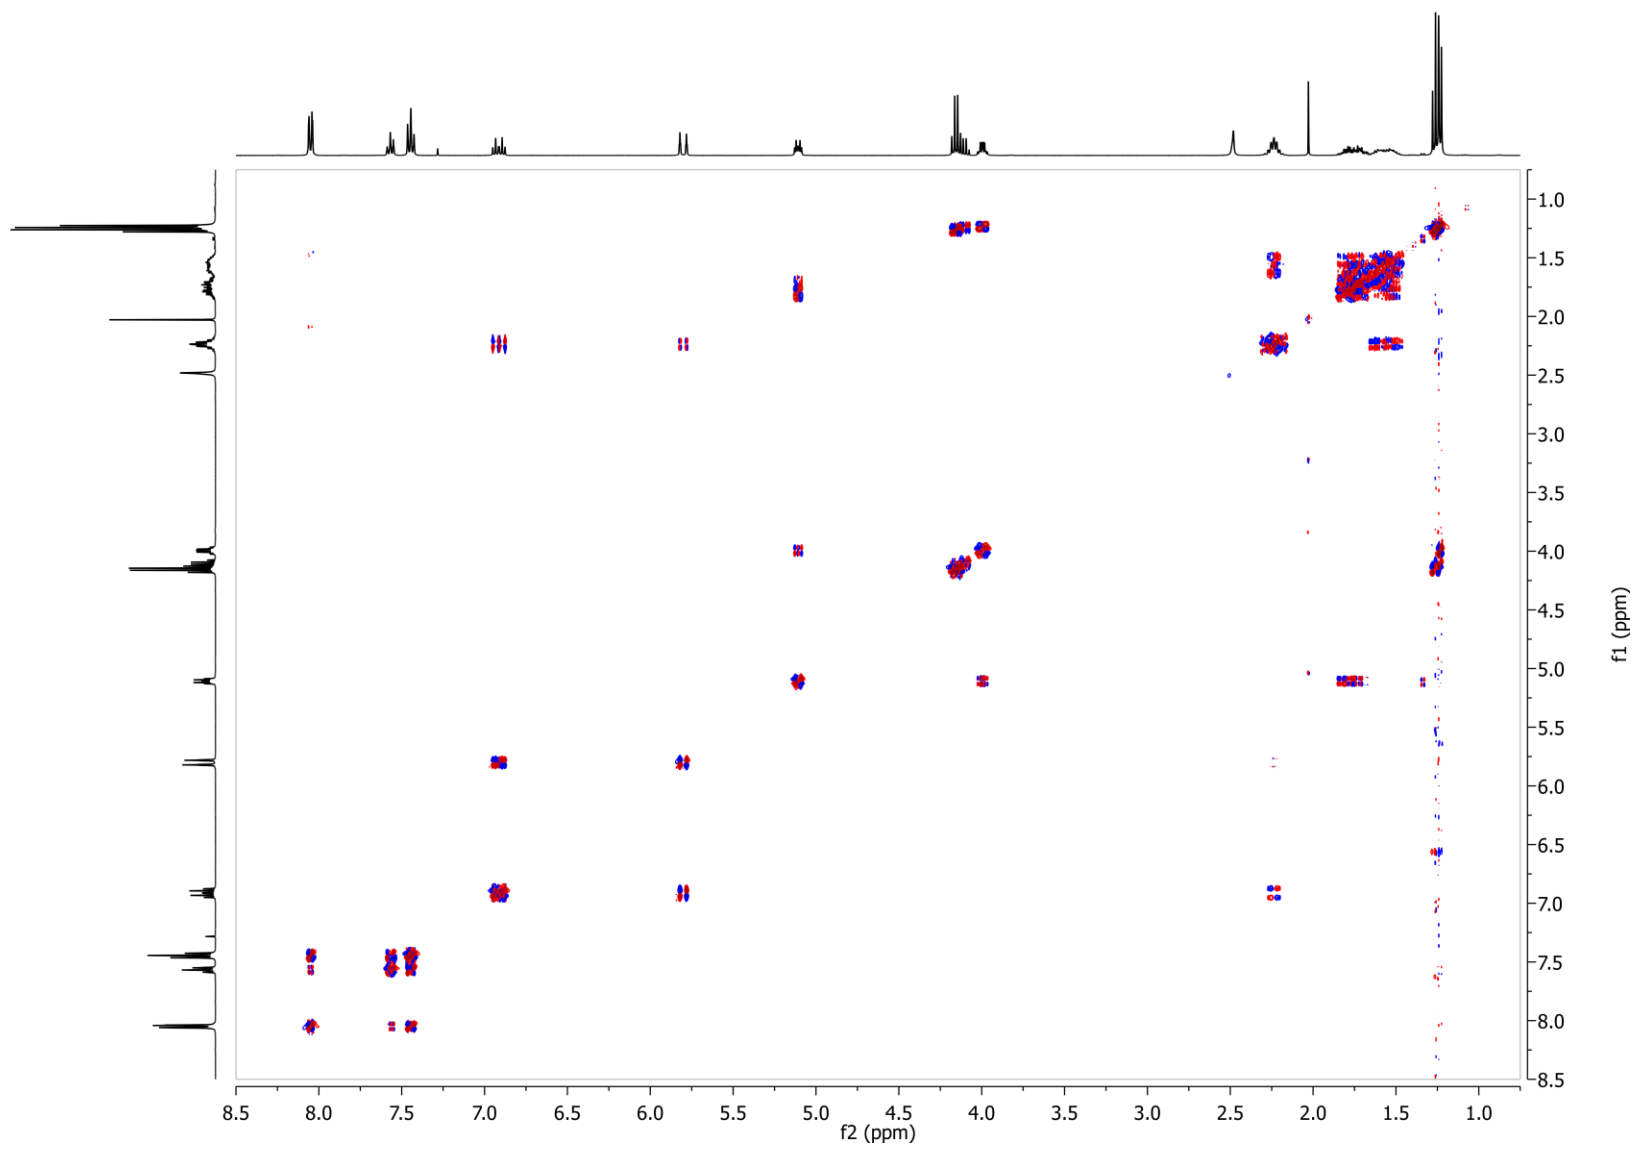

**Figure S39:**  $^1\text{H}$  NMR spectrum of synthetic (7*R*,8*R*,2*E*)-*threo*-Ethyl 7-benzoyloxy-8-[(2,4-di-*O*-benzoyl-3,6-dideoxy- $\alpha$ -L-arabino-hexopyranosyl)oxy]-2-nonenoate (**22a**) in  $\text{CDCl}_3$ .

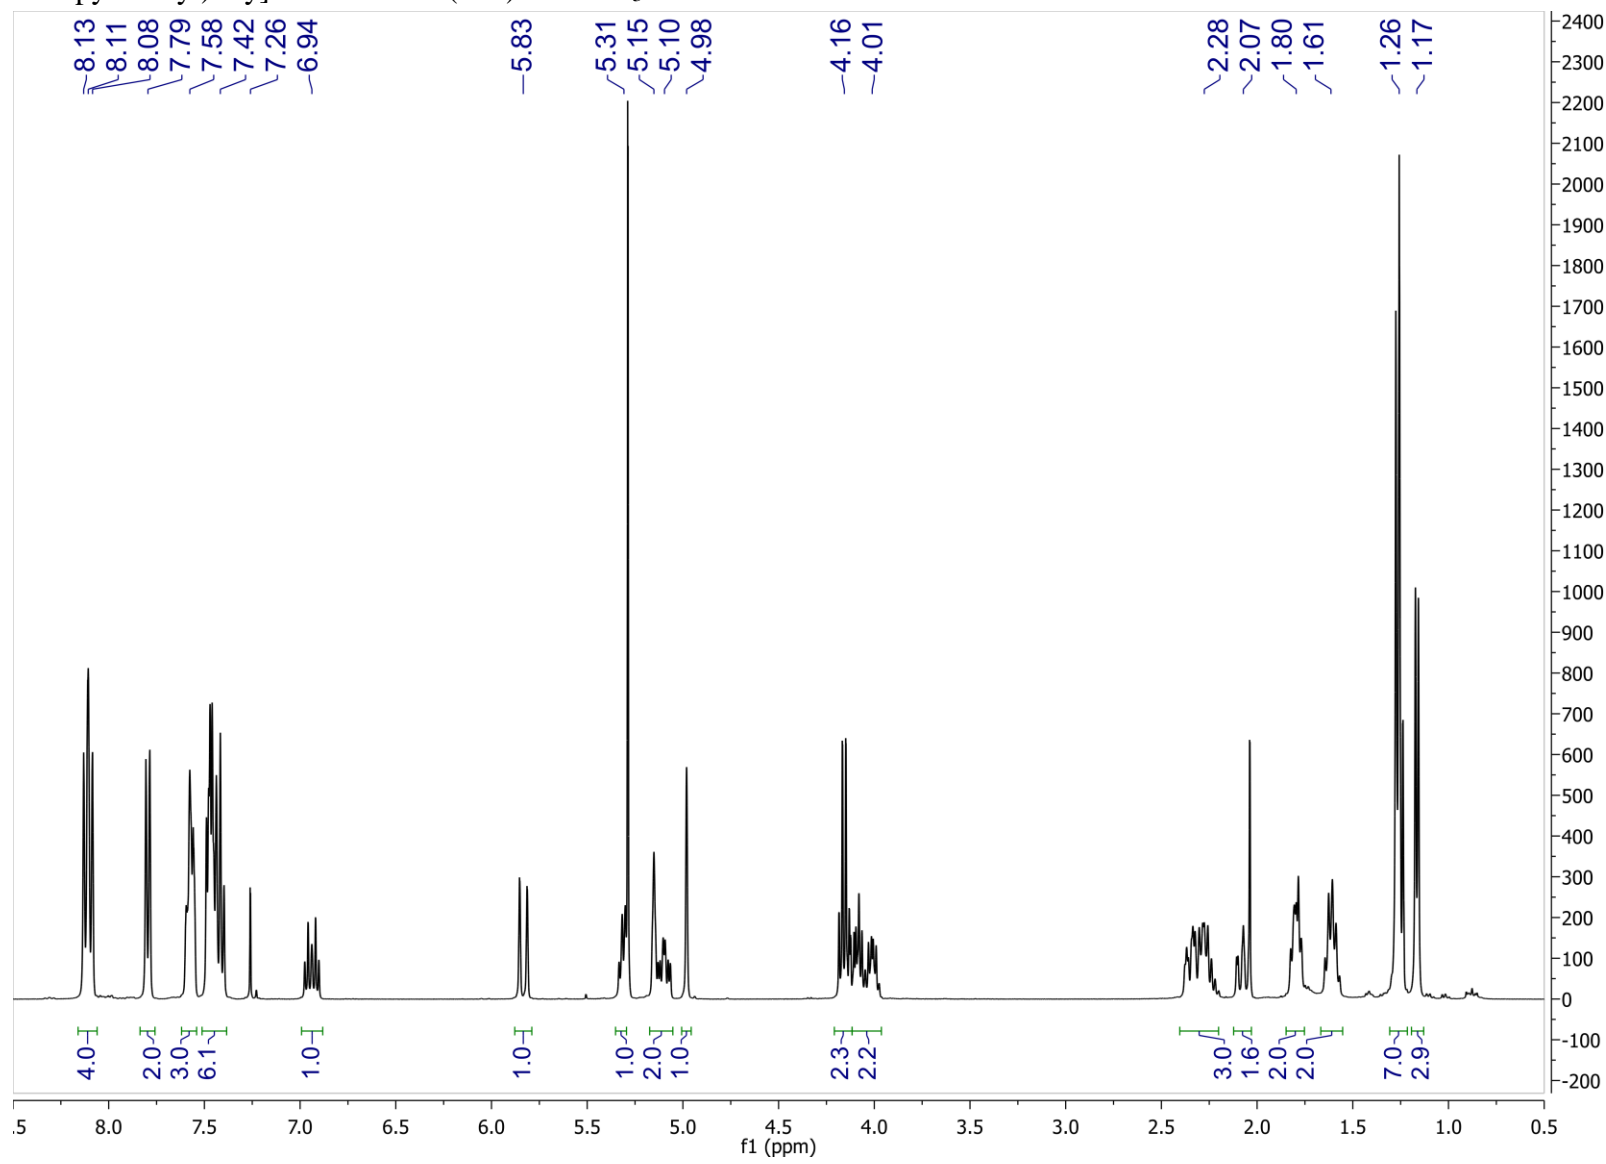

**Figure S40:**  $^{13}\text{C}$  NMR spectrum of synthetic (7*R*,8*R*,2*E*)-*threo*-Ethyl 7-benzoyloxy-8-[(2,4-di-*O*-benzoyl-3,6-dideoxy- $\alpha$ -L-arabino-hexopyranosyl)oxy]-2-nonenoate (**22a**) in  $\text{CDCl}_3$ .

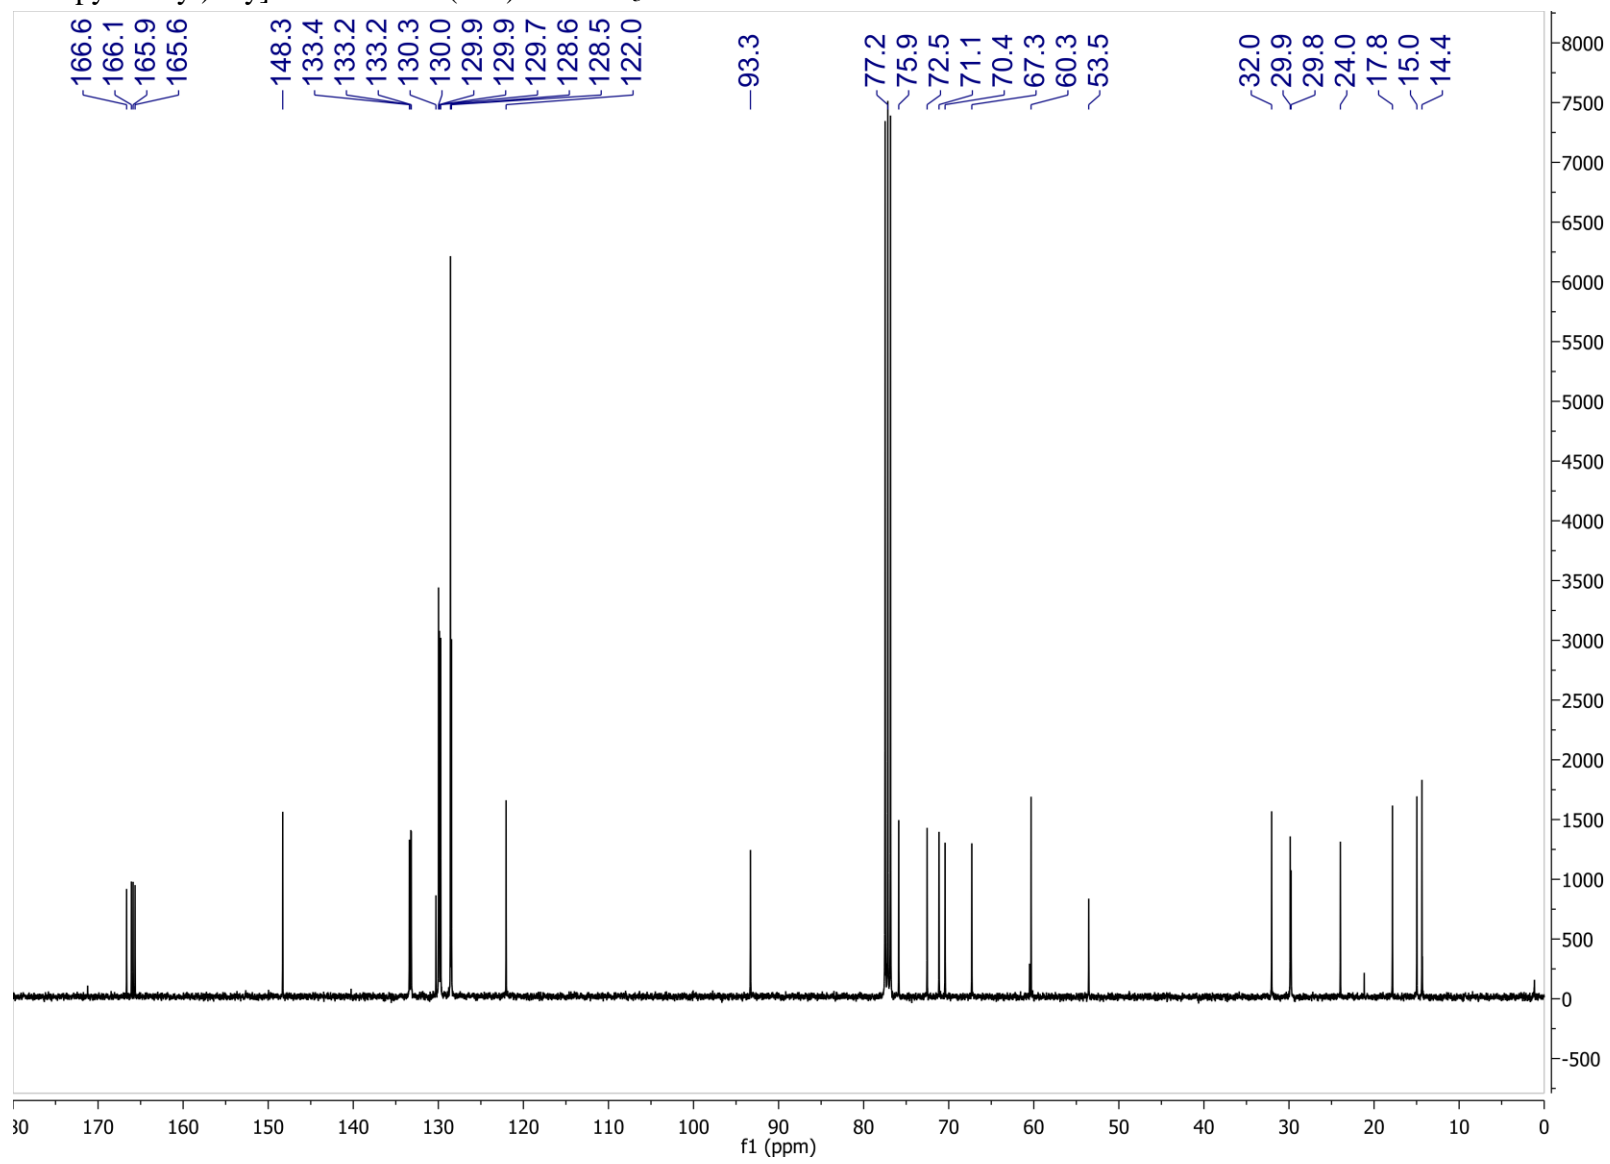

**Figure S41:** HSQC spectrum of synthetic (7*R*,8*R*,2*E*)-*threo*-Ethyl 7-benzoyloxy-8-[(2,4-di-*O*-benzoyl-3,6-dideoxy- $\alpha$ -L-arabino-hexopyranosyl)oxy]-2-nonenoate (**22a**) in CDCl<sub>3</sub>.

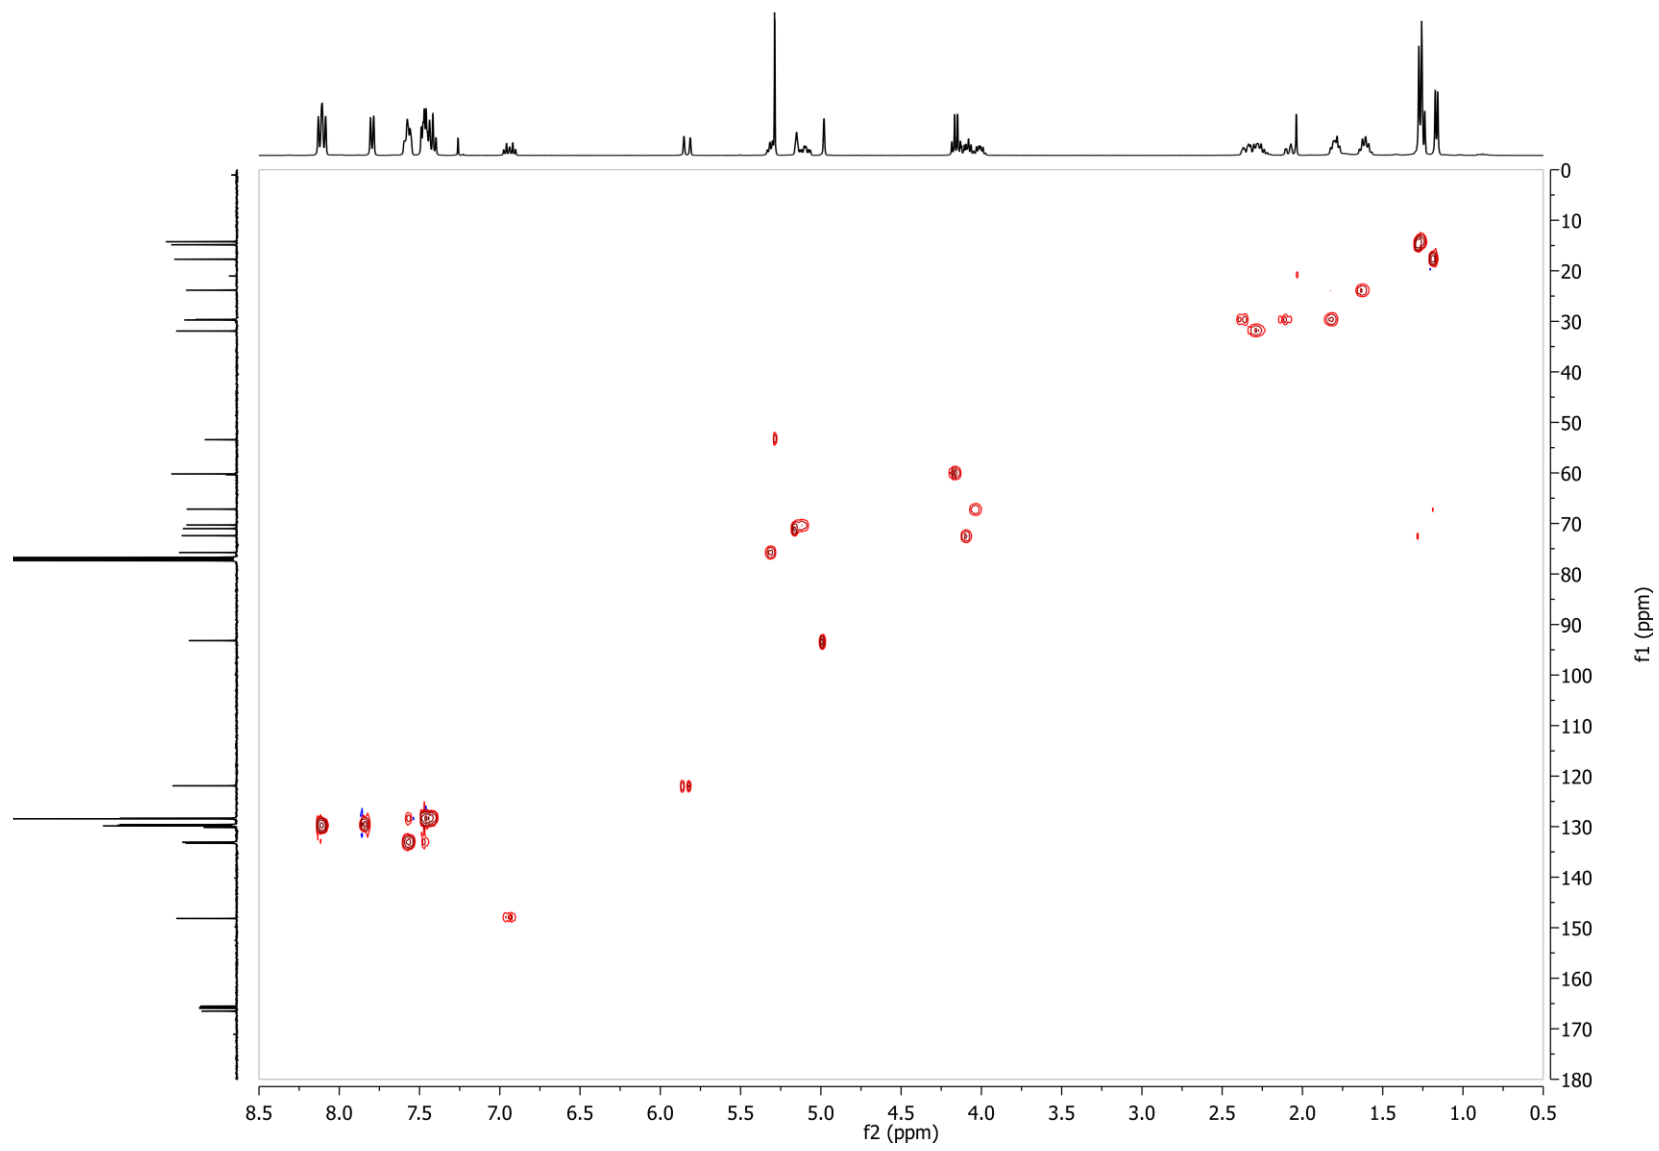

**Figure S42:** dqf-COSY spectrum of synthetic (7*R*,8*R*,2*E*)-*threo*-Ethyl 7-benzoyloxy-8-[(2,4-di-*O*-benzoyl-3,6-dideoxy- $\alpha$ -L-arabino-hexopyranosyl)oxy]-2-nonenoate (**22a**) in CDCl<sub>3</sub>.

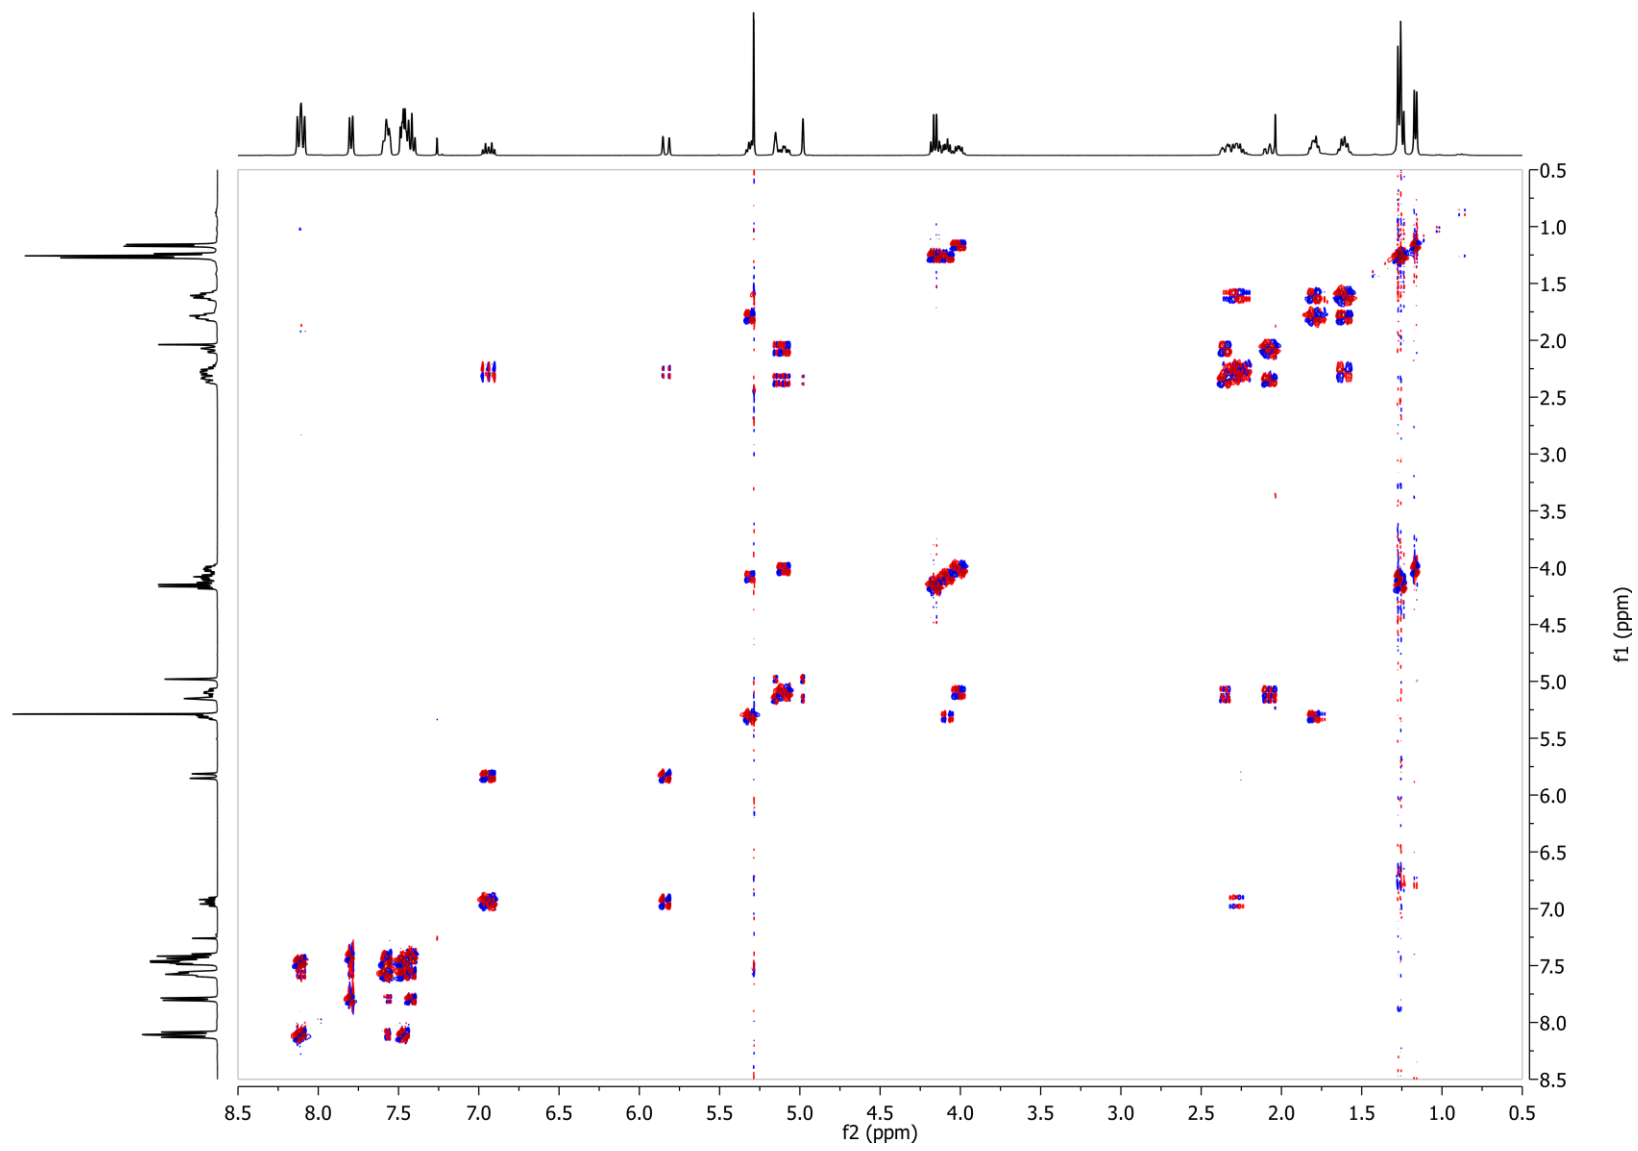

**Figure S43:**  $^1\text{H}$  NMR spectrum of synthetic (*7S,8R,2E*)-erythro-Ethyl 7-benzoyloxy-8-[(2,4-di-*O*-benzoyl-3,6-dideoxy- $\alpha$ -L-arabino-hexopyranosyl)oxy]-2-nonenoate (**22b**) in  $\text{CDCl}_3$ .

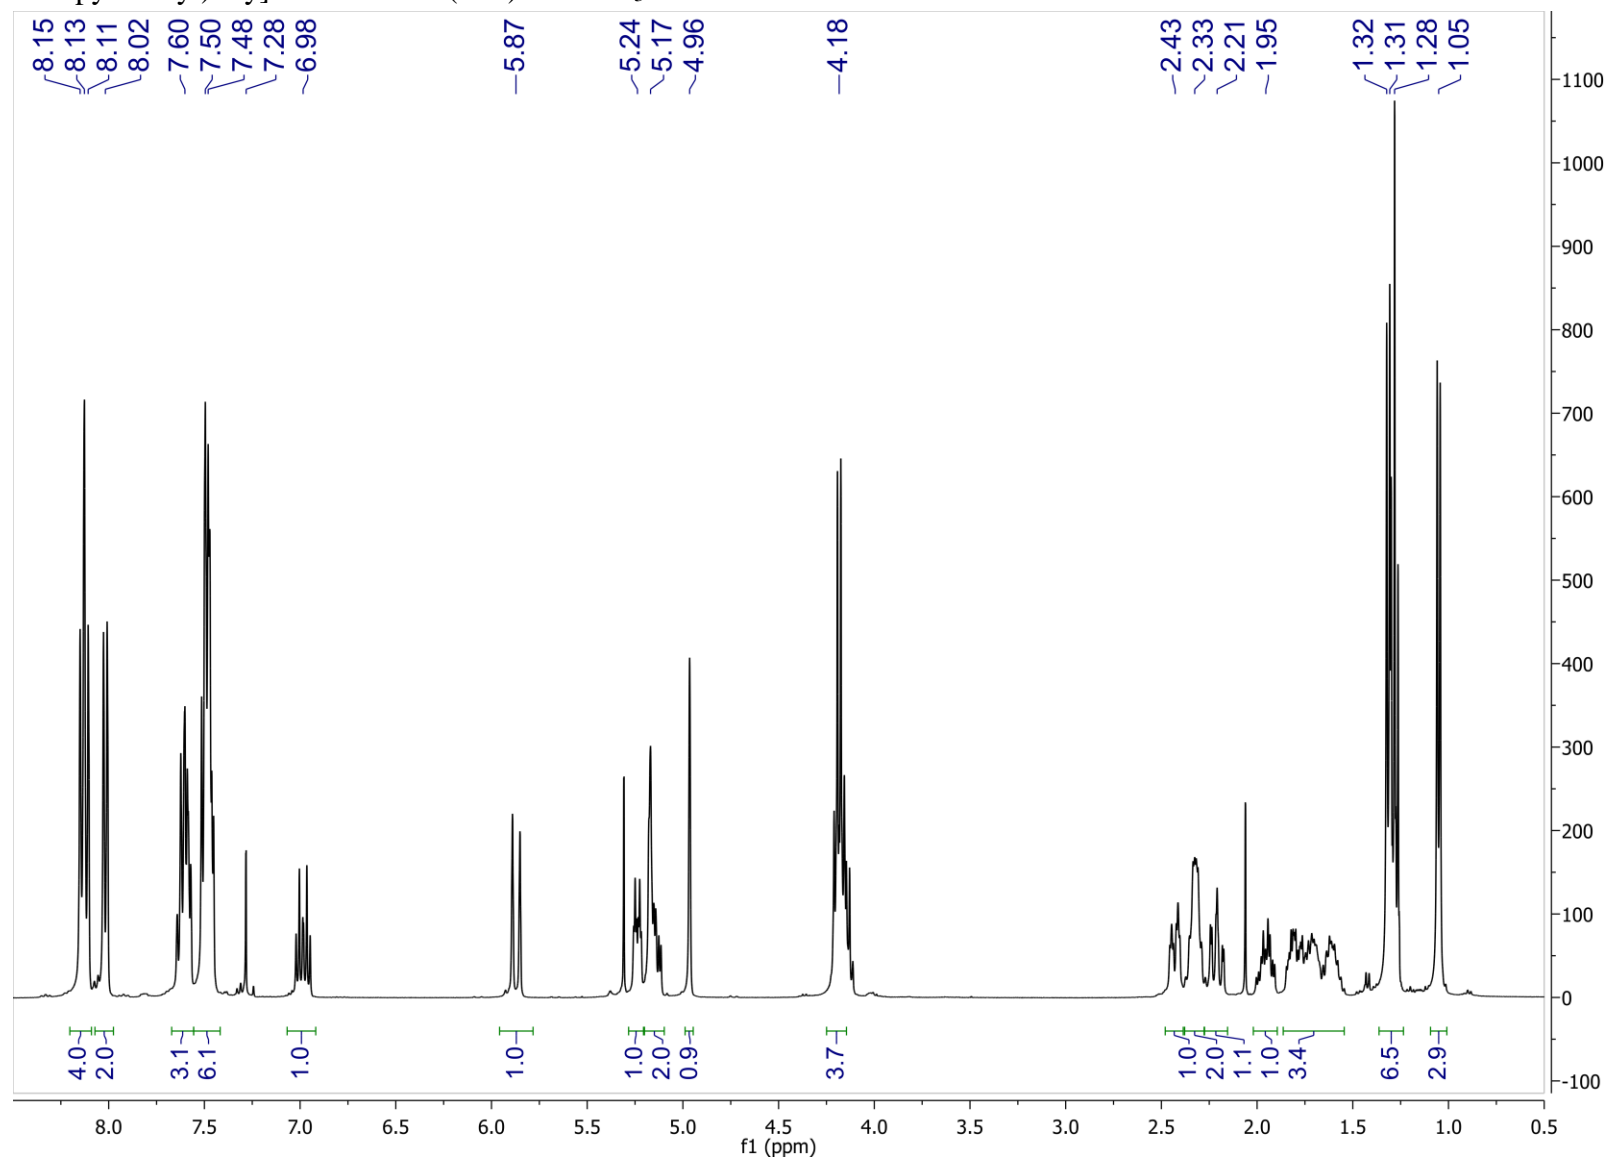



**Figure S44:**  $^{13}\text{C}$  NMR spectrum of synthetic (*7S,8R,2E*)-erythro-Ethyl 7-benzoyloxy-8-[(2,4-di-*O*-benzoyl-3,6-dideoxy- $\alpha$ -L-arabino-hexopyranosyl)oxy]-2-nonenoate (**22b**) in  $\text{CDCl}_3$ .

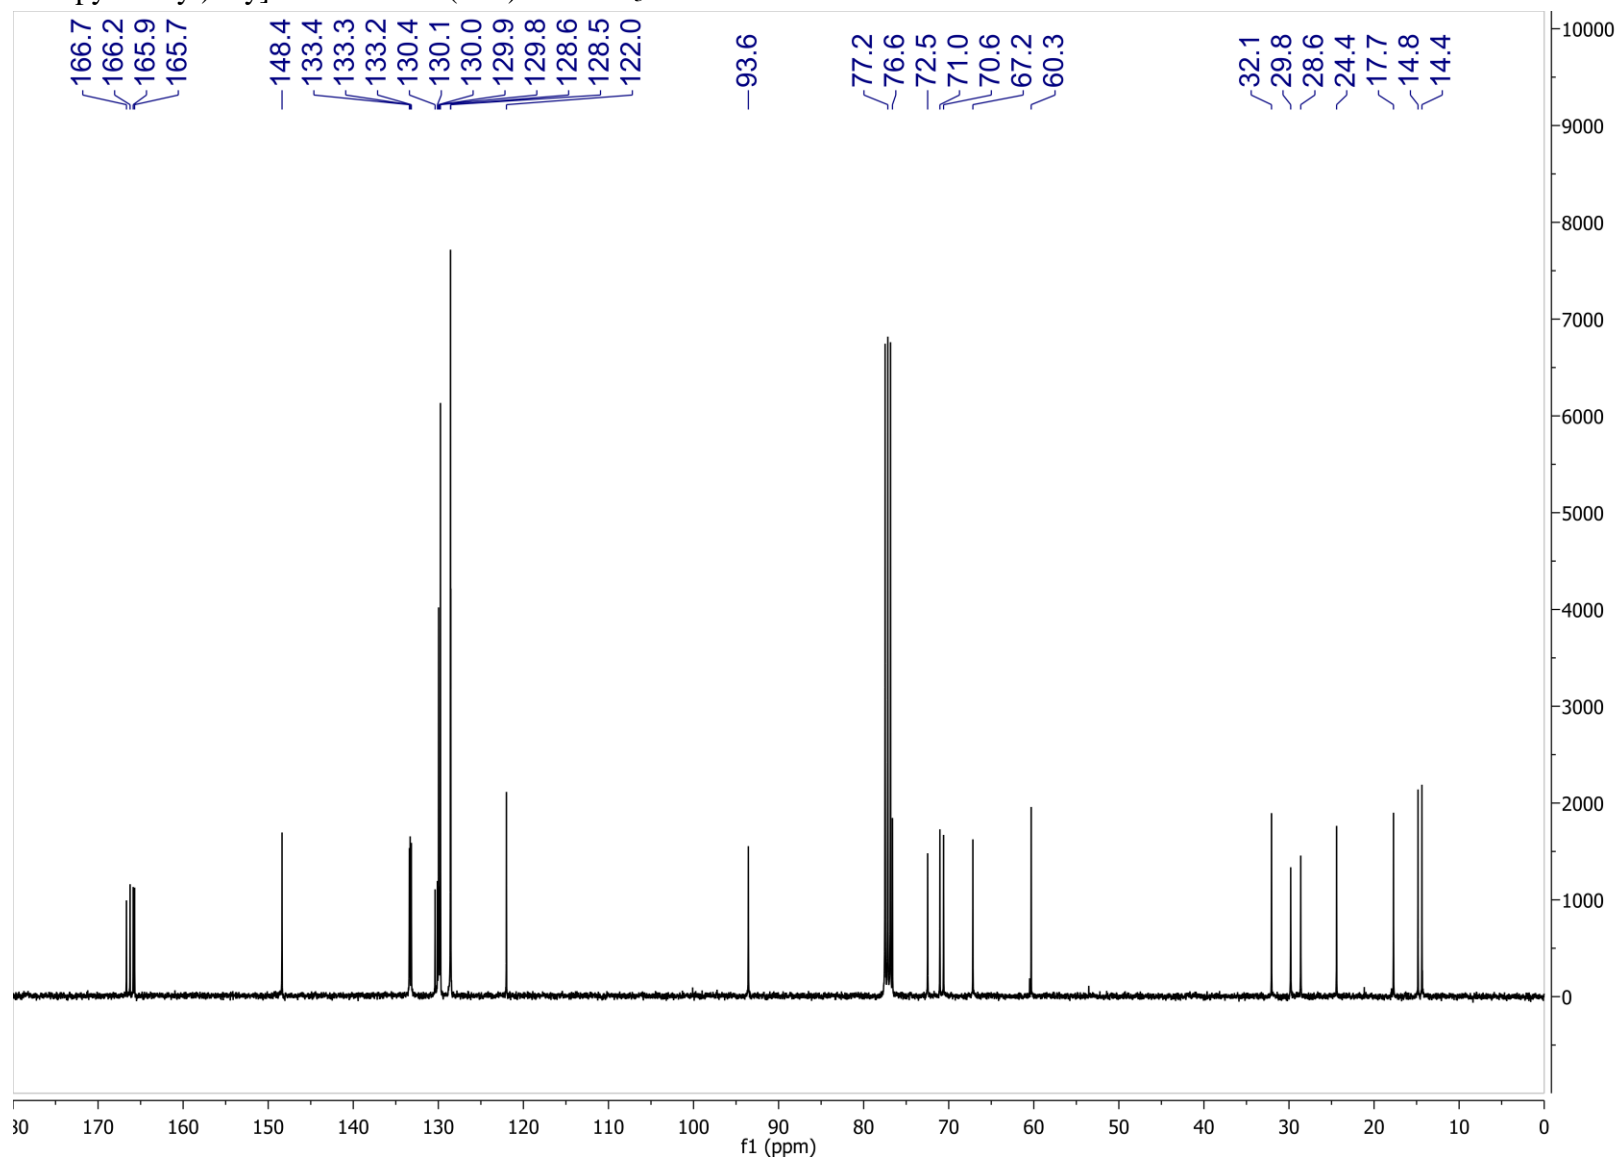

**Figure S45:** HSQC spectrum of synthetic (7*S*,8*R*,2*E*)-*erythro*-Ethyl 7-benzoyloxy-8-[(2,4-di-*O*-benzoyl-3,6-dideoxy- $\alpha$ -L-arabino-hexopyranosyl)oxy]-2-nonenoate (**22b**) in CDCl<sub>3</sub>.

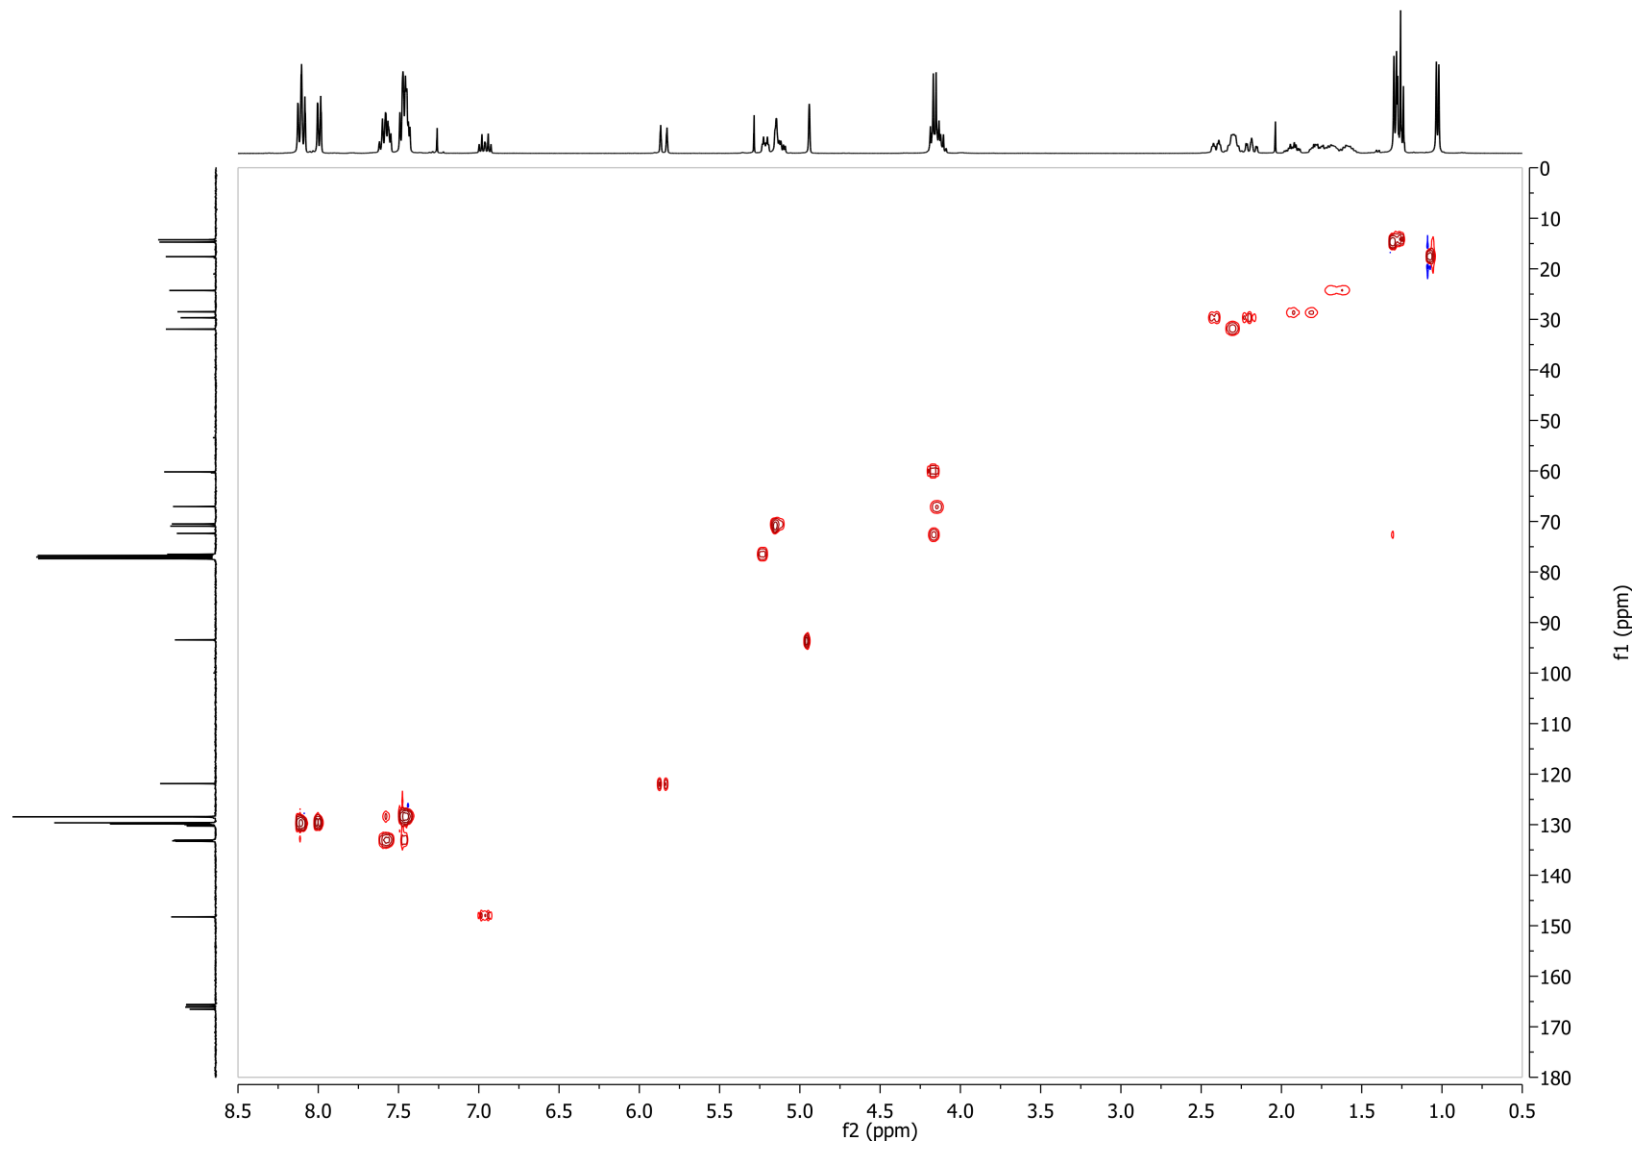

**Figure S46:** dqf-COSY spectrum of synthetic (7*S*,8*R*,2*E*)-*erythro*-Ethyl 7-benzoyloxy-8-[(2,4-di-*O*-benzoyl-3,6-dideoxy- $\alpha$ -L-arabino-hexopyranosyl)oxy]-2-nonenoate (**22b**) in CDCl<sub>3</sub>.

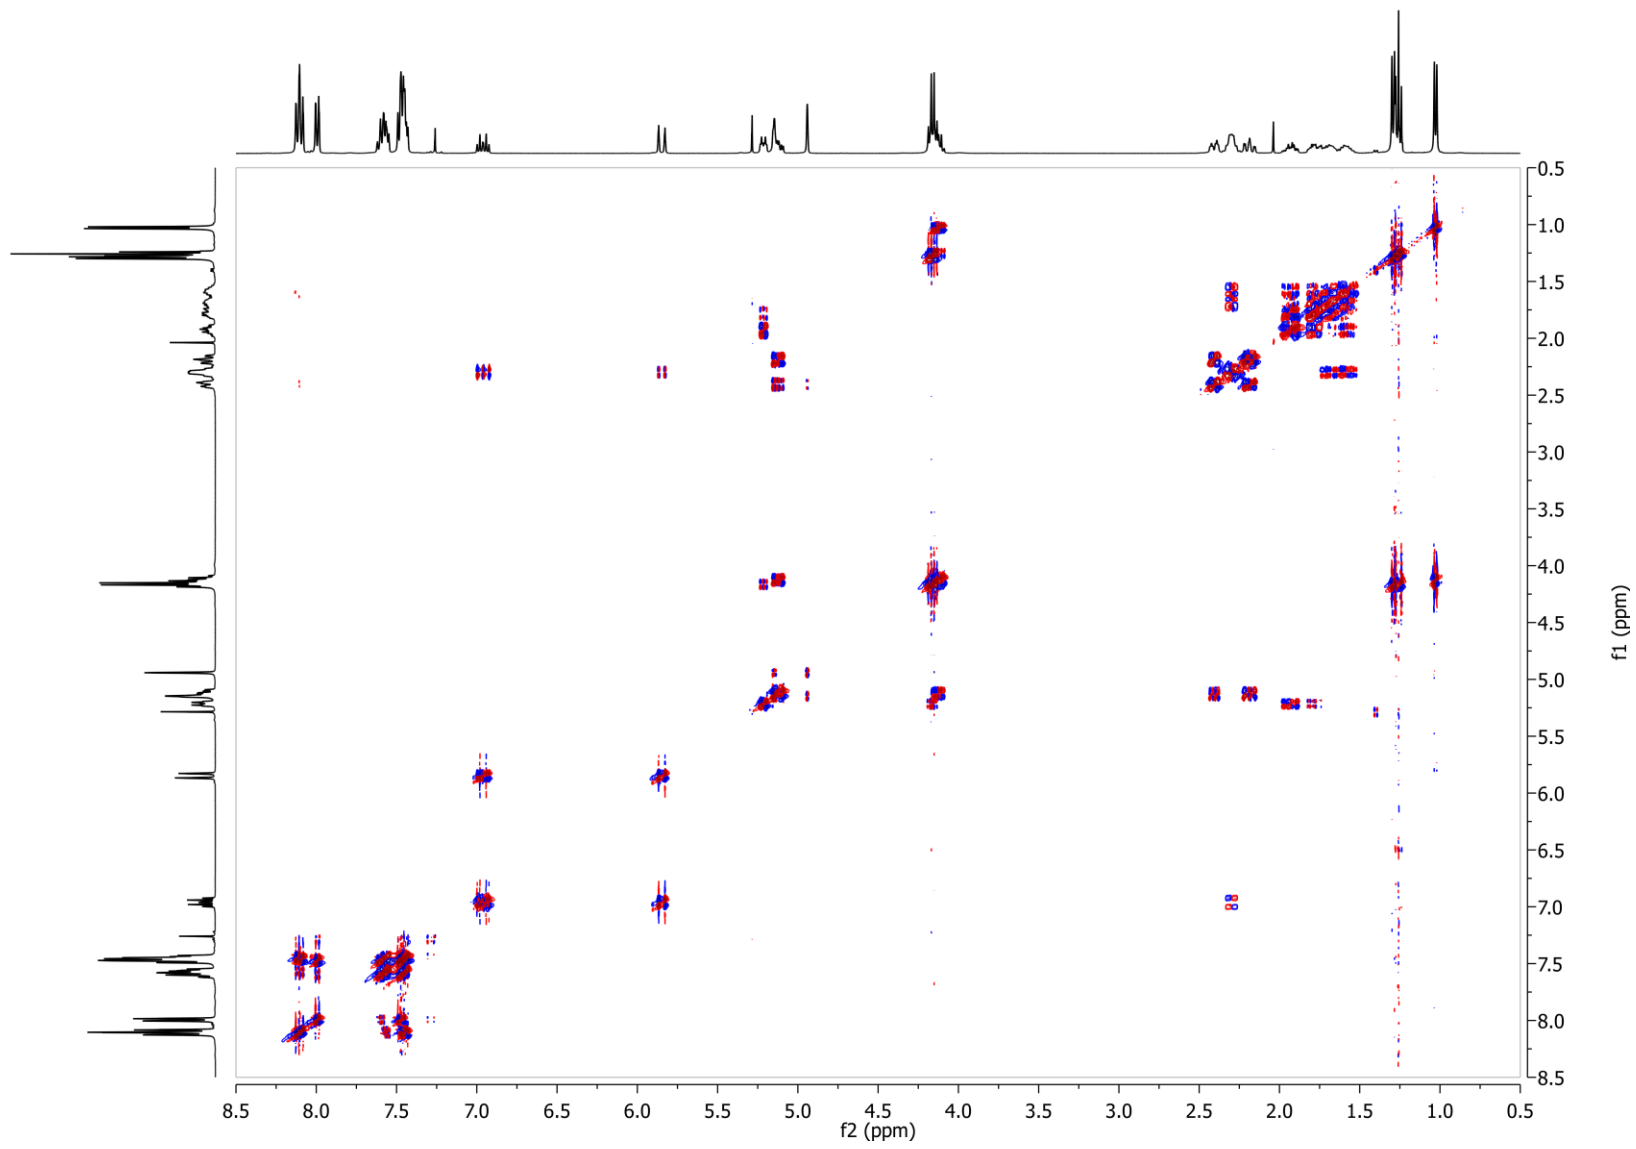

**Figure S47:**  $^1\text{H}$  NMR spectrum of synthetic  $(7R,8R,2E)$ -threo-8-[(3',6'-Dideoxy- $\alpha$ -L-arabino-hexopyranosyl)oxy]-7-hydroxy-2-nonenic acid ( $(7R,8R)$ -threo-asc-7OH- $\Delta$ C9,  $(7R,8R)$ -threo-**10a**) in  $\text{CD}_3\text{OD}$ .

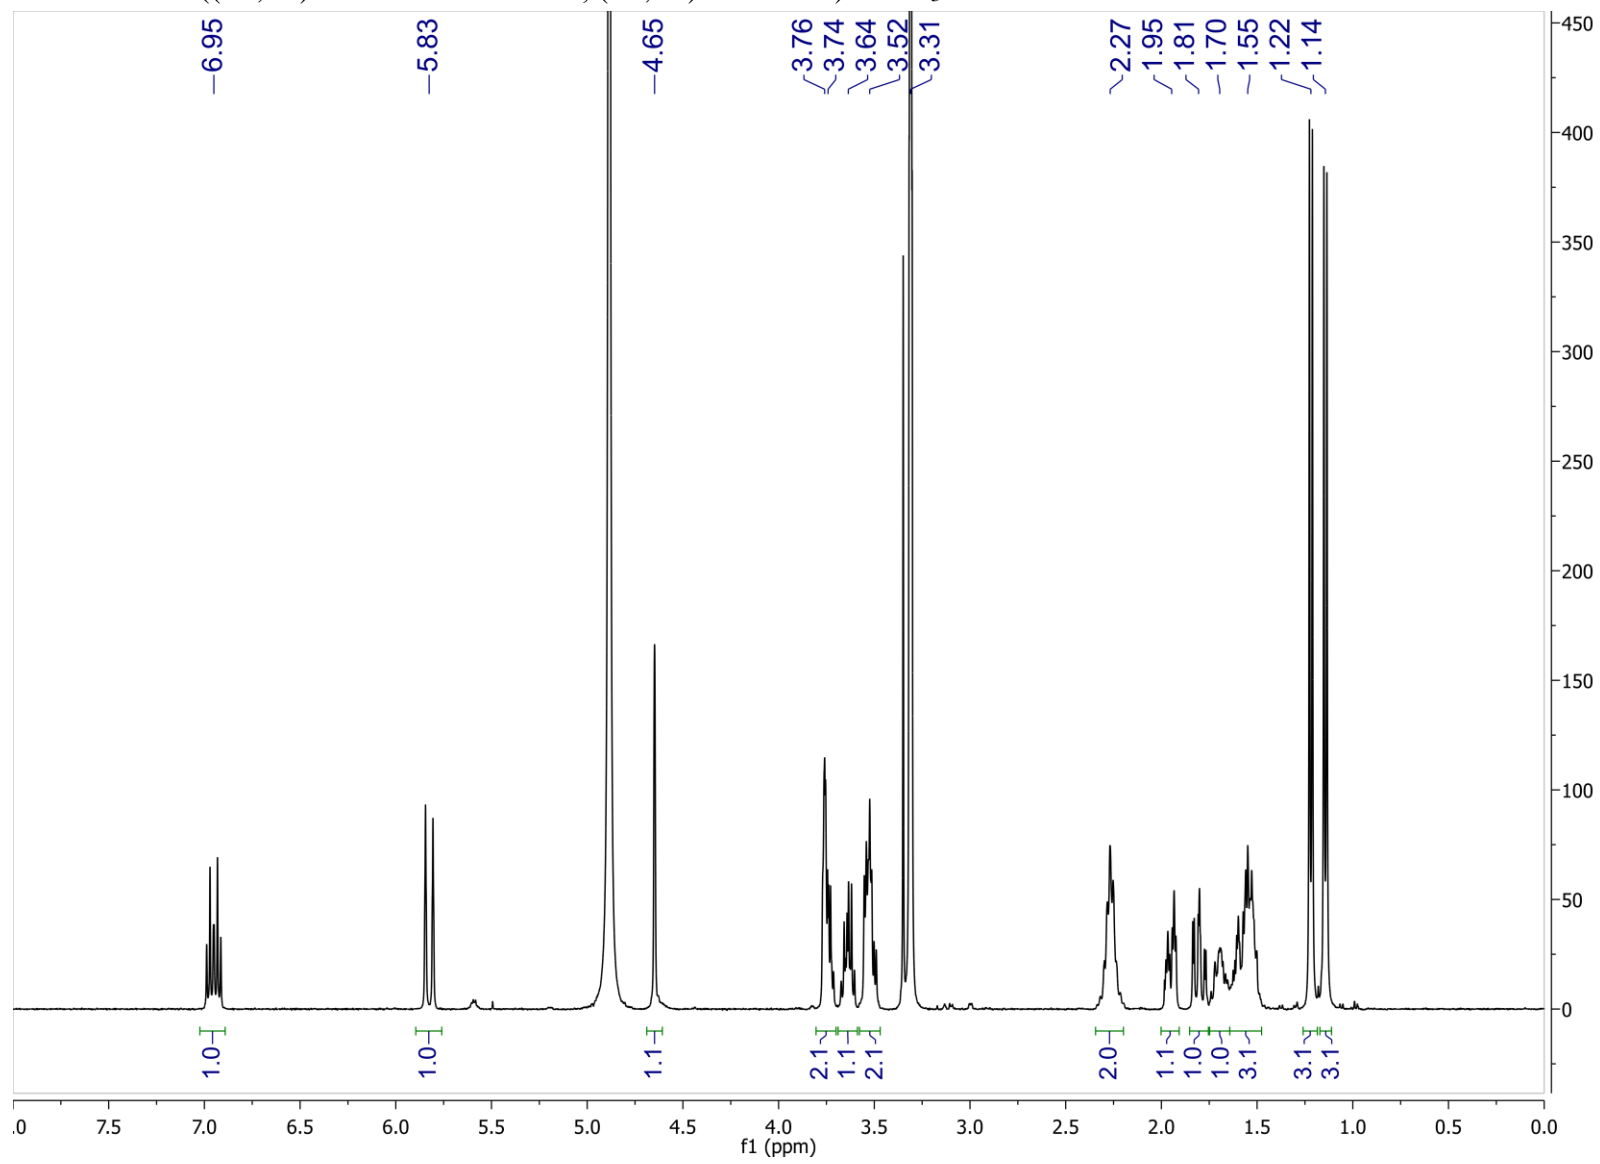

**Figure S48:**  $^{13}\text{C}$  NMR spectrum of synthetic  $(7R,8R,2E)$ -*threo*-8-[(3',6'-Dideoxy- $\alpha$ -L-*arabino*-hexopyranosyl)oxy]-7-hydroxy-2-nonenic acid ( $(7R,8R)$ -*threo*-asc-7OH- $\Delta$ C9,  $(7R,8R)$ -*threo*-**10a**) in  $\text{CD}_3\text{OD}$ .

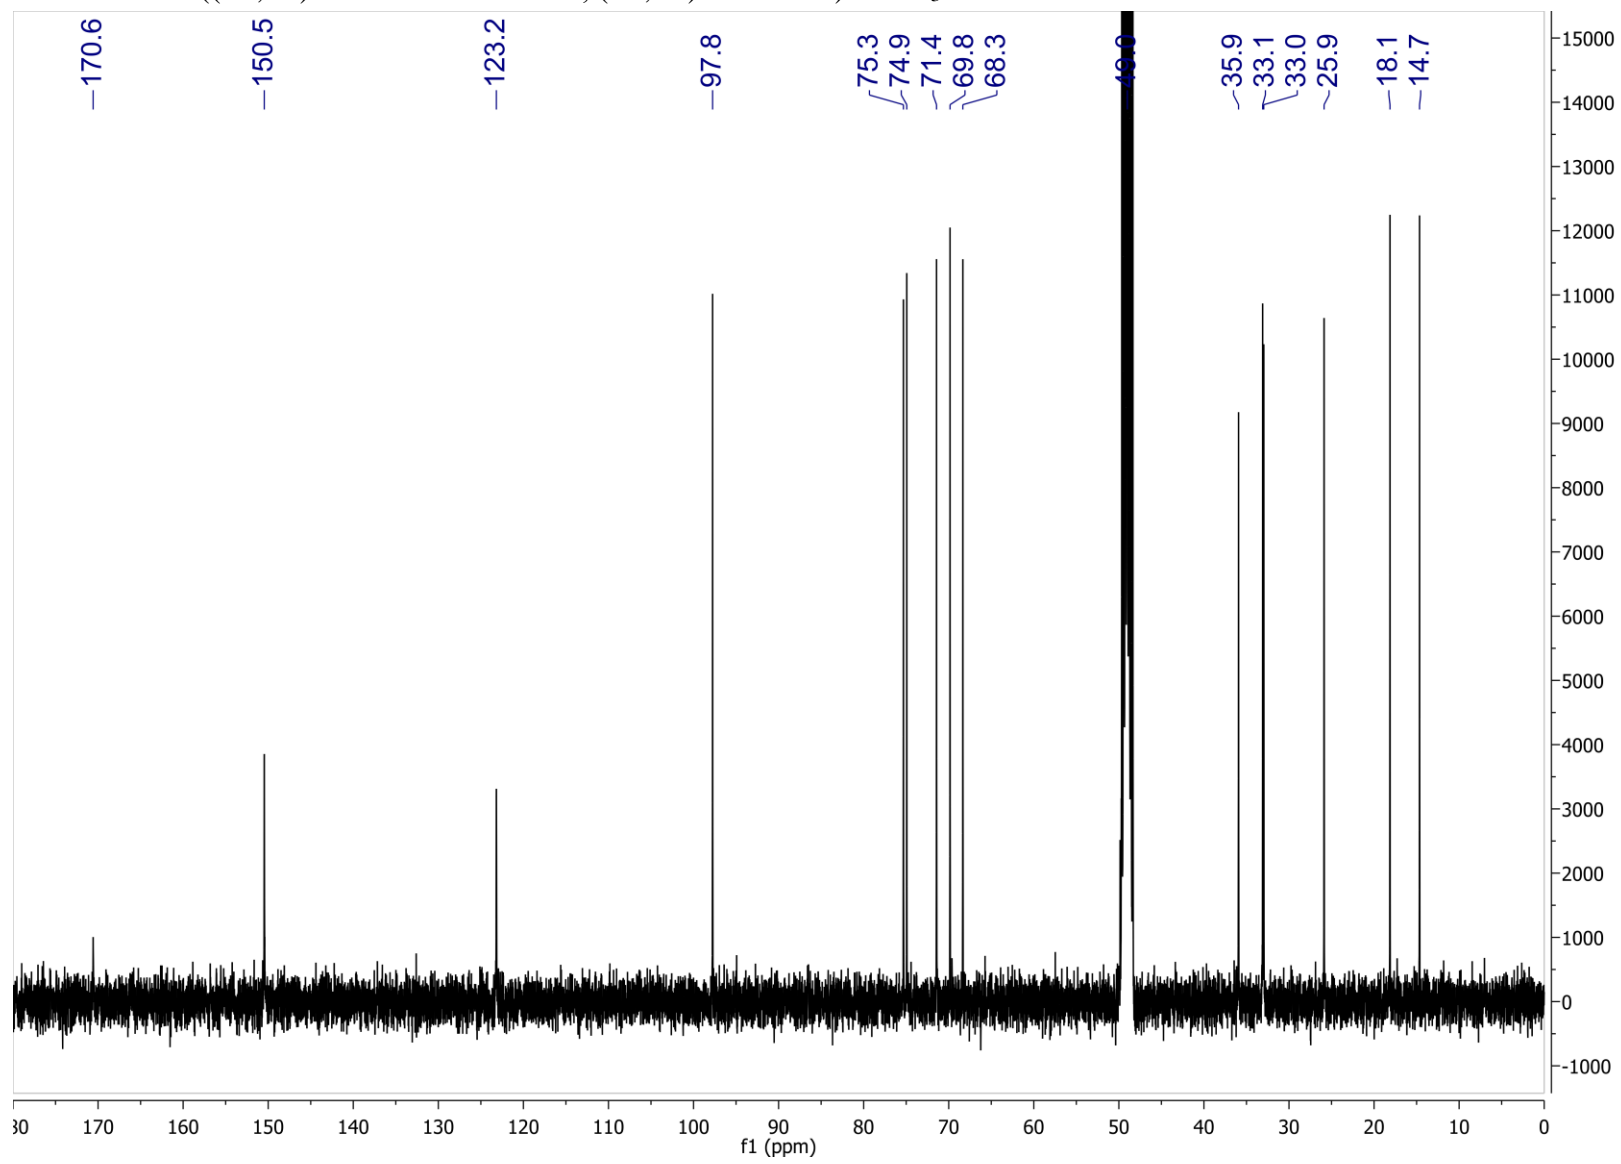

**Figure S49:** HSQC spectrum of synthetic *(7R,8R,2E)*-threo-8-[(3',6'-Dideoxy- $\alpha$ -L-arabino-hexopyranosyl)oxy]-7-hydroxy-2-nonenic acid (*(7R,8R)*-threo-asc-7OH- $\Delta$ C9, *(7R,8R)*-threo-**10a**) in CD<sub>3</sub>OD.

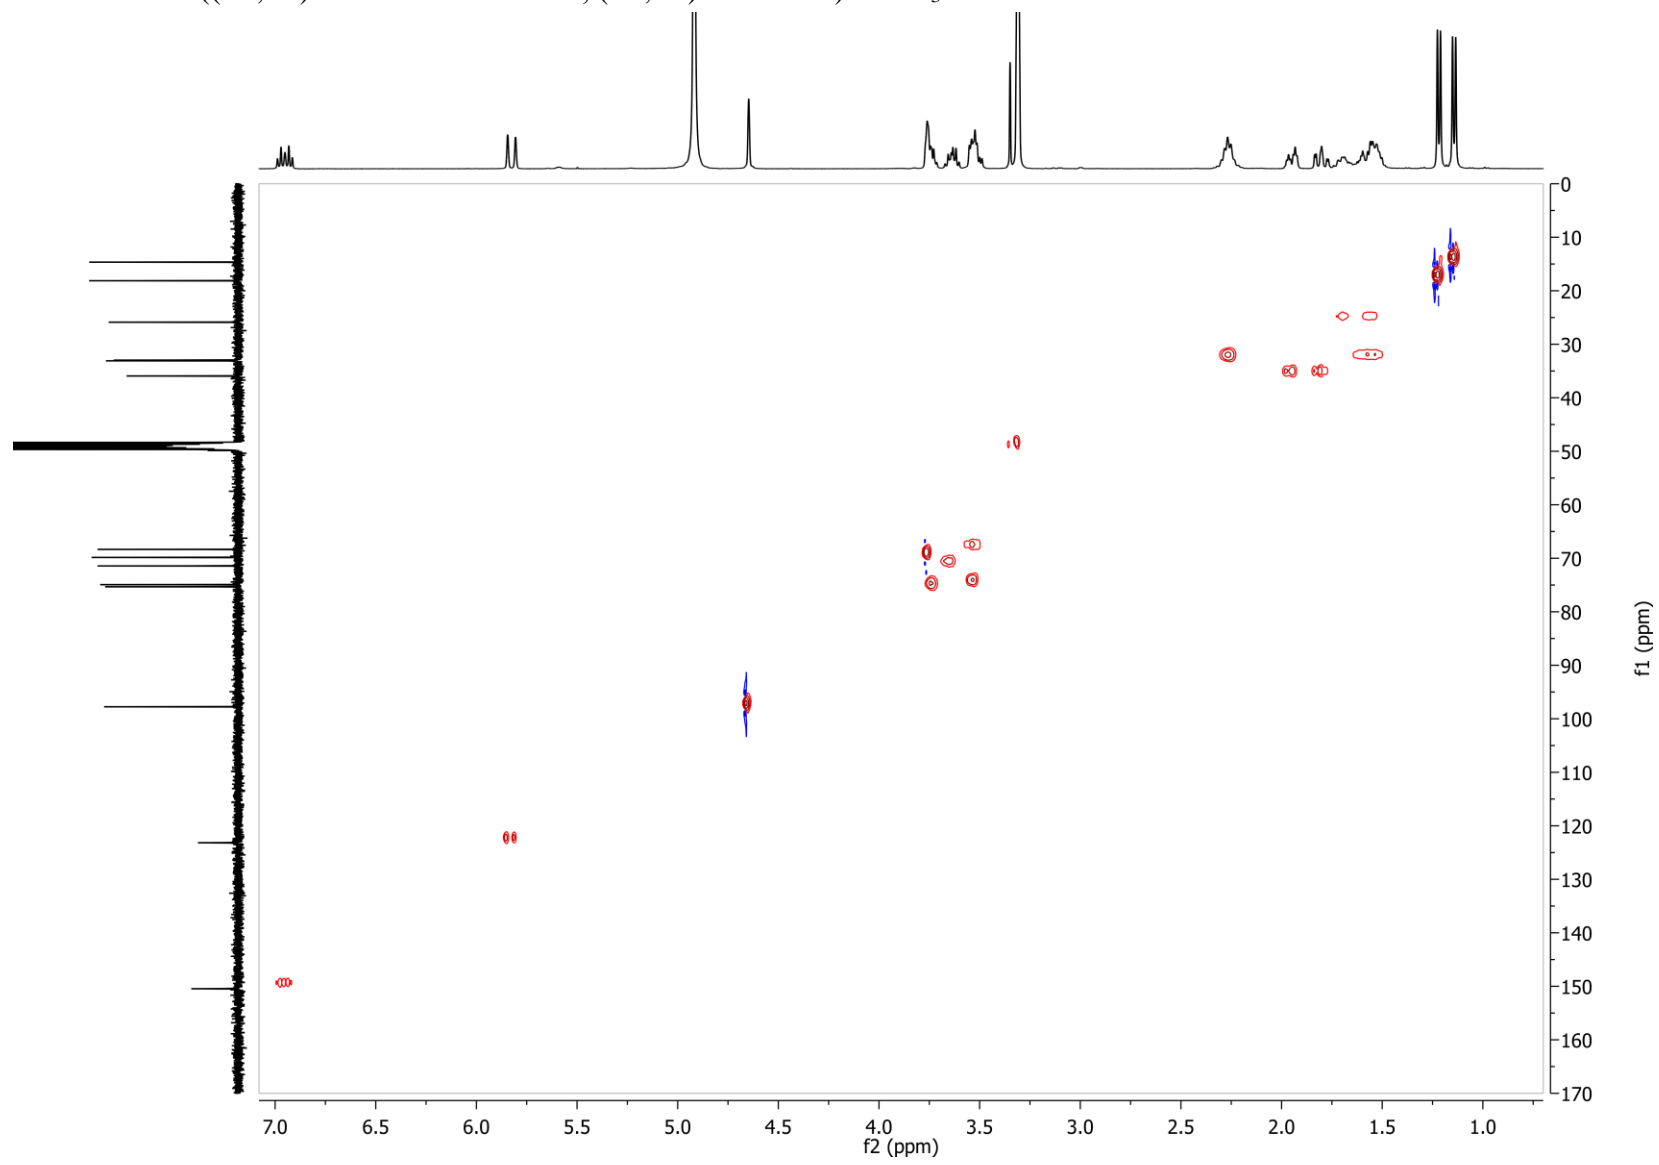

**Figure S50:** dqf-COSY spectrum of synthetic (7*R*,8*R*,2*E*)-*threo*-8-[(3',6'-Dideoxy- $\alpha$ -L-*arabino*-hexopyranosyl)oxy]-7-hydroxy-2-nonenic acid ((7*R*,8*R*)-*threo*-asc-7OH- $\Delta$ C9, (7*R*,8*R*)-*threo*-**10a**) in CD<sub>3</sub>OD.

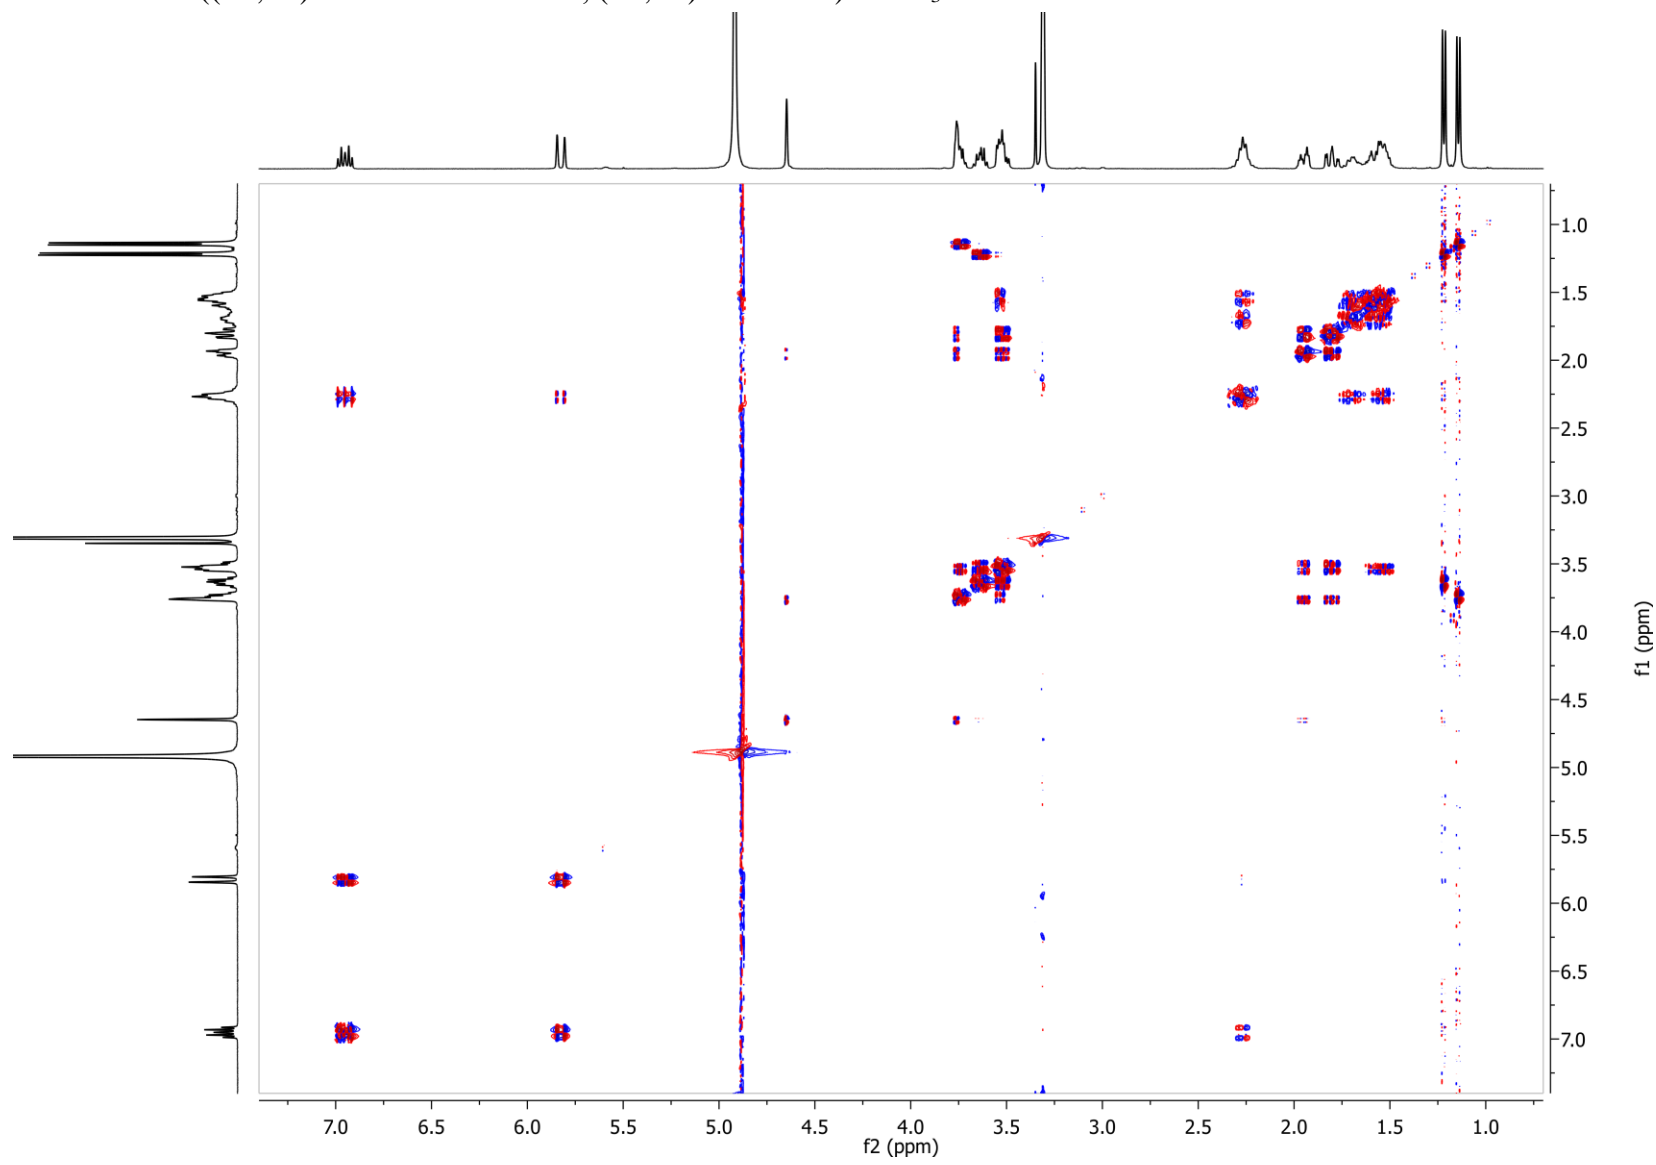

**Figure S51:**  $^1\text{H}$  NMR spectrum of synthetic 2-((6*R*)-6-((*R*)-1-[(3,6-dideoxy- $\alpha$ -L-*arabino*-hexopyranosyl)oxy]ethyl)tetrahydro-2H-pyran-2-yl)acetic acid (**23a**) in  $\text{CD}_3\text{OD}$ .

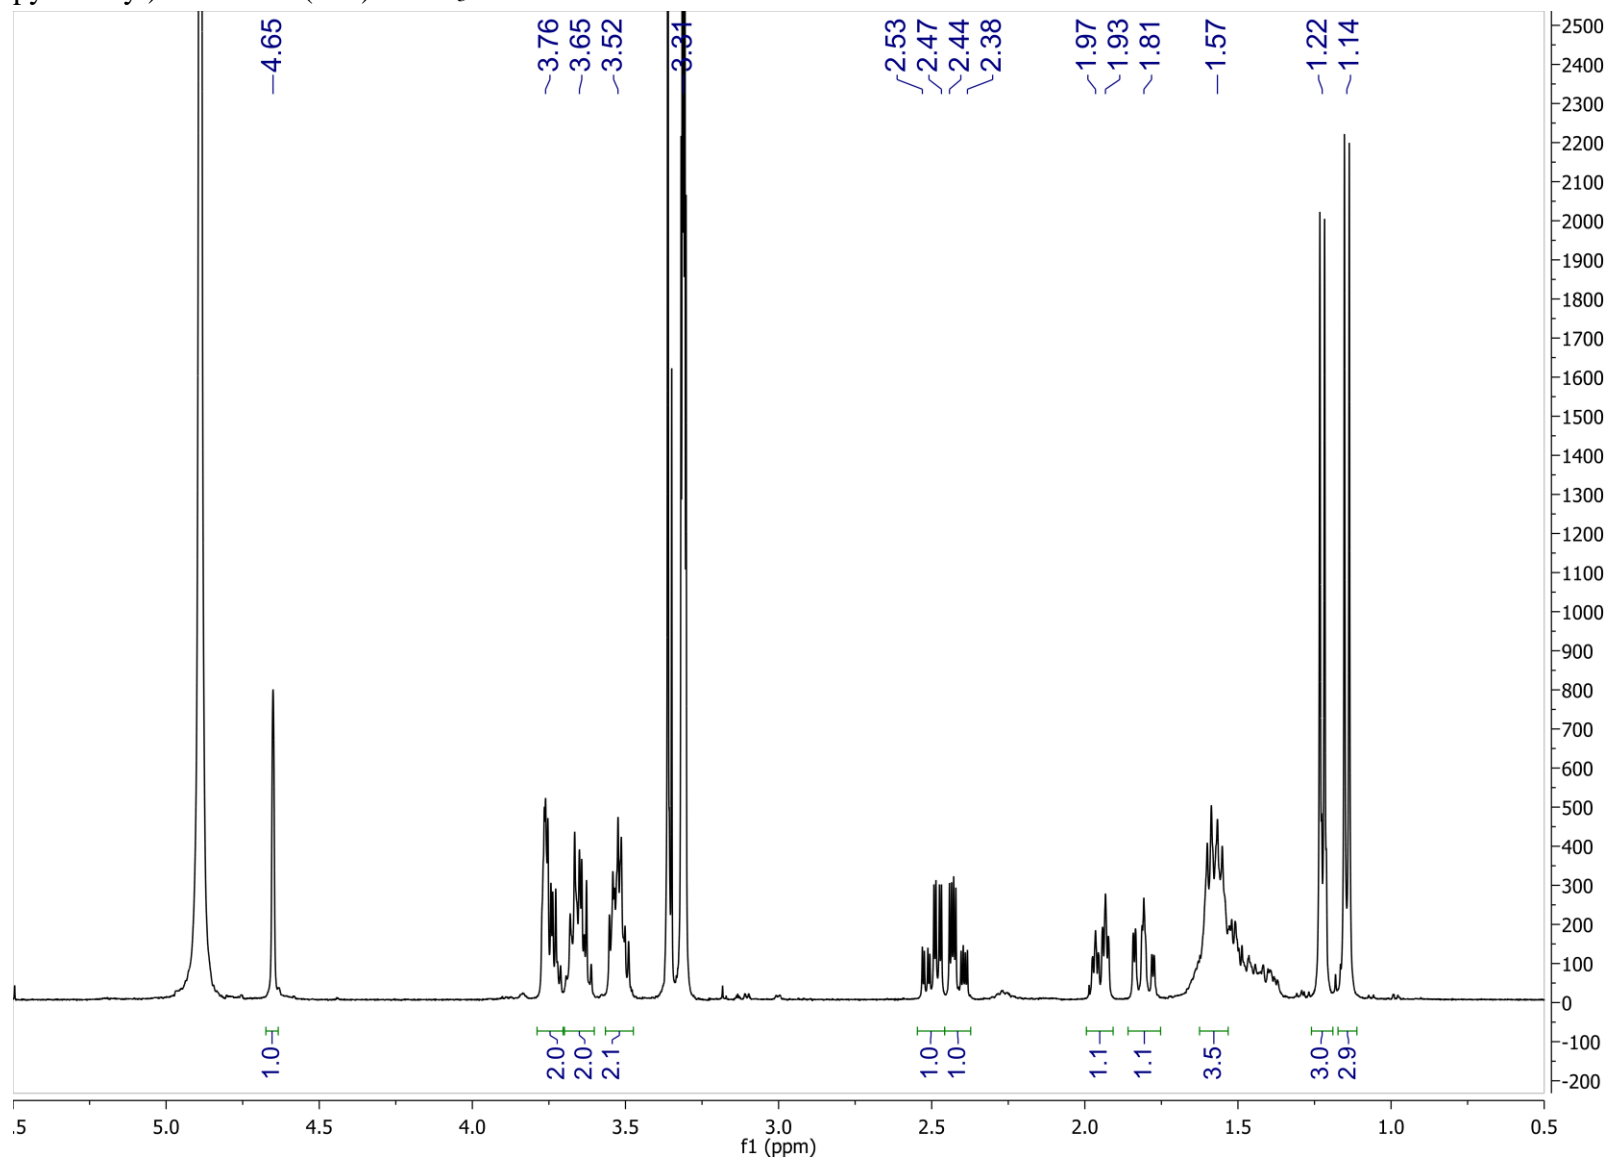



**Figure S52:**  $^{13}\text{C}$  NMR spectrum of synthetic 2-((6*R*)-6-((*R*)-1-[(3,6-dideoxy- $\alpha$ -L-*arabino*-hexopyranosyl)oxy]ethyl)tetrahydro-2H-pyran-2-yl)acetic acid (**23a**) in  $\text{CD}_3\text{OD}$ .

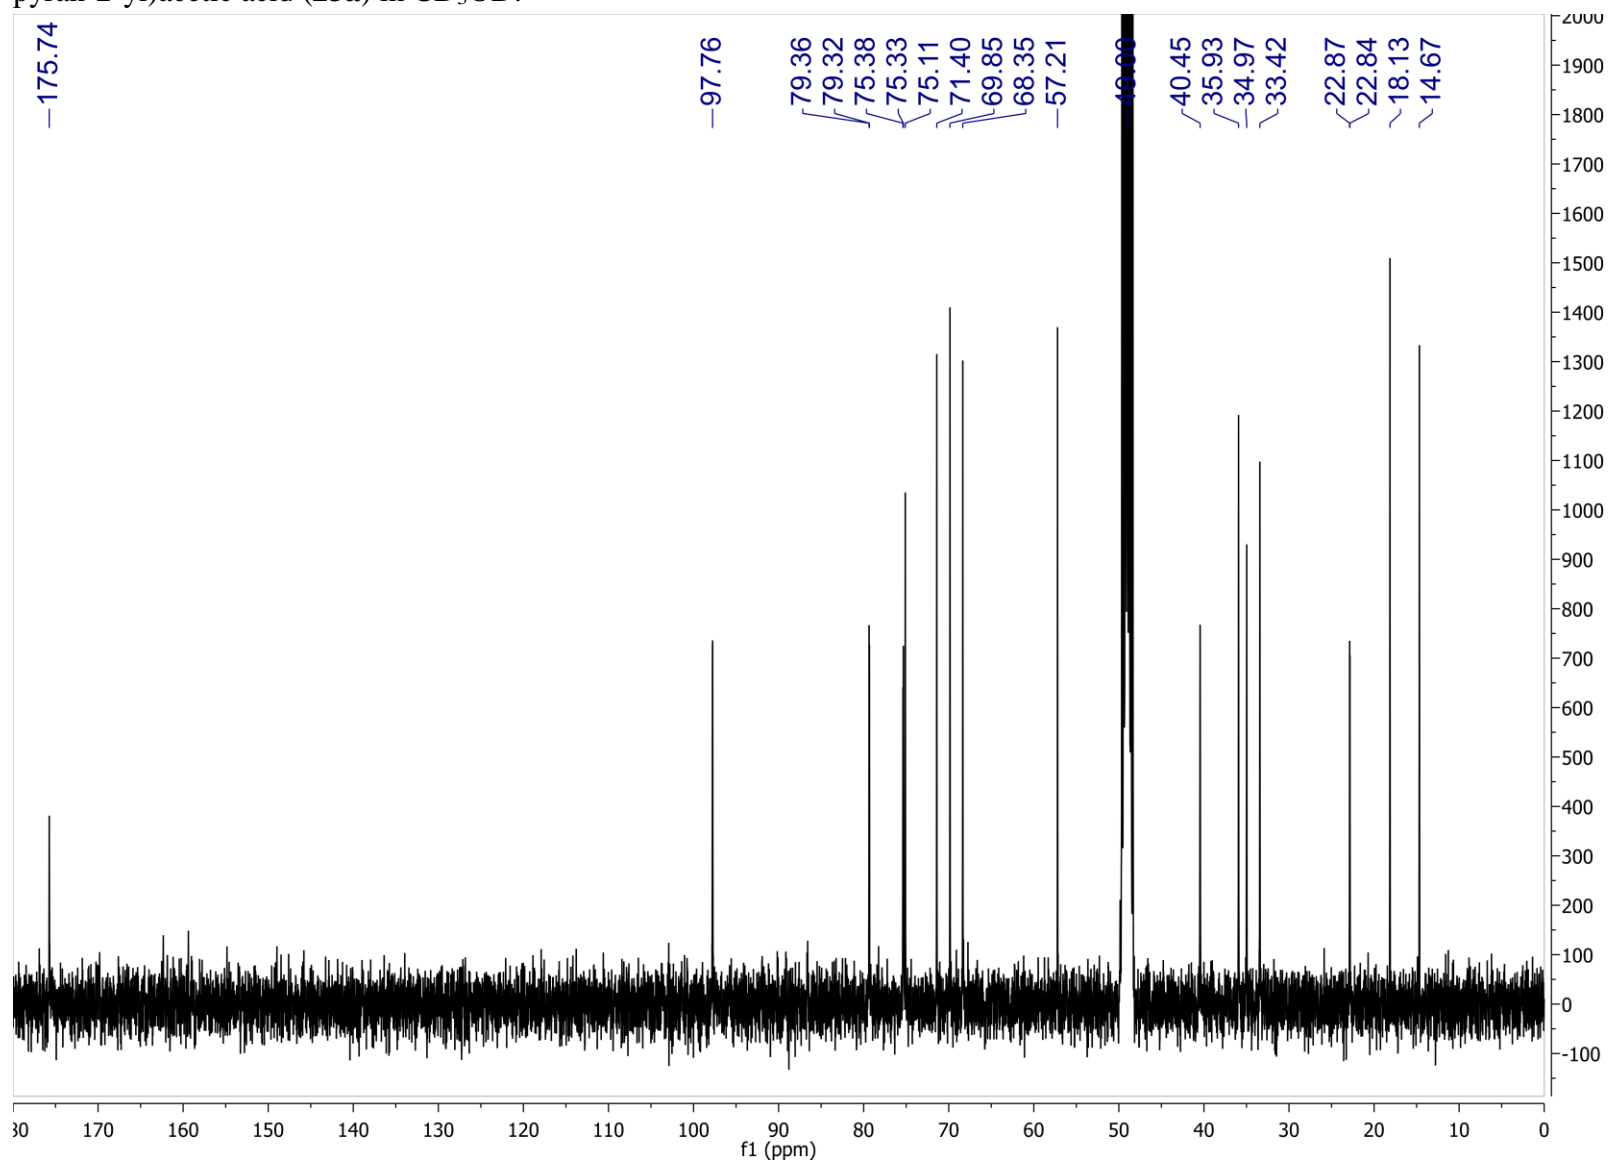

**Figure S53:** dqf-COSY spectrum of synthetic 2-((6*R*)-6-((*R*)-1-[(3,6-dideoxy- $\alpha$ -L-*arabino*-hexopyranosyl)oxy]ethyl)tetrahydro-2H-pyran-2-yl)acetic acid (**23a**) in CD<sub>3</sub>OD.

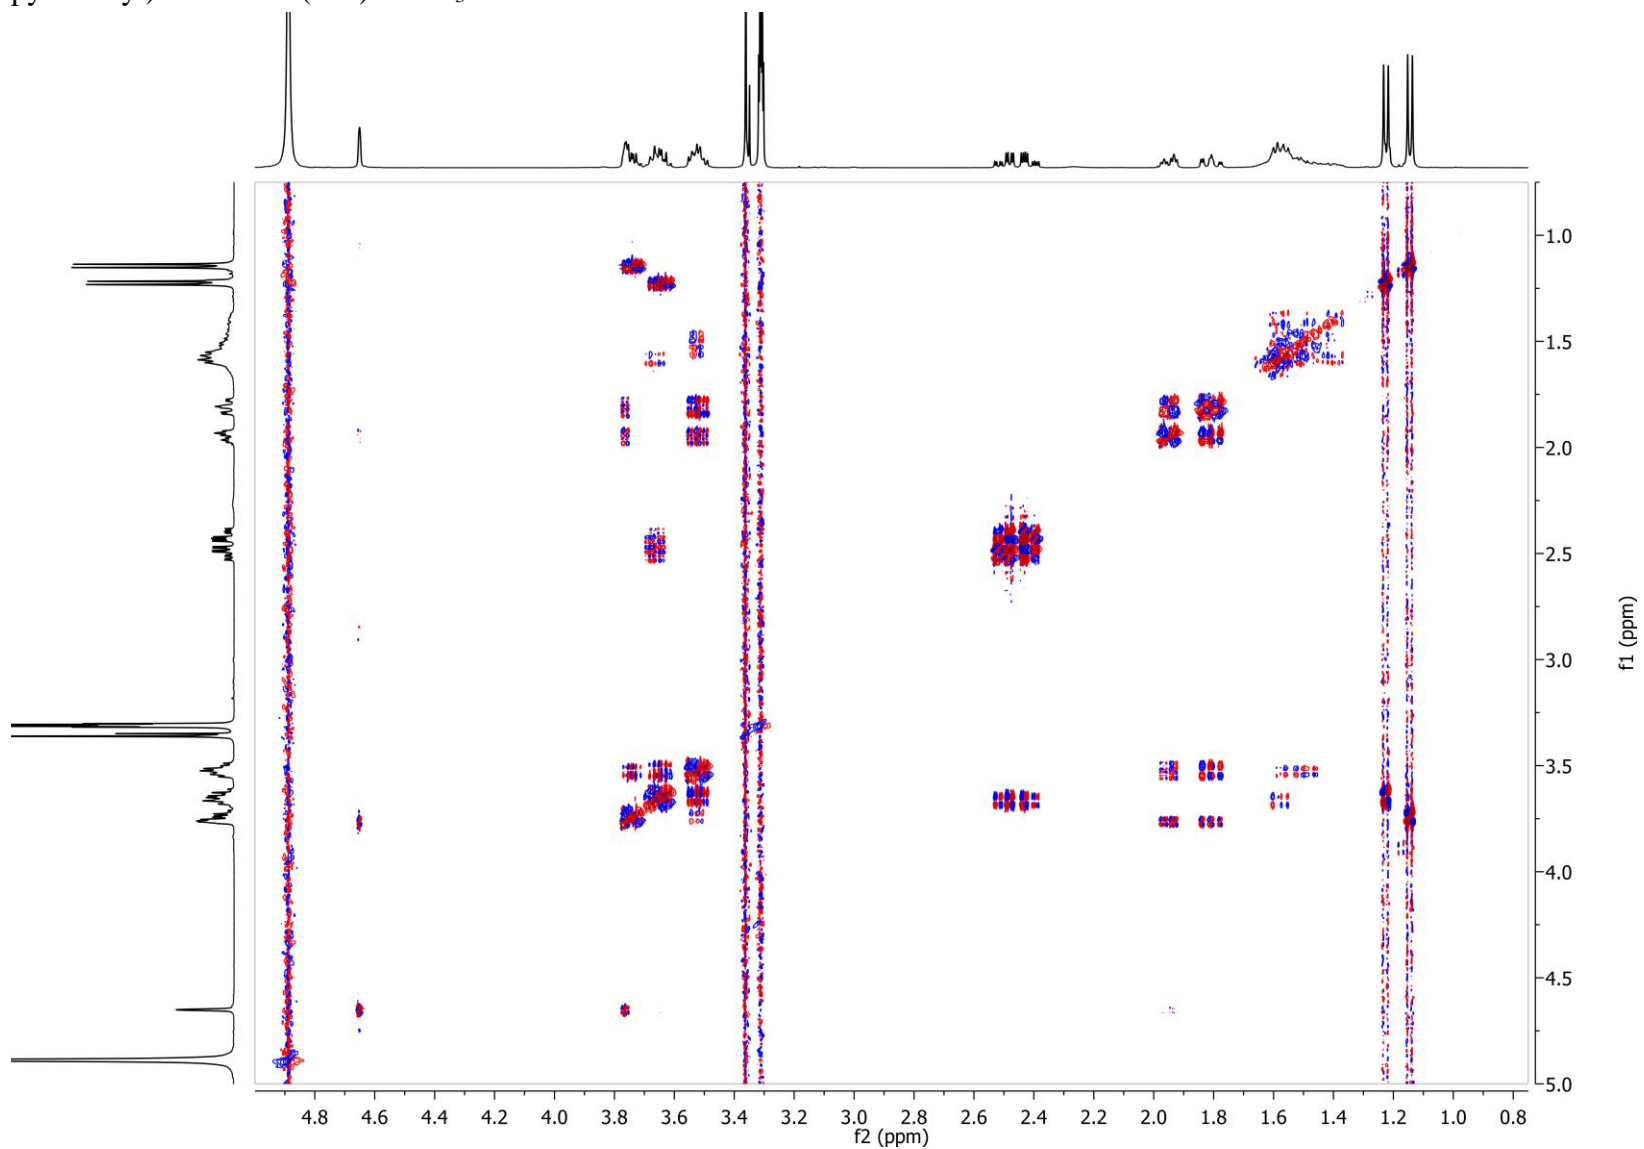

**Figure S54:** HMQC spectrum of synthetic 2-((6*R*)-6-((*R*)-1-[(3,6-dideoxy- $\alpha$ -L-*arabino*-hexopyranosyl)oxy]ethyl)tetrahydro-2H-pyran-2-yl)acetic acid (**23a**) in CD<sub>3</sub>OD.

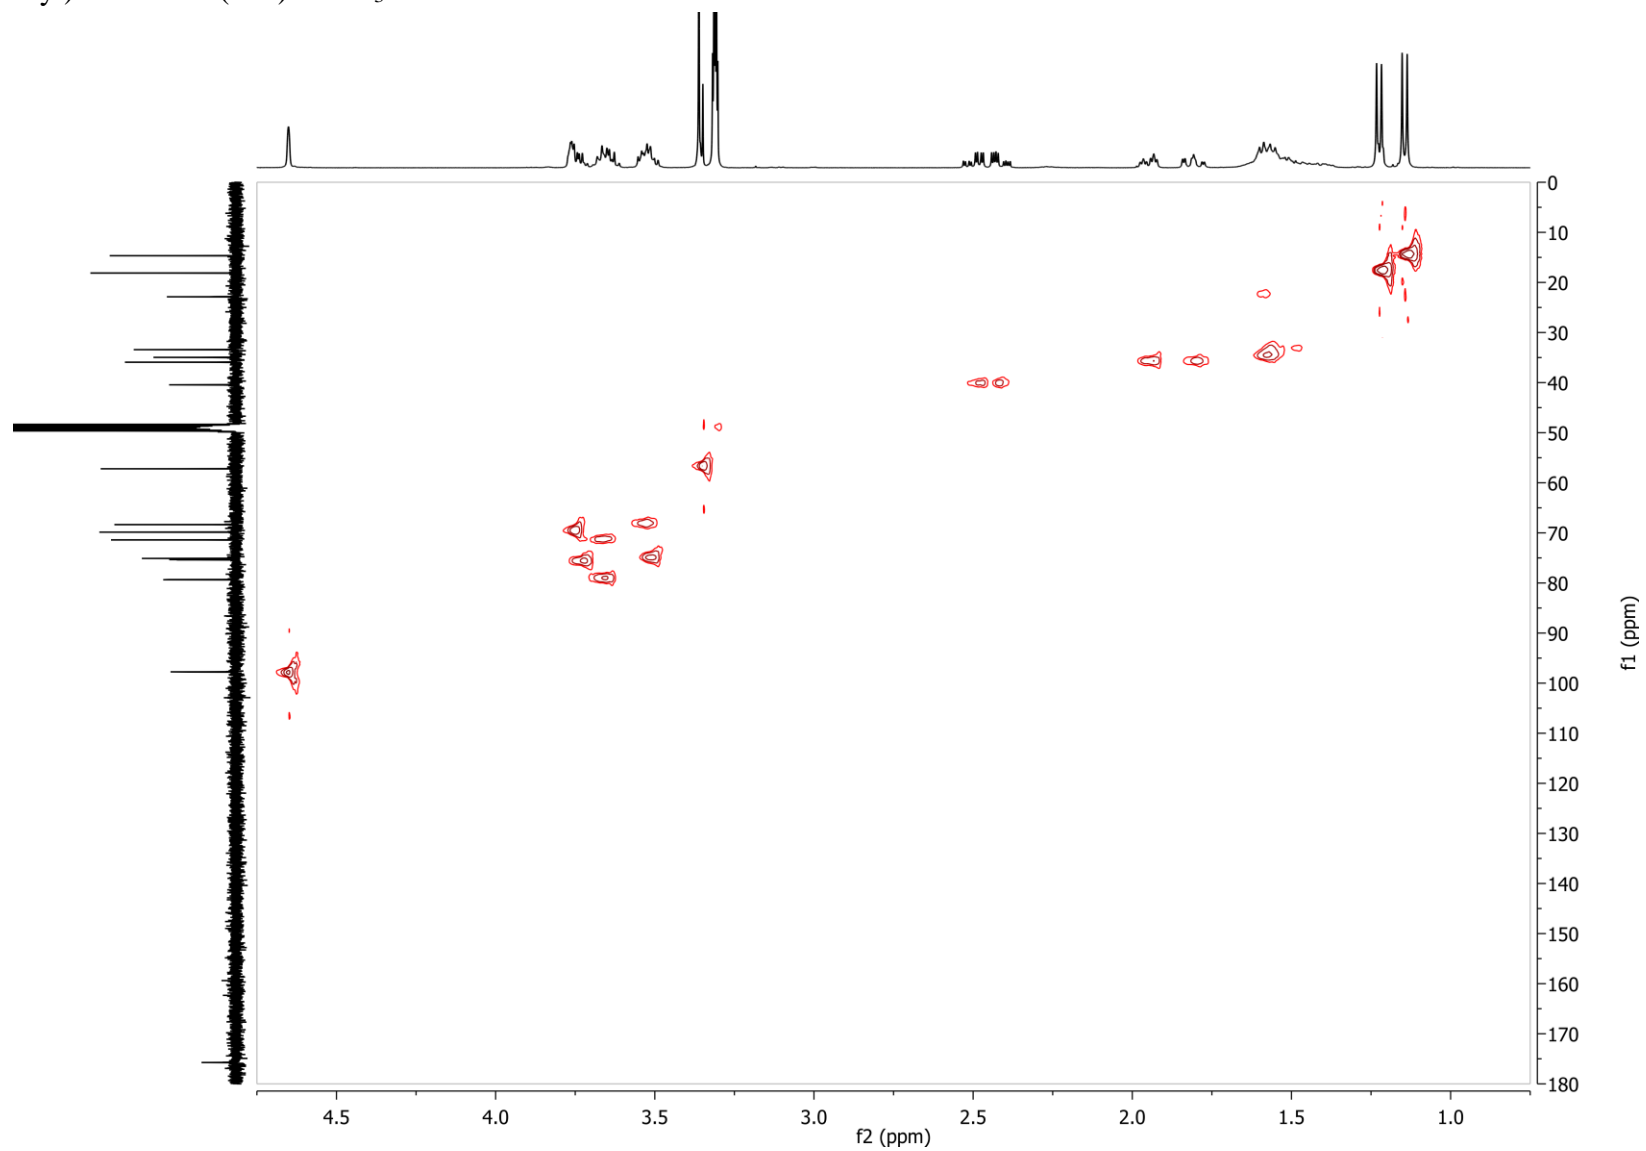

**Figure S55:**  $^1\text{H}$  NMR spectrum of synthetic (7*S*,8*R*,2*E*)-erythro-8-[(3',6'-Dideoxy- $\alpha$ -L-arabino-hexopyranosyl)oxy]-7-hydroxy-2-nonenic acid ((7*S*,8*R*)-erythro-asc-7OH- $\Delta$ C9, (7*S*,8*R*)-erythro-10b) in  $\text{CD}_3\text{OD}$ .

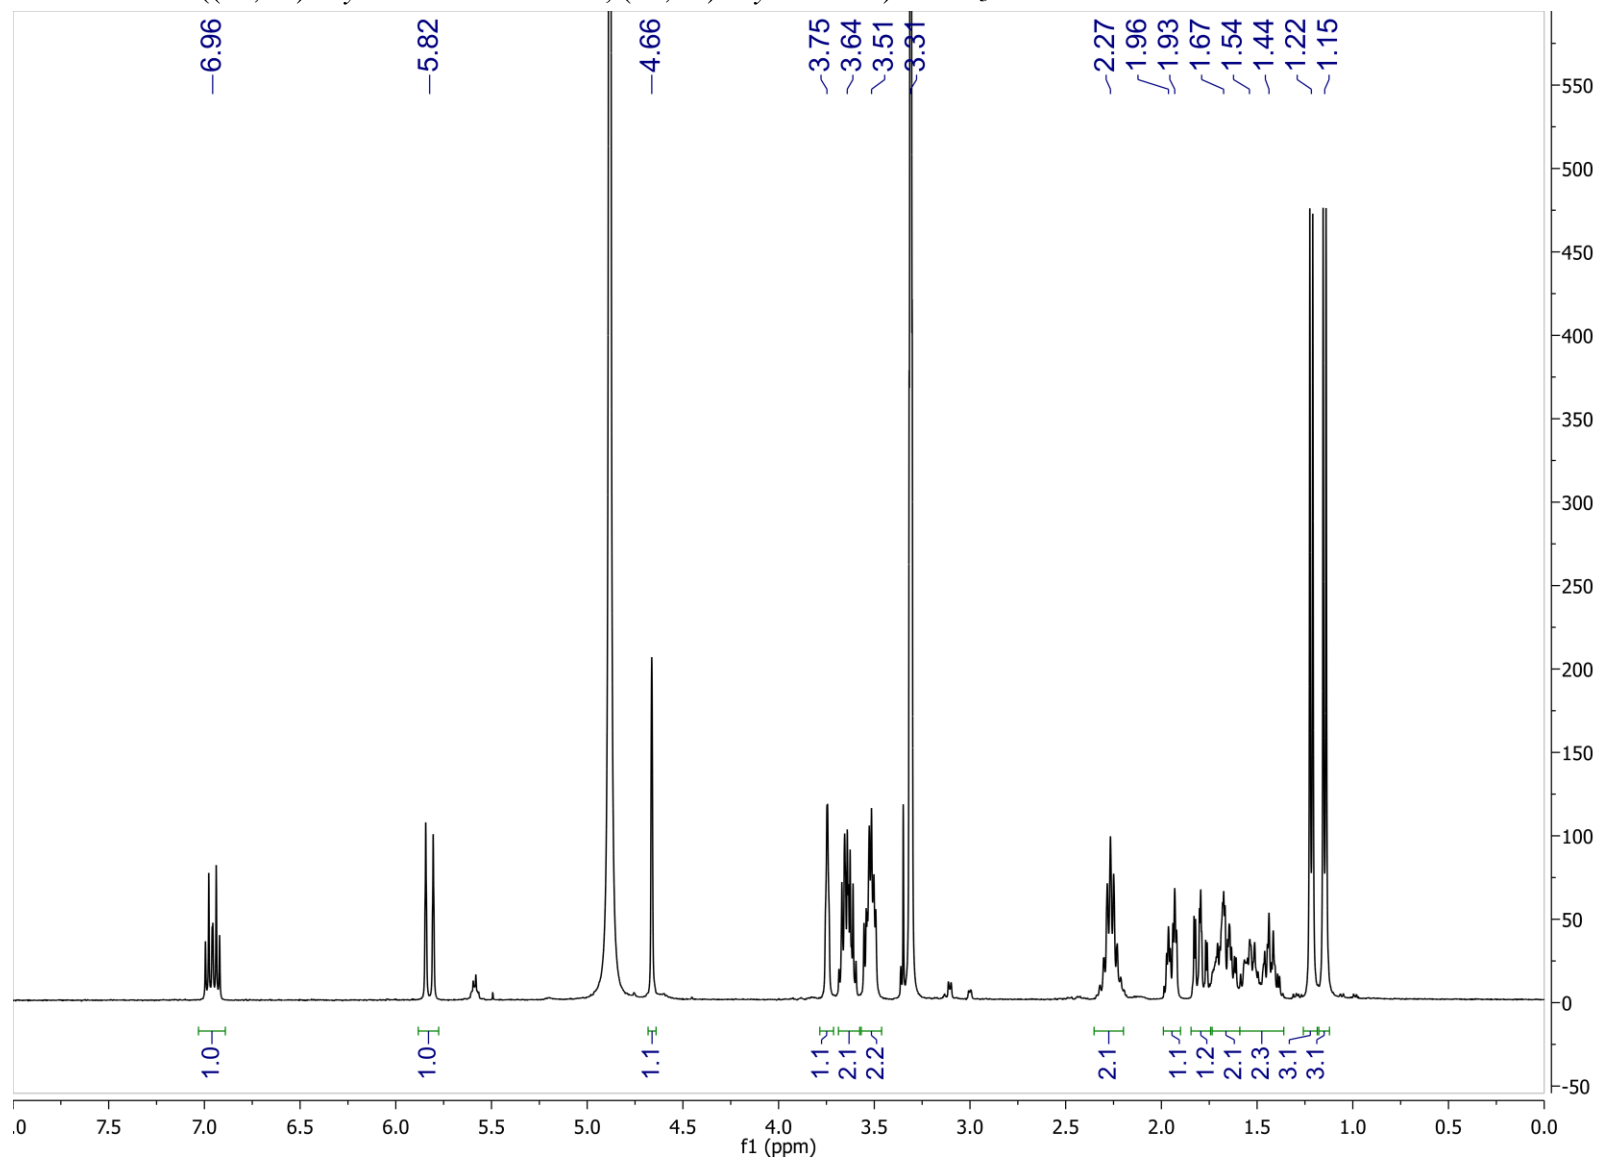

**Figure S56:**  $^{13}\text{C}$  NMR spectrum of synthetic *(7S,8R,2E)*-erythro-8-[(3',6'-Dideoxy- $\alpha$ -L-arabino-hexopyranosyl)oxy]-7-hydroxy-2-nonenic acid (*(7S,8R)*-erythro-asc-7OH- $\Delta$ C9, *(7S,8R)*-erythro-**10b**) in  $\text{CD}_3\text{OD}$ .

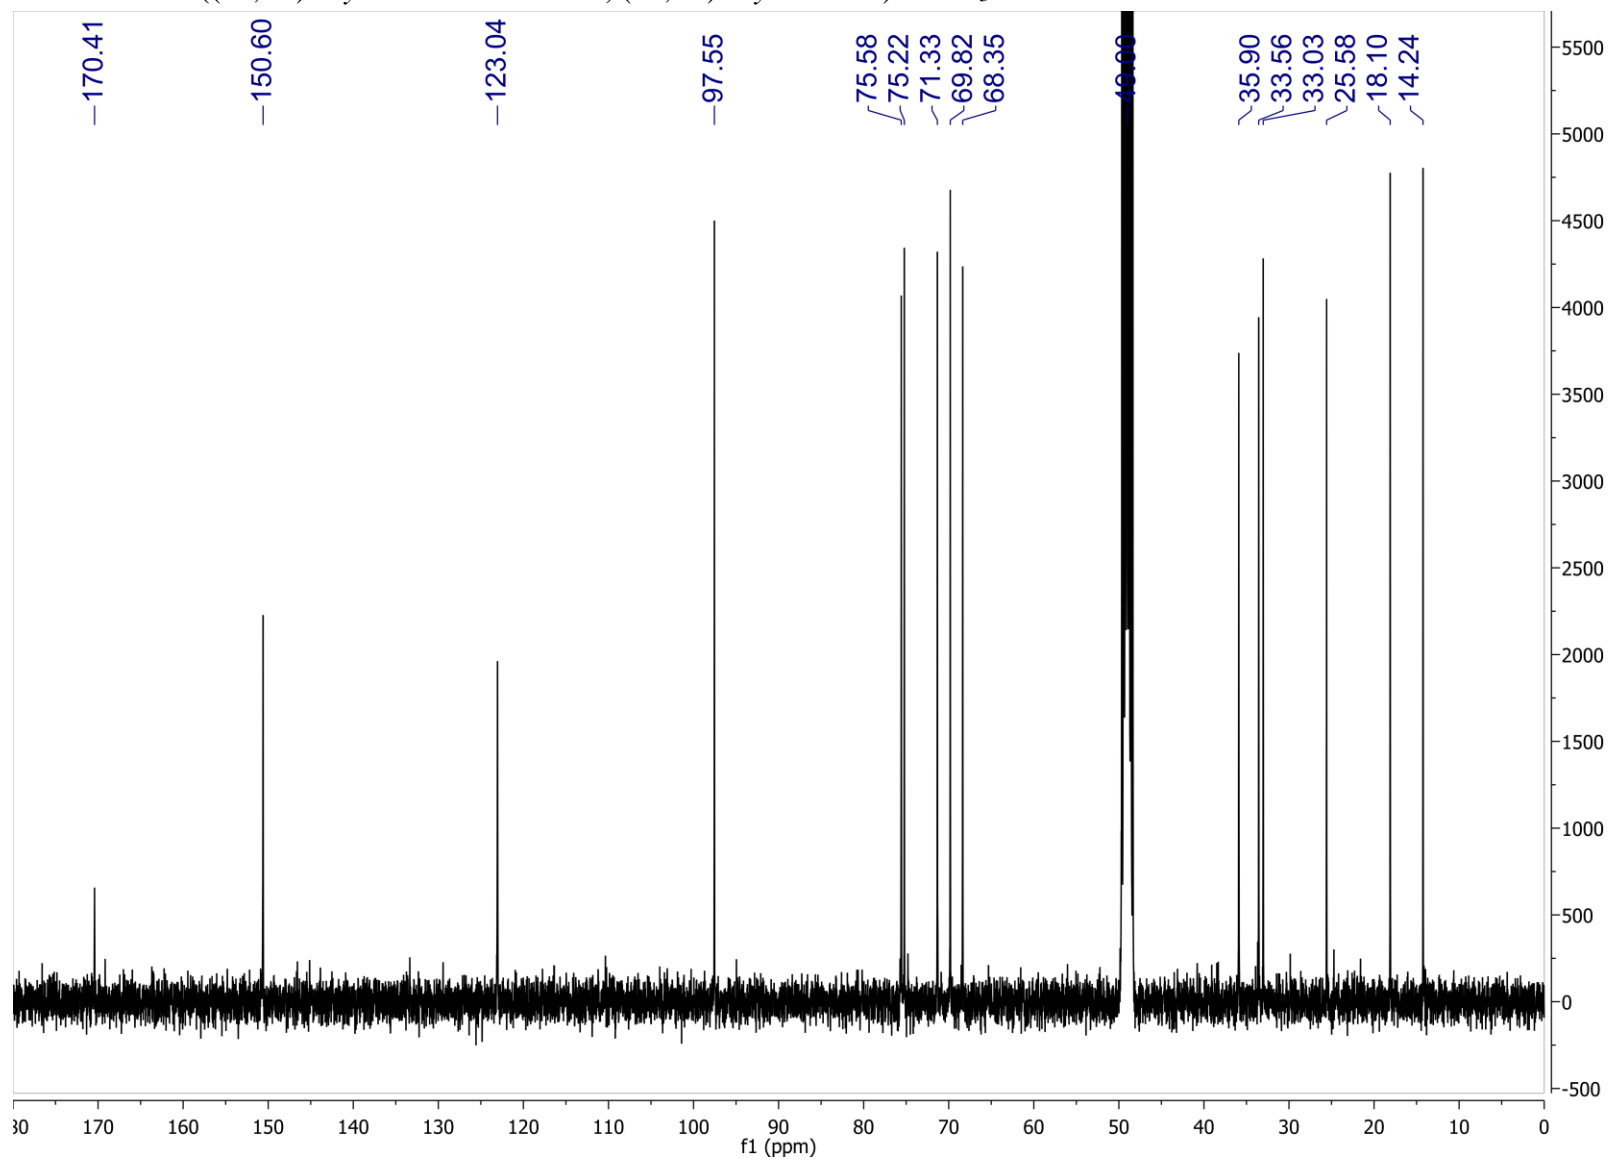

**Figure S57:** HSQC spectrum of synthetic *(7S,8R,2E)*-erythro-8-[(3',6'-Dideoxy- $\alpha$ -L-arabino-hexopyranosyl)oxy]-7-hydroxy-2-nonenic acid (*(7S,8R)*-erythro-asc-7OH- $\Delta$ C9, *(7S,8R)*-erythro-10b) in CD<sub>3</sub>OD.

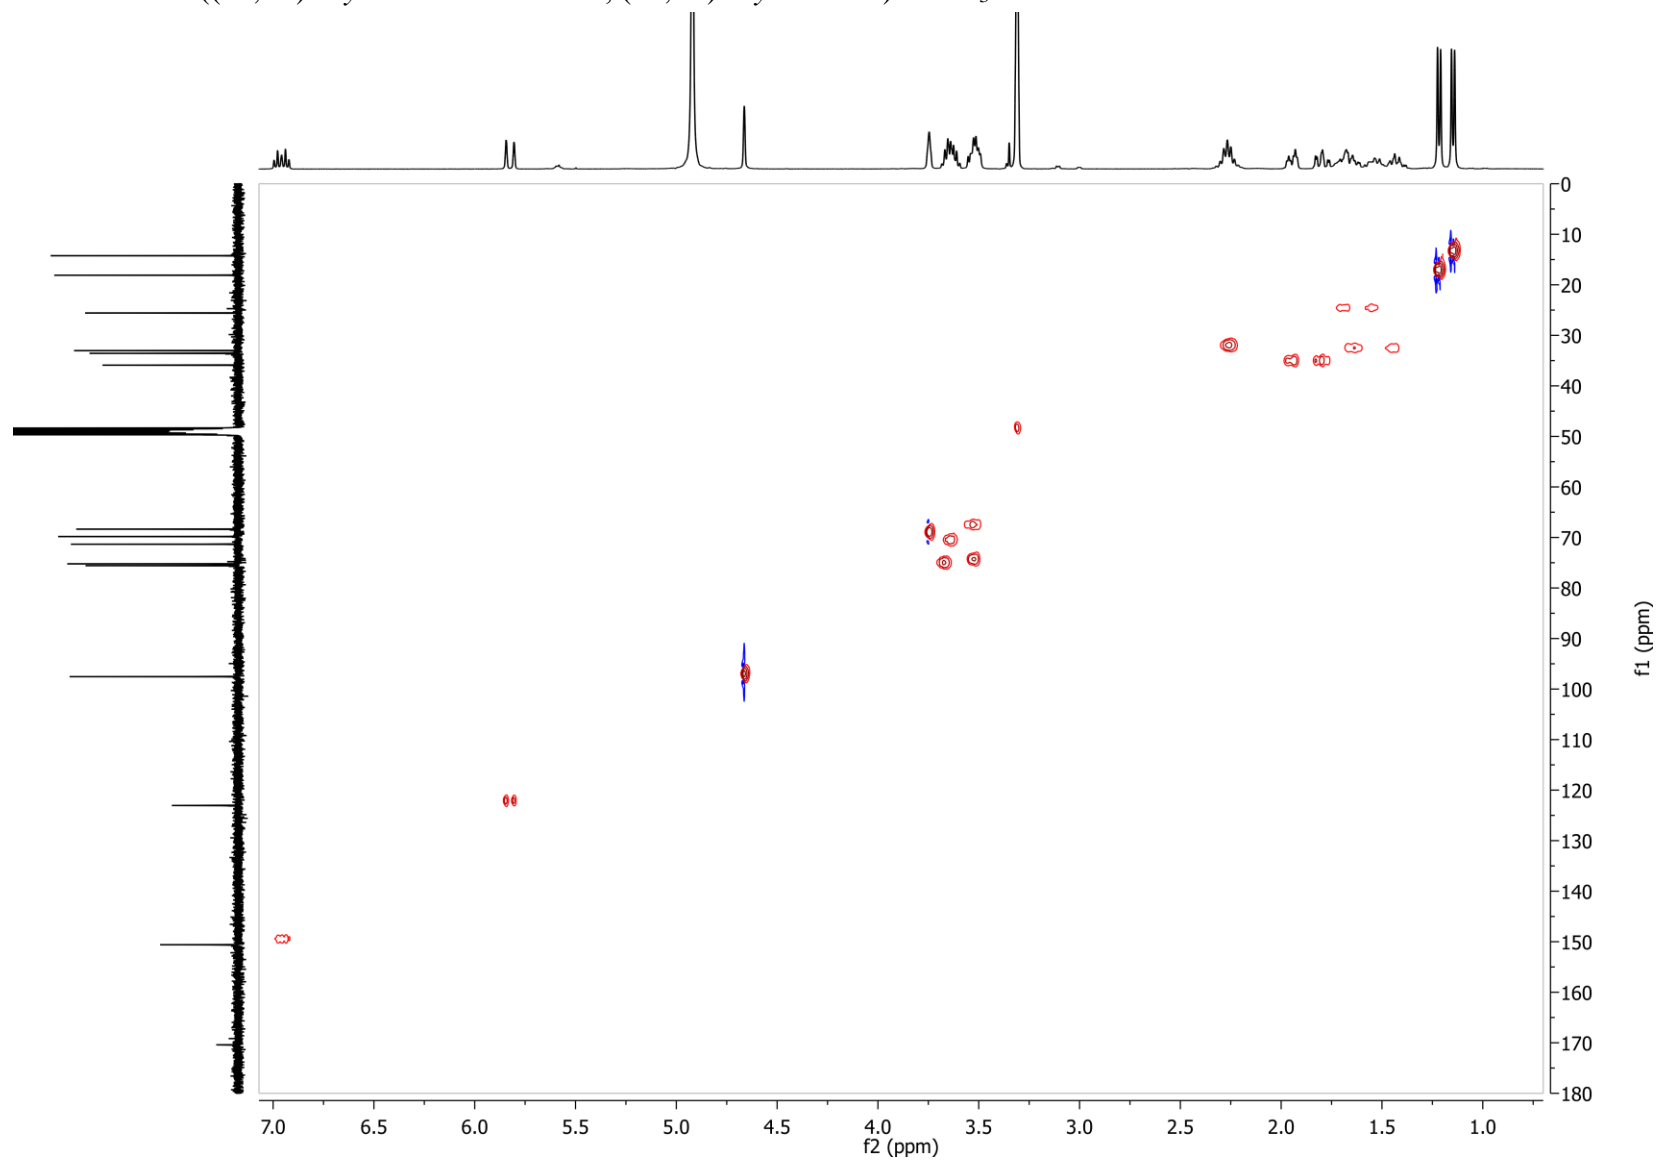

**Figure S58:** dqf-COSY spectrum of synthetic (7*S*,8*R*,2*E*)-erythro-8-[(3',6'-Dideoxy- $\alpha$ -L-arabino-hexopyranosyl)oxy]-7-hydroxy-2-nonenic acid ((7*S*,8*R*)-erythro-asc-7OH- $\Delta$ C9, (7*S*,8*R*)-erythro-10b) in CD<sub>3</sub>OD.

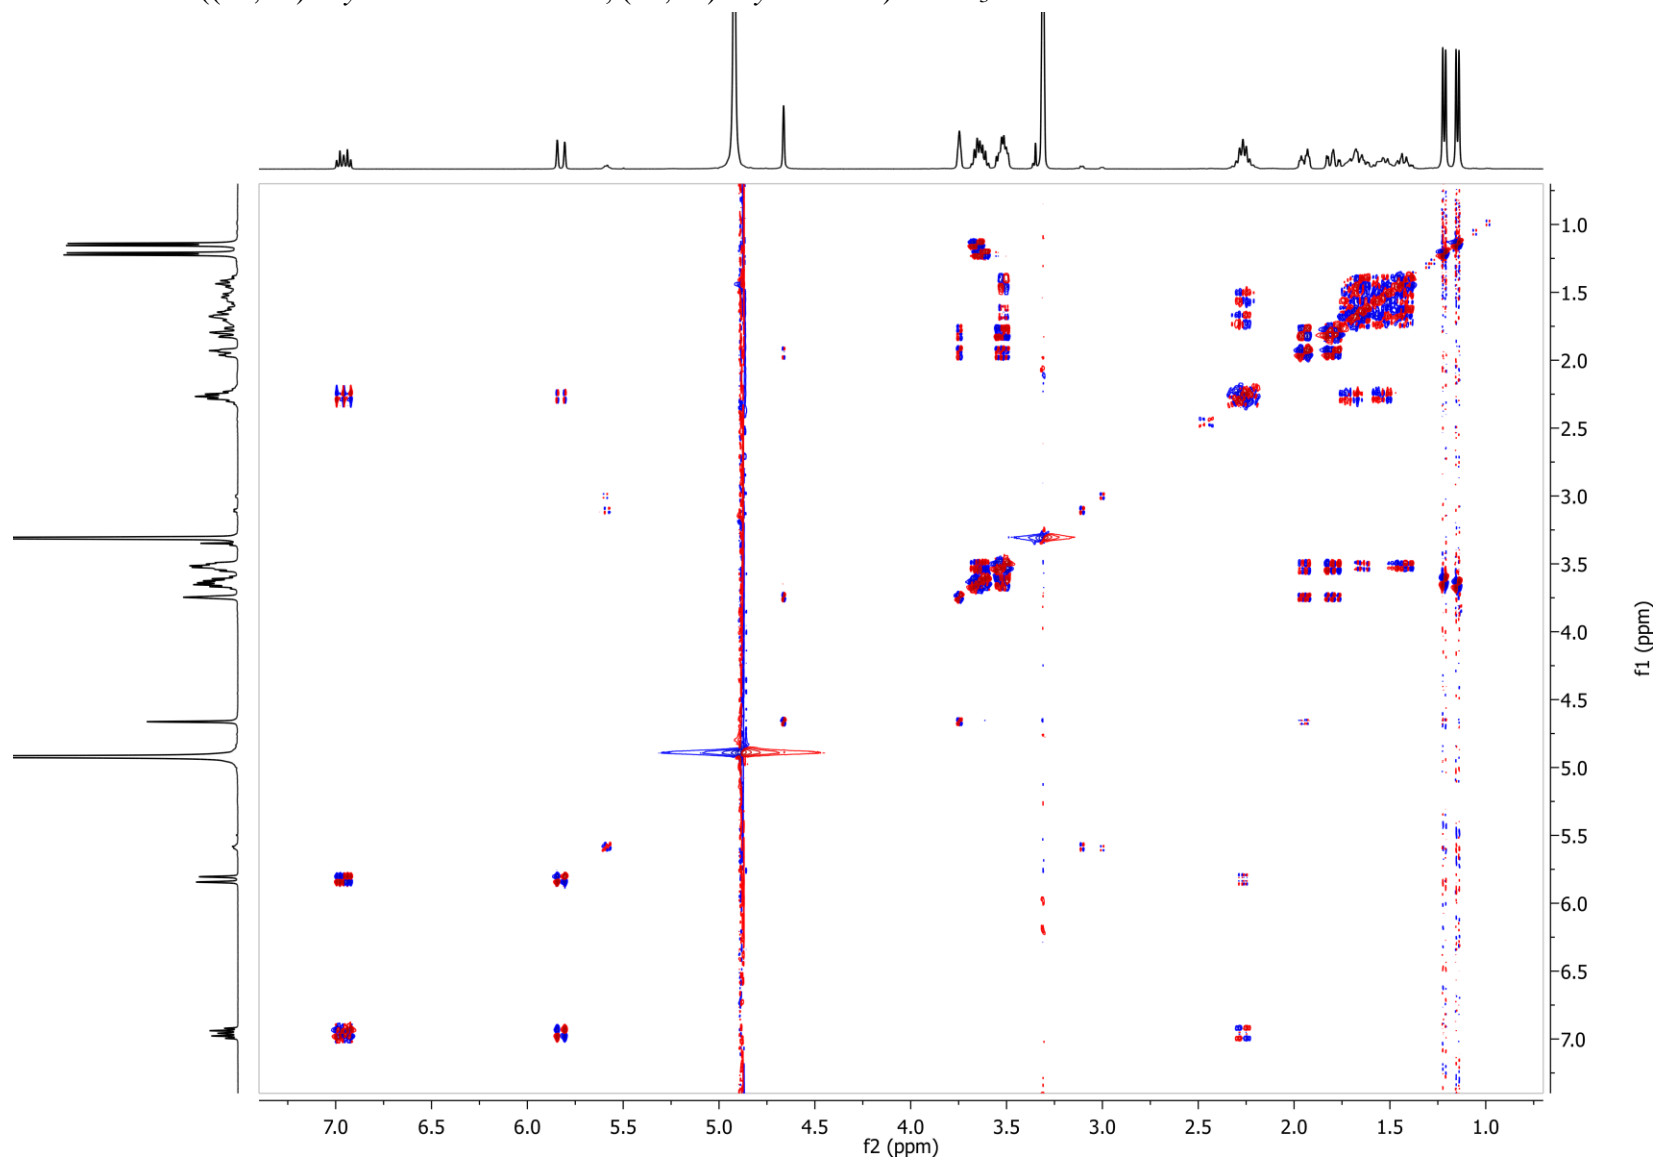

**Figure S59:**  $^1\text{H}$  NMR spectrum of synthetic 2-((6*S*)-6-((*R*)-1-[(3,6-dideoxy- $\alpha$ -L-*arabino*-hexopyranosyl)oxy]ethyl)tetrahydro-2H-pyran-2-yl)acetic acid (**23b**) in  $\text{CD}_3\text{OD}$ .

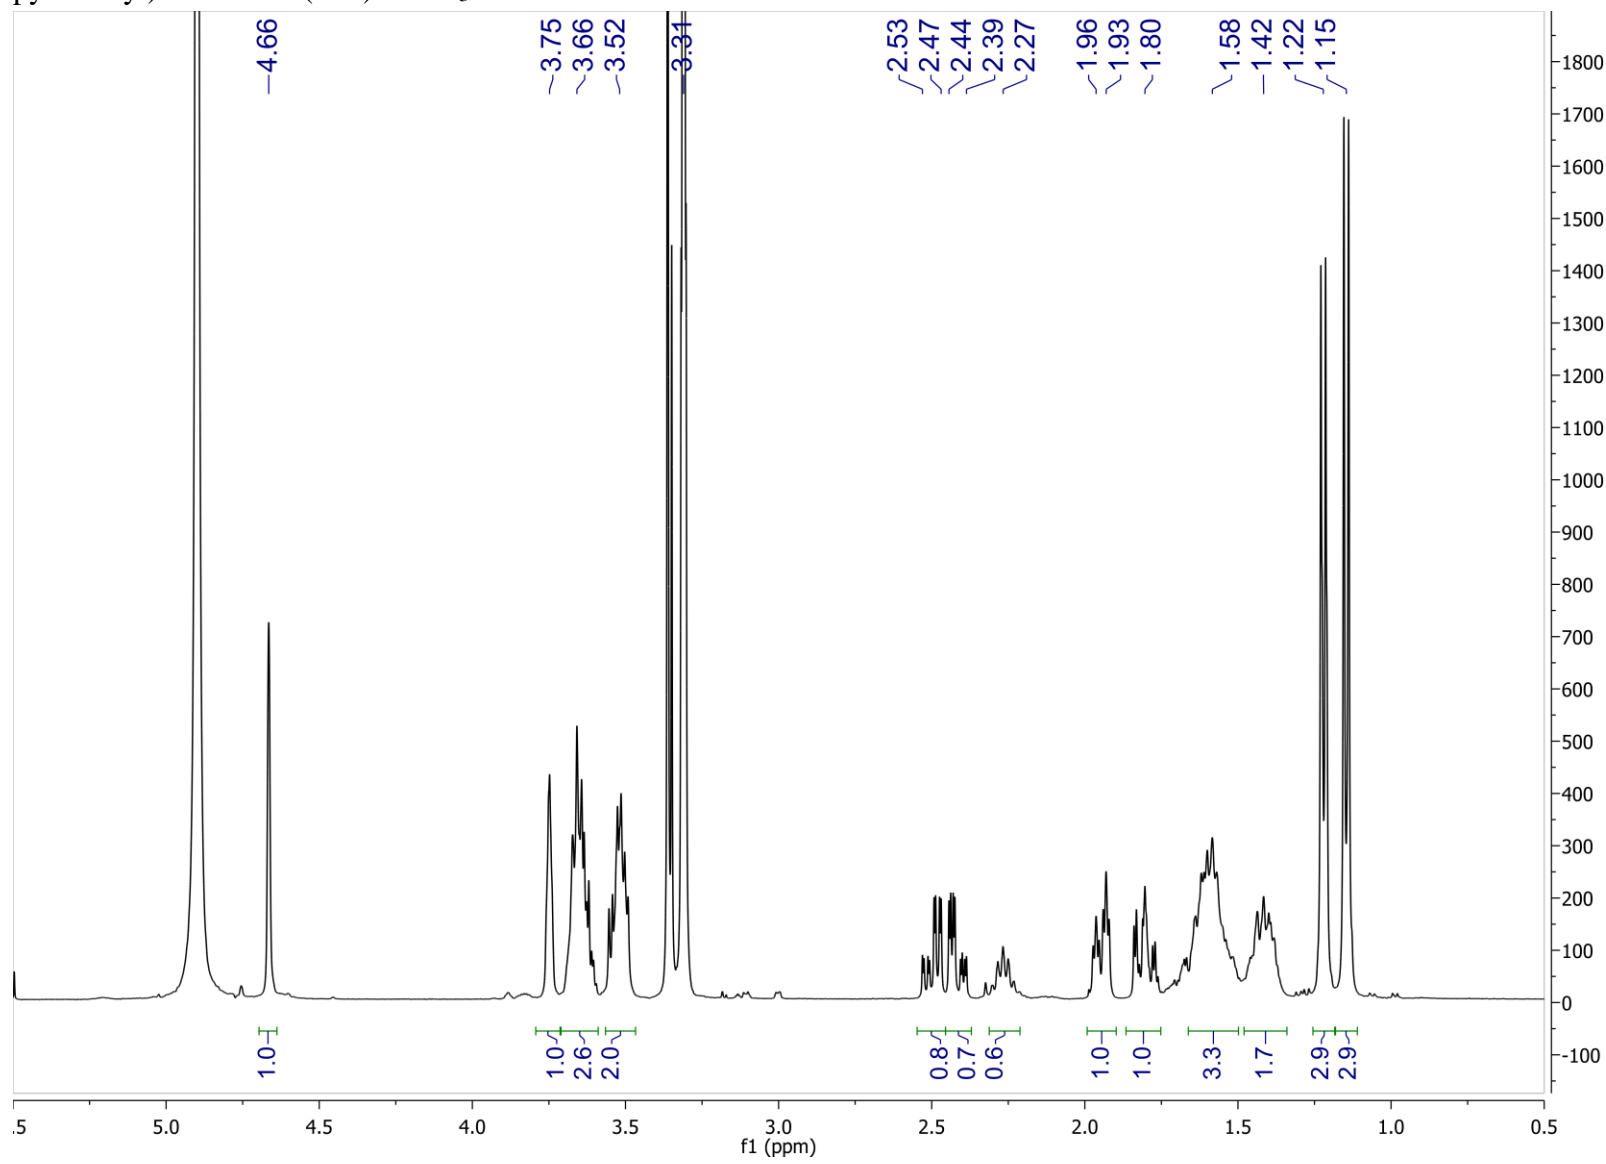



**Figure S60:**  $^{13}\text{C}$  NMR spectrum of synthetic 2-((6*S*)-6-((*R*)-1-[(3,6-dideoxy- $\alpha$ -L-*arabino*-hexopyranosyl)oxy]ethyl)tetrahydro-2H-pyran-2-yl)acetic acid (**23b**) in  $\text{CD}_3\text{OD}$ .

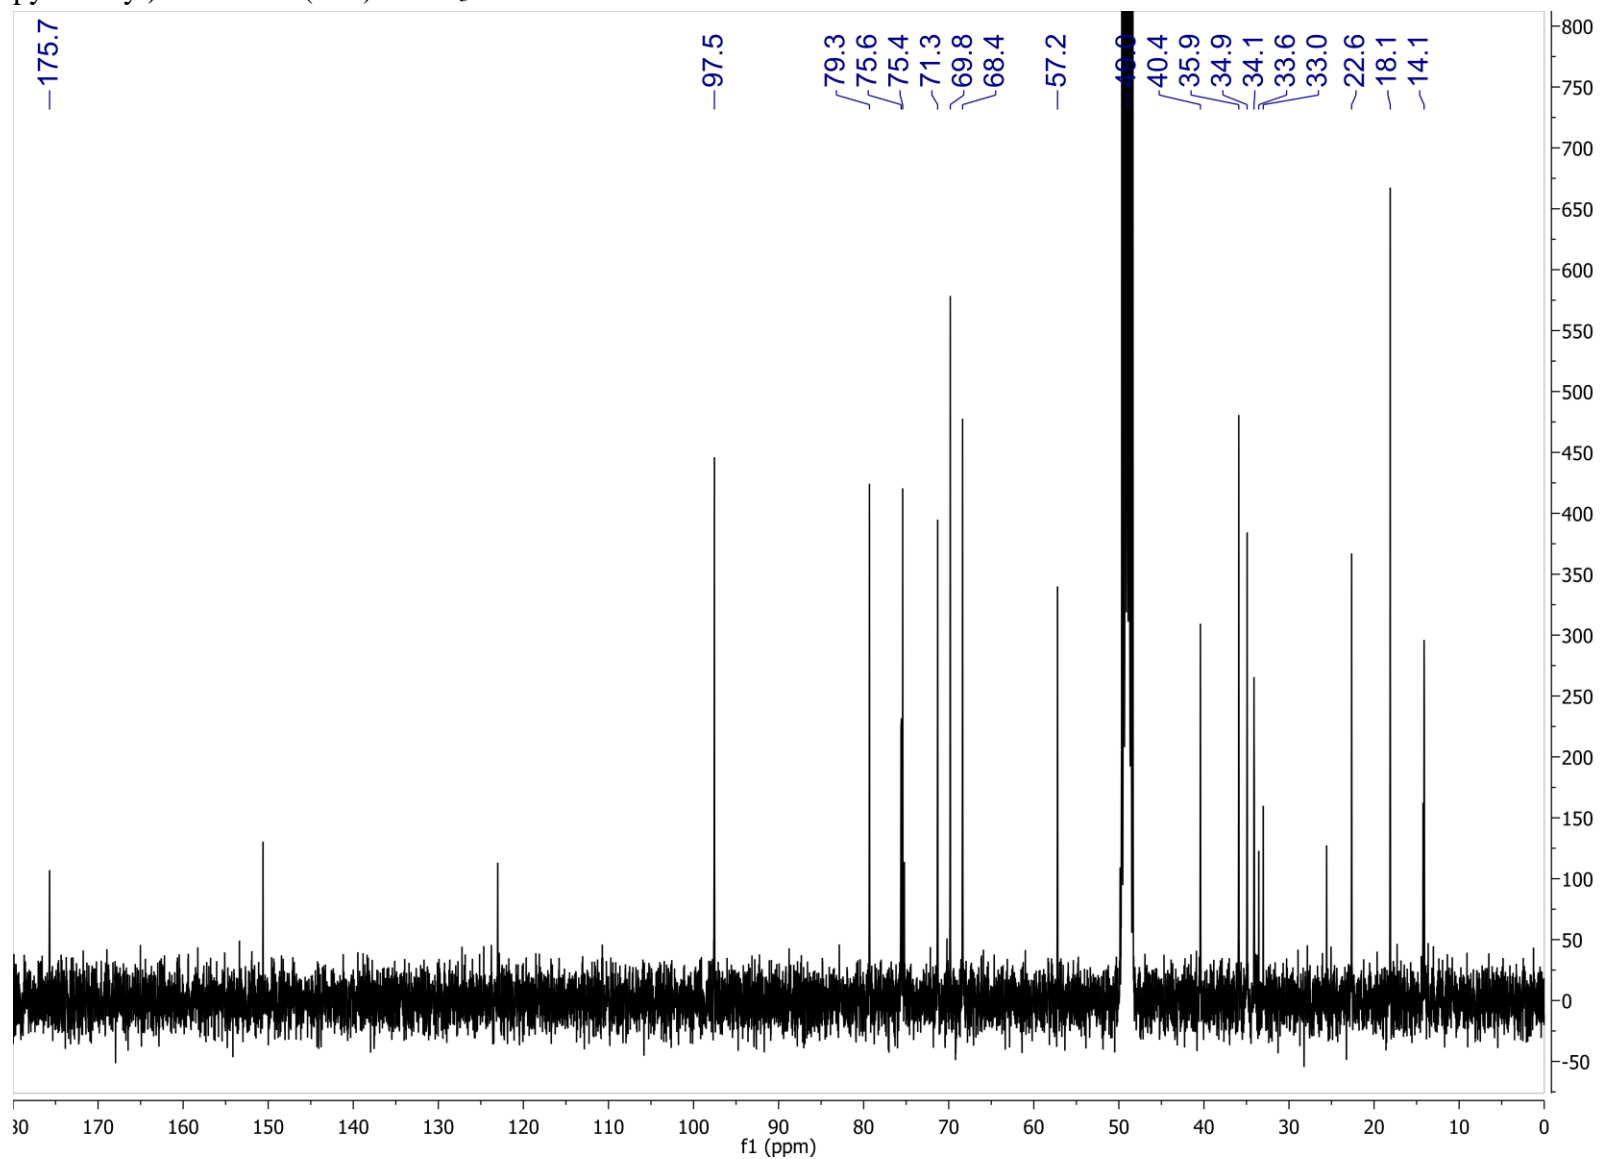

**Figure S61:** dqf-COSY spectrum of synthetic 2-((6*S*)-6-((*R*)-1-[(3,6-dideoxy- $\alpha$ -L-*arabino*-hexopyranosyl)oxy]ethyl)tetrahydro-2H-pyran-2-yl)acetic acid (**23b**) in CD<sub>3</sub>OD.

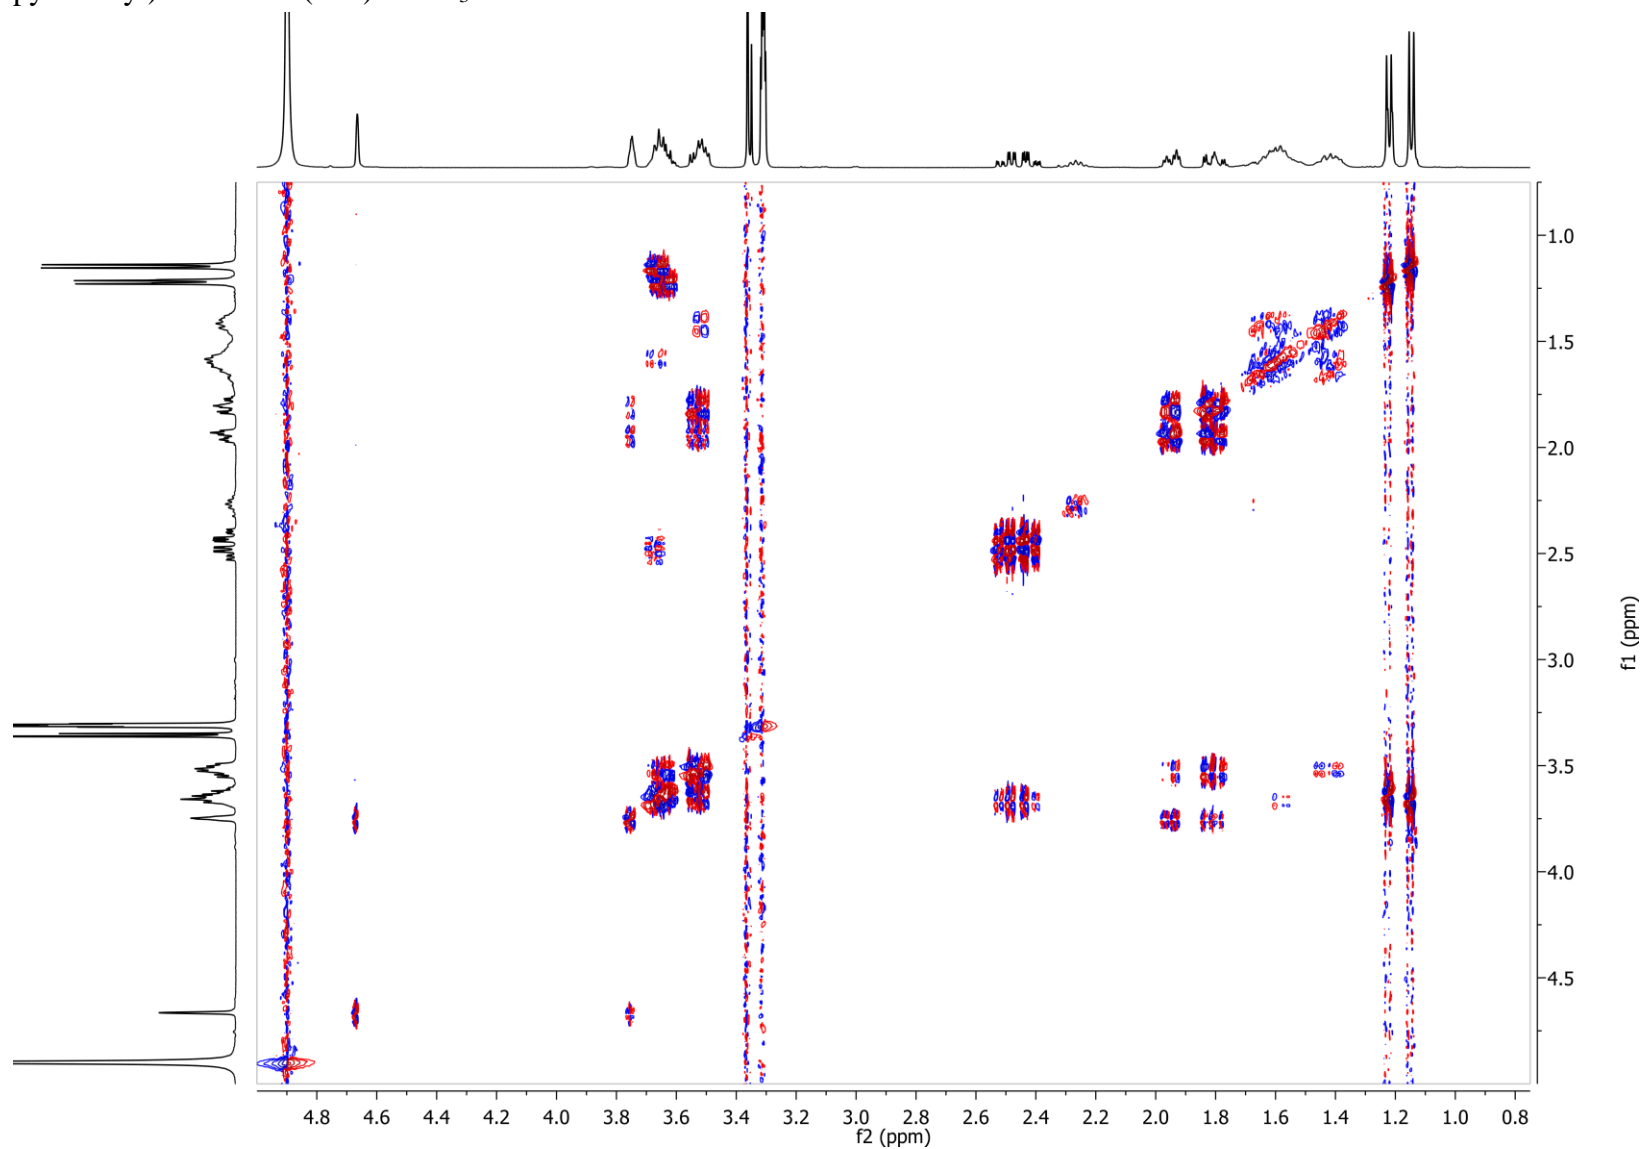

**Figure S62:** HMQC spectrum of synthetic 2-((6*S*)-6-((*R*)-1-[(3,6-dideoxy- $\alpha$ -L-*arabino*-hexopyranosyl)oxy]ethyl)tetrahydro-2H-pyran-2-yl)acetic acid (**23b**) in CD<sub>3</sub>OD.

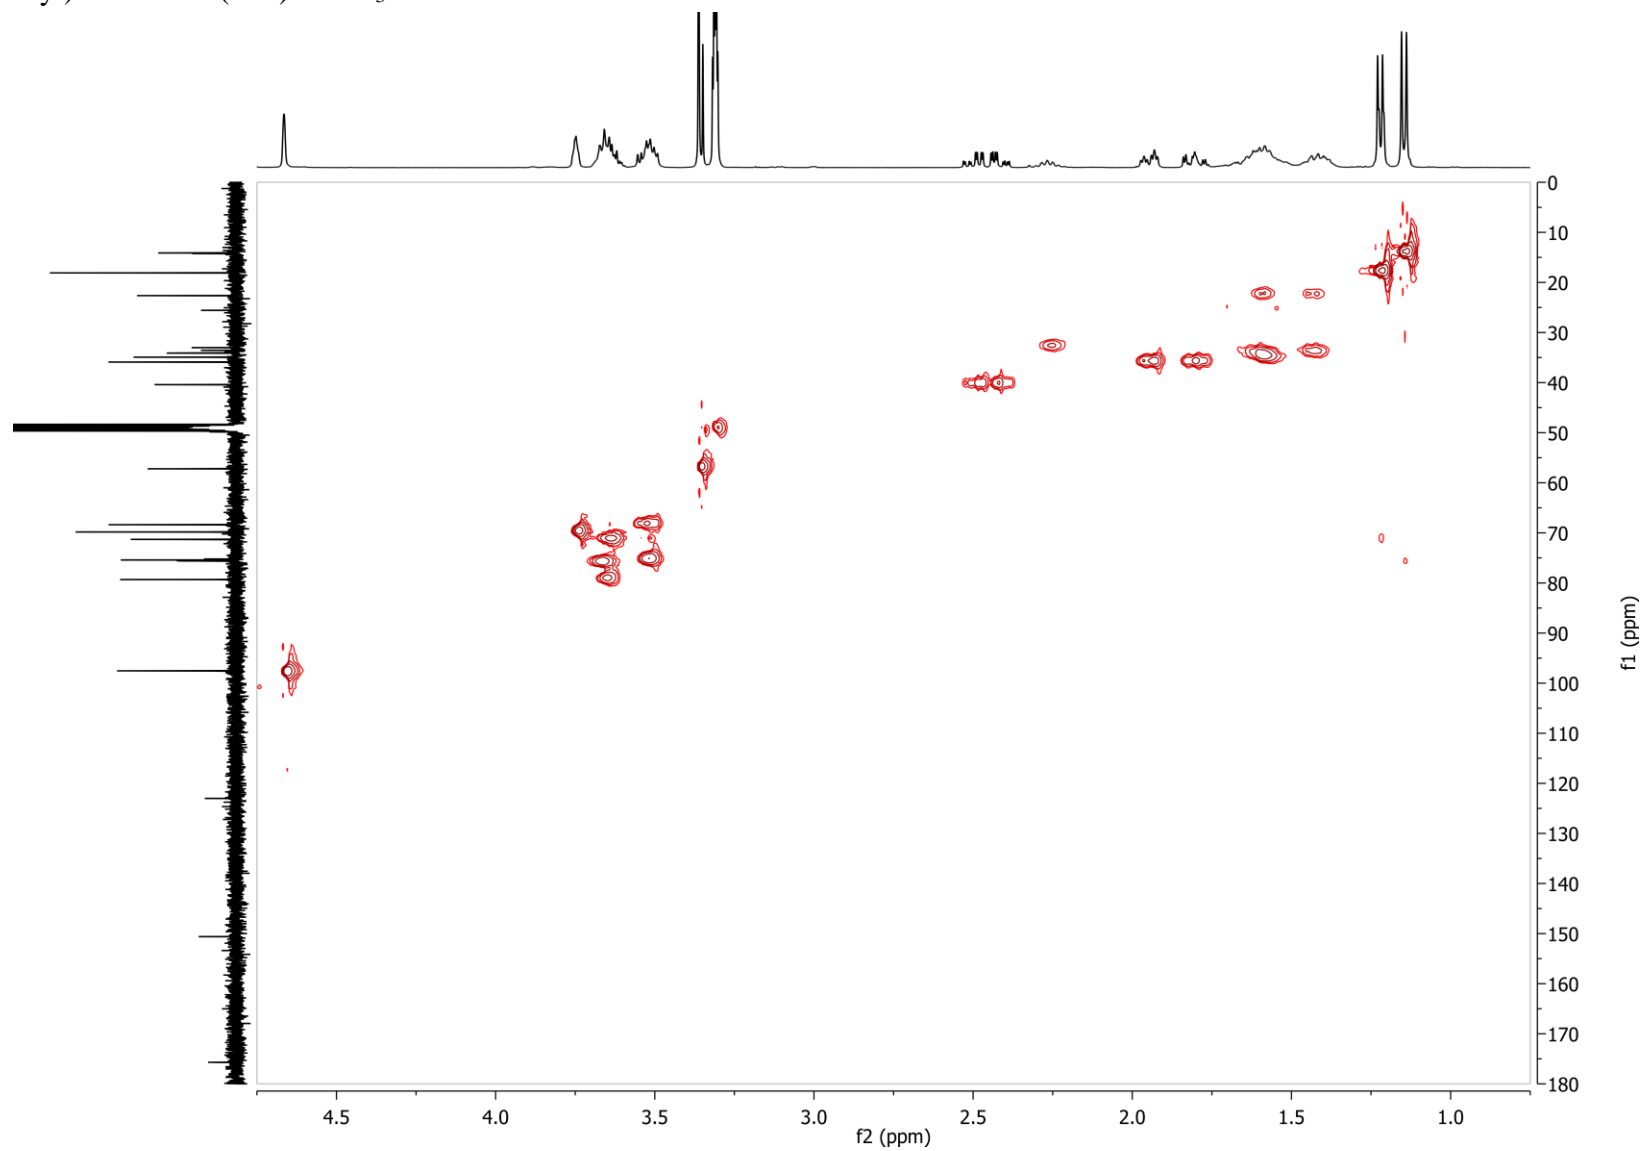

**Figure S63:**  $^1\text{H}$  NMR spectrum of synthetic (7*S*)-7-*tert*-Butyldimethylsilyloxy-6-hydroxy-1-octene (**25**) in  $\text{CDCl}_3$ .

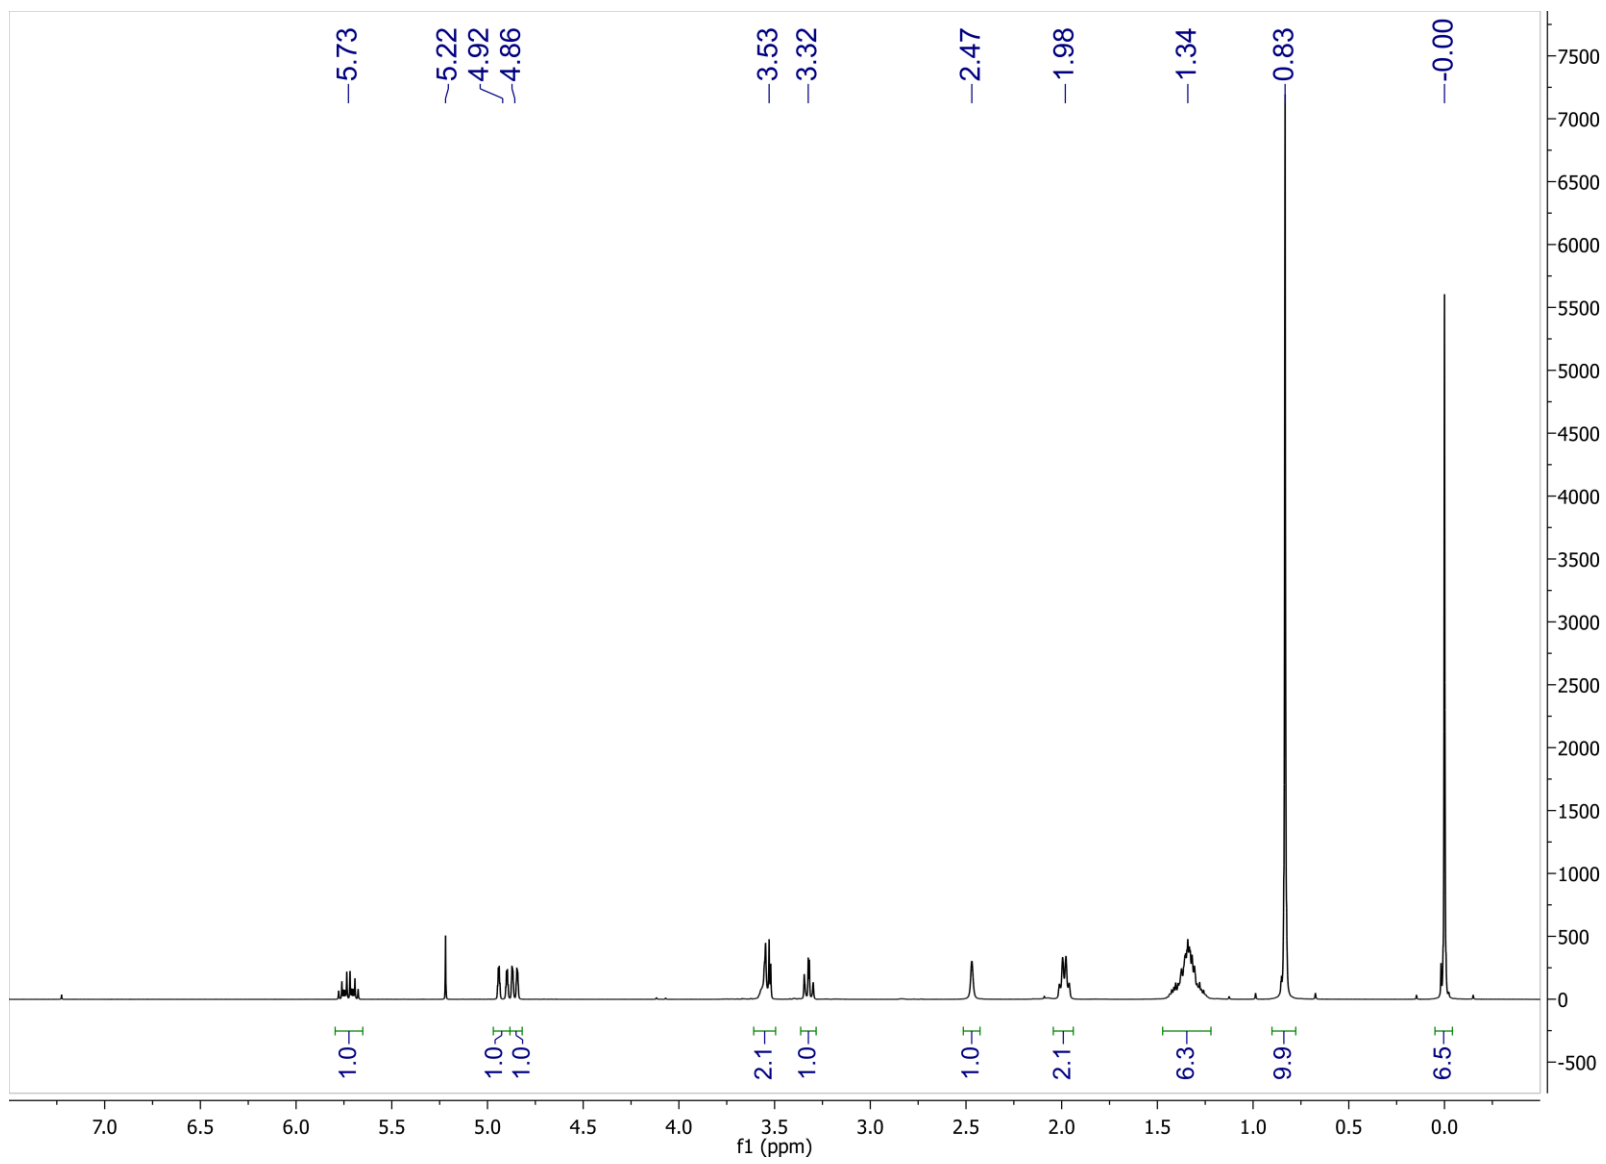

**Figure S64:**  $^{13}\text{C}$  NMR spectrum of synthetic (7*S*)-7-*tert*-Butyldimethylsilyloxy-6-hydroxy-1-octene (**25**) in  $\text{CDCl}_3$ .

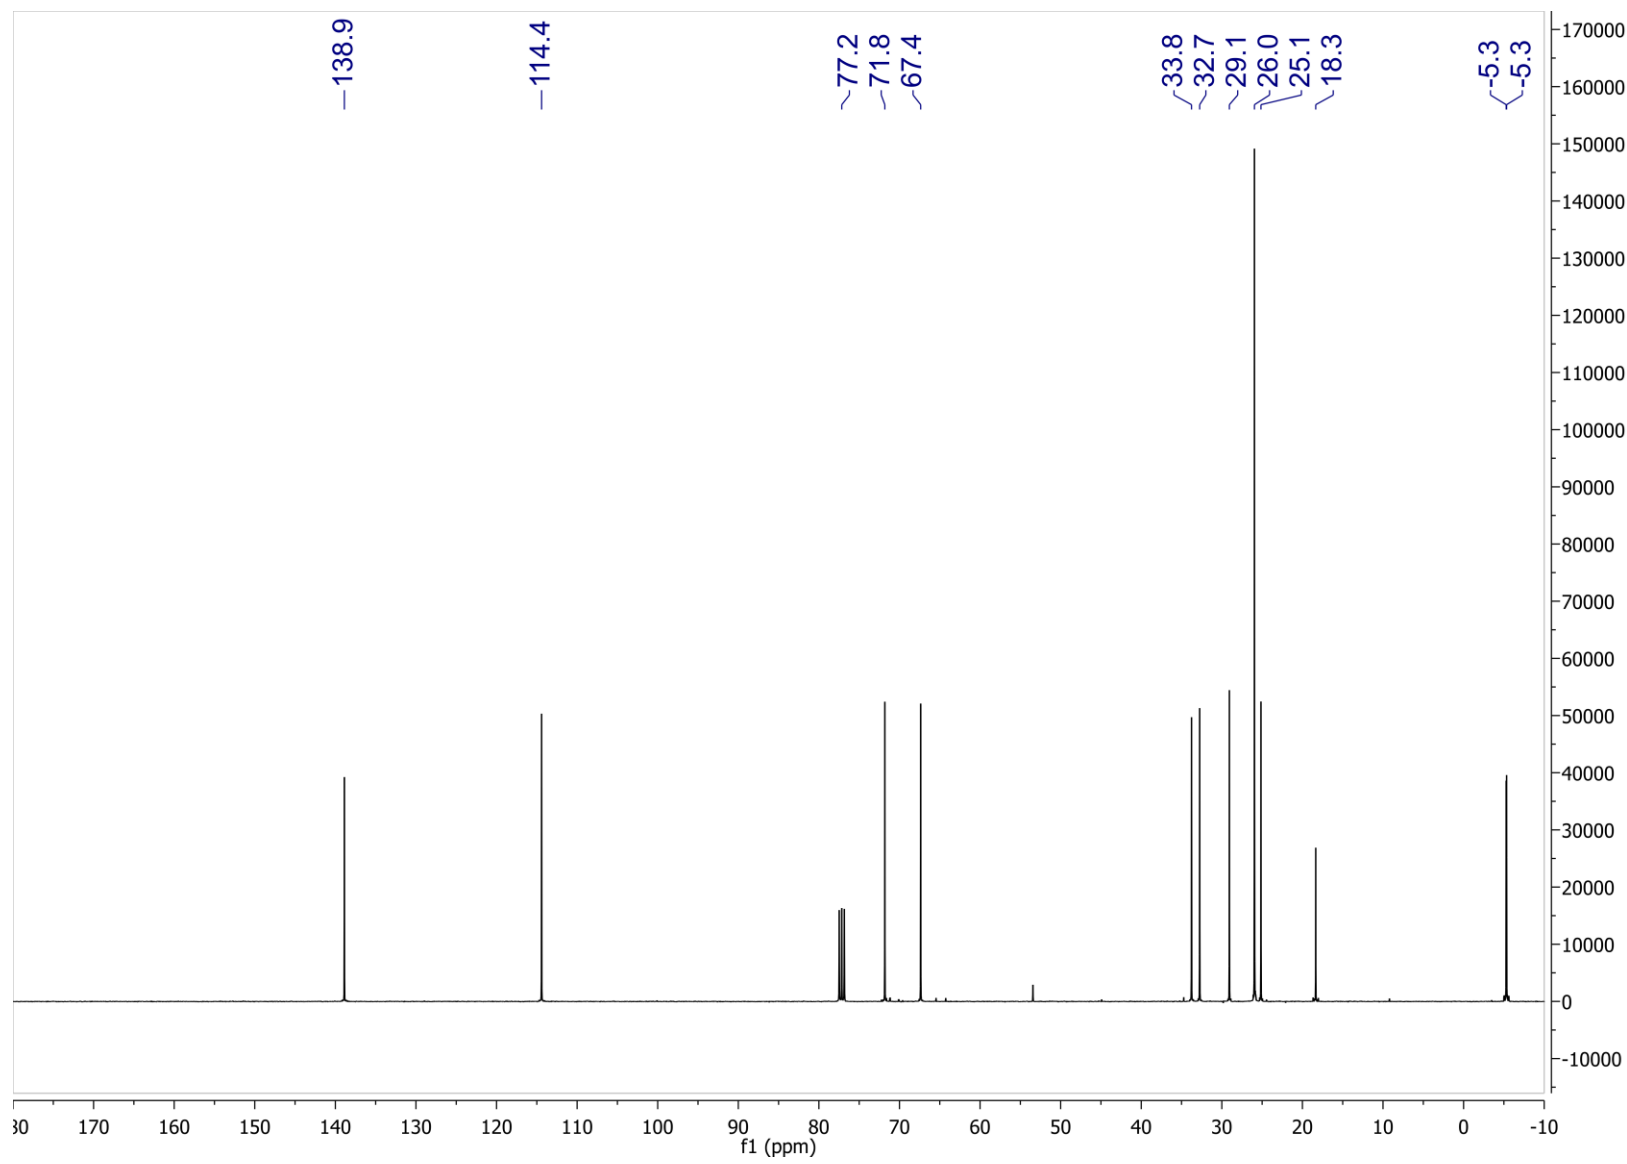

**Figure S65:**  $^1\text{H}$  NMR spectrum of synthetic (2*E*,8*S*)-Ethyl 9-*tert*-butyldimethylsilyloxy-8-hydroxy-2-nonenoate (**26**) in  $\text{CDCl}_3$ .

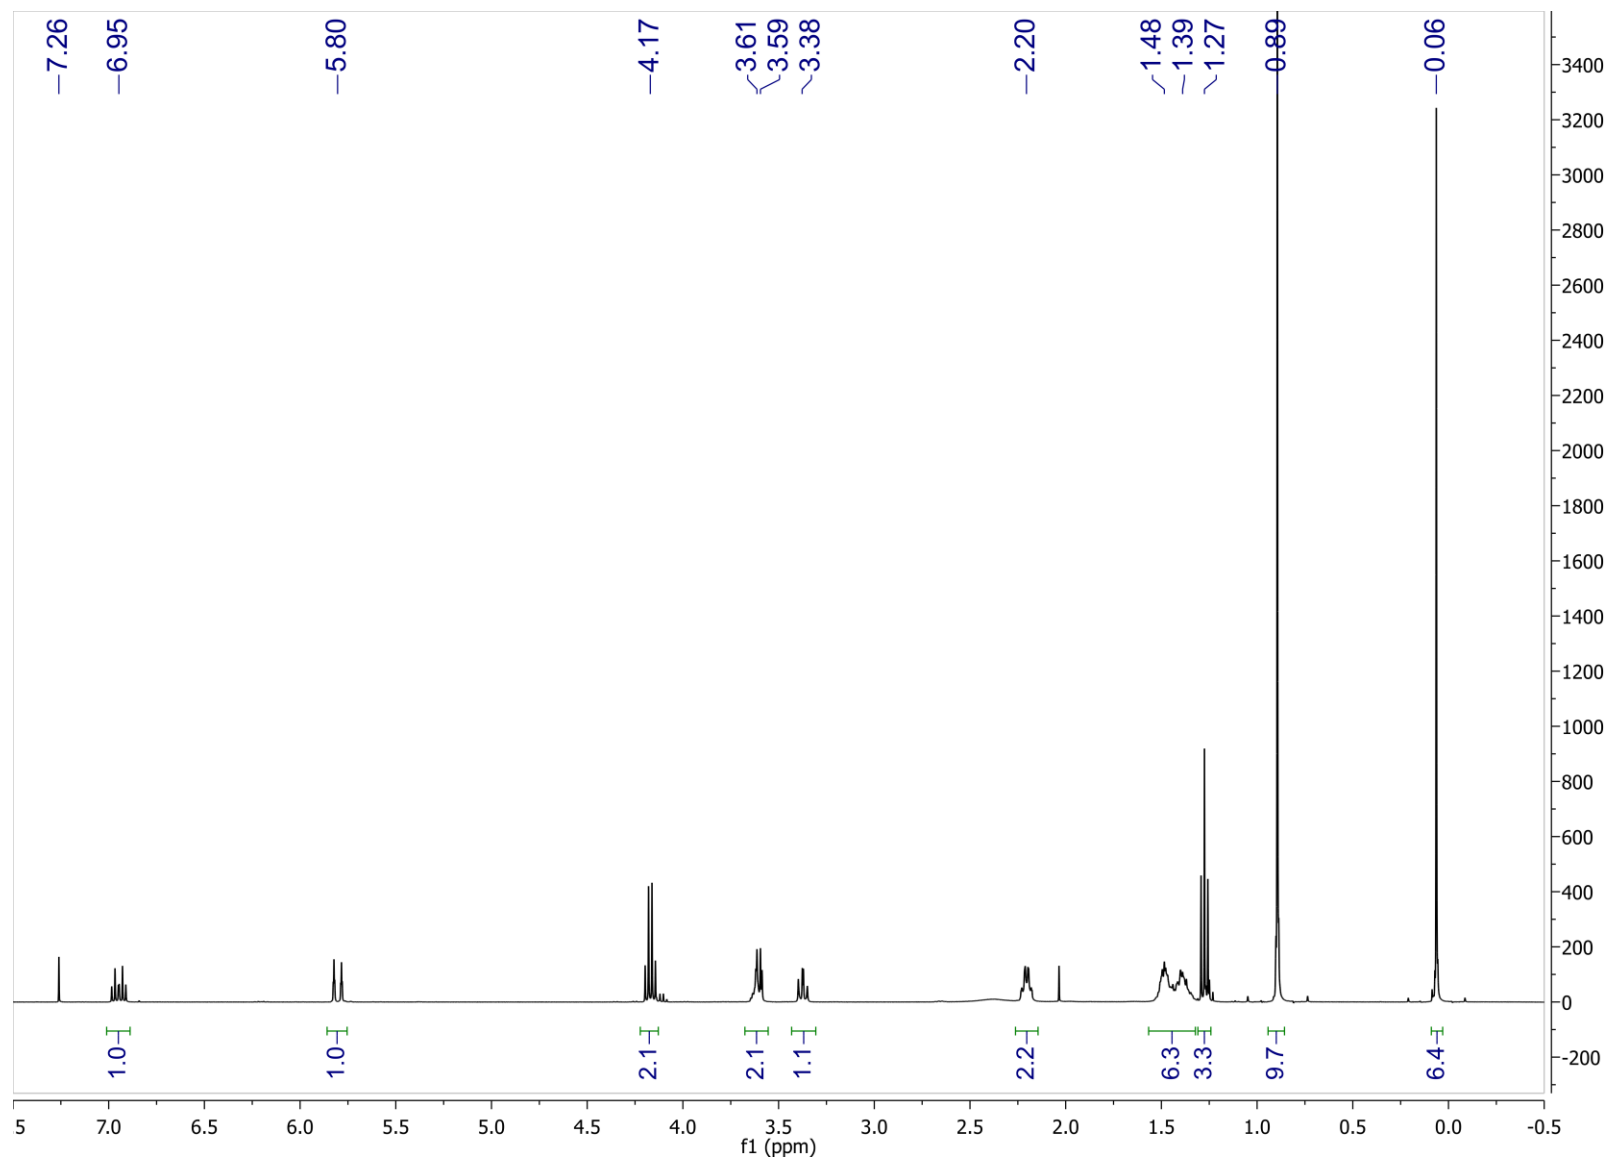

**Figure S66:**  $^{13}\text{C}$  NMR spectrum of synthetic (2*E*,8*S*)-Ethyl 9-*tert*-butyldimethylsilyloxy-8-hydroxy-2-nonenoate (**26**) in  $\text{CDCl}_3$ .

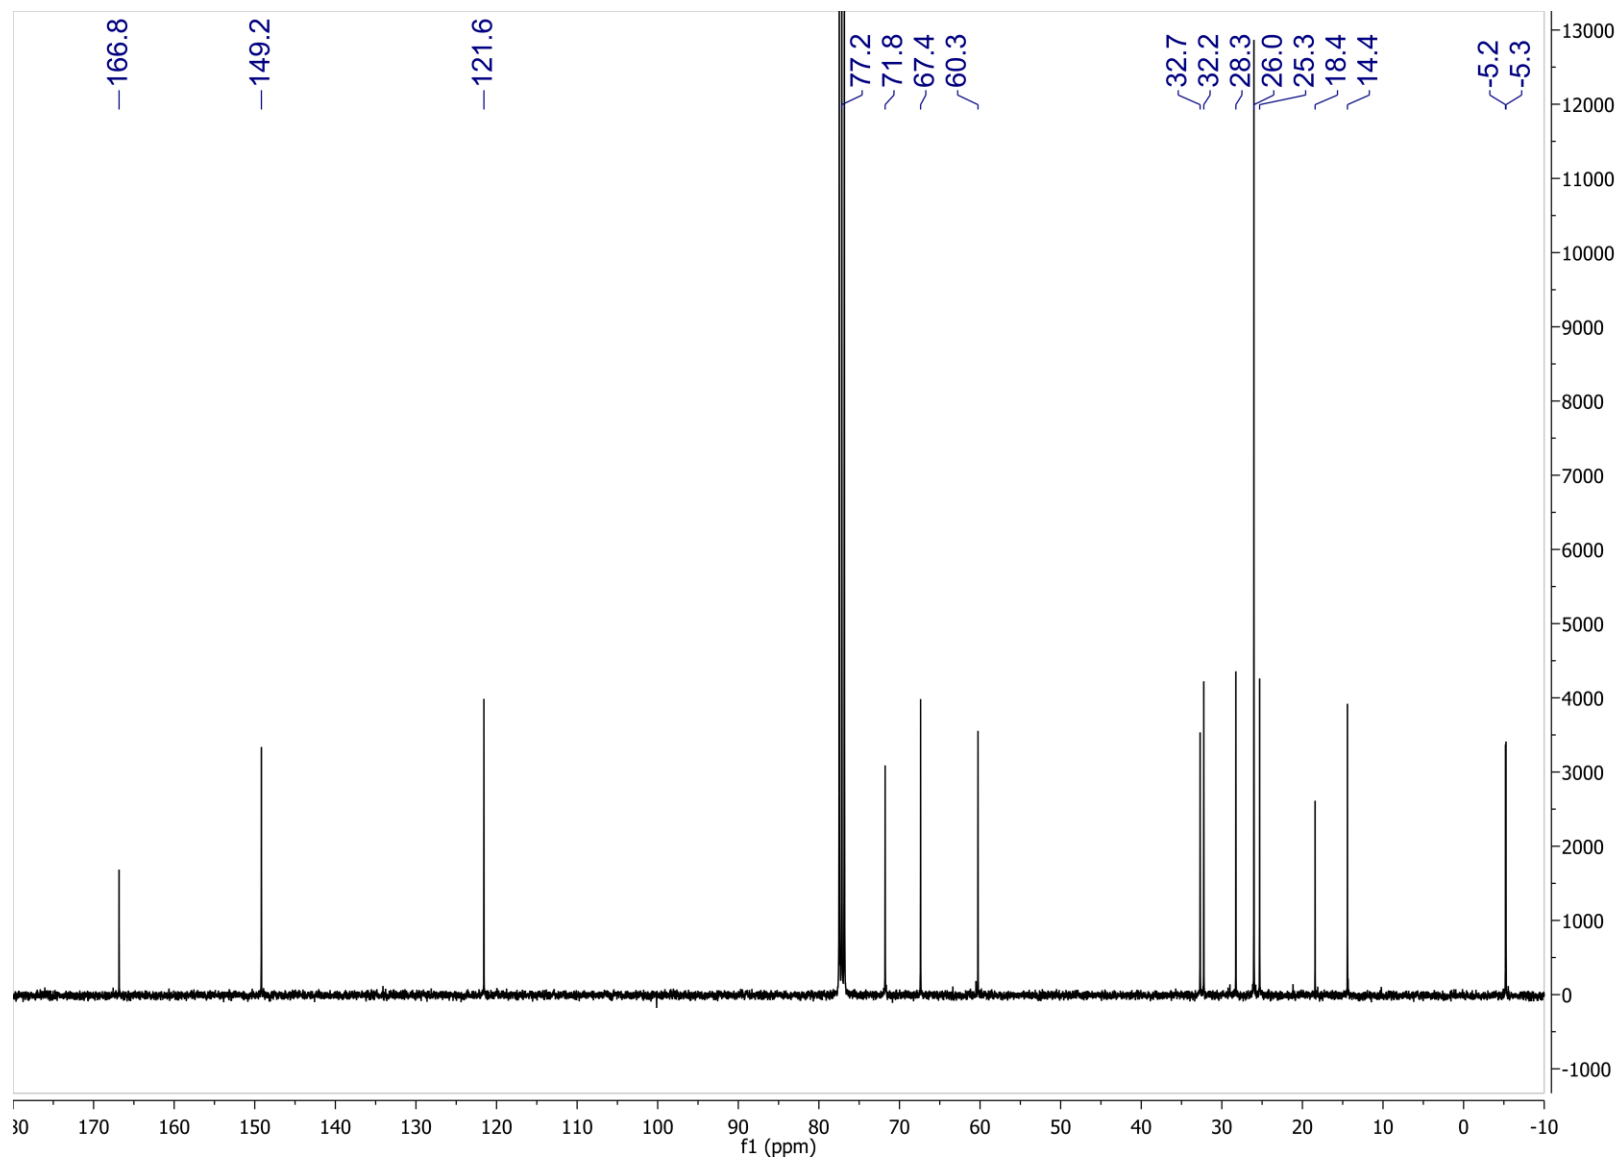

**Figure S67:** HMQC spectrum of synthetic (2*E*,8*S*)-Ethyl 9-*tert*-butyldimethylsilyloxy-8-hydroxy-2-nonenoate (**26**) in CDCl<sub>3</sub>.

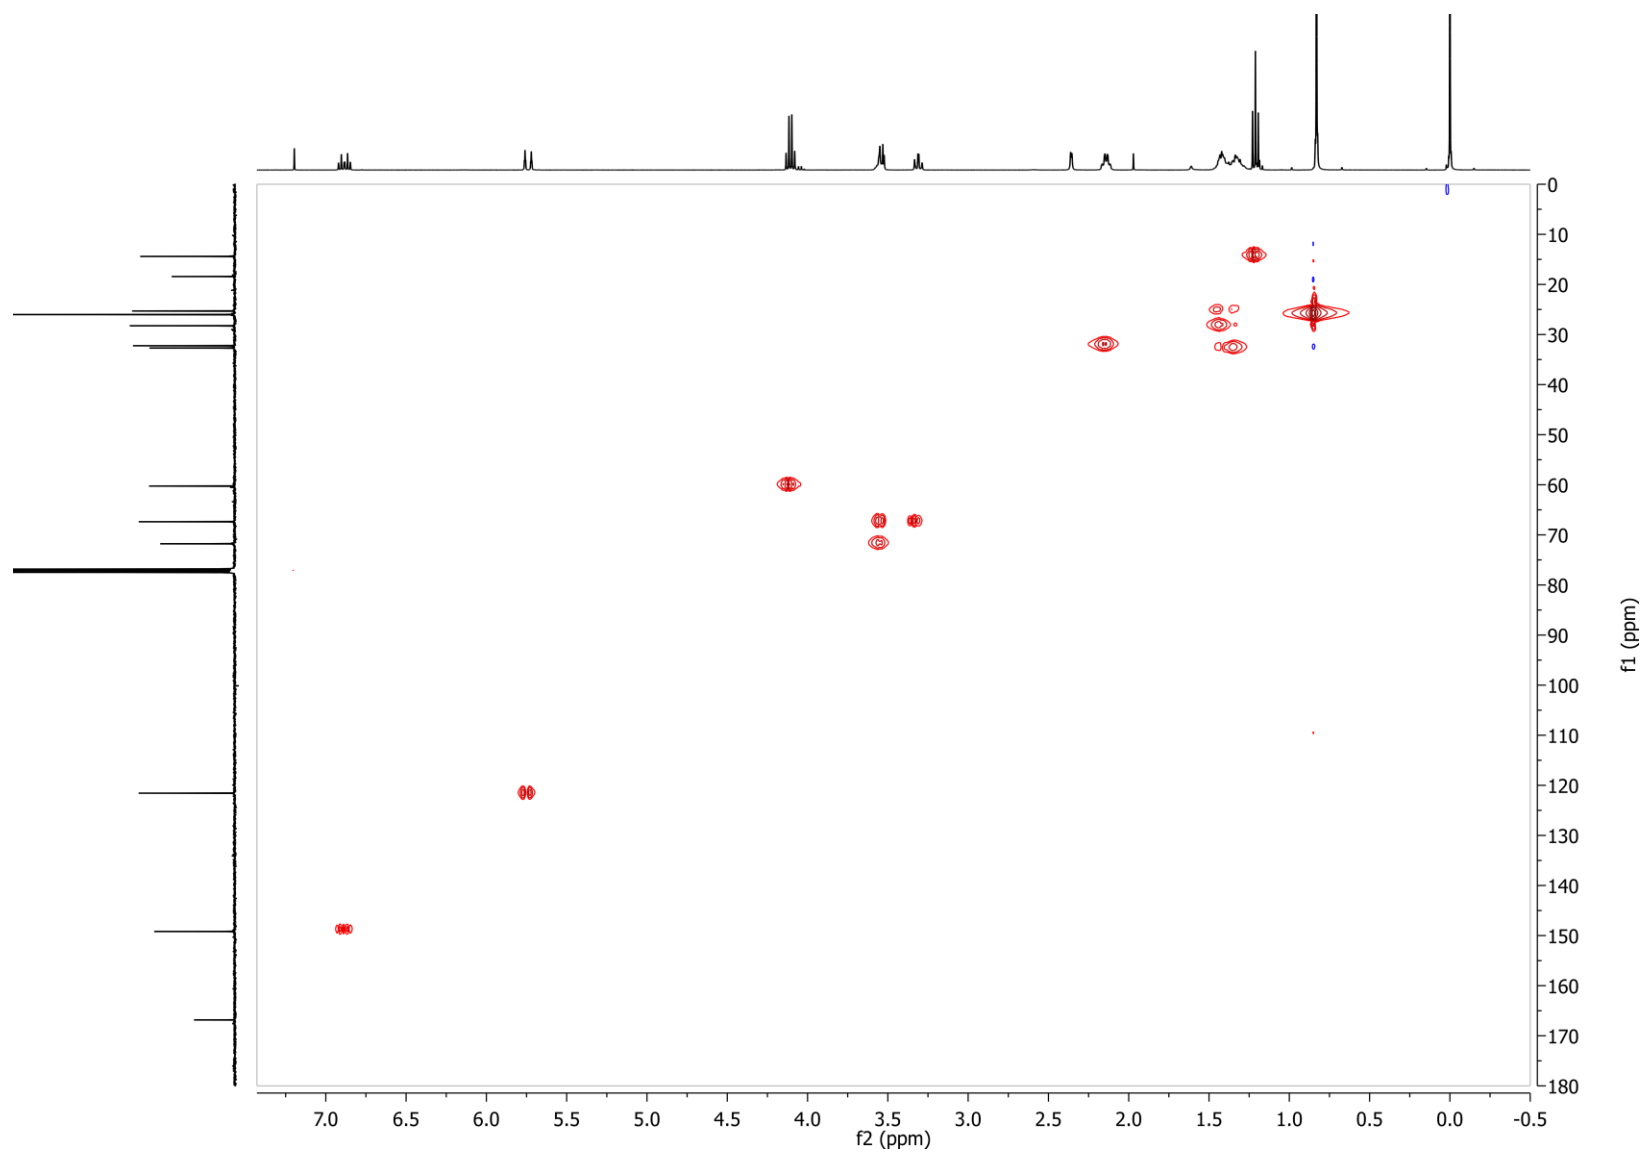



**Figure S68:**  $^1\text{H}$  NMR spectrum of synthetic (2*E*,8*S*)-Ethyl 8-[(2,4-di-*O*-benzoyl-3,6-dideoxy- $\alpha$ -L-*arabino*-hexopyranosyl)oxy]-9-*tert*-butyldimethylsilyloxy-2-nonenoate (**27**) in  $\text{CDCl}_3$ .

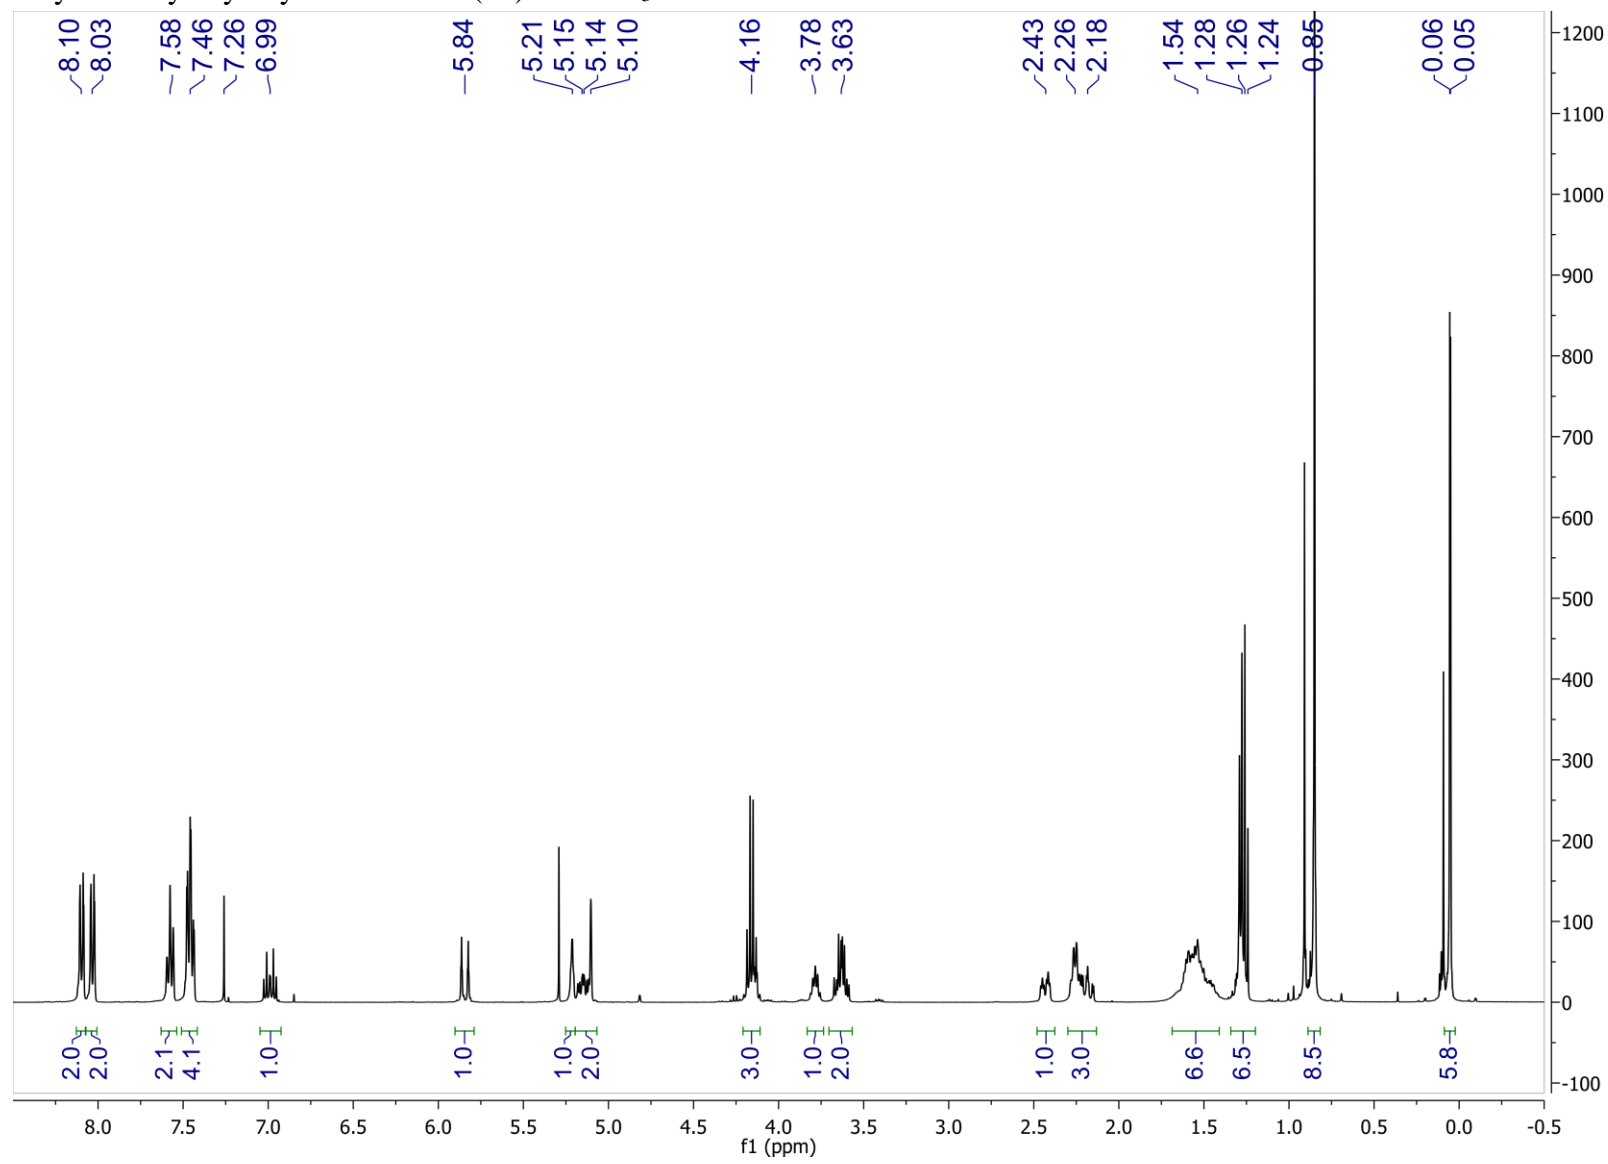

**Figure S69:**  $^{13}\text{C}$  NMR spectrum of synthetic (2*E*,8*S*)-Ethyl 8-[(2,4-di-*O*-benzoyl-3,6-dideoxy- $\alpha$ -L-*arabino*-hexopyranosyl)oxy]-9-*tert*-butyldimethylsilyloxy-2-nonenoate (**27**) in  $\text{CDCl}_3$ .

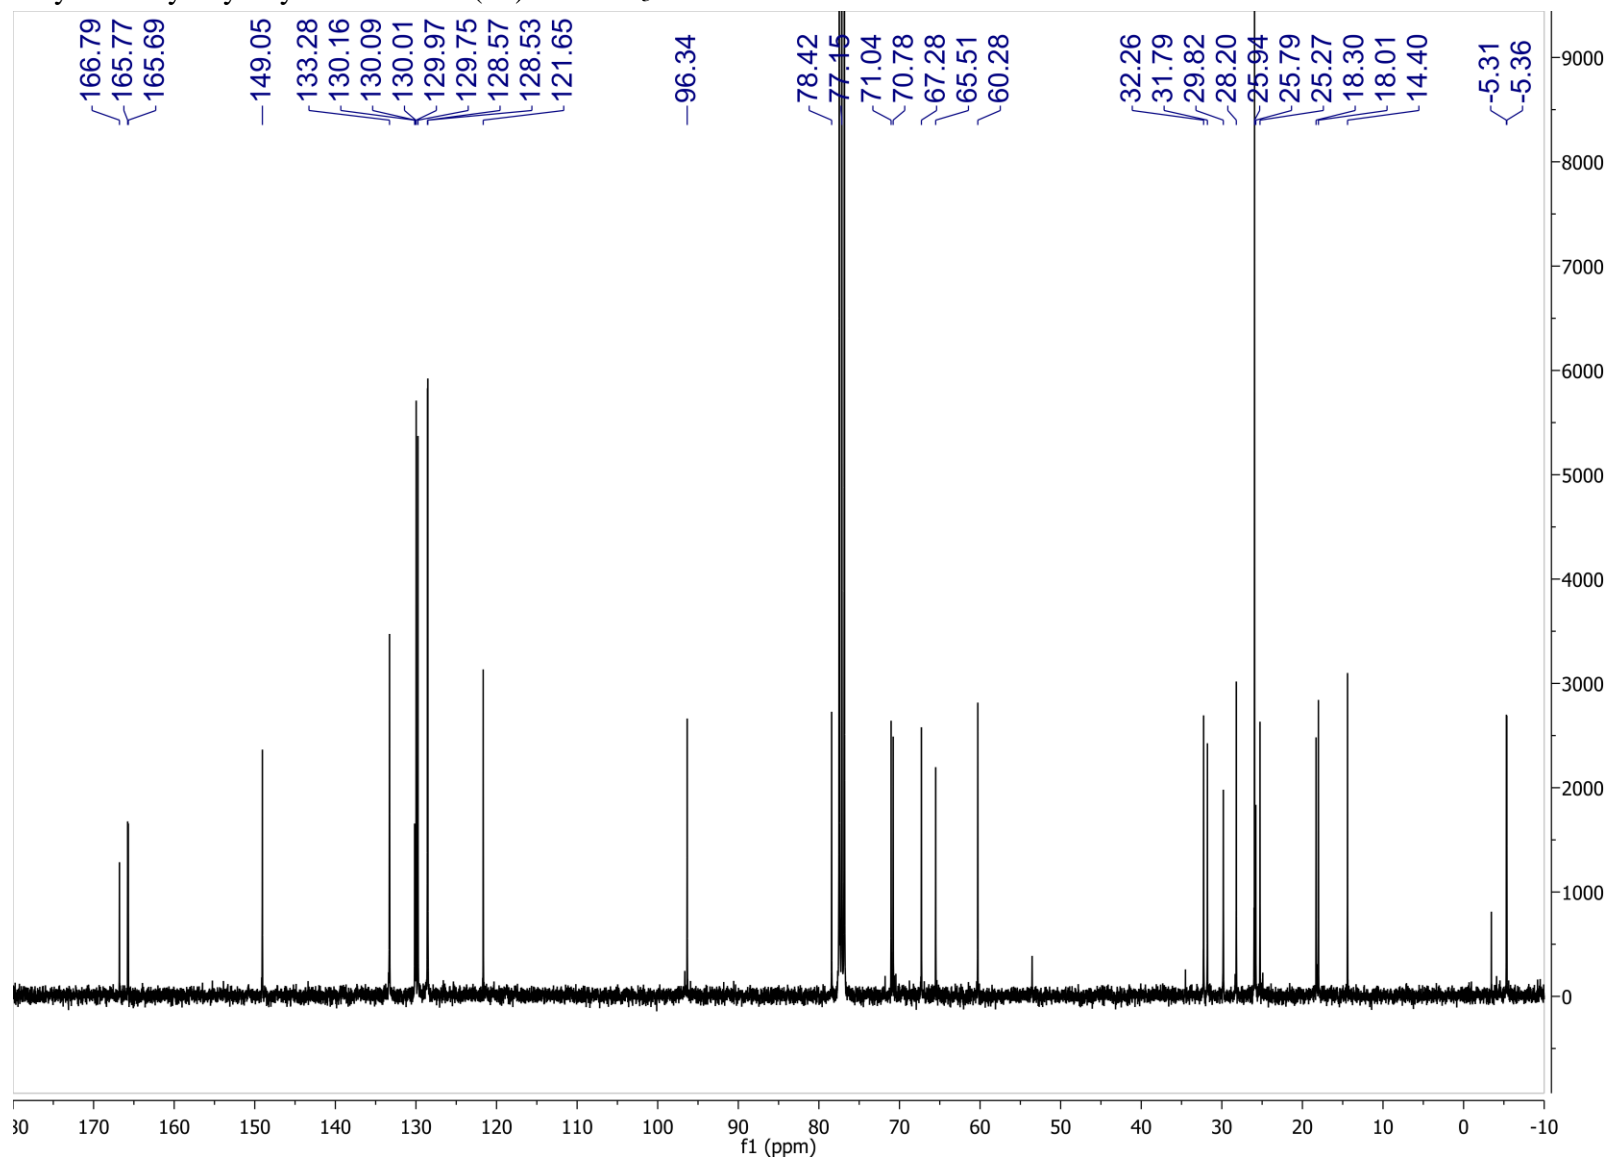

**Figure S70:** dqf-COSY spectrum of synthetic (2*E*,8*S*)-Ethyl 8-[(2,4-di-*O*-benzoyl-3,6-dideoxy- $\alpha$ -L-arabino-hexopyranosyl)oxy]-9-*tert*-butyldimethylsilyloxy-2-nonenoate (**27**) in CDCl<sub>3</sub>.

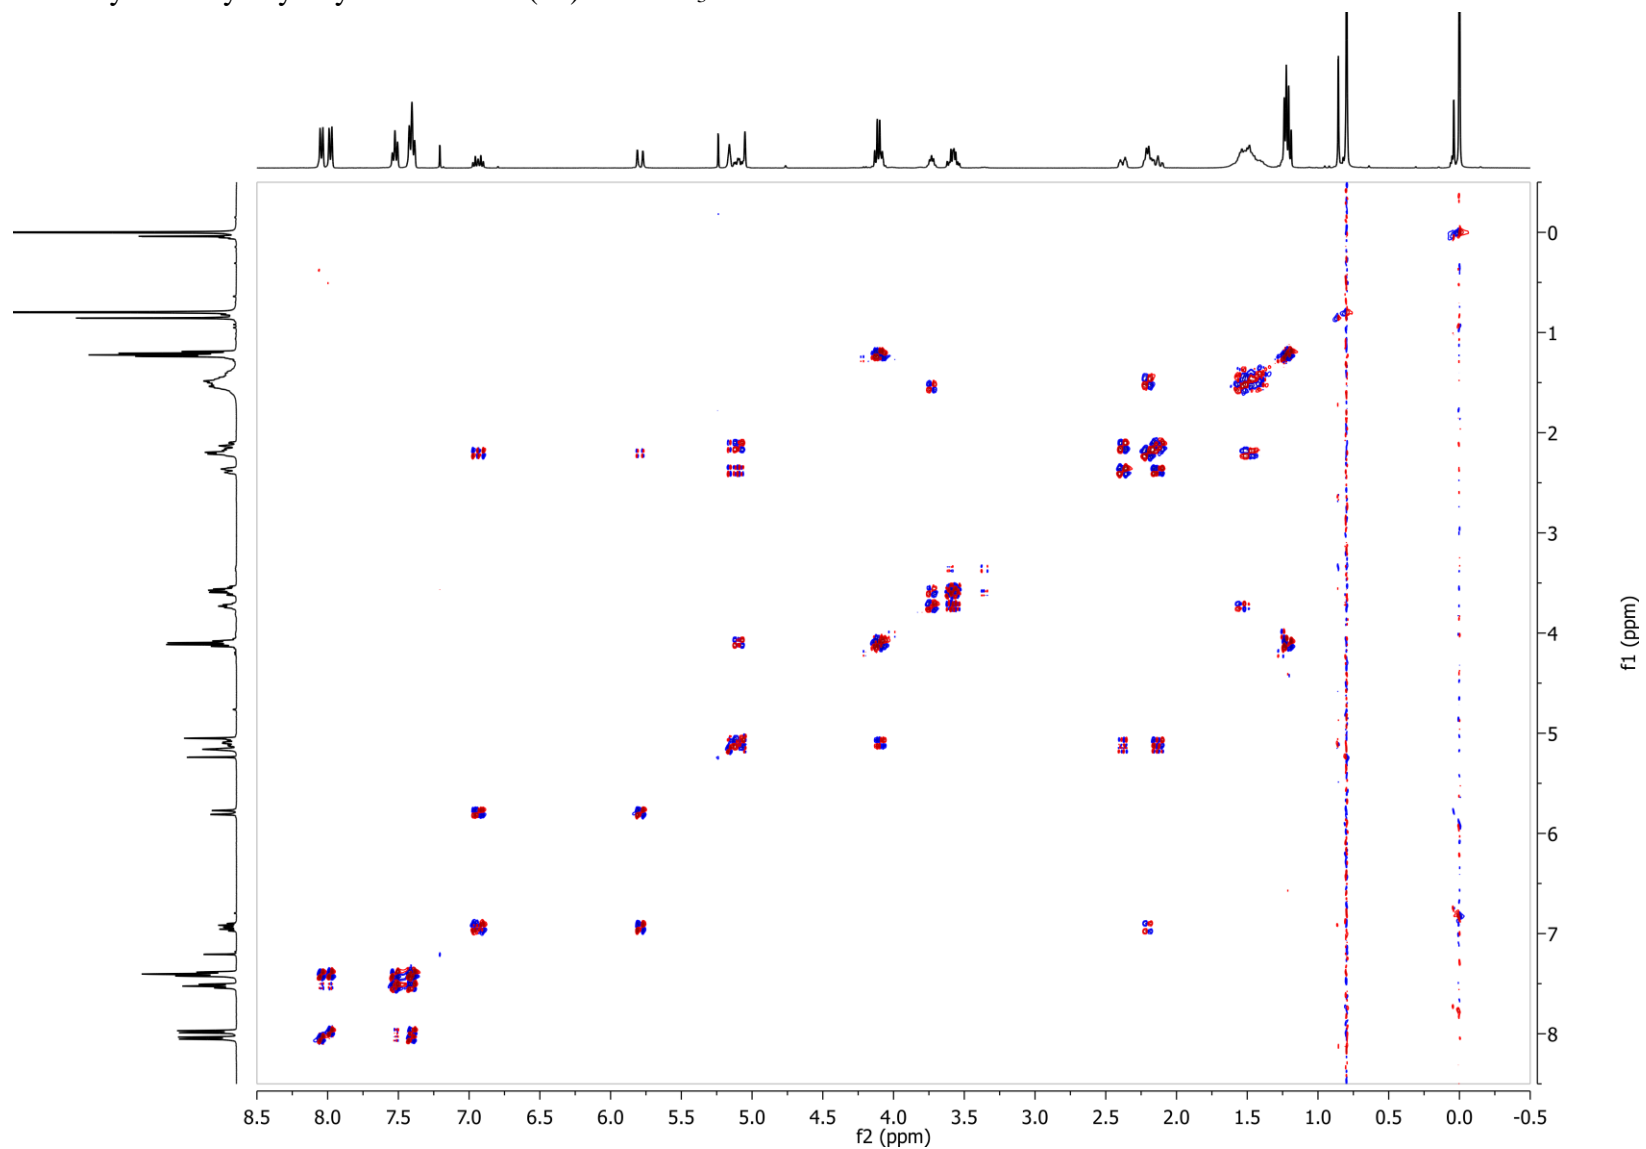

**Figure S71:** HMQC spectrum of synthetic (2*E*,8*S*)-Ethyl 8-[(2,4-di-*O*-benzoyl-3,6-dideoxy- $\alpha$ -L-*arabino*-hexopyranosyl)oxy]-9-*tert*-butyldimethylsilyloxy-2-nonenoate (**27**) in CDCl<sub>3</sub>.

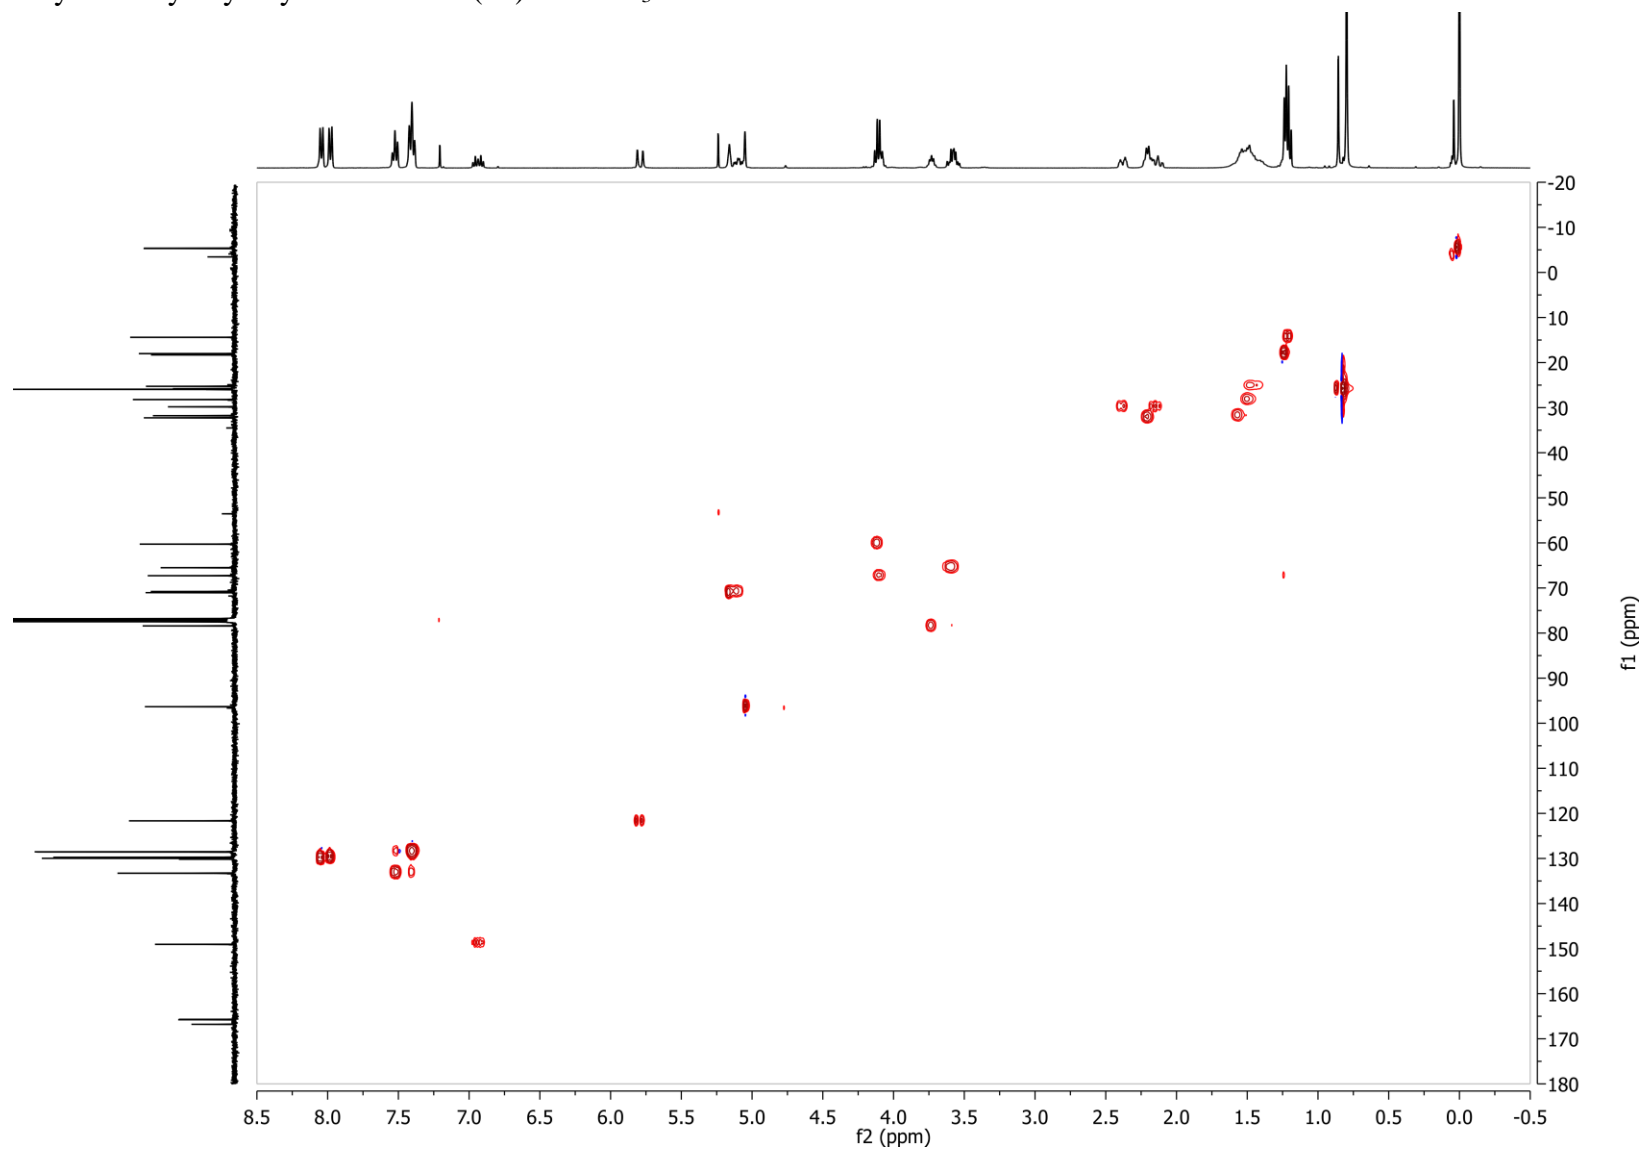

**Figure S72:**  $^1\text{H}$  NMR spectrum of synthetic (2*E*,8*S*)-Ethyl 8-[(2,4-di-*O*-benzoyl-3,6-dideoxy- $\alpha$ -L-*arabino*-hexopyranosyl)oxy]-9-hydroxy-2-nonenoate (**28**) in  $\text{CDCl}_3$ .

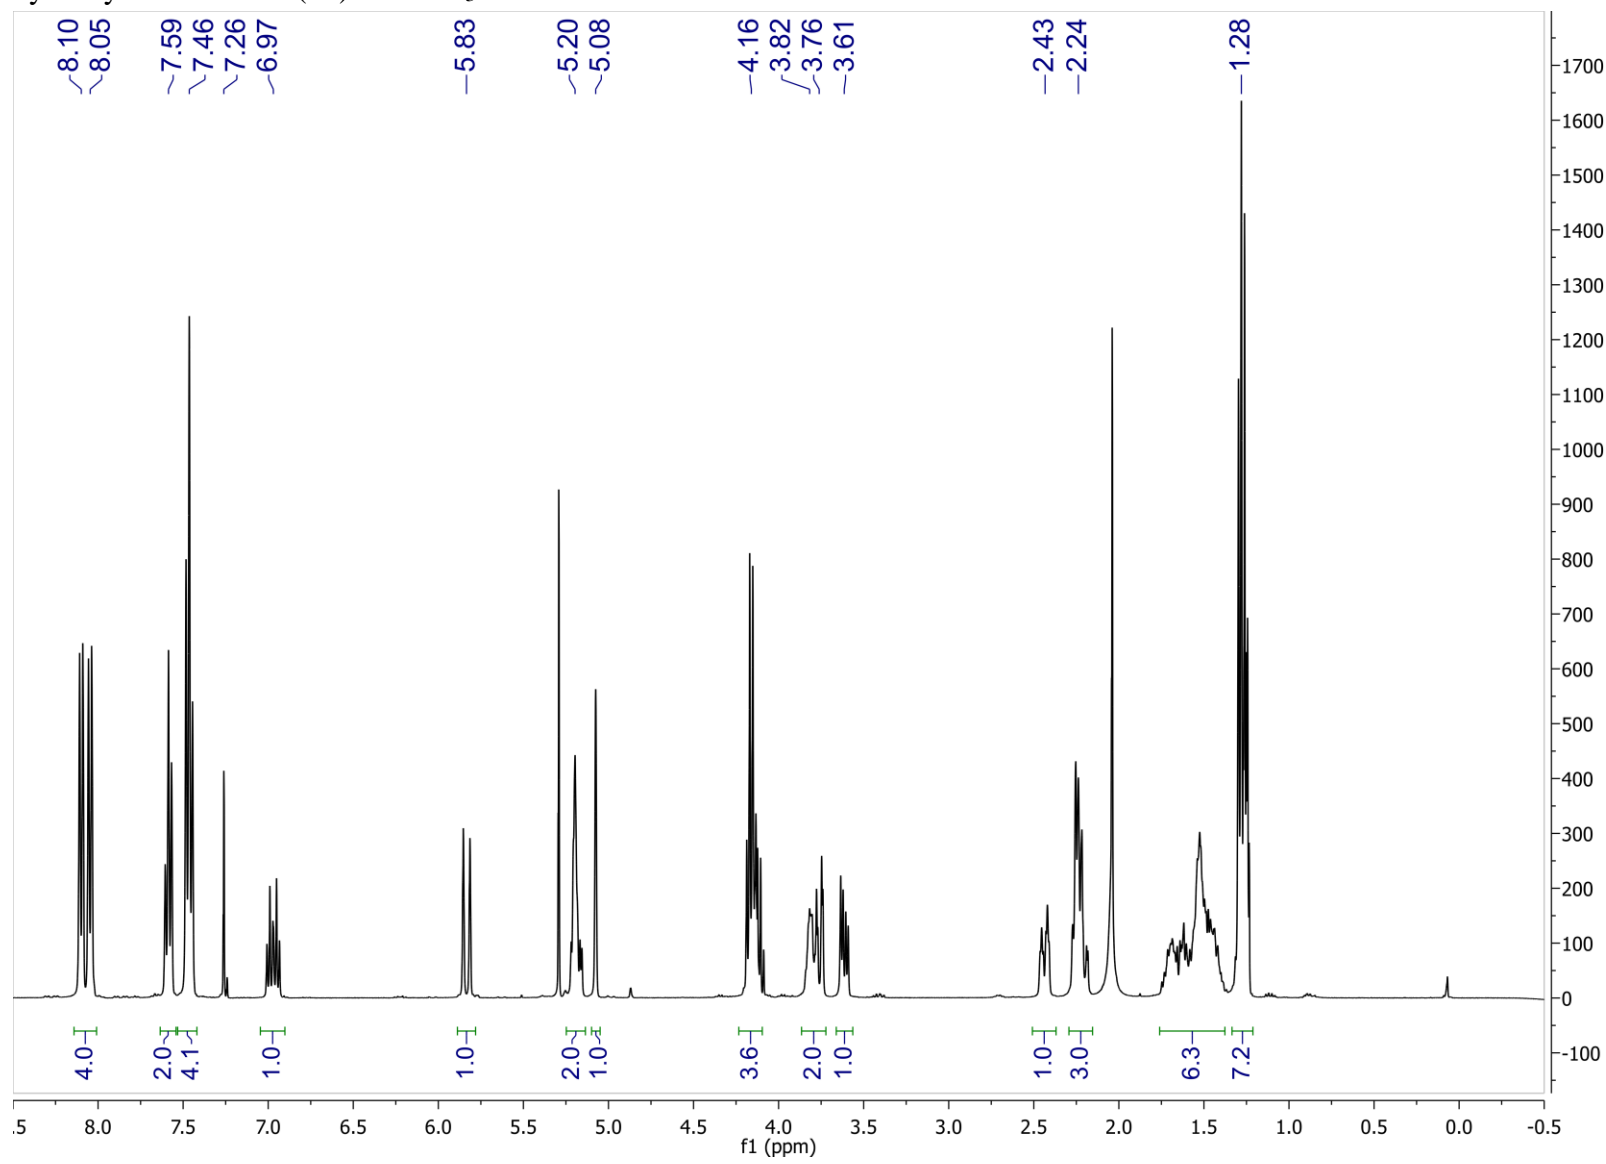

**Figure S73:**  $^{13}\text{C}$  NMR spectrum of synthetic (2*E*,8*S*)-Ethyl 8-[(2,4-di-*O*-benzoyl-3,6-dideoxy- $\alpha$ -L-*arabino*-hexopyranosyl)oxy]-9-hydroxy-2-nonenoate (**28**) in  $\text{CDCl}_3$ .

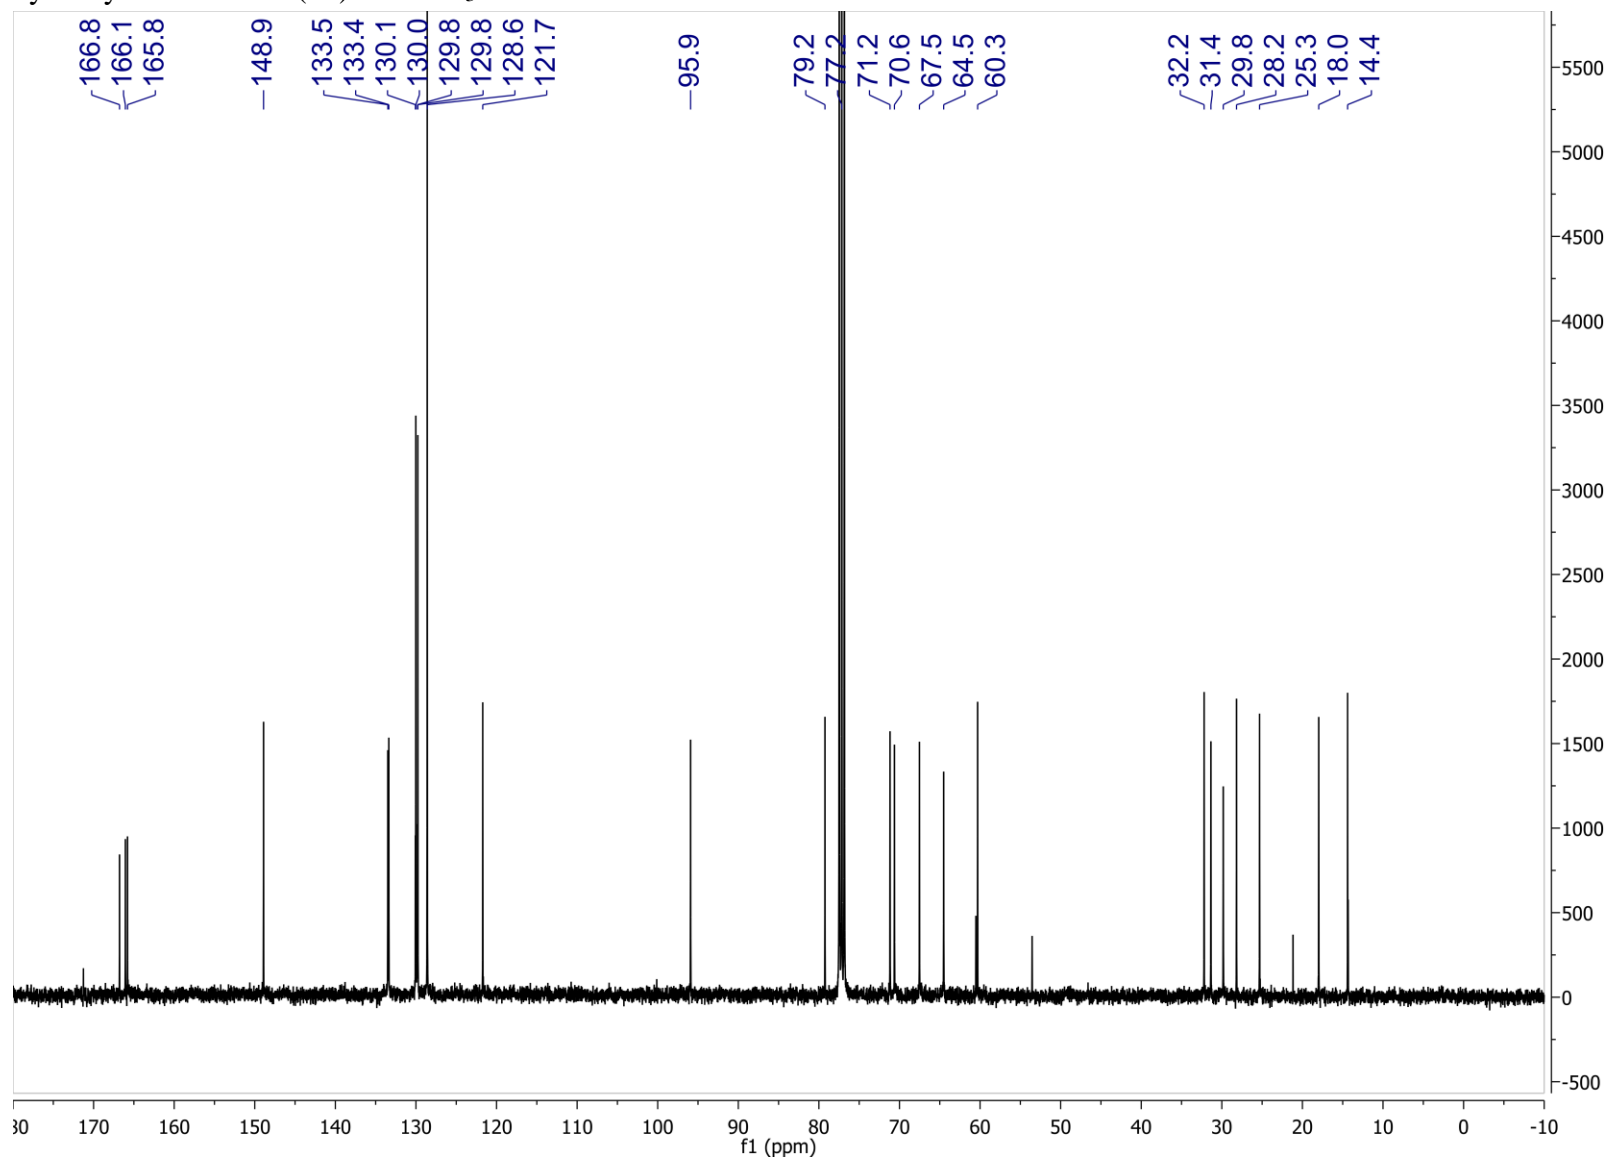

**Figure S74:** dqf-COSY spectrum of synthetic (2*E*,8*S*)-Ethyl 8-[(2,4-di-*O*-benzoyl-3,6-dideoxy- $\alpha$ -L-*arabino*-hexopyranosyl)oxy]-9-hydroxy-2-nonenoate (**28**) in CDCl<sub>3</sub>.

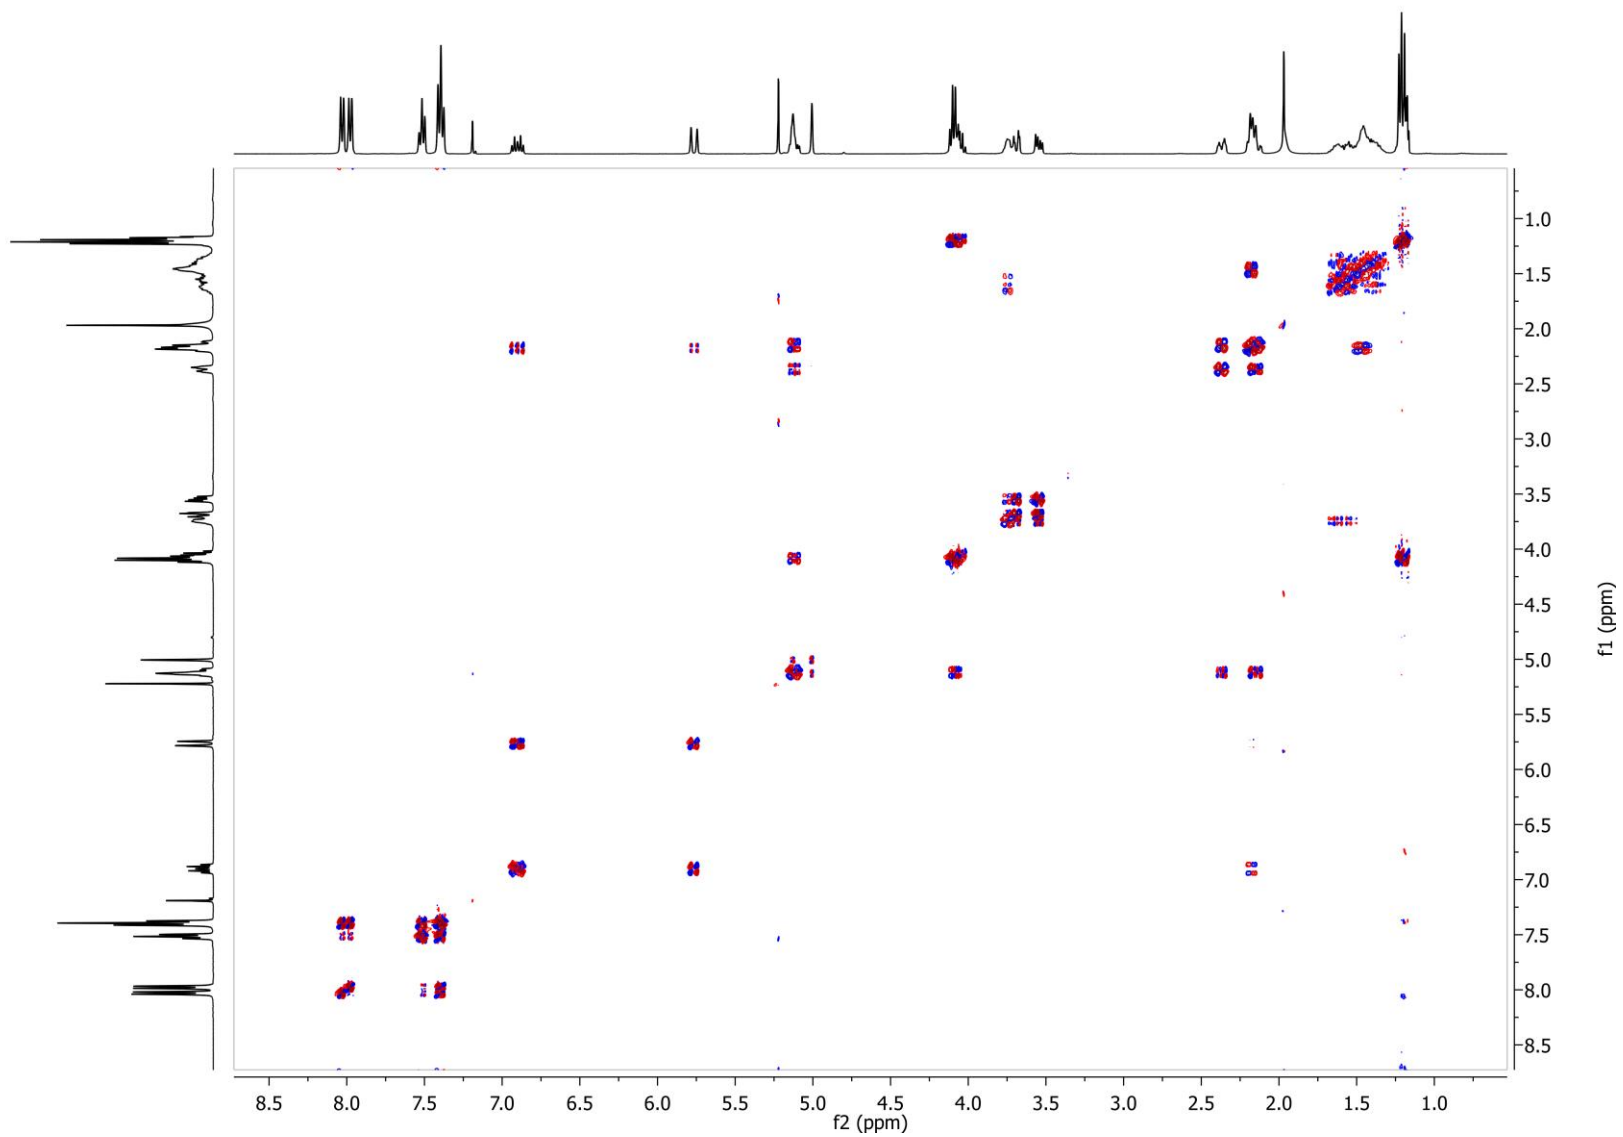

**Figure S75:** HMQC spectrum of synthetic (2*E*,8*S*)-Ethyl 8-[(2,4-di-*O*-benzoyl-3,6-dideoxy- $\alpha$ -L-*arabino*-hexopyranosyl)oxy]-9-hydroxy-2-nonenoate (**28**) in CD<sub>3</sub>OD.

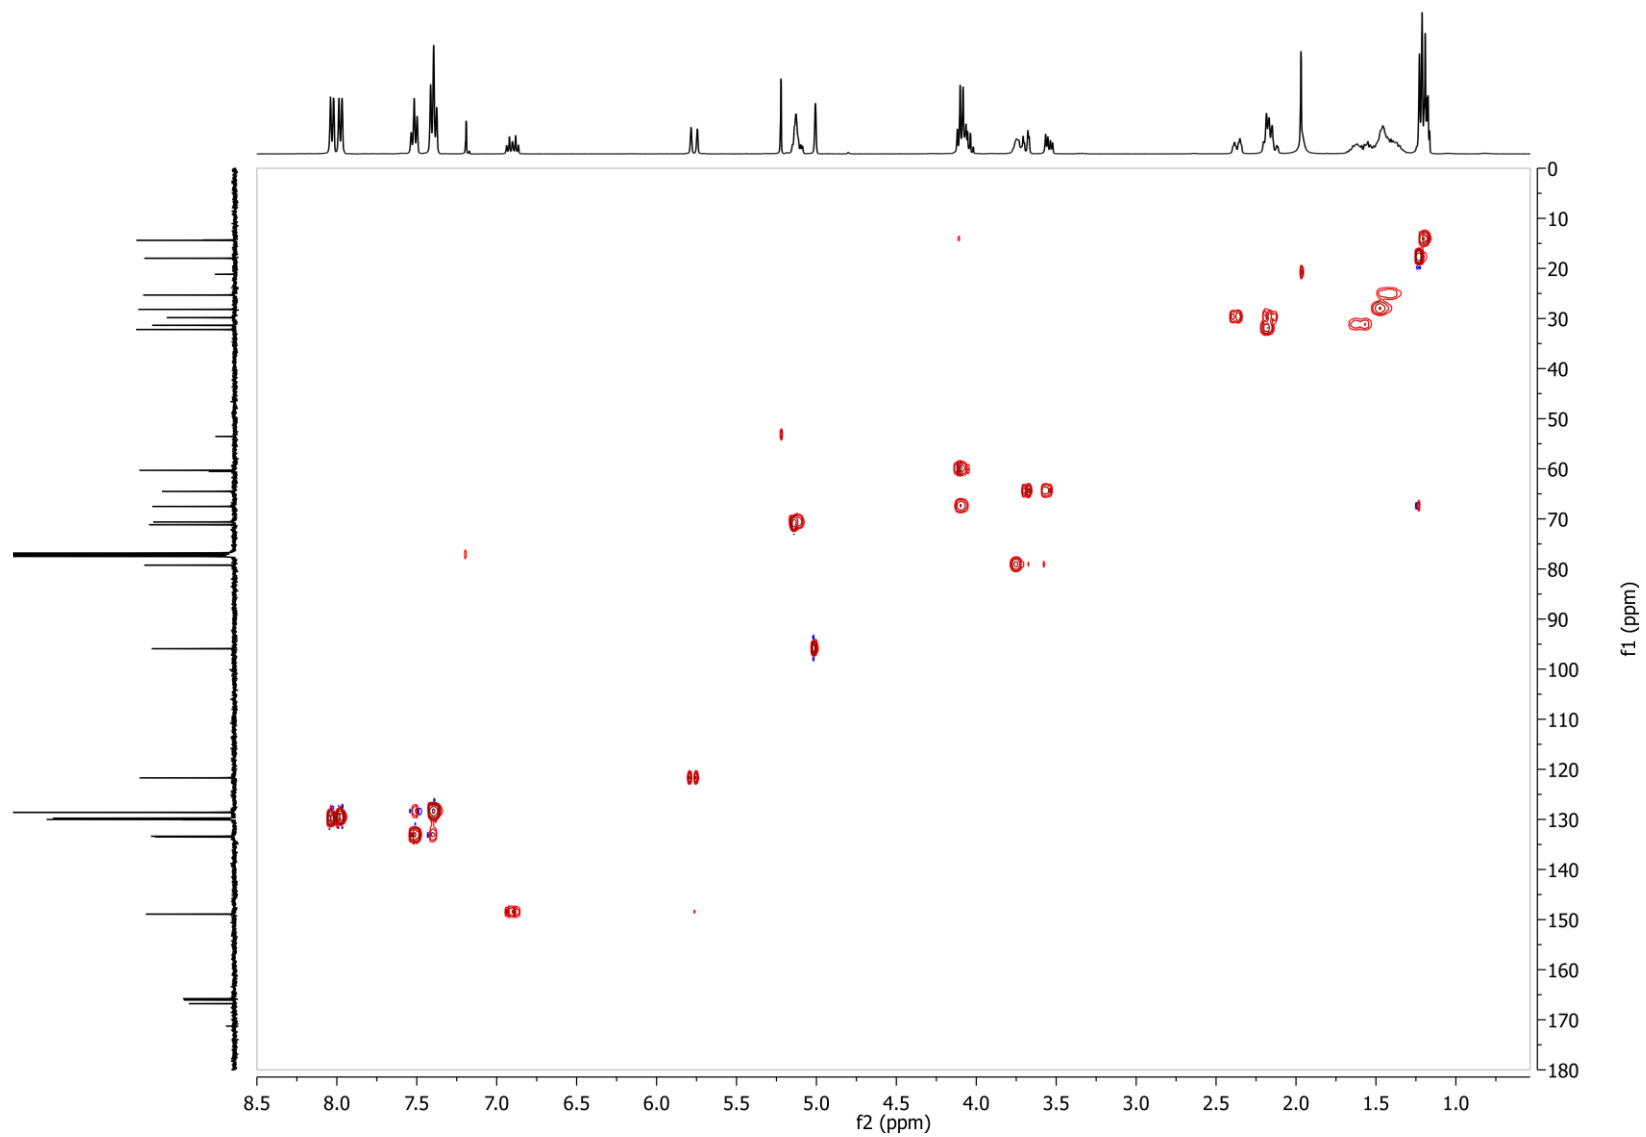



**Figure S76:**  $^1\text{H}$  NMR spectrum of synthetic (2*E*,8*S*)-8-[(3,6-Dideoxy- $\alpha$ -L-arabino-hexopyranosyl)oxy]-9-hydroxy-2-nonenic acid (asc-9OH- $\Delta$ C9) (**12**) in  $\text{CD}_3\text{OD}$ .

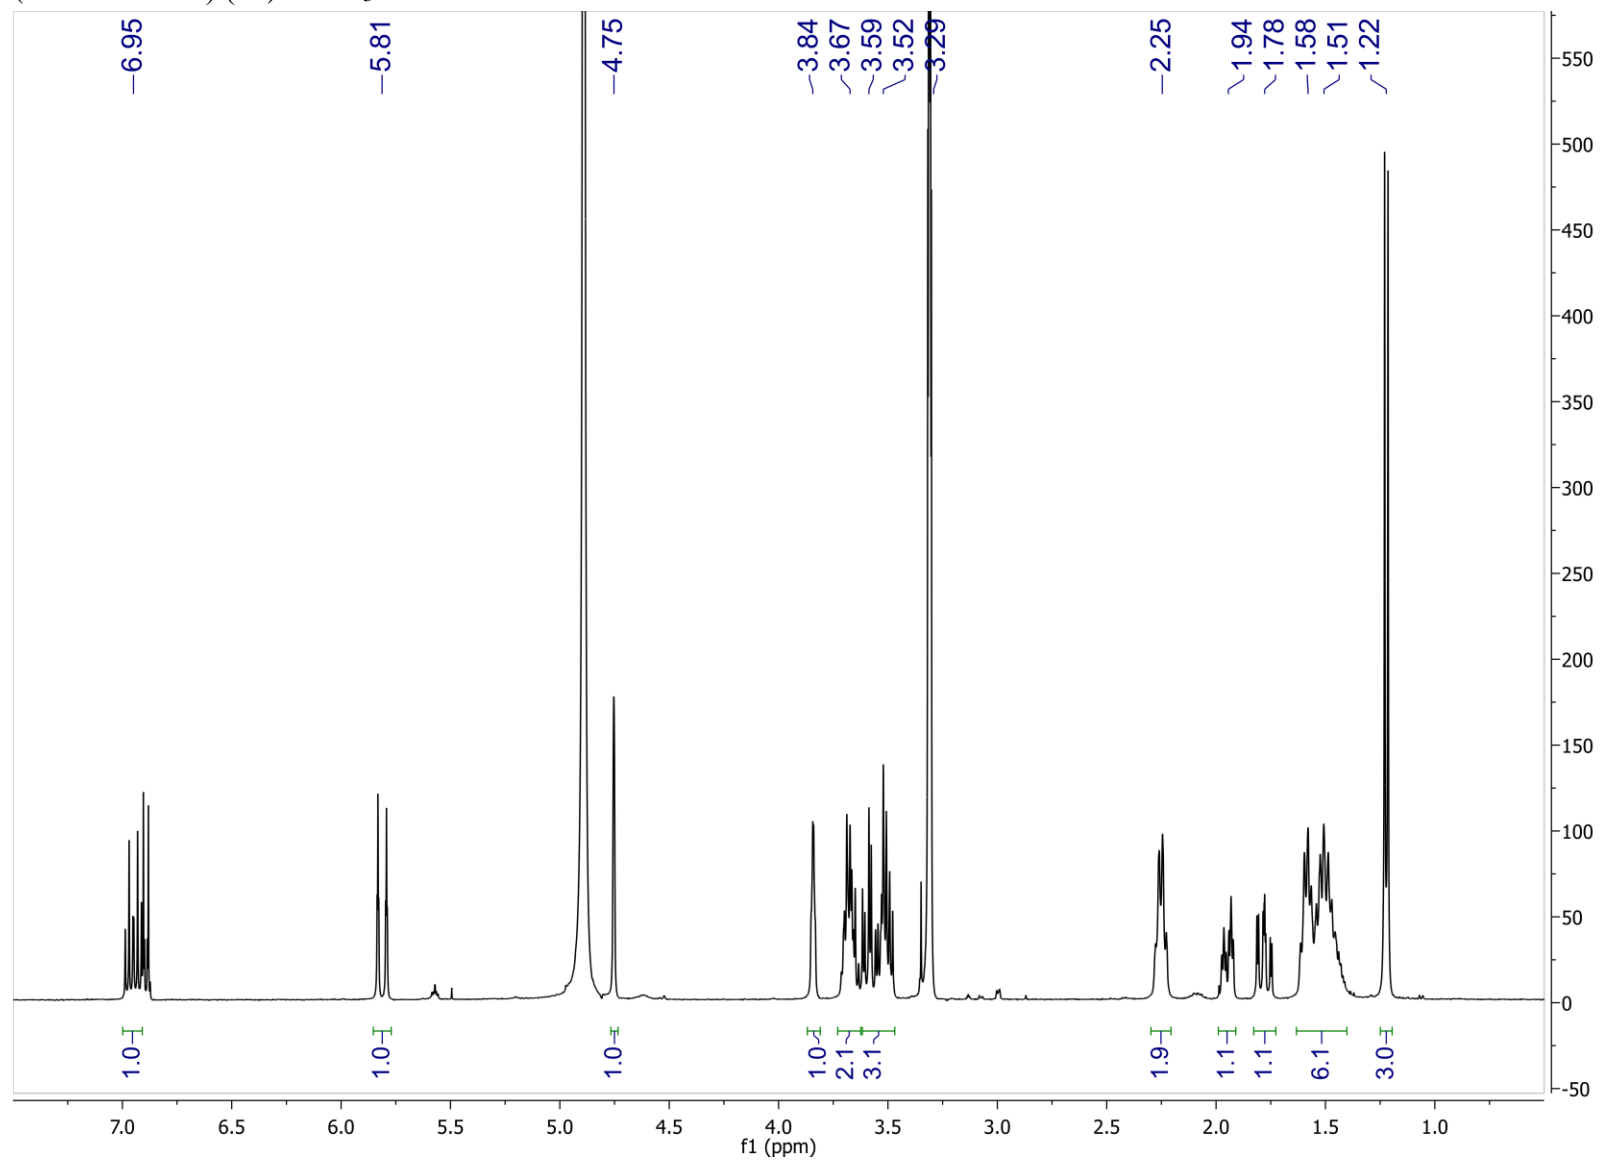

**Figure S77:**  $^{13}\text{C}$  NMR spectrum of synthetic (2*E*,8*S*)-8-[(3,6-Dideoxy- $\alpha$ -L-*arabino*-hexopyranosyl)oxy]-9-hydroxy-2-nonenic acid (asc-9OH- $\Delta$ C9) (**12**) in  $\text{CD}_3\text{OD}$ .

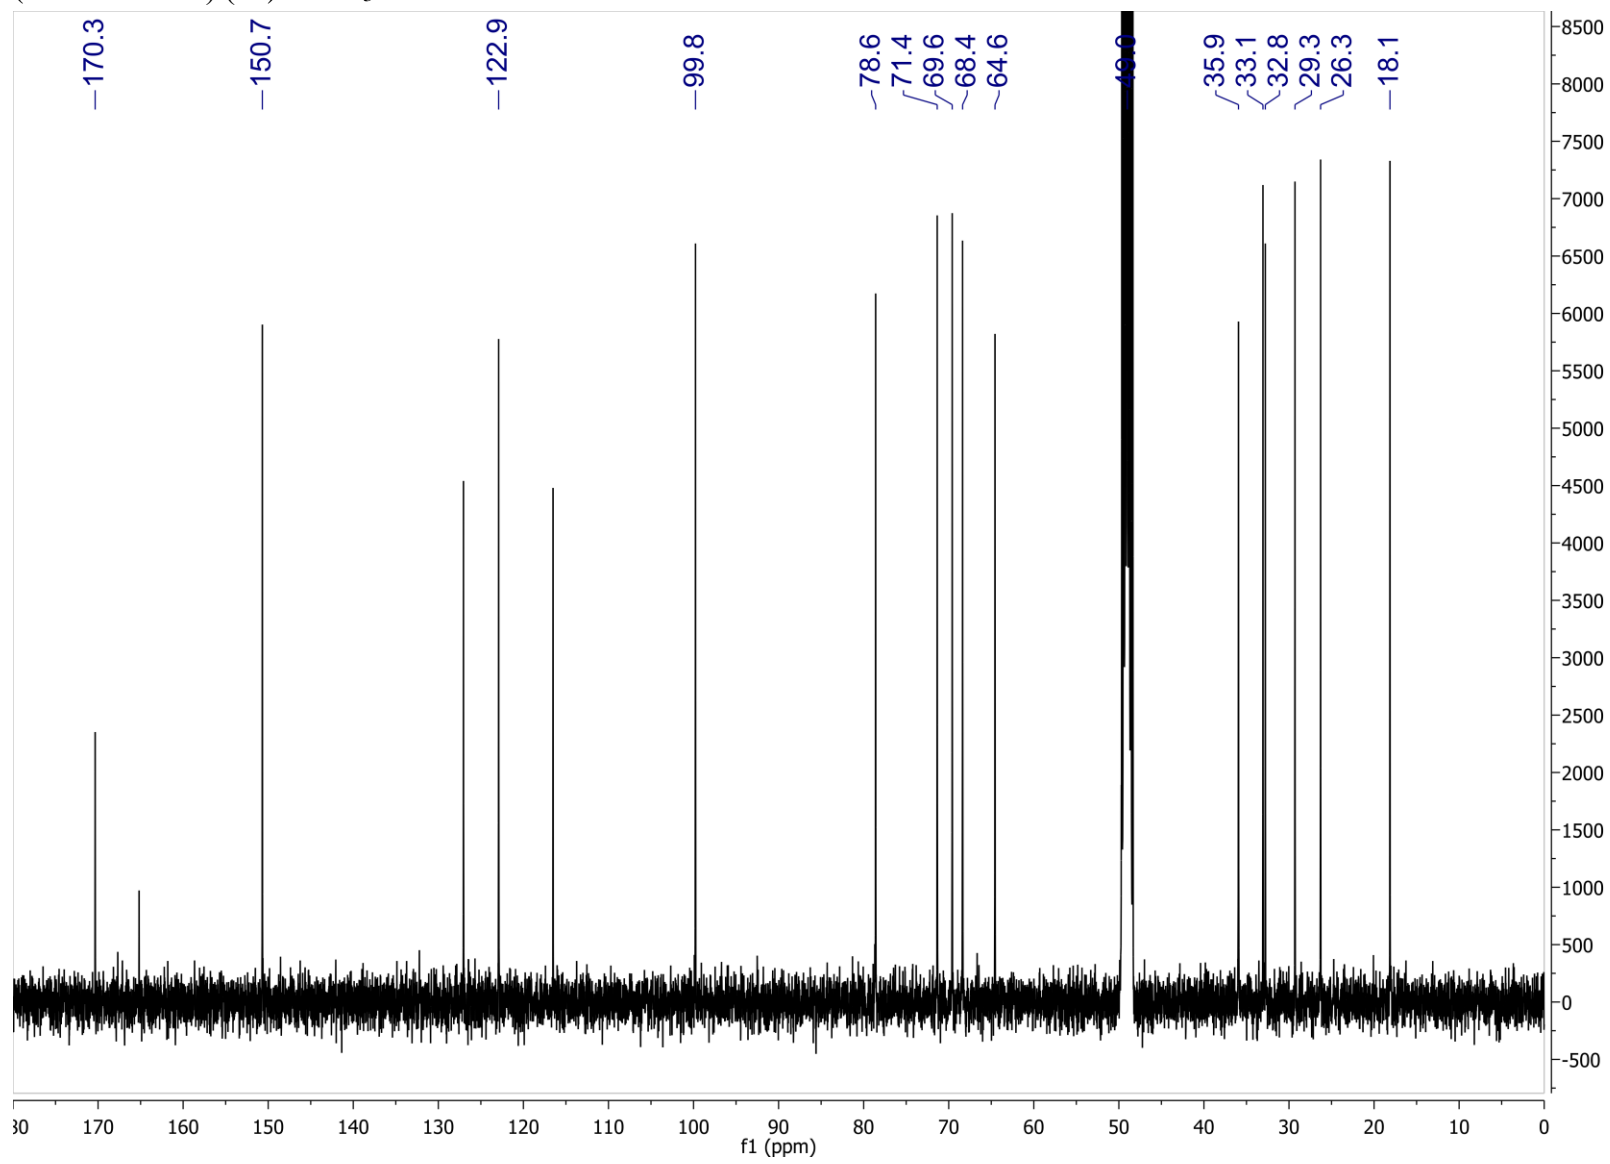

**Figure S78:** dqf-COSY spectrum of synthetic (2*E*,8*S*)-8-[(3,6-Dideoxy- $\alpha$ -L-*arabino*-hexopyranosyl)oxy]-9-hydroxy-2-nonenic acid (asc-9OH- $\Delta$ C9) (**12**) in CD<sub>3</sub>OD.

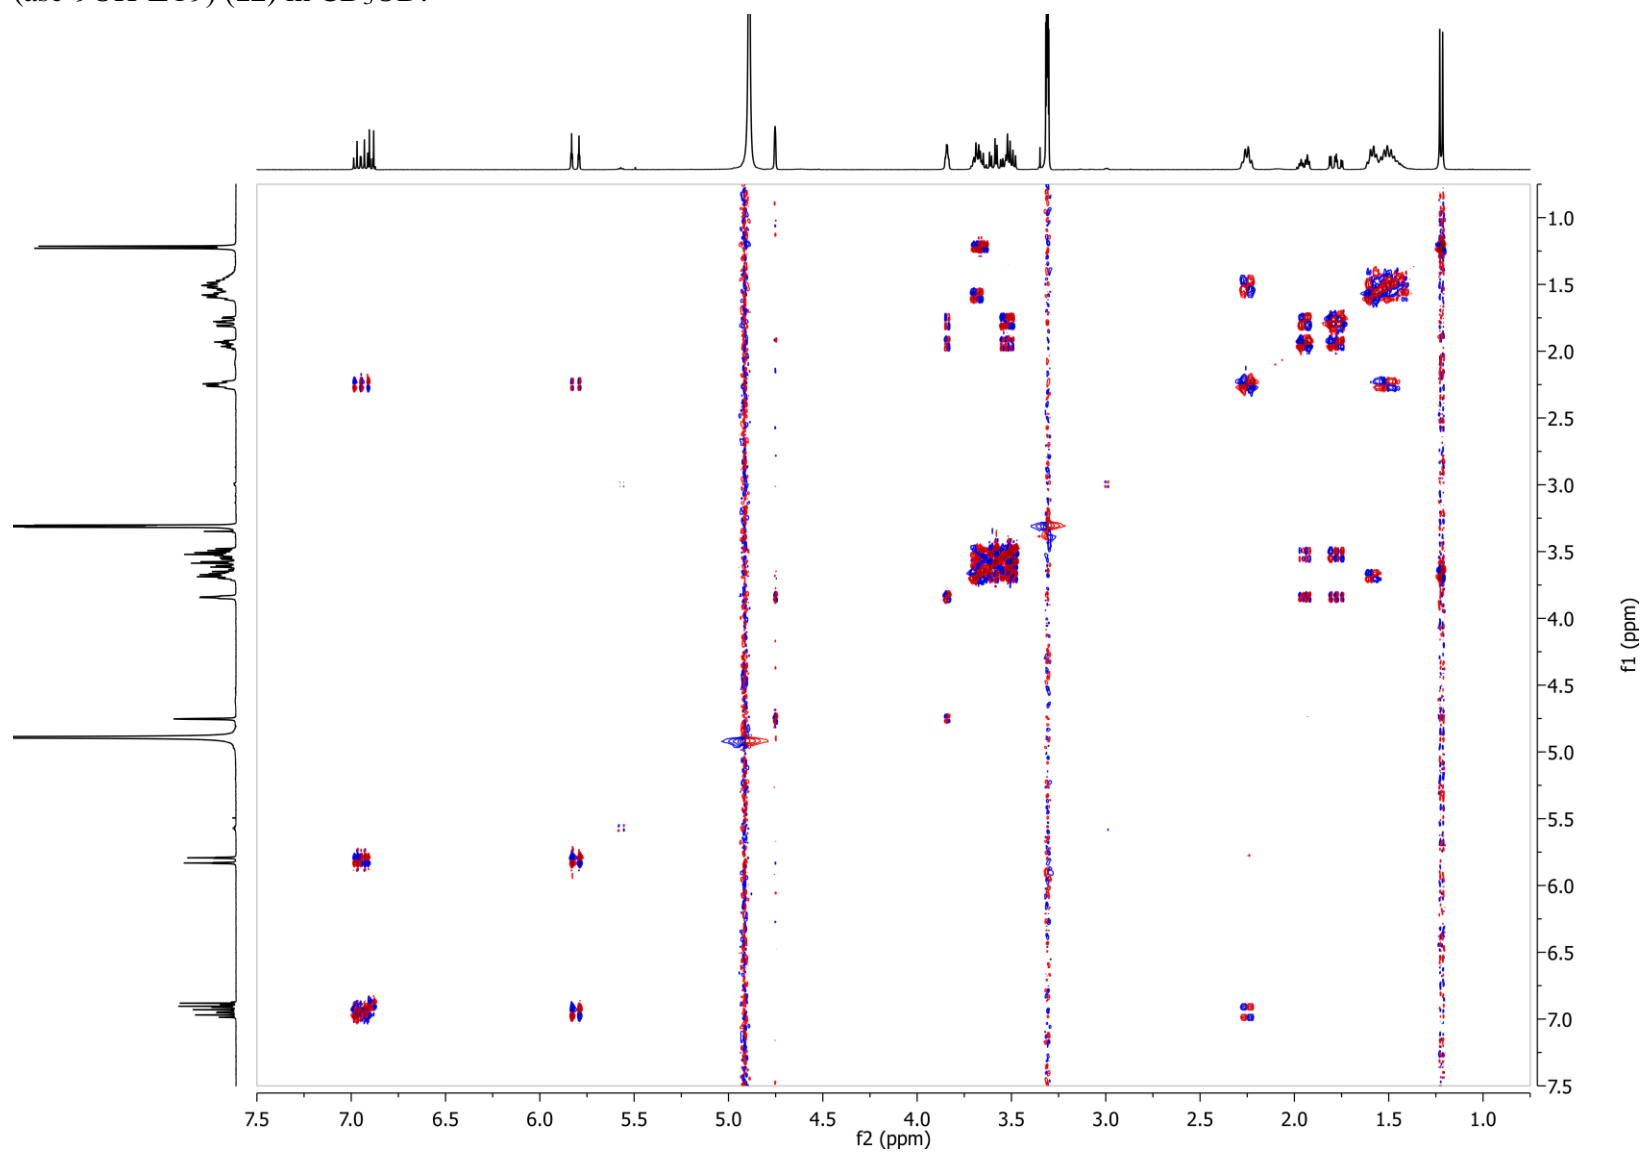

**Figure S79:** HMQC spectrum of synthetic (2*E*,8*S*)-8-[(3,6-Dideoxy- $\alpha$ -L-*arabino*-hexopyranosyl)oxy]-9-hydroxy-2-nonenic acid (asc-9OH- $\Delta$ C9) (**12**) in CD<sub>3</sub>OD.

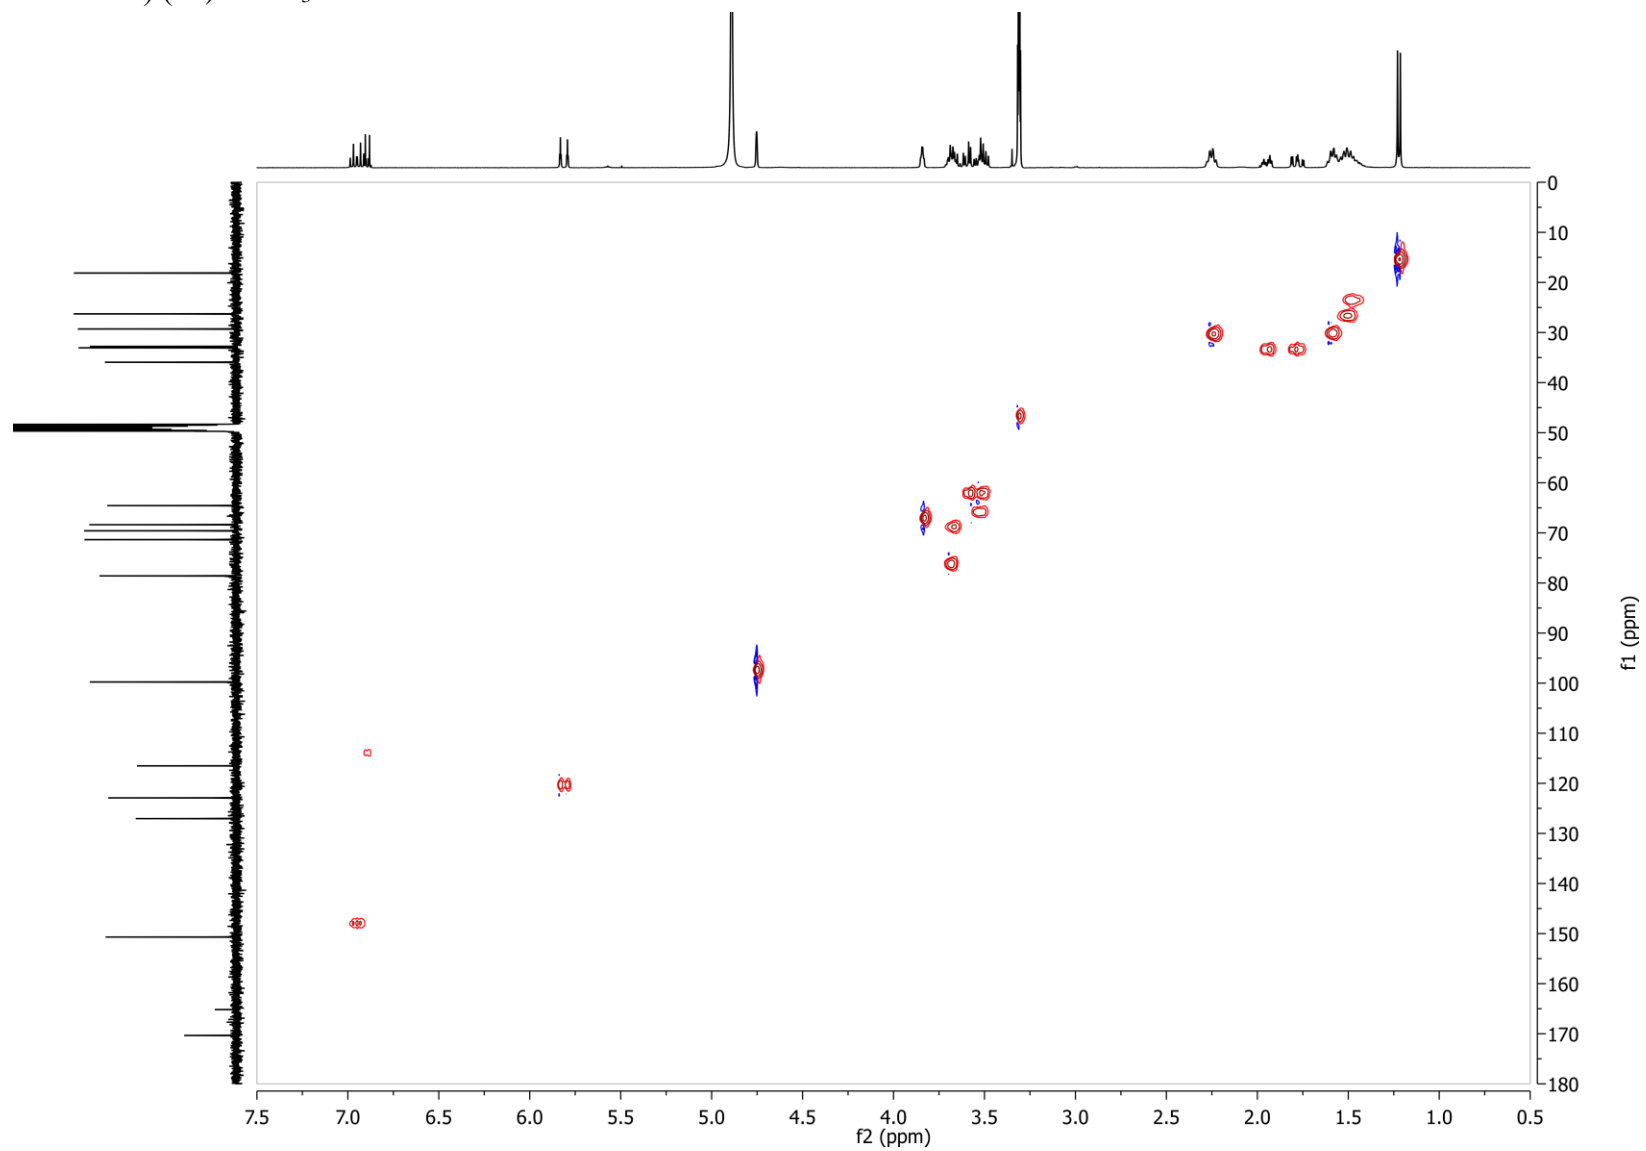

**Figure S80:**  $^1\text{H}$  NMR spectrum of synthetic (7*S*)-7-[(3,6-Dideoxy- $\alpha$ -L-arabino-hexopyranosyl)oxy]oxocan-2-yl)-acetic acid (**29**) in  $\text{CD}_3\text{OD}$ .

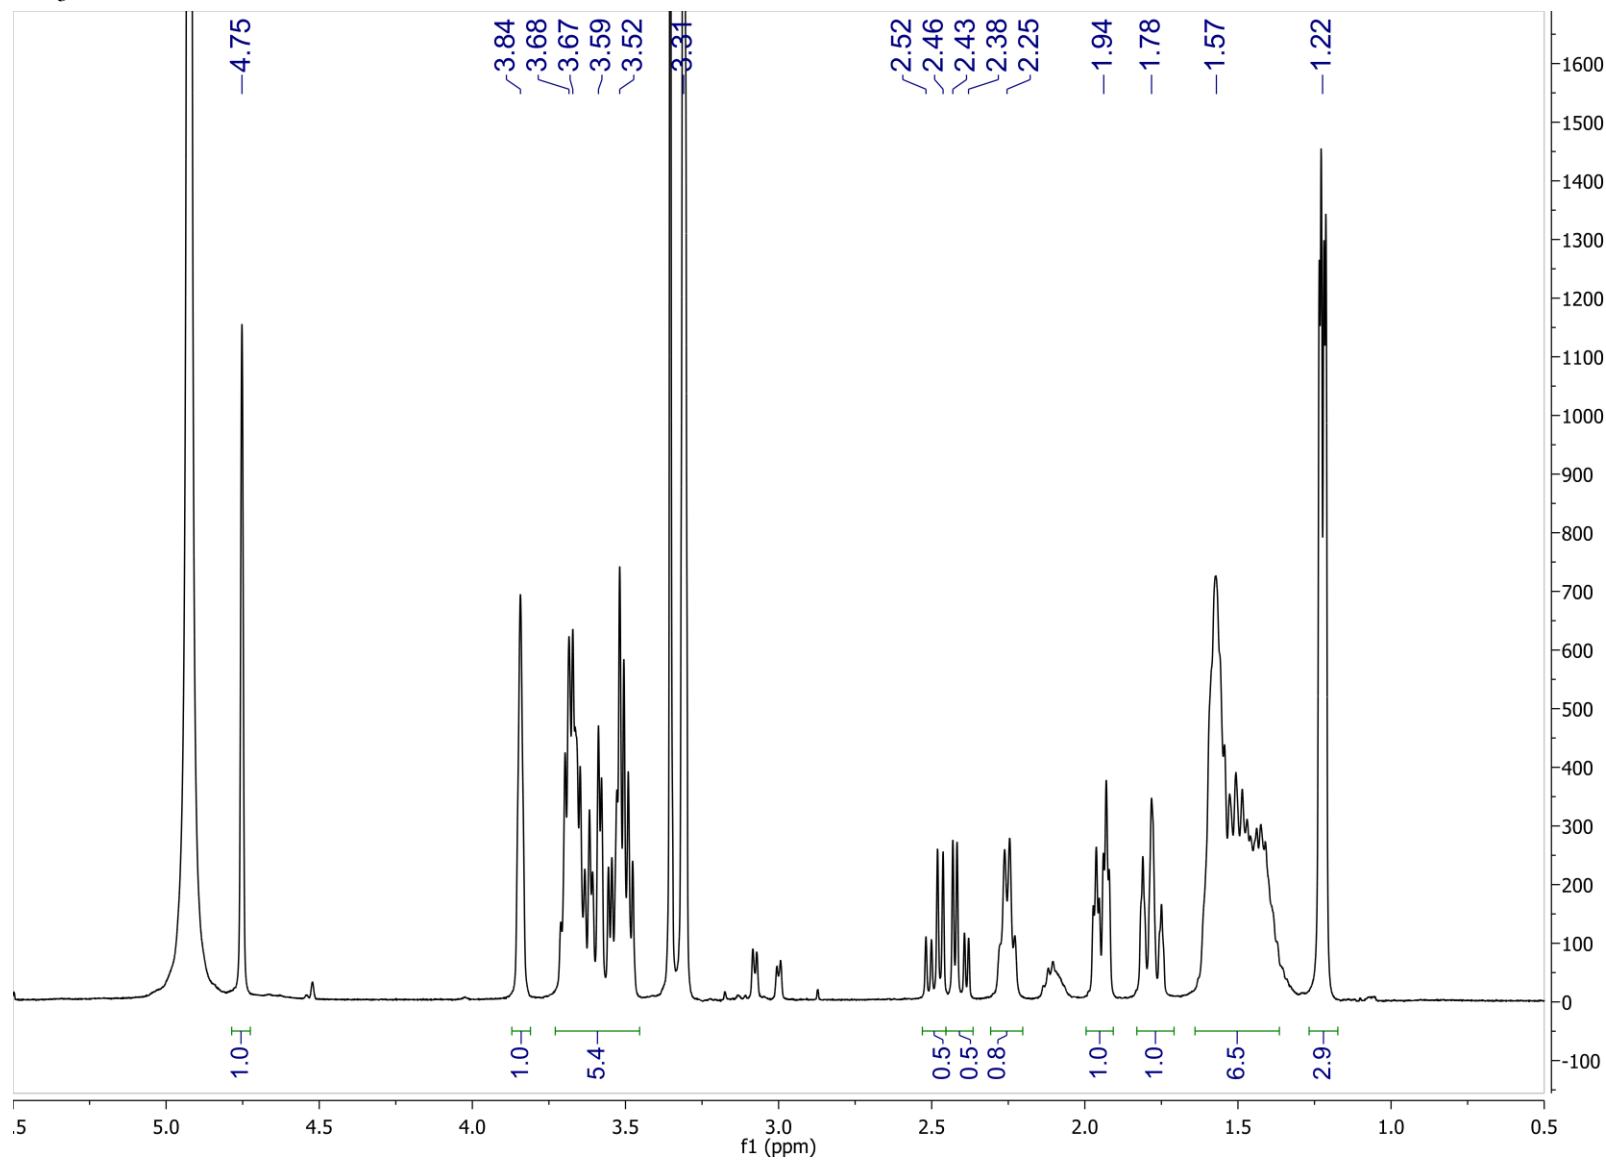

**Figure S81:**  $^{13}\text{C}$  NMR spectrum of synthetic (7*S*)-7-[(3,6-Dideoxy- $\alpha$ -L-arabino-hexopyranosyl)oxy]oxocan-2-yl)-acetic acid (**29**) in  $\text{CD}_3\text{OD}$ .

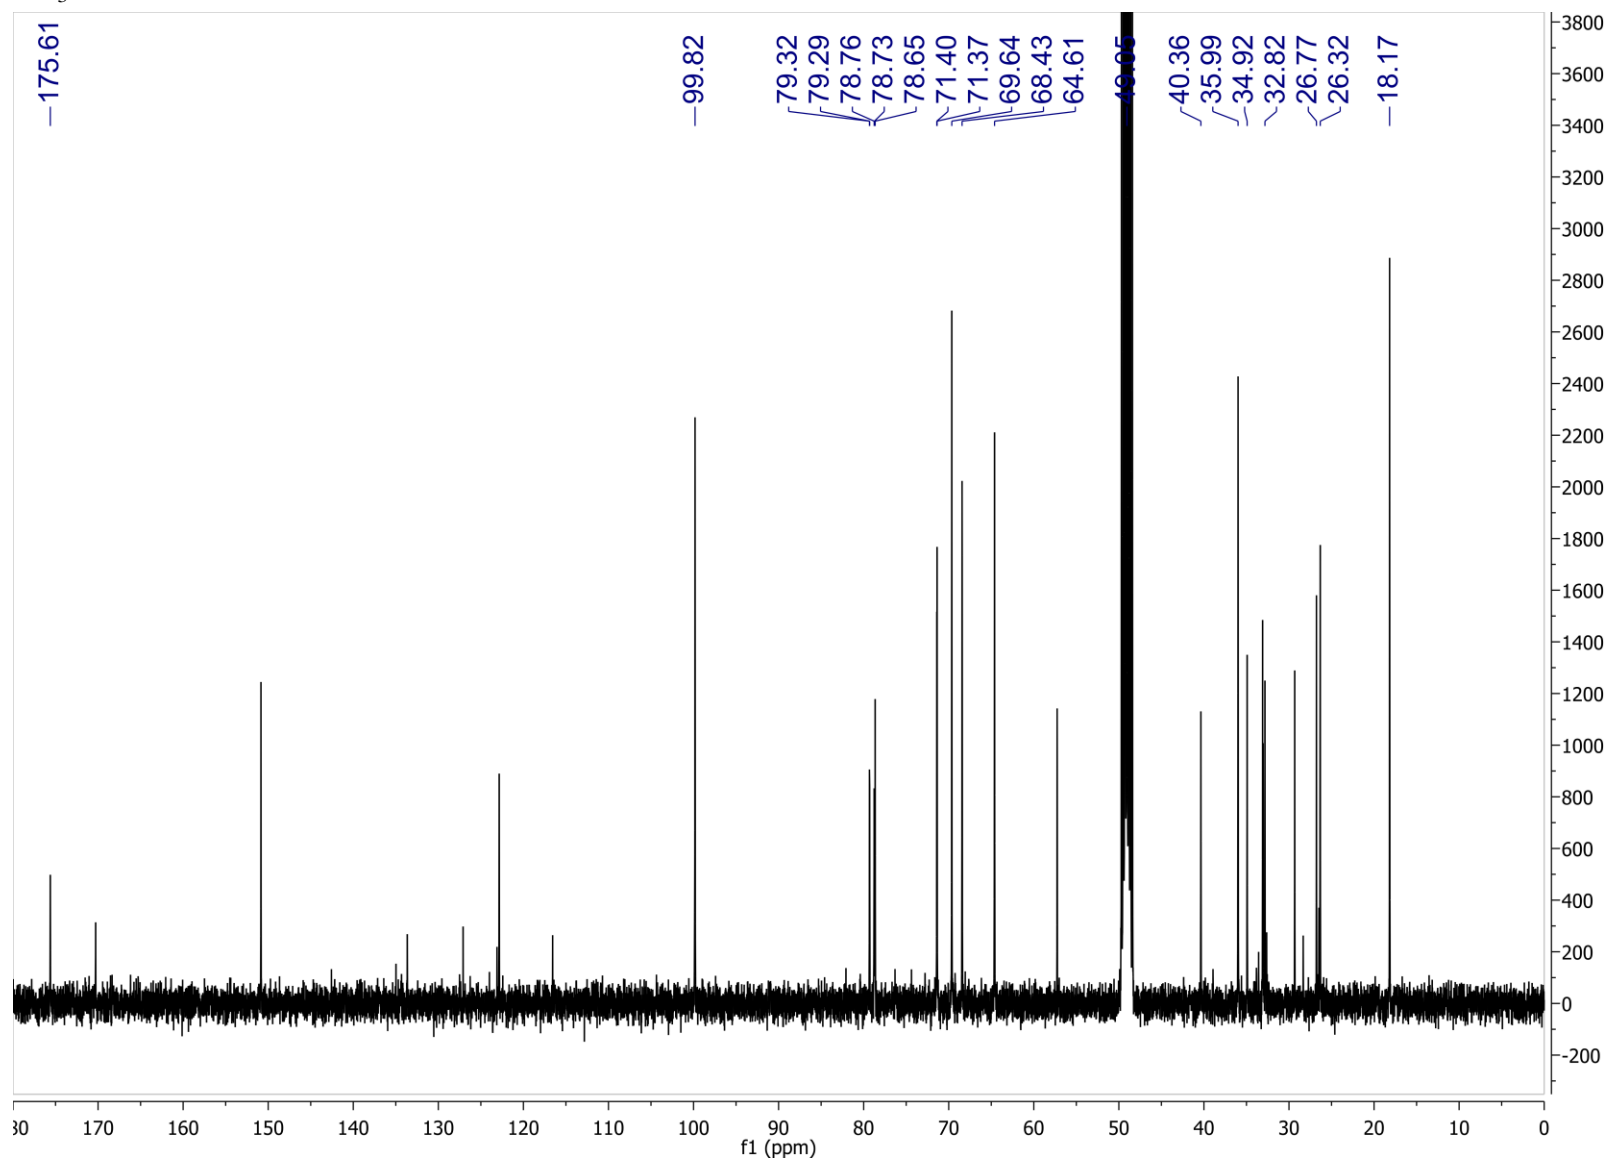

**Figure S82:** dqf-COSY spectrum of synthetic (7*S*)-7-[(3,6-Dideoxy- $\alpha$ -L-*arabino*-hexopyranosyl)oxy]oxocan-2-yl)-acetic acid (**29**) in CD<sub>3</sub>OD.

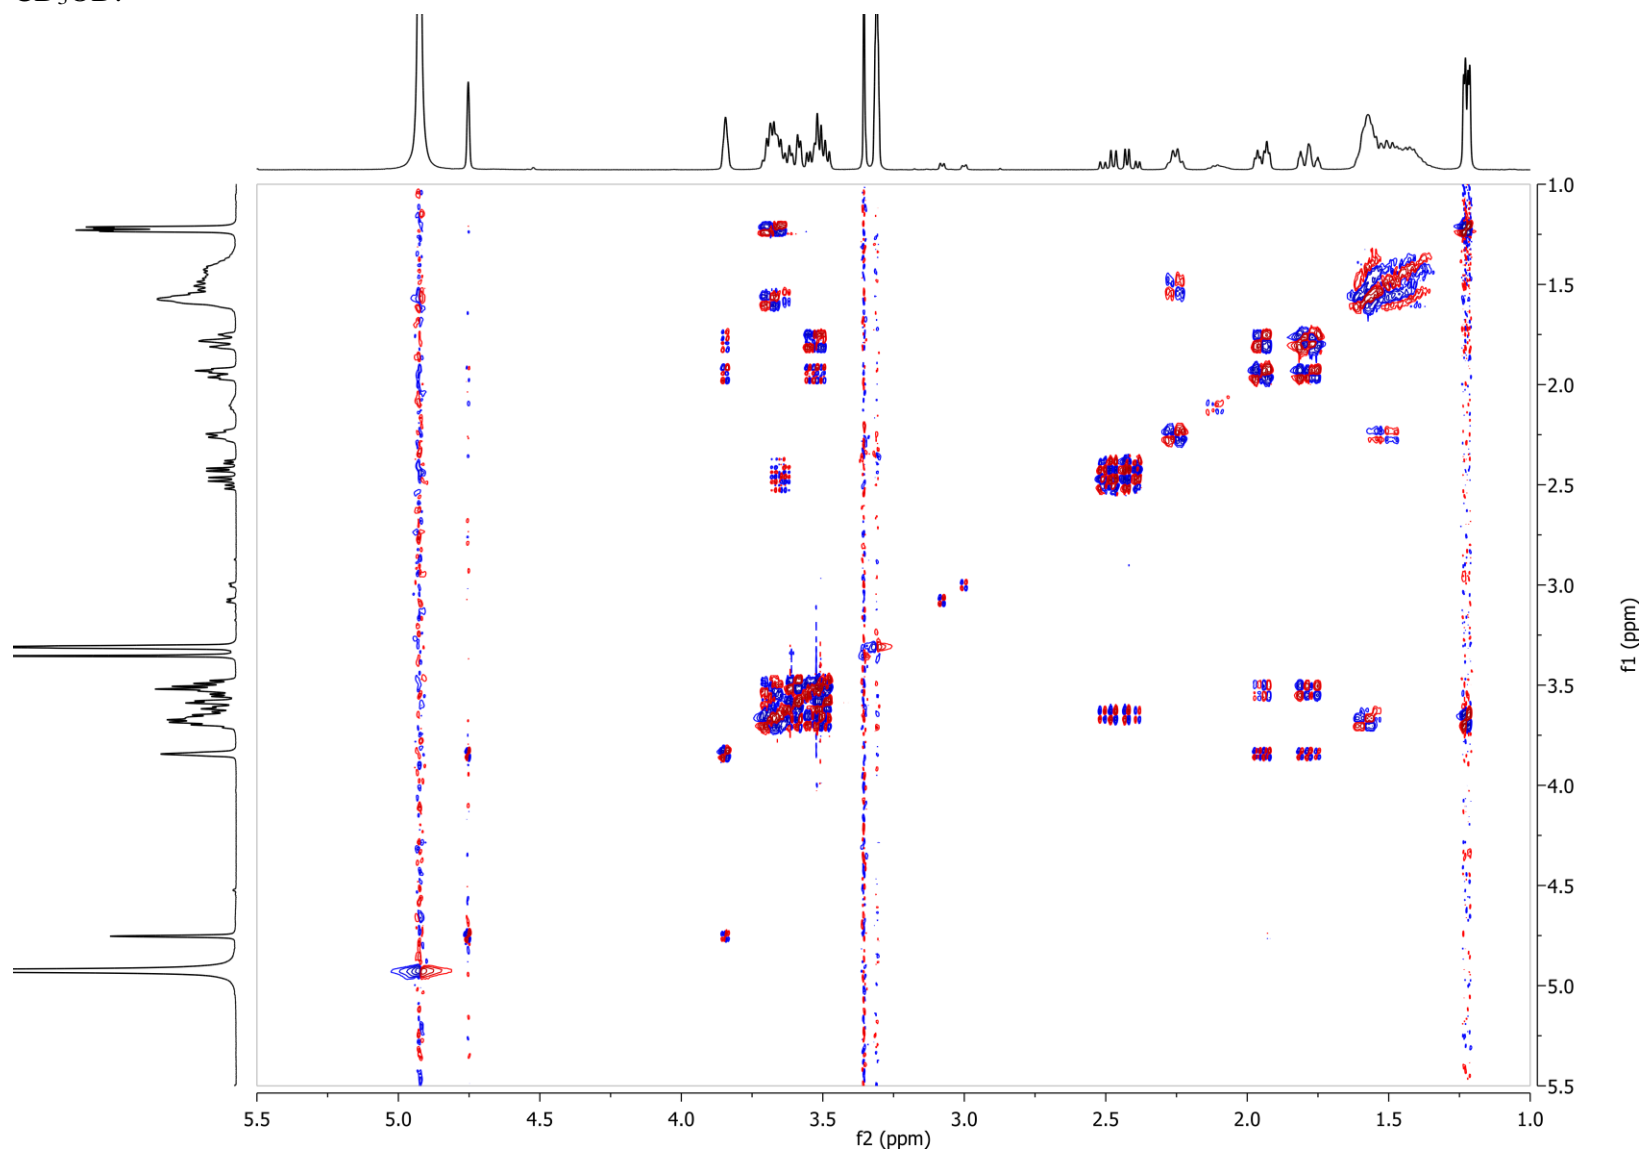

**Figure S83:** HMQC spectrum of synthetic (7*S*)-7-[(3,6-Dideoxy- $\alpha$ -L-arabino-hexopyranosyl)oxy]oxocan-2-yl)-acetic acid (**29**) in CD<sub>3</sub>OD.

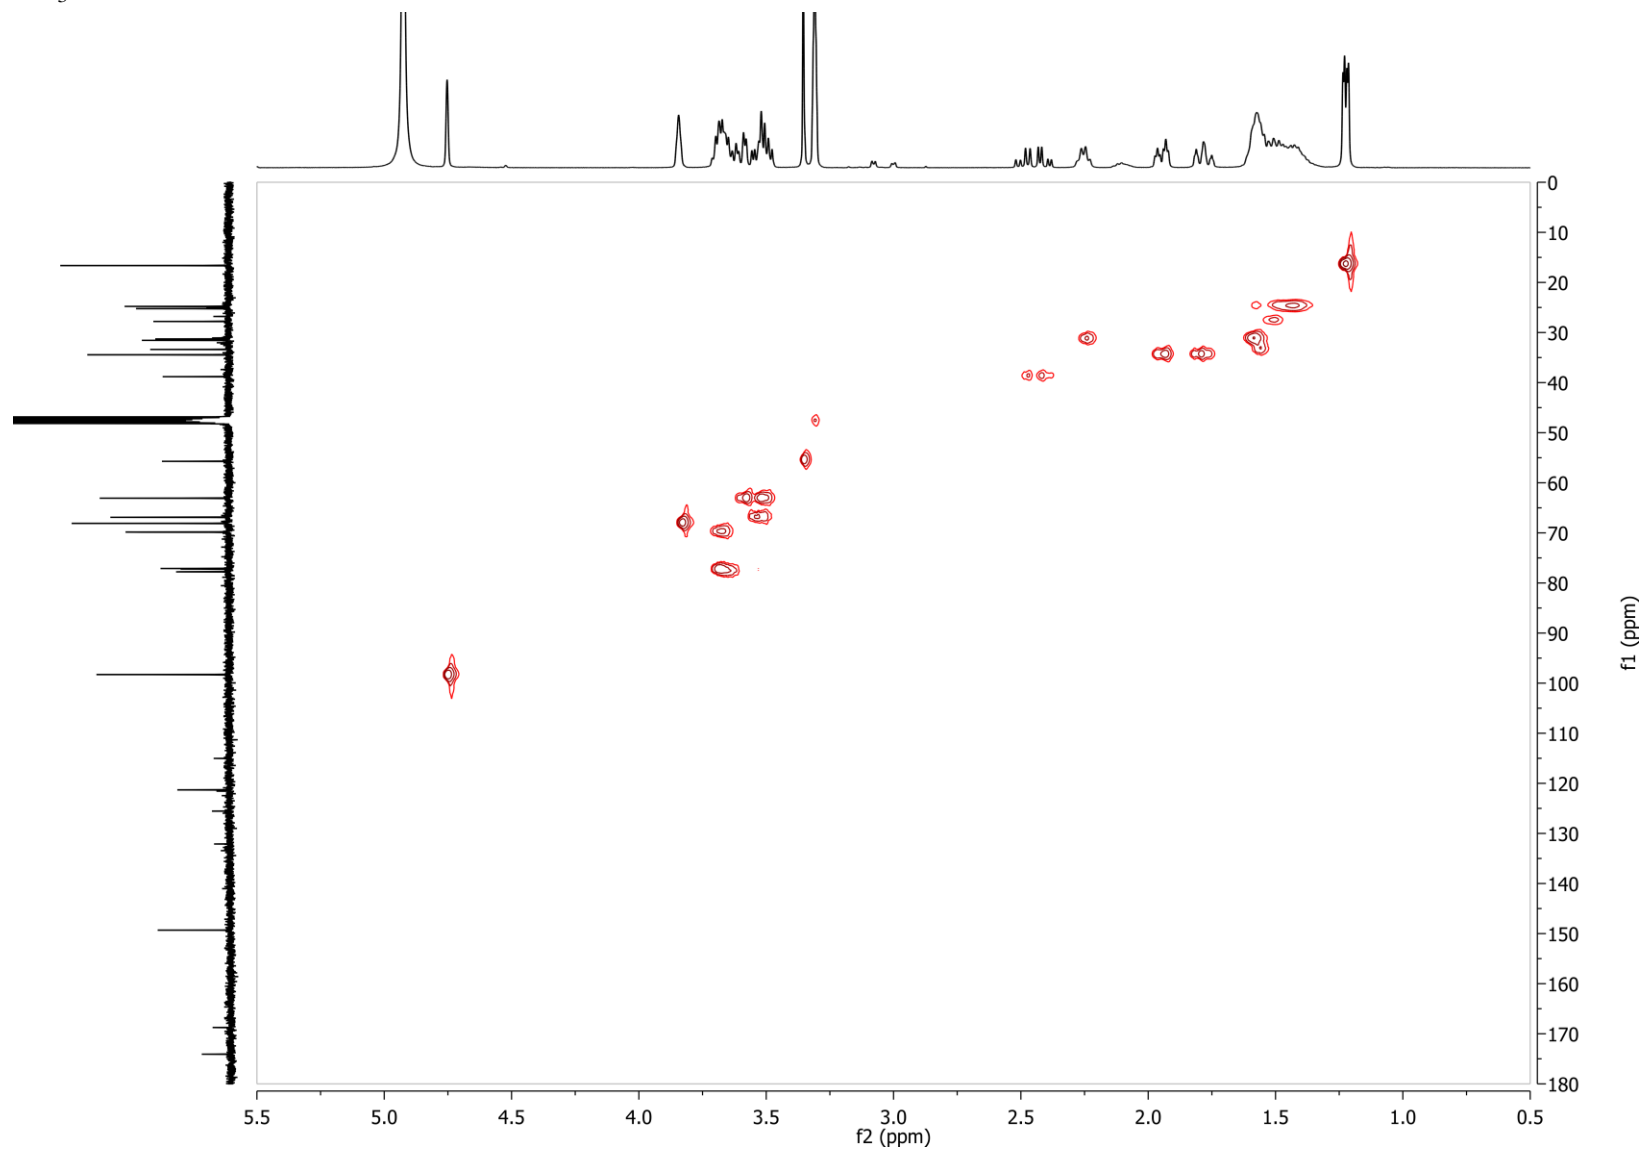



**Figure S84:**  $^1\text{H}$  NMR spectrum of *C. nigoni* exometabolome fraction SPE40 in  $\text{CD}_3\text{OD}$ .

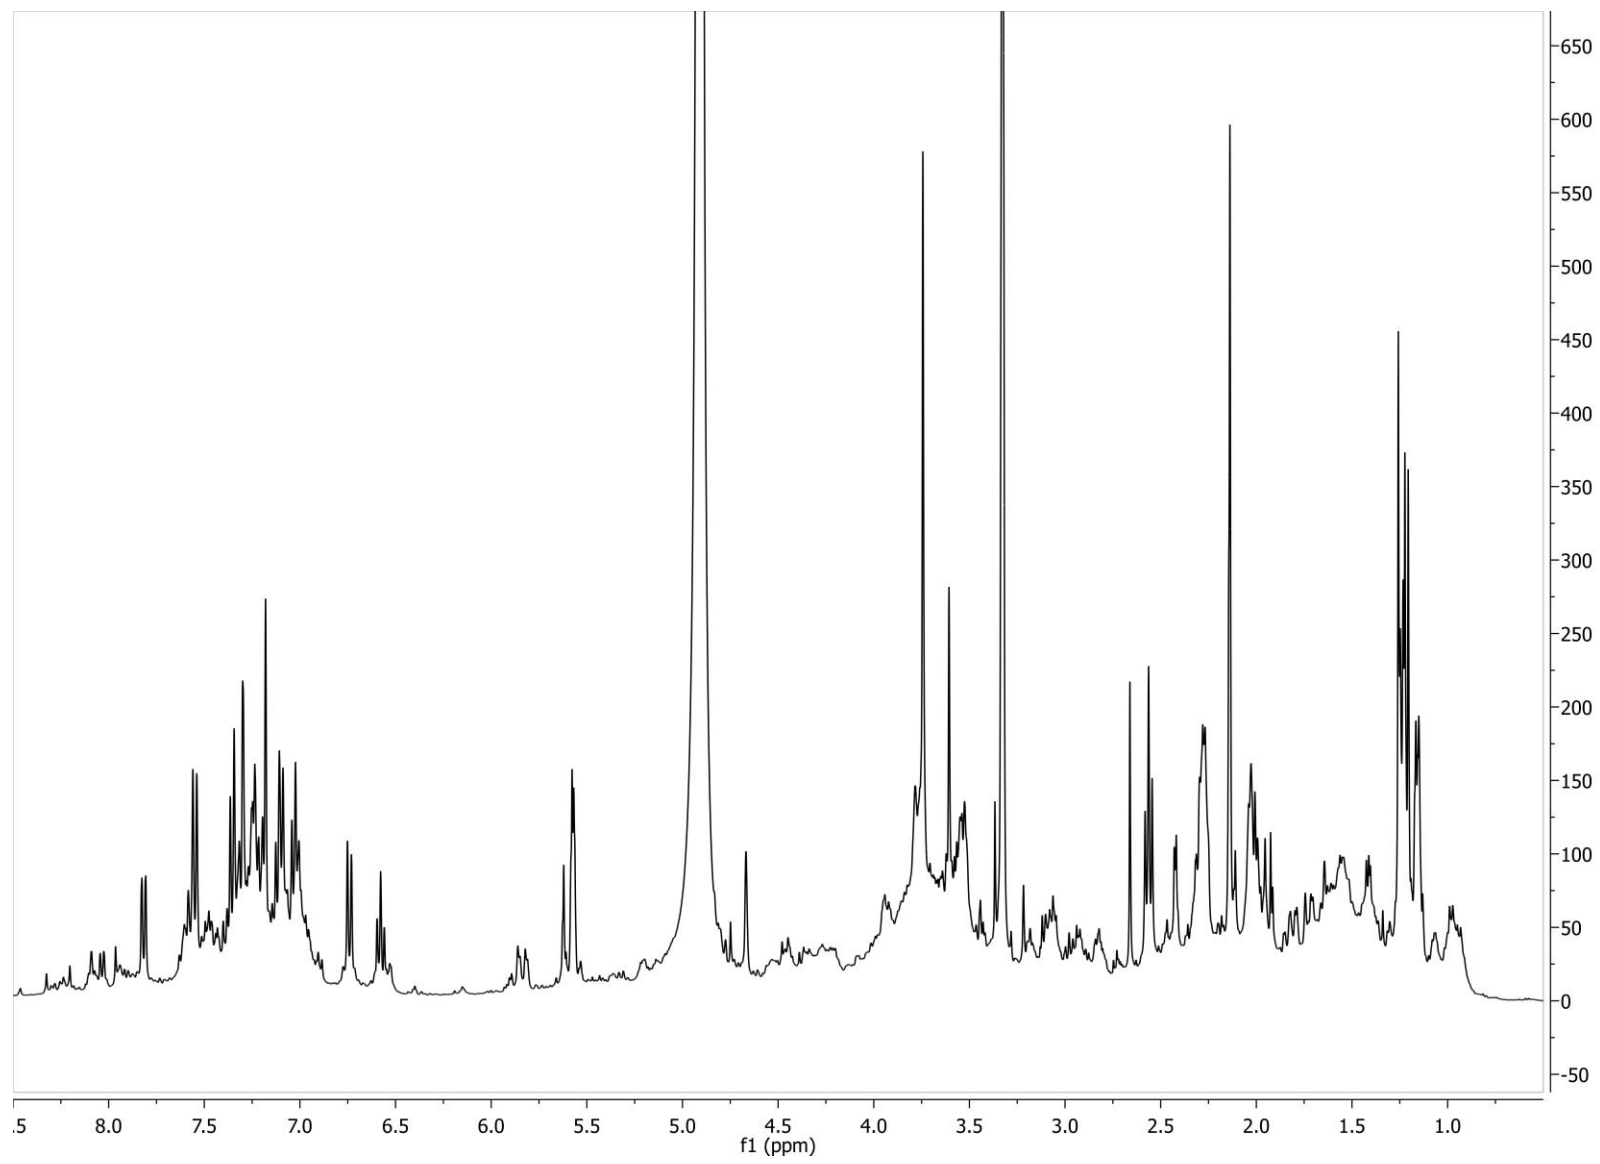

**Figure S85:** dqf-COSY spectrum of *C. nigoni* exometabolome fraction SPE40 in CD<sub>3</sub>OD.

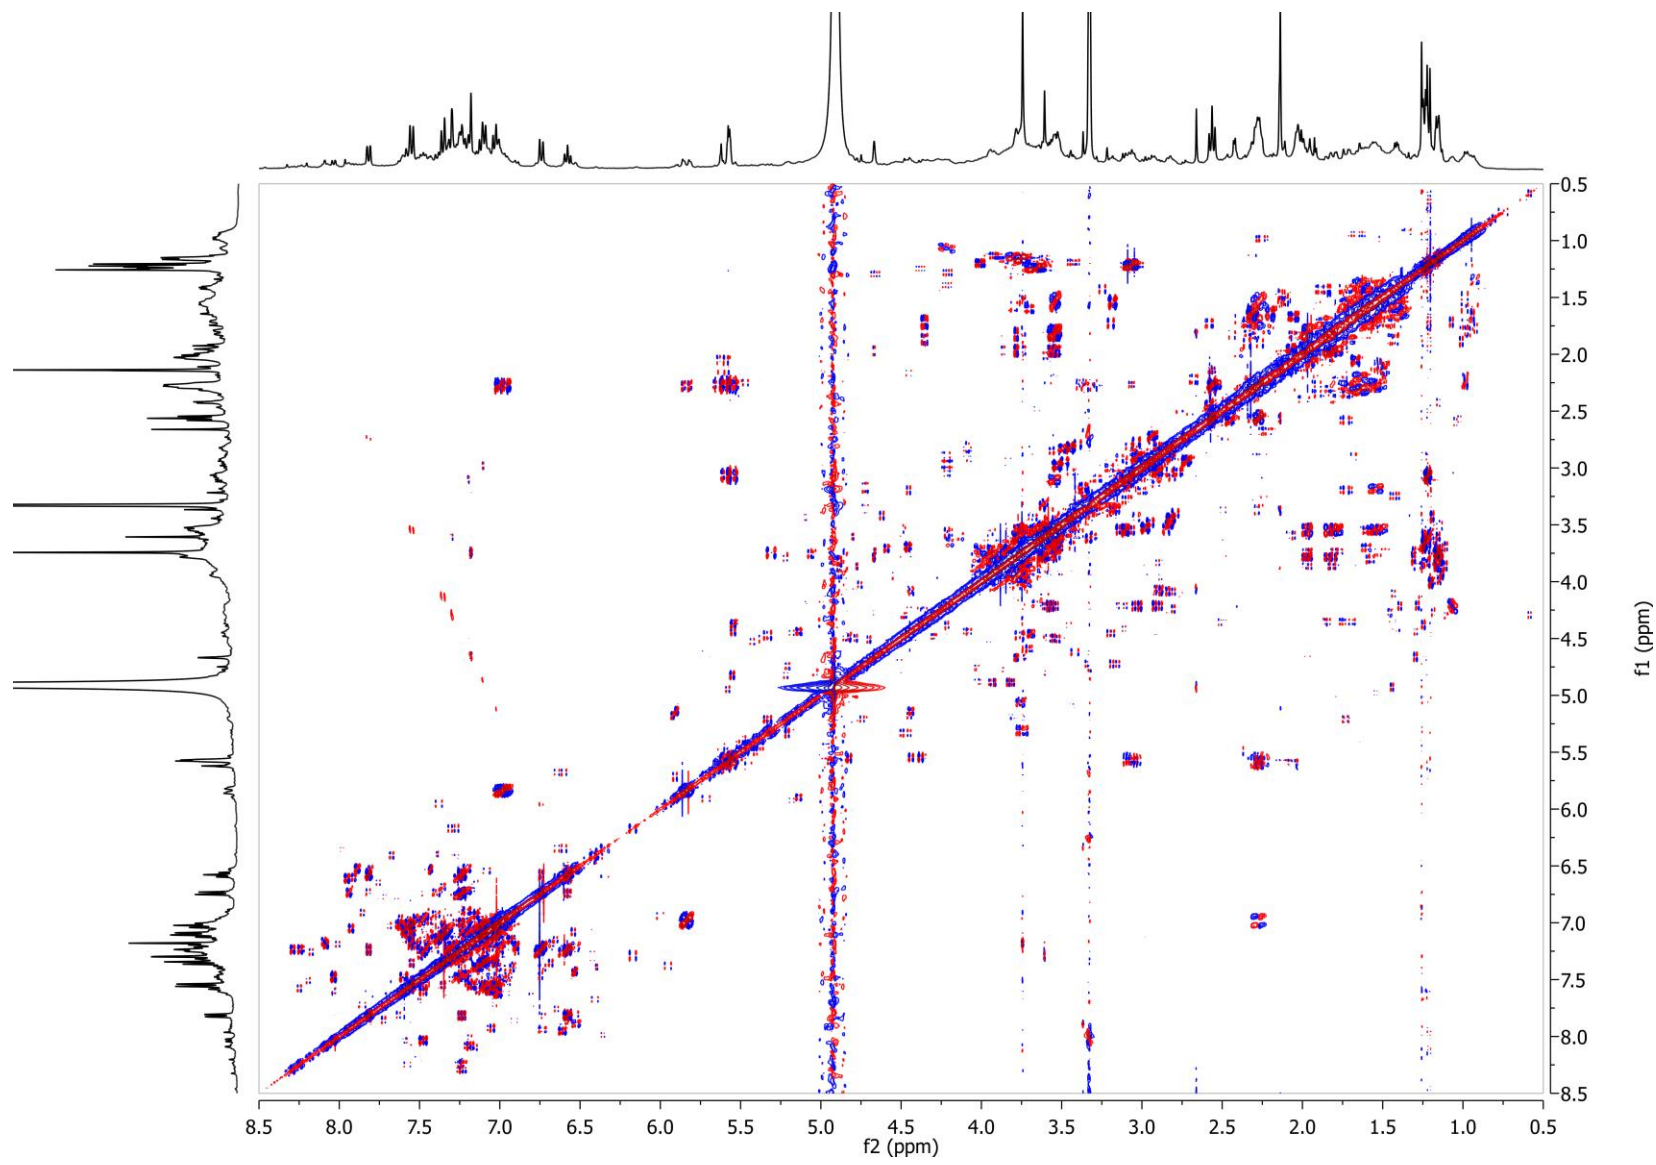

**Figure S86:**  $^1\text{H}$  NMR spectrum of *(7R,8R,2E)*-*threo*-8-[(3',6'-Dideoxy- $\alpha$ -L-*arabino*-hexopyranosyl)oxy]-7-hydroxy-2-nonenoic acid (*threo*-asc-7OH- $\Delta$ C9, **10a**) isolated from the *C. nigoni* exometabolome (~275  $\mu\text{g}$ ) in  $\text{CD}_3\text{OD}$ .

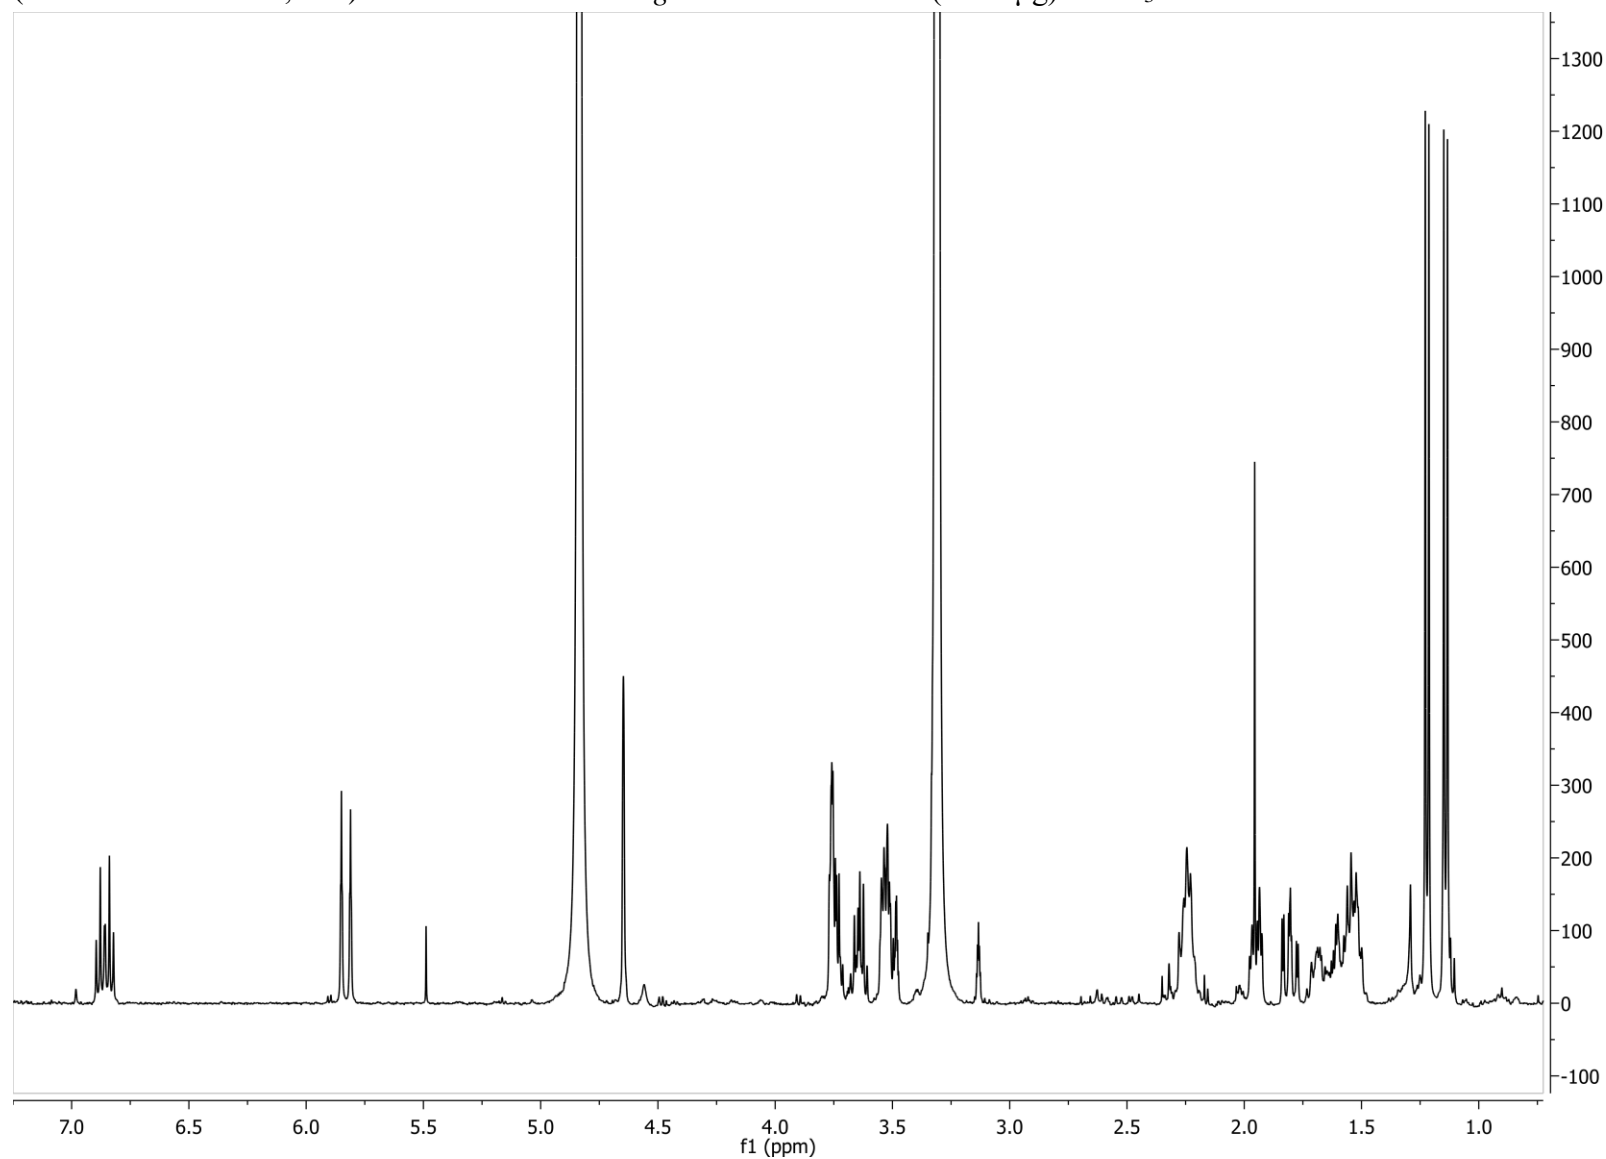

**Figure S87:** dqf-COSY spectrum of *(7R,8R,2E)*-threo-8-[(3',6'-Dideoxy- $\alpha$ -L-arabino-hexopyranosyl)oxy]-7-hydroxy-2-nonenic acid (*threo*-asc-7OH- $\Delta$ C9, **10a**) isolated from the *C. nigoni* exometabolome (~275  $\mu$ g) in CD<sub>3</sub>OD.

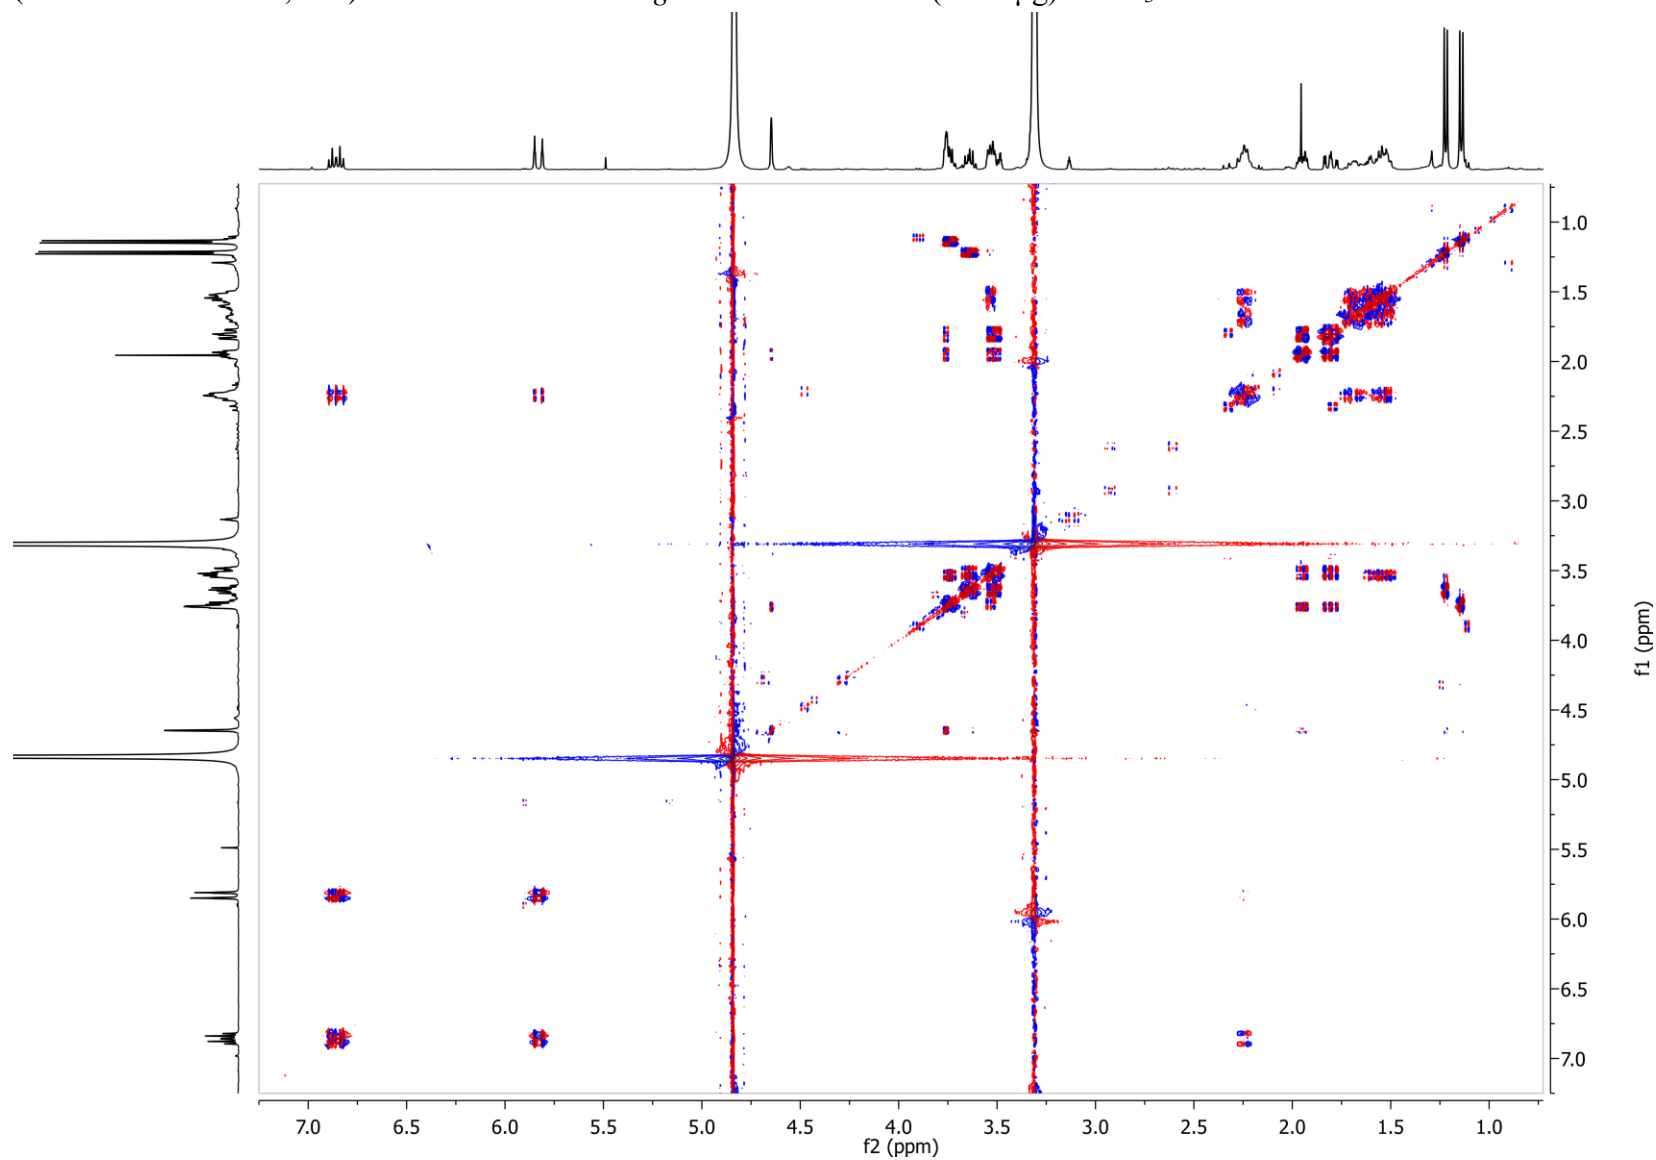

**Figure S88:** NOESY spectrum of *(7R,8R,2E)*-threo-8-[(3',6'-Dideoxy- $\alpha$ -L-arabino-hexopyranosyl)oxy]-7-hydroxy-2-nonenic acid (*threo*-asc-7OH- $\Delta$ C9, **10a**) isolated from the *C. nigoni* exometabolome (~275  $\mu$ g) in CD<sub>3</sub>OD.

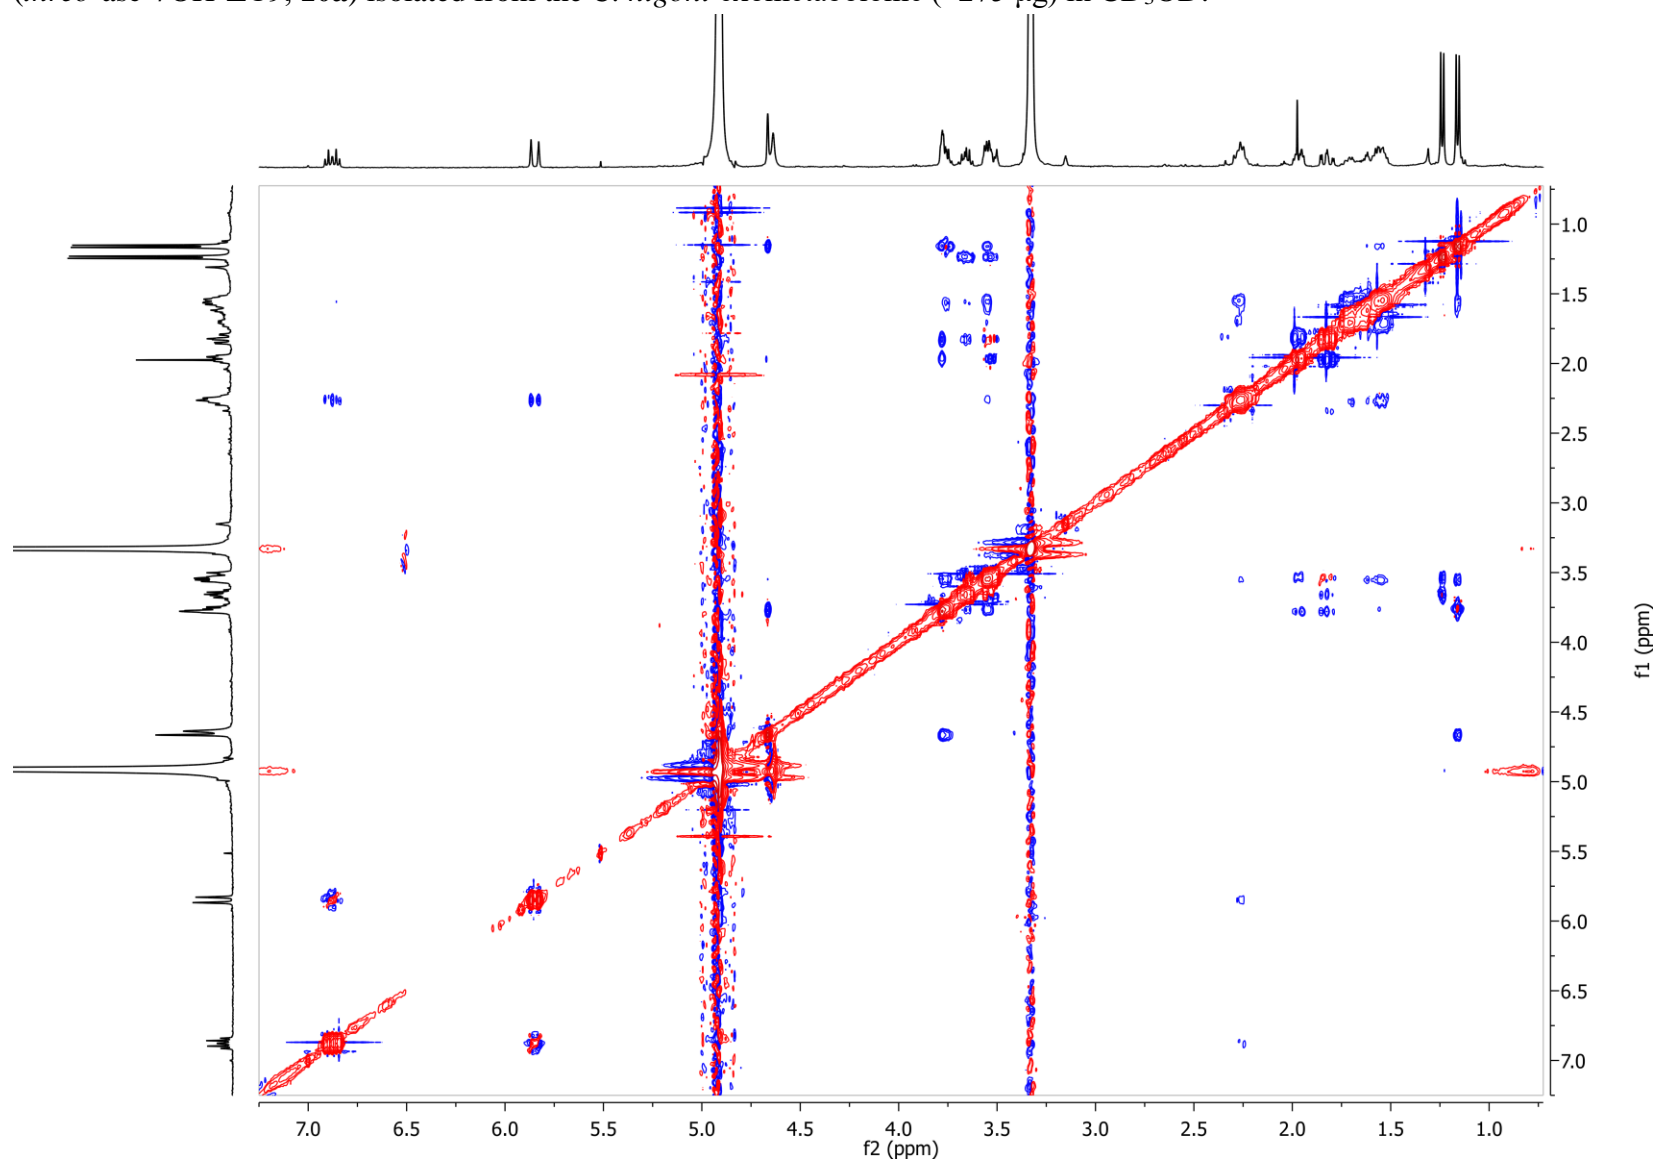

**Figure S89:** HSQC spectrum of *(7R,8R,2E)*-threo-8-[(3',6'-Dideoxy- $\alpha$ -L-arabino-hexopyranosyl)oxy]-7-hydroxy-2-nonenic acid (*threo*-asc-7OH- $\Delta$ C9, **10a**) isolated from the *C. nigoni* exometabolome (~275  $\mu$ g) in CD<sub>3</sub>OD.

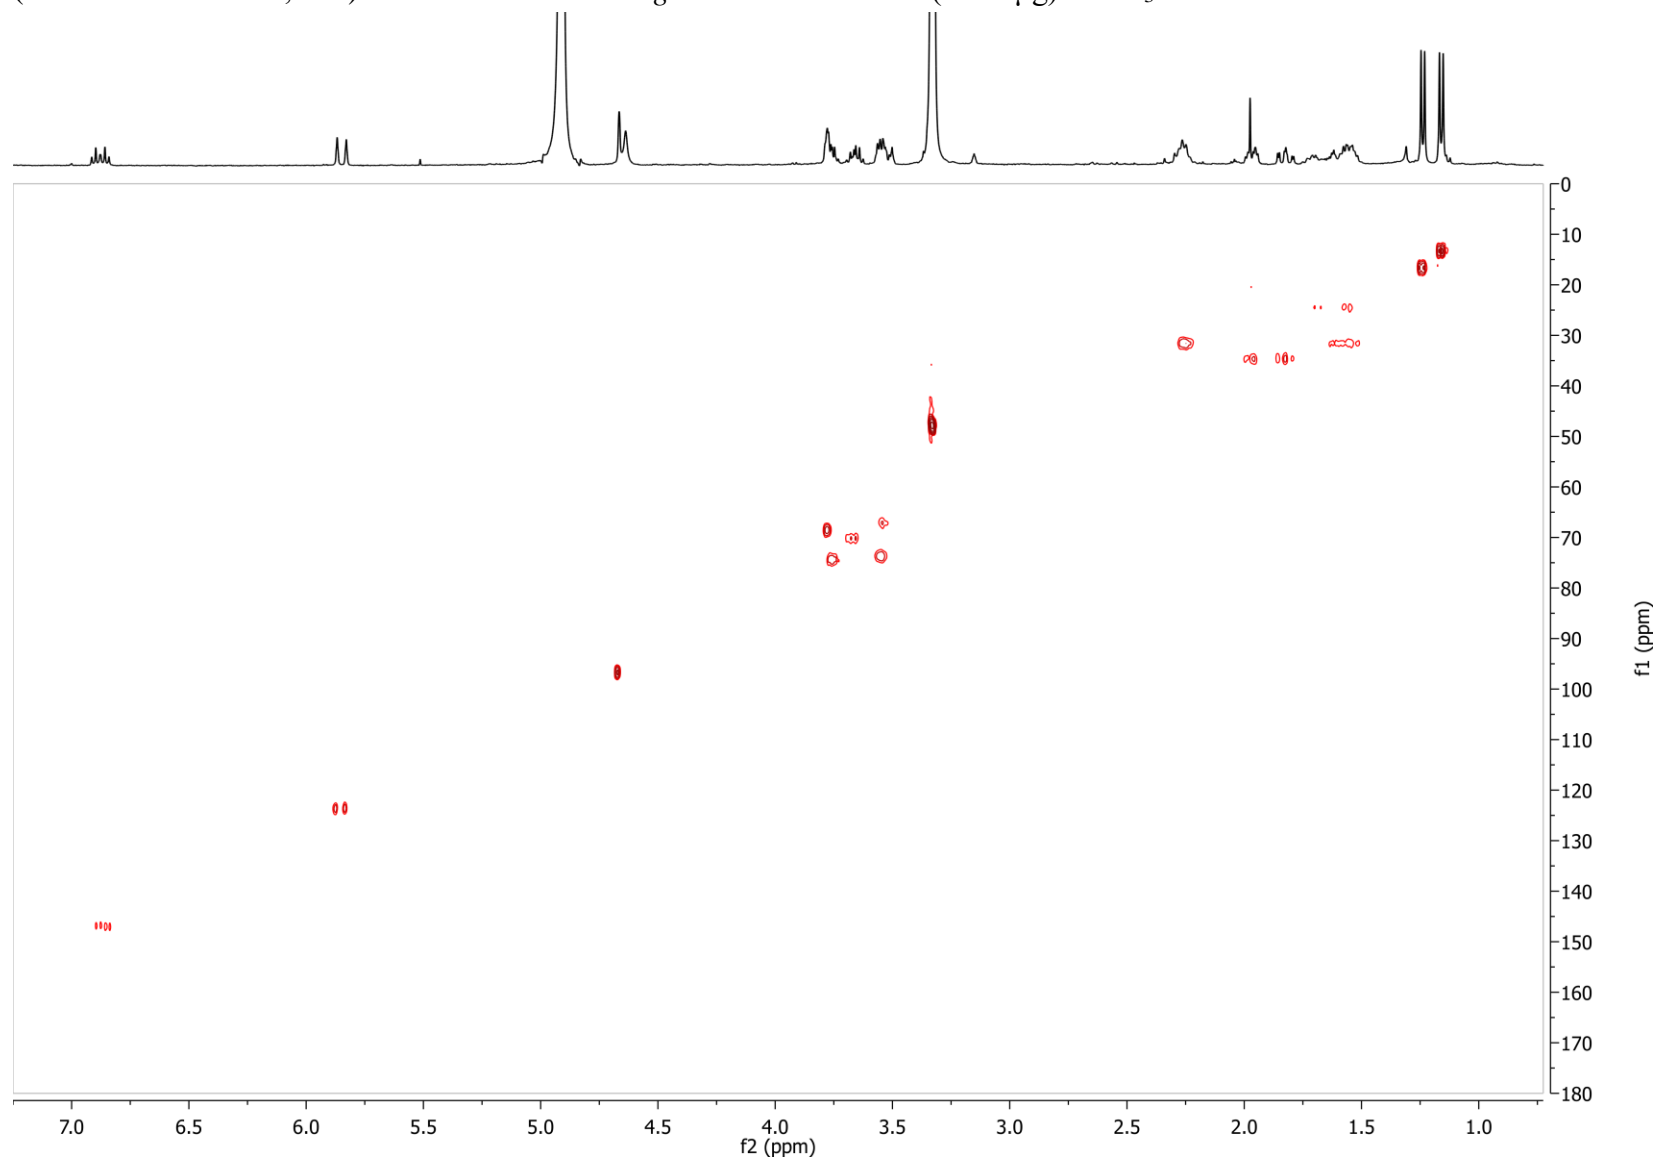

**Figure S90:**  $^1\text{H}$  NMR spectrum of (7*R*,8*R*)-*threo*-8-[(3',6'-Dideoxy- $\alpha$ -L-*arabino*-hexopyranosyl)oxy]-7-hydroxynonanoic acid (*threo*-asc-7OH-C9, **11**) isolated from the *C. nigrum* exometabolome (~110  $\mu\text{g}$ ) in  $\text{CD}_3\text{OD}$ .

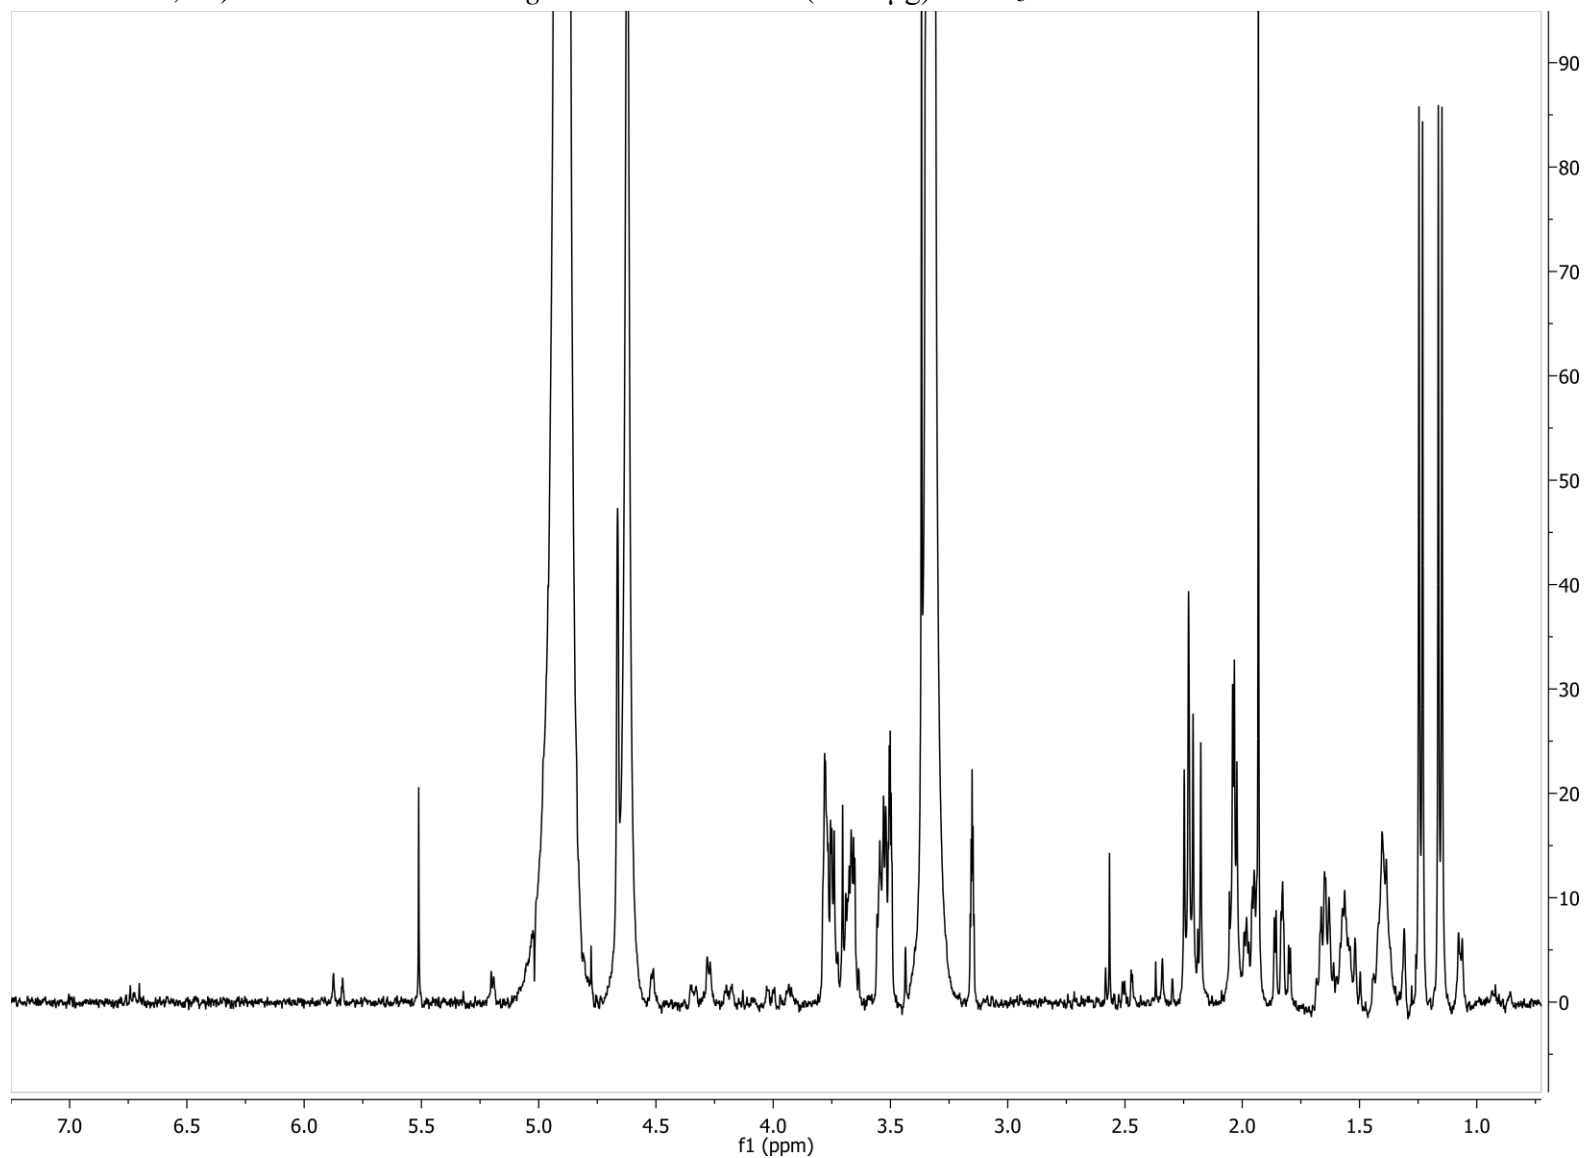

**Figure S91:** dqf-COSY spectrum of (7*R*,8*R*)-*threo*-8-[(3',6'-Dideoxy- $\alpha$ -L-arabino-hexopyranosyl)oxy]-7-hydroxynonanoic acid (*threo*-asc-7OH-C9, **11**) isolated from the *C. niger* exometabolome (~110  $\mu$ g) in CD<sub>3</sub>OD.

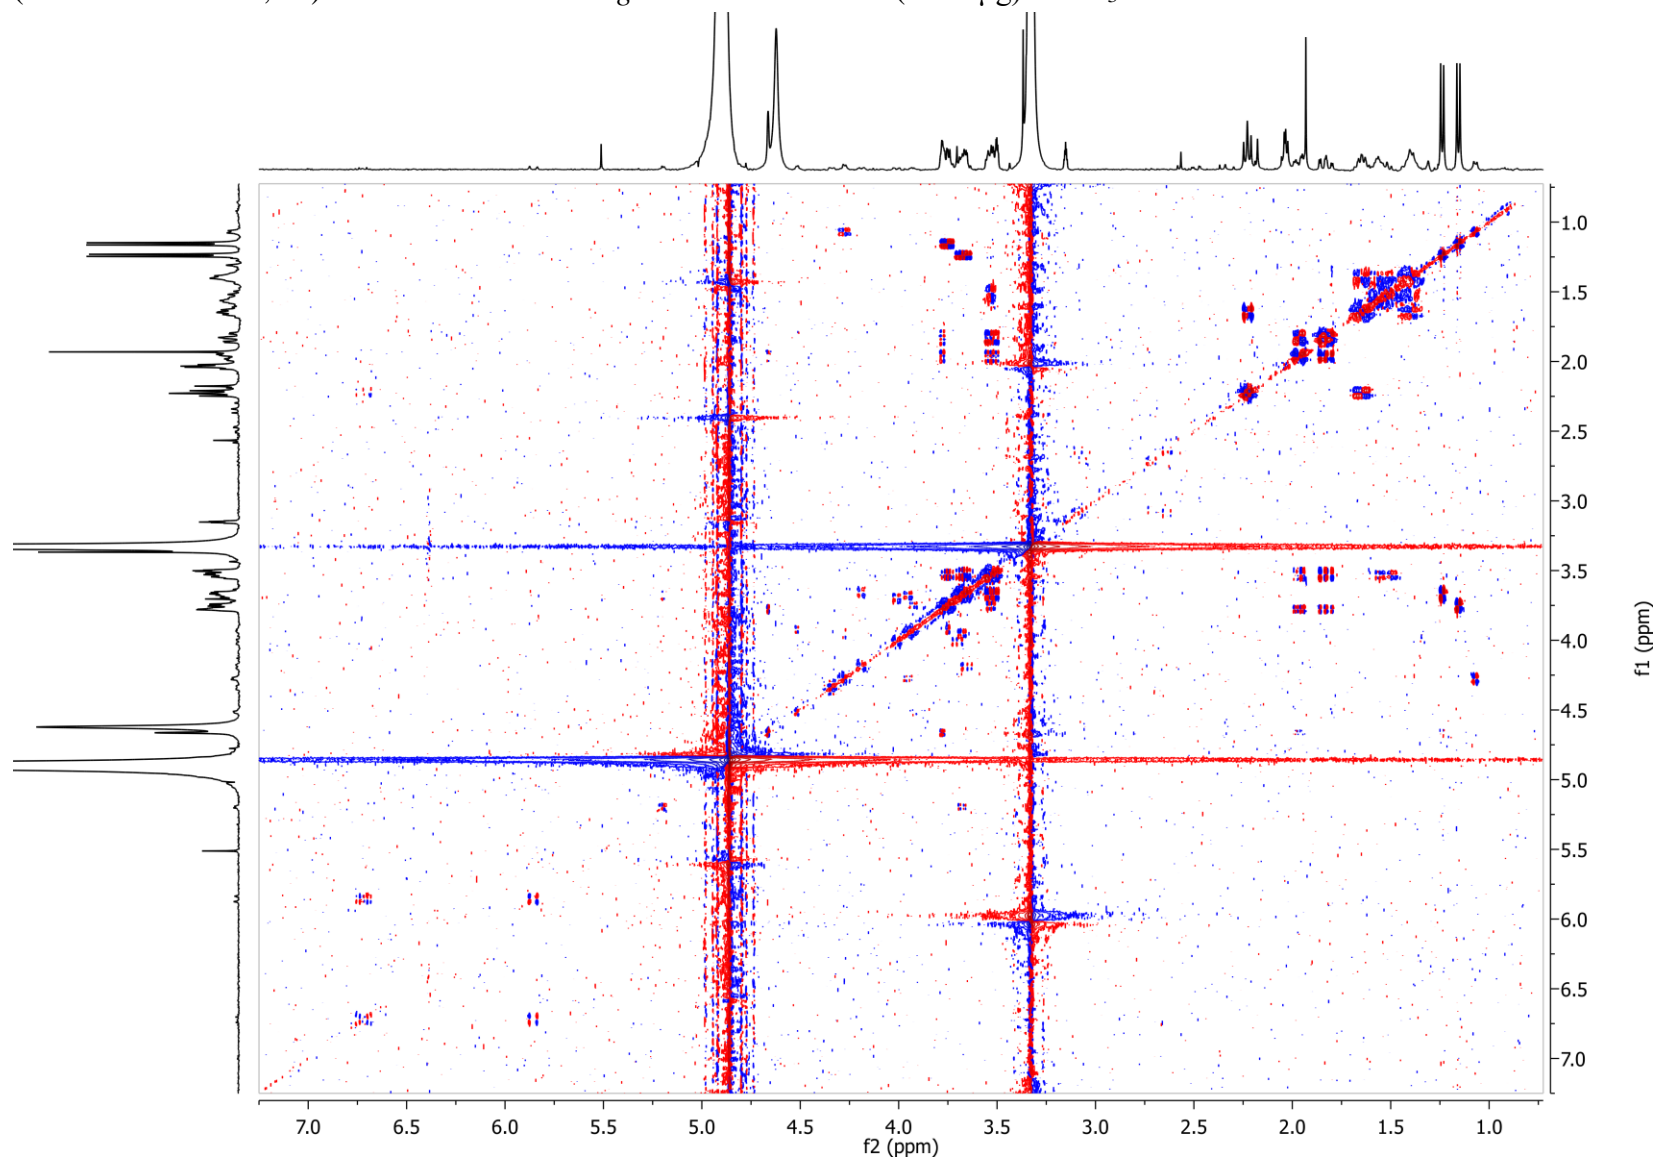



**Figure S92:** HSQC spectrum of *(7R,8R)*-*threo*-8-[(3',6'-Dideoxy- $\alpha$ -L-*arabino*-hexopyranosyl)oxy]-7-hydroxynonanoic acid (*threo*-asc-7OH-C9, **11**) isolated from the *C. nigoni* exometabolome (~110  $\mu$ g) in CD<sub>3</sub>OD.

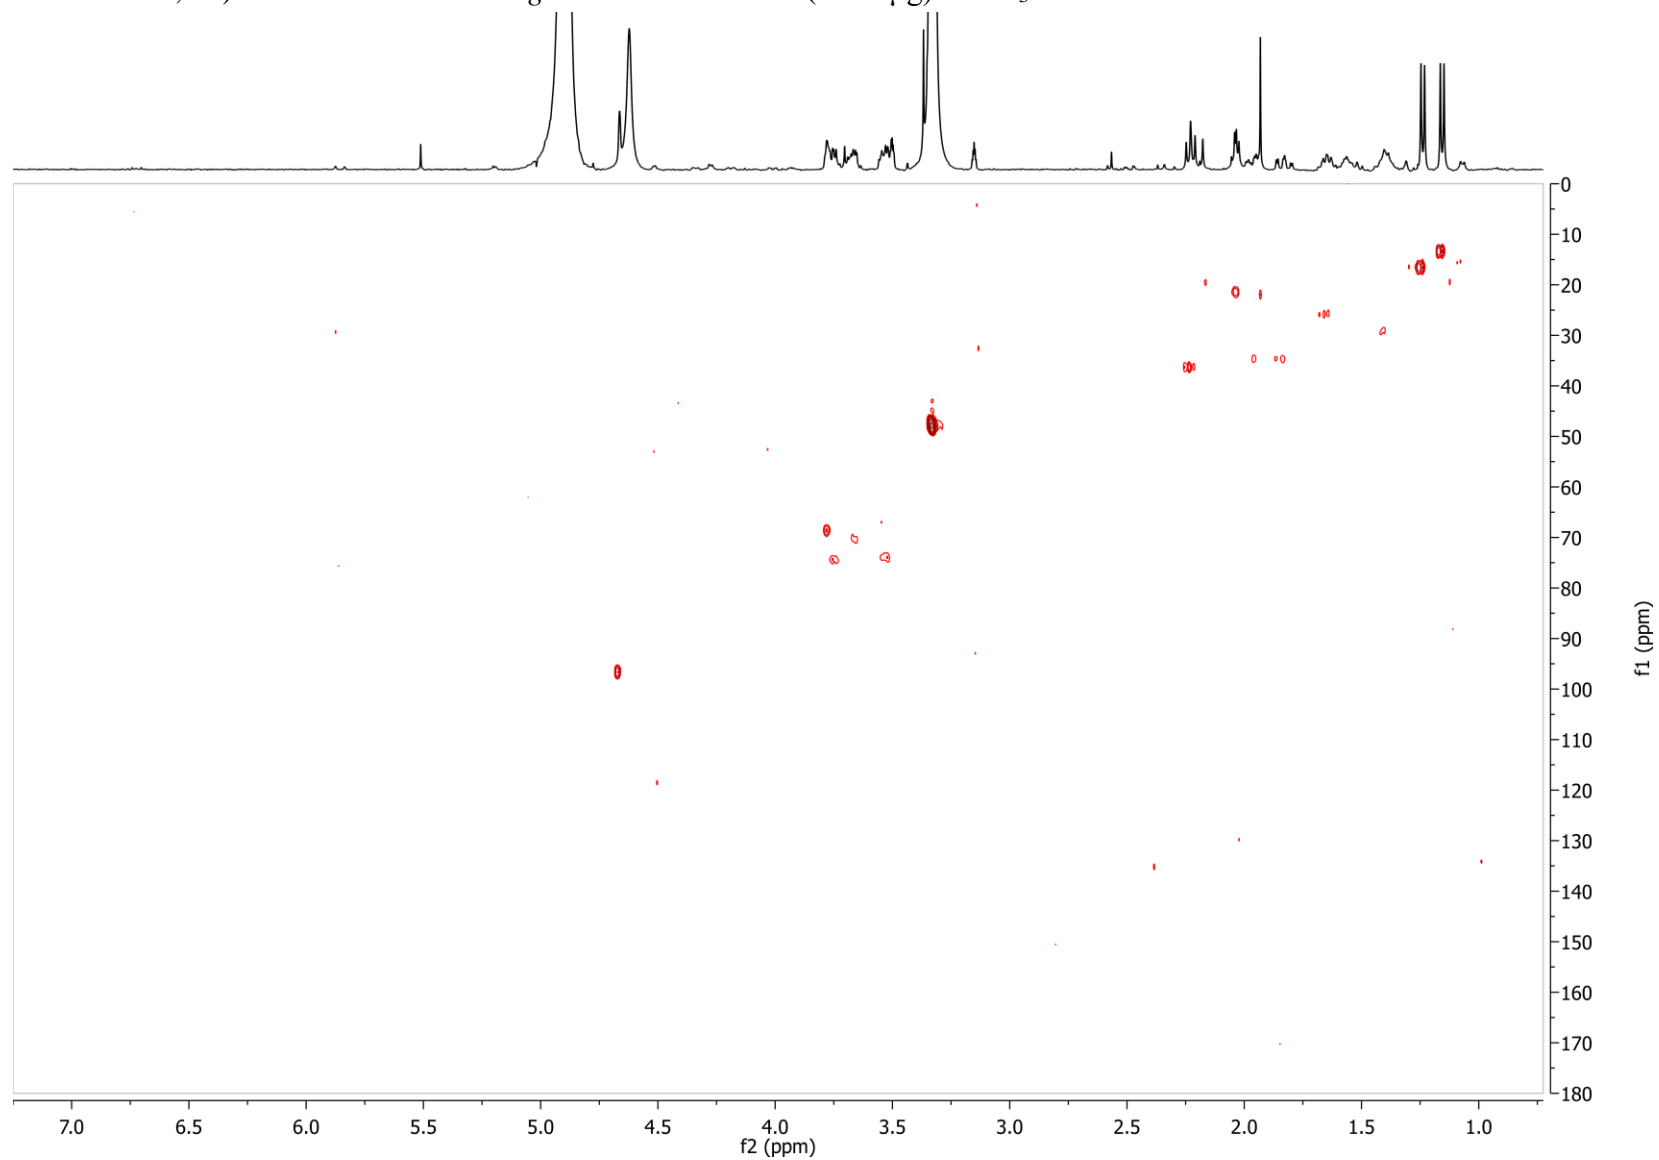

**Figure S93:**  $^1\text{H}$  NMR spectrum of (2*E*,8*S*)-8-[(3,6-Dideoxy- $\alpha$ -L-*arabino*-hexopyranosyl)oxy]-9-hydroxy-2-nonenic acid (asc-9OH- $\Delta$ C9, **12**) isolated from the *C. nigoni* exometabolome (~130  $\mu\text{g}$ ) in  $\text{CD}_3\text{OD}$ .

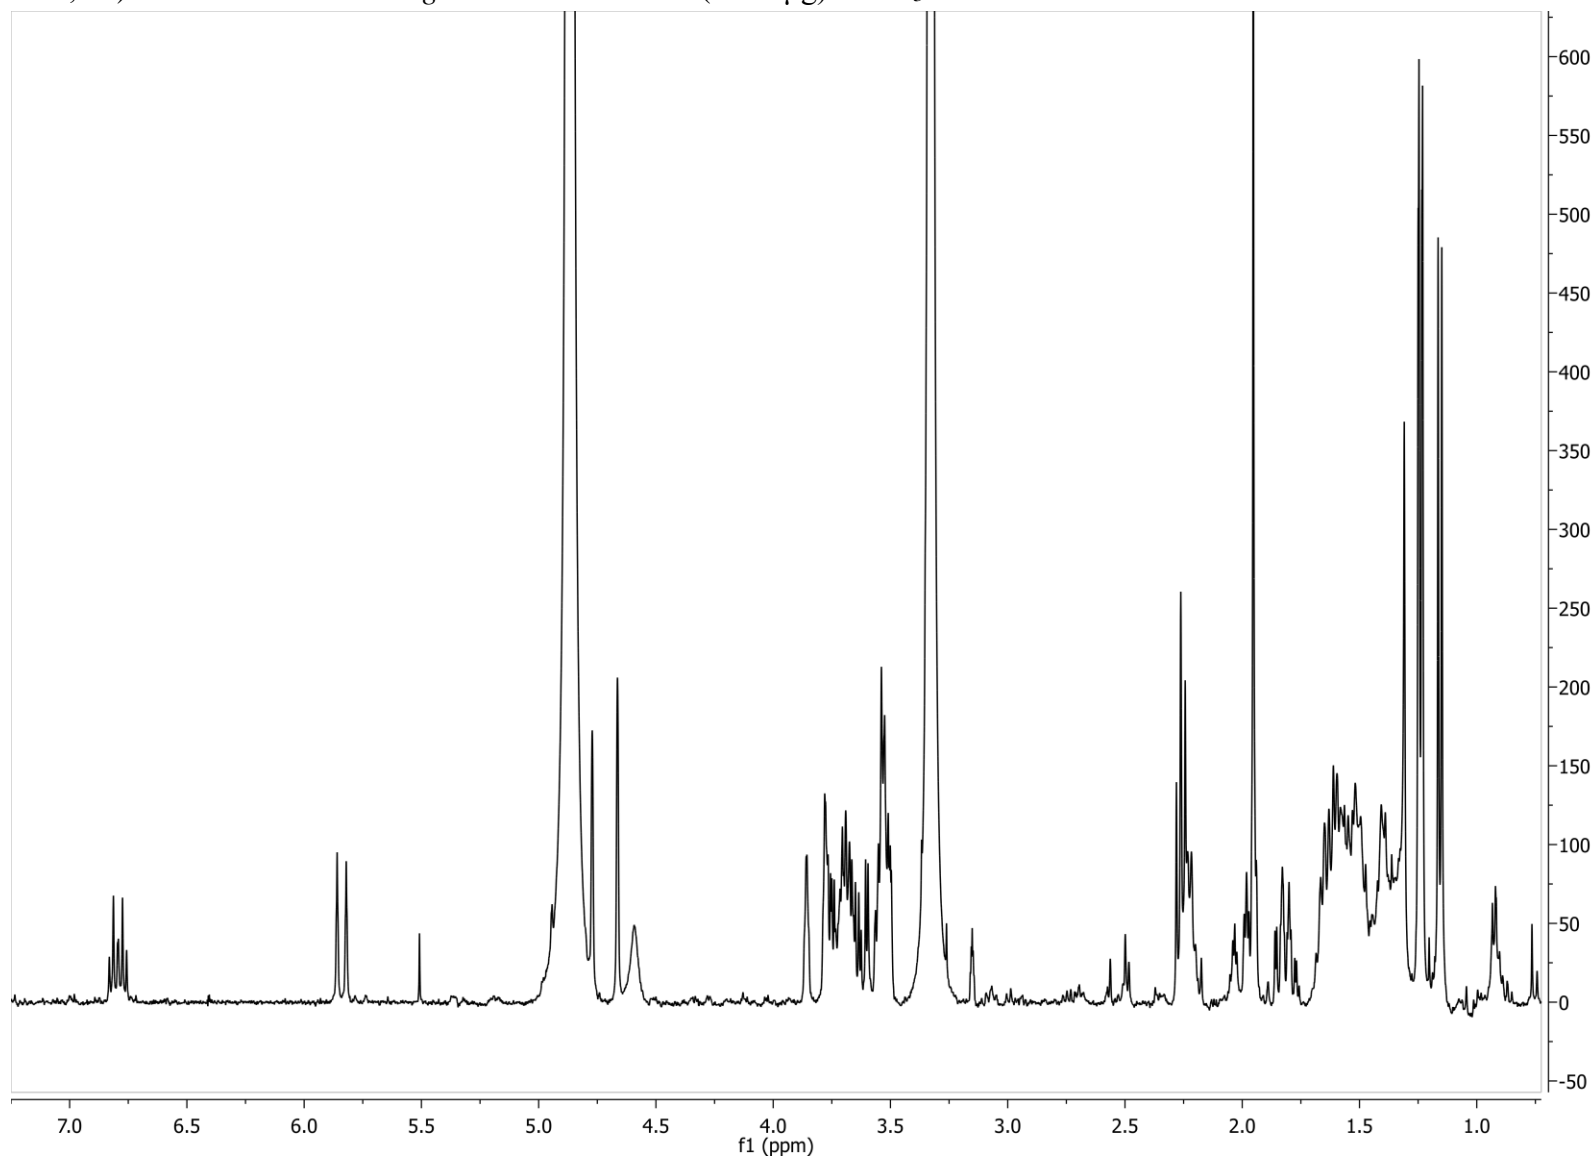

**Figure S94:** dqf-COSY spectrum of (2*E*,8*S*)-8-[(3,6-Dideoxy- $\alpha$ -L-arabino-hexopyranosyl)oxy]-9-hydroxy-2-nonenic acid (asc-9OH- $\Delta$ C9, **12**) isolated from the *C. nigoni* exometabolome (~130  $\mu$ g) in CD<sub>3</sub>OD.

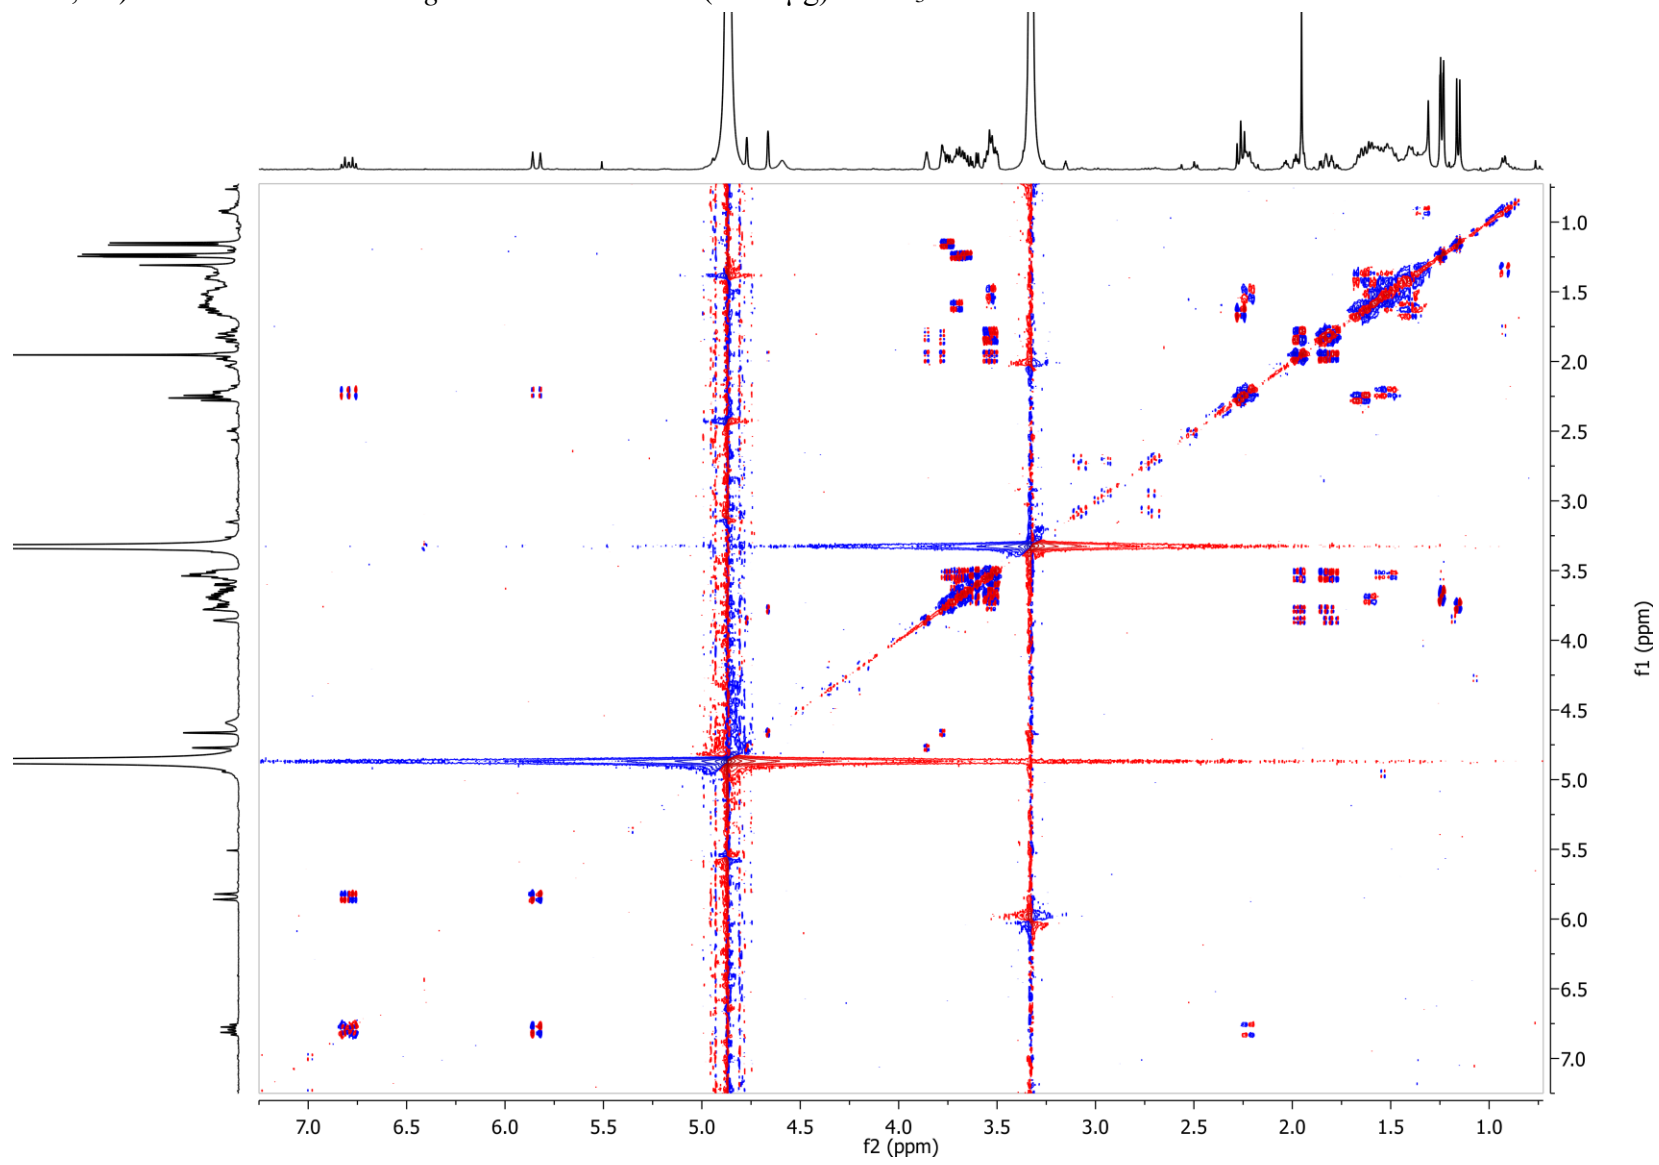

**Figure S95:** HSQC spectrum of (2*E*,8*S*)-8-[(3,6-Dideoxy- $\alpha$ -L-arabino-hexopyranosyl)oxy]-9-hydroxy-2-nonenic acid (asc-9OH- $\Delta$ C9, **12**) isolated from the *C. nigoni* exometabolome (~130  $\mu$ g) in CD<sub>3</sub>OD.

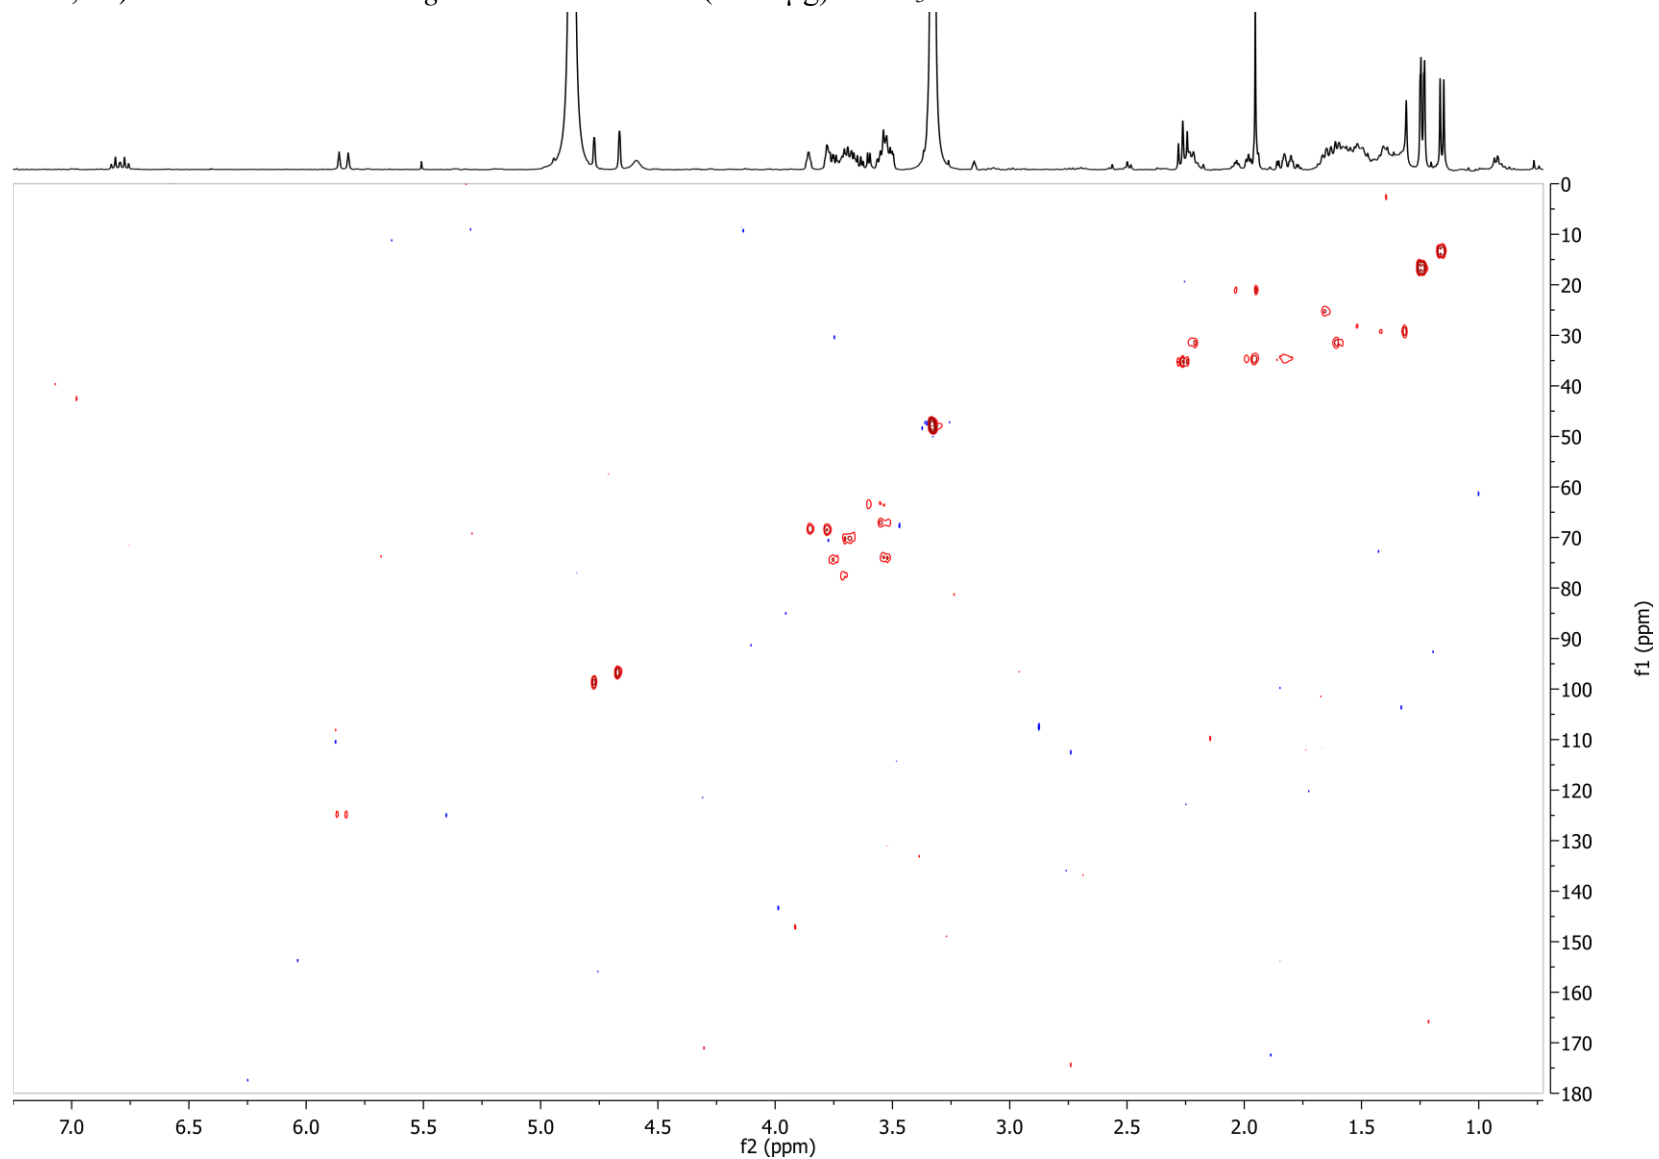

Supplement: NIHMS952250-supplement-Supplemental_Info.pdf [file NIHMS952250-supplement-Supplemental_Info.pdf]
